# Supplementary material for: Trajectory mapping of the early Drosophila germline reveals controls of zygotic activation and sex differentiation
Source: HighWire-hosted journal article supplement (doi:10.1101/gr.271148.120), 2021-04-15
Supplement: SupplementalTable_S1.xlsx [file SupplementalTable_S1.xlsx]

## Sheet: Sheet1
Table S1. Maternal and zygotic germline markers.
Maternal all	Maternal soma-	Zygotic all	Zygotic soma-
pgc	pgc	CG17650	CG17650
wisp	wisp	CG32971	CG32971
dhd	dhd	CG14346	CG14346
nos	nos	CG43088	CG43088
26-29-p	26-29-p	CG18605	CG18605
alphaTub67C	alphaTub67C	ATPsynepsilonL	ATPsynepsilonL
CanB2	CanB2	HP6	HP6
Jafrac1	mtrm	CG12477	CG12477
Stlk	rpk	RpS10a	RpS10a
mtrm	BigH1	CG42857	CG42857
rpk	CG8507	CG4415	CG4415
BigH1	Idh	qjt	qjt
Mdh2	PyK	CG14932	CG14932
CG8507	CG1927	P32	gnu
CycB	shu	gnu	hog
Echs1	CG6287	CG4004	CG32706
Idh	CG17734	hog	CG34261
MED26	plu	CG32706	Oxp
Atf6	Pdk	CG34261	Rcd-1r
PyK	Drep1	IscU	RpL22-like
CG1927	Pxt	Oxp	Rpt3R
retn	GstT1	Rcd-1r	CG15262
shu	Cen	Fkbp59	CG5194
CG6287	Gapdh1	RpL22-like	CG14864
CG17734	Cyp6v1	GLaz	CG14757
plu	Npc2a	Rpt3R	blanks
Pdk	Z600	CG3176	Cyt-c1L
CG12112	Gip	CG15262	CG6999
Sesn	CG11674	CG5194	agt
Drep1	Jabba	lncRNA:CR43356	CG14036
Tao	Uch	Chmp1	CG15398
Eno	BicD	CG32625	karr
me31B	Gabat	CG5039	Dhfr
CG7115	ebd2	CG14864	CG1894
Pxt	yip2	CG32486	Sdhaf3
GstT1	del	CG1890	CG11125
dnc	AGO3	CG15536	Tspo
Sod3	CG4404	CG7878	CG17625
Pino	CG4586	mRpS34	HP1D3csd
Pglym78	zpg	CG14757	RpL37b
Cen	CG30377	CG5045	Gs1l
Gapdh1	CG11899	SerRS	CG34228
Cyp6v1	CG17270	blanks	CG33494
Rrp47	spz	La	tej
Prosalpha4	CG31549	CSN7	CG12493
Npc2a	CG14894	vig2	mino
Uev1A	Got1	eIF4G2	CG32817
Z600	Thiolase	Sgt	stil
CG11334	CG15083	Cyt-c1L	CG34012
Chd64	CG17698	dj-1beta	RpS19b
Gip	grsm	mRpL2	CG17996
CG11674	CG31673	CG34250	CG8460
Jabba	bru1	CG6770	CG11722
Uch	UK114	CG12384	GstE13
GILT1	SNCF	CG6878	CG9926
BicD	CG15098	NHP2	CG43843
Gabat	CG10863	TfIIA-S	CG32243
ebd2	Spec2	mtSSB	CG7824
yip2	sisA	Tpc1	CG34031
CG7840	Prip	zetaCOP	CG12279
Pen	Idgf4	mRpS17	CG10013
CG12728	CG42445	mRpS21	c(3)G
Prosalpha6	CG2034	CG6999	CG33228
san	Pur-alpha	nmdyn-D7	CG33977
Prosbeta4	Gapdh2	Vsp37A	CG14135
Ubc4	Sptr	AIMP1	CG10063
Lsd-2	galectin	agt	Rab27
RapGAP1	CG32473	mRpL36	CG18213
tzn	CG18343	CG14036	CG3919
CG4570	stai	Pdcd4	ord
Prosbeta5	ana2	ReepB	CG6628
Use1	Dhit	Ssrp	Spn88Ea
CG31694	APC7	CG15398	Sld5
CG46385	CG30440	mRpL20	Fdx1
del	CG9917	Rrp4	Nmdmc
AGO3	CG5214	karr	Ant2
CG4404	glob1	CG5021	CG14931
Desat1	krimp	CNPYb
Prosalpha2	CG8891	Dhfr
Rad23	Aldh	CG11699
CG4949	CG10602	mre11
CG4586	hdc	CG17272
myo	GlyP	prel
CG11555	CG34200	CG3402
Bsg25D	CG1578	CG1894
zpg	CG11307	CG13901
lost	CG4502	Sdhaf3
CG30377	CG9471	CG11125
ref(2)P	CG33181	CG10340
CG11899	zuc	mRpL23
fabp	GstE1	mRpS26
UbcE2H	slgA	mbf1
CG17270	zen	Tspo
CG7220	mRRF1	CG17625
cue	CG6180	CG14543
CG6767	Bdbt	CG5590
halo	CG7530	HP1D3csd
lok	CG32512	Tim8
spz	AGBE	Rpn10
Sod1	CG10038	RpL37b
Prosalpha3	Pcd	Gs1l
Prosalpha7	CG9925	CG34228
CG31549	CG14434	CG7006
CG14894	CG6321	sds22
Got1	Hip1	ScsbetaG
mav	png	CG33494
Tm1	tun	mRpL55
Thiolase	Mal-A5	eIF3j
GstS1	CG10939	CCT8
CG15083	Tpi	tej
Prosalpha5	Tsp66E	ver
PHGPx	CG13397	CG8675
Prosbeta3	AMPdeam	CG4882
CG17698	fal	Hacd1
grsm	Mekk1	Roc2
Prosbeta2	TORIP	Uch-L5
cta	dl	Nup62
CG31673	cad	CG11790
CG11523	CG4408	Trf2
bru1	CR41597	Fen1
Prosbeta6	CG15047	CG3224
UK114	CG14545	CG5989
CG45050	Mos	CG12493
SNCF	CG40160	Tom7
CG4511	PIG-V	CG14341
pum	CG3679	CG14671
Sccpdh1	tapas	ND-19
Tom	CG10445	CG34132
rdx	CG12034	maf-S
Jwa	CG1907	Cyt-b5
CG34015	osk	CG15891
CG15098	Gasz	Not1
Pih1D1	tll	CG15014
UBL3		CG14480
icln		Arpc5
Vha14-1		mRpL34
CG17337		Ssb-c31a
cib		Pfdn6
Naa20A		Rpb11
scu		mino
grp		Mlf
CG10863		Srp54k
Spec2		CG32817
gt		Mat1
sisA		CG33506
Prip		stil
Mcad		CG34012
Idgf4		Vti1b
CG8223		Shmt
Nap1		CG6693
CG42445		RpS19b
CG2034		Prx6005
Pur-alpha		Psa
Prosbeta1		CG10343
CG12129		mge
Kap-alpha3		vas
tko		Nnp-1
Gapdh2		ND-SGDH
Tif-IA		Cbp20
CG4390		CG4598
Sptr		Uck
galectin		CG17996
cl		udd
Prx3		CG7339
CG32473		CG4866
RfC38		Taf13
Tlk		Dak1
Ald1		CG6195
eIF4E1		p47
Arpc2		RfC4
GPHR		CG14966
Maf1		CG8460
CG18343		Nop56
mei-P26		Grx1
tral		CG15019
CG6398		CG2021
CG17691		TfIIEalpha
CG13197		Rae1
Moe		zda
Dph5		Prat
SelR		CG11722
PCNA		CG34150
awd		rnh1
stai		GstE13
ifc		mRpL27
Pdha		CG7394
ovo		SpdS
CG2767		Trap1
Scsalpha1		UQCR-Q
msk		Sf3b5
Gbs-70E		CG14647
Tom40		IntS11
Rab11		hoip
Drep2		mRpL46
Trxr-1		Vps37B
CG11781		CG30373
dnk		SMC5
Fdh		Acyp2
gcl		CG5961
Mst85C		VhaAC45
ana2		asrij
Pomp		CG14321
Tre1		CG14270
Dhit		Rpn8
insv		CG15440
Tnpo		NP15.6
mad2		Chchd3
CG4968		ND-39
Idgf6		ND-49
Cpr		CG9926
APC7		CG31648
Fum1		CG9577
Prosbeta7		mRpL48
CG30440		CG17776
Ublcp1		ox
Parp		Fs(2)Ket
CSN6		mRpL30
CG12877		ND-PDSW
CG9917		Vps28
CG32267		ND-B15
CG5214		ND-B17
CG18446		Pa1
Pgk		ND-13B
Rab35		CG33051
Gdh		CG13807
CG10638		CG8993
Rox8		Lsm10
EndoU		ND-24
CG43658		mbo
glob1		CG18731
bip2		RtcB
uex		CG32409
blw		Rpt5
CG13887		ND-13A
lgs		CG5903
Rpn12		RpII18
Art1		spict
dup		mRpS24
eRF1		ppl
CG34125		CG7970
Phb2		CG7946
Sec61gamma		Ufc1
Taldo		ND-42
CG17454		CG9065
l(2)37Cc		mRpL16
CG11562		CG10674
tub		SdhA
lic		CG2147
krimp		CG5355
CG8891		CG10565
CG42259		mRpS2
Rpn5		Stip1
Aldh		RabX6
CG10602		SRPK
CCT5		LSm3
hdc		mRpS14
CkIIalpha		Bub3
Chchd2		CG5569
Ubc10		Rrp40
CG17508		CG8372
DENR		CG32069
Bet3		Srp14
CG9705		mRpL17
Hsp26		Atg18a
Mtpalpha		CG10470
CG2059		CG14977
Vha16-1		CG12343
Cdk1		CG43843
GlyP		CG8237
CG34200		mRpL18
Ptp61F		Nurf-38
ATPsynC		CG12096
wrd		CG32856
Ntf-2		Eogt
CG1578		CG17219
MED22		NUCB1
CG10778		Ufm1
CG11307		CG9034
CG4502		CG13365
Rcc1		CG4036
p23		mRpS33
mrj		UQCR-6.4
CG34117		CG32803
dco		CG11858
MAGE		CG11583
CG13551		Larp4B
wun2		ND-ASHI
eIF4G1		CG8635
CG7519		CG7506
Vha13		UQCR-C1
Rpt6		CG32243
mRpL1		Cks30A
sesB		Dim1
Nup50		dmpd
Cdc6		endos
aay		COX7A
CG9471		ND-B12
CG34159		bai
CCT6		CG1161
Rab2		dgt2
Droj2		Arl2
Su(var)2-10		CG14812
ScsbetaA		Nxt1
Rpe		rin
Sec22		unk
CG17514		Arpc4
Naxd		Nup107
CG33181		Max
Hsc70-3		CG7920
ERp60		CG12608
Skp2		mRpS6
kraken		shrb
CG3107		ND-B14.5B
ben		CG32441
CG6701		CG7824
CG17556		RpLP0-like
zuc		ThrRS
wech		epsilonCOP
GstE1		oaf
Rpn6		CG9205
CG9953		CG8397
CG7461		mRpL42
Hsp27		Rpn13
ATPsynF		CG31126
borr		Fer2LCH
CG11267		CaBP1
Pfdn2		CG33107
Aps		mRpL33
slgA		Pcmt
Cam		nop5
d4		CG12288
Fis1		beta4GalT7
scyl		CG7637
Aos1		l(2)k01209
CG5292		CG8209
Faf2		CG18178
Rpt1		Catsup
zen		ubl
Snp		CG31125
mRRF1		Spase12
Tim17b		Taf10b
CG6180		Dlish
PDCD-5		mRpS18C
Bdbt		Usp7
mld		Taf10
pbl		Spt7
Rcp		CG34031
h		CG17059
GstO2		Dtd
mRpS11		CG10462
Cul1		CG12279
Tudor-SN		CG12091
LysRS		CG17765
Clc		CG14407
CSN5		CG3609
squ		Mapmodulin
CG7530		Bet1
ND-ACP		Tfb1
ATPsynD		RFeSP
wal		Duba
CG2162		rudhira
CG12948		CG32708
Surf6		CG12170
CG12171		CG31360
Nop60B		CG10013
flw		CG15387
Ripalpha		koko
Rpt4		mRpS16
CG32512		Nnf1a
Rpn2		c(3)G
CaMKII		Gk1
mRpS10		CG8878
Glo1		alien
ics		Vap33
ATPsyndelta		CG9107
RNASEK		Bka
CG14561		Bin1
CG1622		beg
aPKC		RagC-D
Sc2		CG5854
Caf1-180		l(1)10Bb
VhaM9.7-b		CG2091
DnaJ-1		CCT1
Torsin		CRIF
Mcm5		CG1785
Hsp83		CG4789
AGBE		fmt
Bug22		wol
CG31937		SelT
CG3662		CG3817
Arf102F		mRpL14
CG5323		CG9586
Rb97D		mRpL49
CG10038		CG12393
Nedd8		O-fut1
CG14229		Fip1
CG12547		CG18528
msd1		CG6028
sgll		MED11
CG12237		CG33228
Rcd-1		Rpn1
pr		mRpS9
UQCR-11		bigmax
nudC		ND-B16.6
Pcd		smid
CG43313		CG15877
alpha-Cat		Pus1
CG14715		ND-B14.7
EMRE		emb
CG5235		aurA
AnxB9		Galphai
ATPsynCF6		CG1703
CG9328		Sgf11
CG9925		Cp1
eEF1delta		InR
CG14434		CG10903
cno		COX5B
CG42239		CG5676
Sms		CG1888
Cyt-c1		ND-23
CG2852		EloC
CG10417		CG33977
CG6321		Mnn1
Hip1		nclb
mRpL52		CG13018
CaMKI		Sem1
Alg-2		CG2017
mRpL12		Prp31
eIF4B		l(1)G0004
alphaSnap		Not3
Vha44		CG5439
CCT7		PMP34
png		CG1598
ATPsyngamma		spoon
Rpi		Sbat
CG11077		CG12107
tun		GCC88
Mal-A5		MED7
feo		mgr
mRpL28		CG14210
Cyt-c-p		SppL
hang		Tsp42Ee
CG10939		CG30001
CG41128		bonsai
ND-AGGG		eIF2beta
CG7834		Spt-I
dUTPase		levy
MCTS1		Pgi
unc-13		CG3776
CG17683		Mink
CREG		CG14135
Srp9		EMC3
ATPsynE		Art8
geminin		Idi
Tpi		SNRPG
Nca		wdb
Smn		CG2182
Sirup		Hsc70Cb
CG11137		HisRS
tum		BCL7-like
CG13220		CG10063
Dlc90F		how
Tsp66E		CG18190
CG13397		CG9240
Hat1		Ppt1
Ugt36E1		alph
CG7182		Rpb5
CG31715		Nup44A
sun		Tapdelta
CG1440		Rab27
Dci		Ufd1-like
HIP-R		ND-B14
Slbp		Rpn11
HP4		RecQ4
roh		MrgBP
ND-20		PIG-K
Cwc25		CG14805
Chrac-14		CG13751
CG5515		mRpL19
CG7789		CG14657
Nipped-B		RpI12
CG1307		pav
CG2811		Mcm6
ND-B22		elm
Mtap		CG18213
CG7945		COX7C
janA		Ak6
CG1896		CG11563
Nph		mod
CG1636		mRpS29
Rbm13		Rat1
CycB3		CG7655
Lamp1		CG17385
Sod2		e(y)1
AMPdeam		PrBP
porin		CG14182
CCT4		14-3-3epsilon
CG1354		Psf2
eIF5		Rpn7
Rheb		CG11752
Tom20		Mtch
CG14464		REPTOR-BP
twin		mRpL47
sxc		Uba2
CCT3		CG2915
DCP1		RpS15Ab
Dhod		Fnta
Nse1		ND-18
Spn27A		Ns1
sced		ND-B18
fal		CG3594
mei-38		Myc
Mekk1		CG3919
TORIP		angel
CG15168		CG8108
CG33941		ND-B17.2
pch2		mRpL51
l(2)k14505		CG42232
colt		CG3663
CG5199		Pka-C1
mnb		CG7997
spt4		YME1L
CG2004		Neb-cGP
CG31523		CG18815
CG11980		l(2)k09848
dl		ball
Wdfy2		Psf3
RPA3		COX8
RnpS1		ATPsynG
ghi		Arl1
Mad		Rab1
mRpL54		REG
NO66		Nfs1
Su(Tpl)		RpL24-like
CG10214		CG7630
COX4		CG15012
CG11596		CG15456
CG11999		mRpS22
CG1943		loj
SdhB		Psc
l(3)02640		ND-51
AIMP2		CG2063
CG14286		CG1418
bbc		SmF
Usp14		Vps20
aurB		mRpL40
Gos28		ord
Pka-R1		BCAS2
GlnRS		Alg1
crq		boca
Kdm4A		Atg8a
Slmap		CG8481
cad		Gdi
sigmar		CG6628
Tina-1		Spn88Ea
TER94		Sld5
Arl6IP1		Trx-2
CG4408		Cyp1
CR41597		BI-1
spri		Atx2
QIL1		CG3719
Syx13		GILT2
Ran		Hrb27C
CG15047		CG7275
Phf5a		Nbr
CG11417		COX5A
gro		Nup75
Cdk2		CG32022
CG3198		l(2)37Cg
CG44242		Kr-h2
CG14545		mRpL21
prg		CG15432
sina		Arp1
BthD		trsn
Mos		tank
ATPsynO		kud
Rpt3		eIF6
TfIIFalpha		CG3760
Gprk1		CG30105
vsg		CG33774
Rab8		CG1234
CG2865		Opa1
CG40160		CDK2AP1
Hsp23		CSN8
CG3420		Fdx1
Neos		ATP6AP2
cact		CG14483
Tim9a		Vha36-1
PIG-V		eIF4H1
CSN4		und
Hsp60A		p24-1
pont		Vps60
Rpn3		Updo
CG4686		RpL34a
CG3679		TM9SF2
Mkrn1		CG6567
Pgm1		ksh
Pfdn1		aub
CG5532		CG8545
HipHop		SmE
128up		Pex14
ND-MWFE		nudE
Paf-AHalpha		eIF3e
CG5969		CG11964
tapas		CG14683
CG10445		Nmdmc
Snr1		CG30423
Prosap		Rbp1
Cchl		CG11590
Sec13		hrg
TfIIA-L		CG11180
bic		CG6523
cindr		CG3223
CG12848		Rpb10
Hex-A		CG2246
SmD1		Rnp4F
Usp39		CG9286
UGP		Den1
Cisd2		CG14057
gw		Arpc1
dgrn		mRpS35
Gyf		ppan
CG12034		vito
CG1907		CG14194
CG2862		SmB
Dad1		Blos3
CG11367		Ant2
Rpn9		aph-1
Smox		Mo25
Su(fu)		Ptpa
osk		CG17652
Gasz		CBP
CG32276		CG14931
TFAM		exd
His3.3B		CG5059
CG2076		tws
wge		Mcm7
Aladin		Prpk
CG6171		CG31301
Rpt2		ncm
Tango11		Rpb8
tll		ArfGAP3
HIP		Hmu
Tbp		CG8490
mahe		eEF1beta
CG8036		Snx3
ATPsynB		Fkbp12
Fer1HCH
Sgt1
CG17486
eEF1gamma
JTBR
Tango4
CG10880
ND-30
CG41099
Fkbp39
lt
