# Supplementary material for: Trajectory mapping of the early Drosophila germline reveals controls of zygotic activation and sex differentiation
Source: HighWire-hosted journal article supplement (doi:10.1101/gr.271148.120), 2021-04-15
Supplement: SupplementalTable_S2.xlsx [file SupplementalTable_S2.xlsx]

## Sheet: Sheet1
Table S2. GO enrichment analysis of soma-positive zygotic germline genes.
source	term_name	term_id	adjusted_p_value
GO:CC	mitochondrial protein complex	GO:0098798	1.16134e-47
GO:CC	intracellular membrane-bounded organelle	GO:0043231	6.05075e-43
GO:CC	protein-containing complex	GO:0032991	5.78726e-41
GO:CC	membrane-bounded organelle	GO:0043227	9.26702e-41
GO:CC	intracellular	GO:0005622	7.9273e-38
GO:CC	mitochondrion	GO:0005739	6.76494e-35
GO:CC	intracellular organelle	GO:0043229	9.7572e-35
GO:CC	organelle	GO:0043226	4.13832e-33
GO:CC	cytoplasm	GO:0005737	5.61781e-30
GO:CC	membrane-enclosed lumen	GO:0031974	9.12854e-28
GO:CC	intracellular organelle lumen	GO:0070013	9.12854e-28
GO:CC	organelle lumen	GO:0043233	9.12854e-28
GO:CC	mitochondrial ribosome	GO:0005761	1.90498e-27
GO:CC	organellar ribosome	GO:0000313	1.90498e-27
GO:CC	respiratory chain complex	GO:0098803	1.69499e-24
GO:CC	ribonucleoprotein complex	GO:1990904	1.70197e-24
GO:CC	mitochondrial respirasome	GO:0005746	2.81064e-23
GO:CC	respirasome	GO:0070469	4.17827e-23
GO:CC	inner mitochondrial membrane protein complex	GO:0098800	8.4619e-22
GO:CC	mitochondrial matrix	GO:0005759	1.50134e-20
GO:CC	mitochondrial respiratory chain complex I	GO:0005747	6.8354e-18
GO:CC	respiratory chain complex I	GO:0045271	6.8354e-18
GO:CC	NADH dehydrogenase complex	GO:0030964	6.8354e-18
GO:CC	mitochondrial inner membrane	GO:0005743	1.53811e-17
GO:CC	organelle inner membrane	GO:0019866	2.18934e-17
GO:CC	oxidoreductase complex	GO:1990204	3.77168e-17
GO:CC	envelope	GO:0031975	4.18367e-17
GO:CC	organelle envelope	GO:0031967	4.18367e-17
GO:CC	mitochondrial envelope	GO:0005740	4.98559e-17
GO:CC	ribosomal subunit	GO:0044391	6.10106e-17
GO:CC	mitochondrial membrane	GO:0031966	1.05195e-16
GO:CC	membrane protein complex	GO:0098796	9.85688e-16
GO:CC	ribosome	GO:0005840	4.16039e-15
GO:CC	organellar large ribosomal subunit	GO:0000315	5.08491e-15
GO:CC	mitochondrial large ribosomal subunit	GO:0005762	5.08491e-15
GO:CC	nucleolus	GO:0005730	7.95533e-15
GO:CC	catalytic complex	GO:1902494	4.59854e-14
GO:CC	mitochondrial small ribosomal subunit	GO:0005763	6.25439e-13
GO:CC	organellar small ribosomal subunit	GO:0000314	6.25439e-13
GO:CC	organelle membrane	GO:0031090	1.31993e-11
GO:CC	nuclear lumen	GO:0031981	2.23538e-10
GO:CC	large ribosomal subunit	GO:0015934	1.43575e-09
GO:CC	non-membrane-bounded organelle	GO:0043228	1.70137e-08
GO:CC	intracellular non-membrane-bounded organelle	GO:0043232	1.70137e-08
GO:CC	preribosome	GO:0030684	3.87925e-08
GO:CC	nucleus	GO:0005634	7.85506e-08
GO:CC	small ribosomal subunit	GO:0015935	2.77139e-07
GO:CC	proteasome accessory complex	GO:0022624	1.40076e-06
GO:CC	peptidase complex	GO:1905368	3.11132e-06
GO:CC	cytochrome complex	GO:0070069	6.10647e-06
GO:CC	proteasome regulatory particle	GO:0005838	6.99044e-06
GO:CC	preribosome, large subunit precursor	GO:0030687	7.06506e-06
GO:CC	nucleoplasm	GO:0005654	2.99105e-05
GO:CC	nuclear DNA-directed RNA polymerase complex	GO:0055029	0.000143497
GO:CC	DNA-directed RNA polymerase complex	GO:0000428	0.000168431
GO:CC	RNA polymerase complex	GO:0030880	0.00019724
GO:CC	endopeptidase complex	GO:1905369	0.00126621
GO:CC	proteasome complex	GO:0000502	0.00126621
GO:CC	RNA polymerase II, holoenzyme	GO:0016591	0.0022782
GO:CC	respiratory chain complex III	GO:0045275	0.00266264
GO:CC	mitochondrial respiratory chain complex III	GO:0005750	0.00266264
GO:CC	spliceosomal tri-snRNP complex	GO:0097526	0.0028024
GO:CC	ESCRT complex	GO:0036452	0.00348826
GO:CC	RNA polymerase I complex	GO:0005736	0.00364439
GO:CC	RNA polymerase III complex	GO:0005666	0.00411036
GO:CC	small nucleolar ribonucleoprotein complex	GO:0005732	0.00690884
GO:CC	U4/U6 x U5 tri-snRNP complex	GO:0046540	0.00741506
GO:CC	transferase complex, transferring phosphorus-containing groups	GO:0061695	0.00773479
GO:CC	proteasome regulatory particle, lid subcomplex	GO:0008541	0.00983798
GO:CC	respiratory chain complex IV	GO:0045277	0.0104955
GO:CC	ESCRT I complex	GO:0000813	0.0121623
GO:CC	U4 snRNP	GO:0005687	0.0155927
GO:CC	nuclear pore	GO:0005643	0.0236695
GO:CC	spliceosomal snRNP complex	GO:0097525	0.0354013
GO:CC	RNA polymerase II, core complex	GO:0005665	0.03545
GO:CC	precatalytic spliceosome	GO:0071011	0.035496
GO:CC	endosome membrane	GO:0010008	0.0461581
