# Supplementary material for: Trajectory mapping of the early Drosophila germline reveals controls of zygotic activation and sex differentiation
Source: HighWire-hosted journal article supplement (doi:10.1101/gr.271148.120), 2021-04-15
Supplement: SupplementalTable_S4.xlsx [file SupplementalTable_S4.xlsx]

## Sheet: sexed dataset female markers
Table S4. Top 25 male and female marker genes in the early embryonic germline.
gene_id	gene_short_name	marker_score	mean_expression	fraction_expressing	specificity	pseudo_R2	marker_test_p_value	marker_test_q_value
FBgn0267505	pre-rRNA:CR45845	0.724116	2.98442	0.935702	0.773875	0.563537	2.0705e-165	7.35152e-161
FBgn0004656	fs(1)h	0.559254	6.30634	0.998308	0.560202	0.330988	8.58722e-93	3.04898e-88
FBgn0278608	Dsp1	0.522852	9.16808	1	0.522852	0.265962	7.09353e-74	2.51863e-69
FBgn0086558	Ubi-p5E	0.565335	3.58624	0.974619	0.580058	0.210063	4.83584e-58	1.71701e-53
FBgn0030400	Pits	0.545238	2.07268	0.967851	0.563349	0.192298	4.34535e-53	1.54286e-48
FBgn0265523	Smr	0.549752	3.46344	0.969543	0.567022	0.173605	6.47142e-48	2.29774e-43
FBgn0285926	Imp	0.526929	7.98317	1	0.526929	0.165363	1.20036e-45	4.26201e-41
FBgn0030311	CG11699	0.531249	2.90372	0.99154	0.535782	0.162421	7.71113e-45	2.73792e-40
FBgn0004647	N	0.552189	3.63026	0.976311	0.565587	0.160204	3.12933e-44	1.1111e-39
FBgn0267910	lncRNA:CR34335	0.557065	28.4159	1	0.557065	0.156388	3.47455e-43	1.23367e-38
FBgn0052767	CG32767	0.534486	2.30843	0.966159	0.553207	0.155011	8.27627e-43	2.93857e-38
FBgn0261811	pico	0.532934	1.86088	0.956007	0.557458	0.147317	1.0468e-40	3.71677e-36
FBgn0029860	CG15891	0.521891	2.23381	0.978003	0.533629	0.147231	1.10469e-40	3.9223e-36
FBgn0000117	arm	0.51967	4.5916	1	0.51967	0.146301	1.98119e-40	7.0344e-36
FBgn0040389	mRpL14	0.526532	2.58828	0.979695	0.537445	0.145486	3.3046e-40	1.17333e-35
FBgn0266019	rudhira	0.529914	4.7201	0.99154	0.534435	0.144749	5.24893e-40	1.86369e-35
FBgn0025800	Smox	0.519933	2.69091	0.986464	0.527067	0.138171	3.23858e-38	1.14989e-33
FBgn0030786	mRpL22	0.517688	2.01903	0.971235	0.53302	0.133857	4.81144e-37	1.70835e-32
FBgn0261710	nocte	0.520449	3.14556	0.988156	0.526687	0.13333	6.68629e-37	2.37403e-32
FBgn0023526	CG2865	0.536142	4.62571	0.966159	0.554921	0.121226	1.26449e-33	4.48969e-29
FBgn0260400	elav	0.519788	1.84914	0.893401	0.581808	0.11869	6.11688e-33	2.17186e-28
FBgn0011837	Tis11	0.521047	2.52246	0.940778	0.553846	0.117792	1.06884e-32	3.79502e-28
FBgn0026375	RhoGAPp190	0.518576	2.27899	0.967851	0.535801	0.114858	6.60667e-32	2.34576e-27
FBgn0029885	CG3224	0.518831	3.35805	0.986464	0.525951	0.109318	2.04767e-30	7.27047e-26
FBgn0014163	fax	0.520633	6.68363	1	0.520633	0.0614744	1.20285e-17	4.27083e-13

## Sheet: sexed dataset male markers
gene_id	gene_short_name	marker_score	mean_expression	fraction_expressing	specificity	pseudo_R2	marker_test_p_value	marker_test_q_value
FBgn0267507	pre-rRNA:CR45847	0.783558	2.2361	0.881466	0.888927	0.634286	2.61128e-302	9.2716e-298
FBgn0046214	vig2	0.494945	8.80587	0.998707	0.495586	0.0805553	5.51245e-33	1.95725e-28
FBgn0034753	CG2852	0.467652	32.5074	1	0.467652	0.0725217	8.5776e-30	3.04556e-25
FBgn0266521	stai	0.477217	16.5091	1	0.477217	0.0677619	6.58155e-28	2.33685e-23
FBgn0037728	p23	0.465744	30.9302	1	0.465744	0.0553626	5.10654e-23	1.81313e-18
FBgn0015221	Fer2LCH	0.476078	10.8018	0.998707	0.476694	0.047638	5.50602e-20	1.95497e-15
FBgn0032198	eEF1delta	0.469293	12.1455	0.999569	0.469496	0.0411732	1.8715e-17	6.64493e-13
FBgn0001233	Hsp83	0.467749	40.8653	1	0.467749	0.0363904	1.38622e-15	4.9219e-11
FBgn0002780	mod	0.470187	7.69591	0.999138	0.470593	0.0328237	3.4264e-14	1.21658e-09
FBgn0026566	CG1307	0.467891	5.83148	0.999138	0.468294	0.0303753	3.09563e-13	1.09914e-08
FBgn0027499	wde	0.483277	5.29583	0.9875	0.489394	0.0297067	5.6463e-13	2.00478e-08
FBgn0003462	Sod1	0.467906	9.37381	0.998707	0.468512	0.0293972	7.45756e-13	2.64788e-08
FBgn0035541	CG15019	0.476854	7.20586	0.996552	0.478504	0.0291255	9.52005e-13	3.38019e-08
FBgn0037637	IscU	0.484453	3.99695	0.9875	0.490585	0.0290451	1.02335e-12	3.6335e-08
FBgn0031670	SelT	0.468697	5.84413	0.997414	0.469912	0.0225044	3.66843e-10	1.30251e-05
FBgn0038964	Nop56	0.470107	7.73113	0.997845	0.471122	0.0224454	3.86855e-10	1.37357e-05
FBgn0039923	MED26	0.485662	10.9781	0.993534	0.488823	0.0190285	8.40183e-09	0.000298316
FBgn0028546	ics	0.465875	3.29217	0.982759	0.474048	0.016487	8.3366e-08	0.00295999
FBgn0026380	Prosbeta3	0.464787	6.95858	0.996983	0.466194	0.014882	3.5637e-07	0.0126533
FBgn0001226	Hsp27	0.467419	12.9959	0.998276	0.468226	0.01433	5.87791e-07	0.0208701
FBgn0025457	Bub3	0.465628	3.48637	0.984052	0.473175	0.0128615	2.23103e-06	0.0792148
FBgn0033485	RpLP0-like	0.464861	3.86267	0.977155	0.475729	0.0120701	4.58645e-06	0.162846
FBgn0001224	Hsp23	0.473267	39.35	0.997845	0.474289	0.0112131	1.00262e-05	0.355991
FBgn0011327	Uch-L5	0.465601	4.88598	0.991379	0.46965	0.0102987	2.31501e-05	0.821967
FBgn0052190	NUCB1	0.465362	4.14478	0.990948	0.469613	0.00989651	3.34804e-05	1

## Sheet: unsexed dataset female markers
gene_id	gene_short_name	marker_score	mean_expression	fraction_expressing	specificity	pseudo_R2	marker_test_p_value	marker_test_q_value
FBgn0278608	Dsp1	0.527422	15.8963	1	0.527422	0.467674	4.12061e-66	1.44296e-61
FBgn0029885	CG3224	0.536179	6.74616	0.996805	0.537898	0.369852	3.49555e-50	1.22407e-45
FBgn0030311	CG11699	0.522781	7.78777	1	0.522781	0.342924	4.45629e-46	1.5605e-41
FBgn0030400	Pits	0.552668	3.81964	0.99361	0.556222	0.302028	4.77878e-40	1.67343e-35
FBgn0023526	CG2865	0.569084	5.69245	0.984026	0.578322	0.283971	1.85279e-37	6.4881e-33
FBgn0003277	RpII215	0.541037	4.41799	0.990415	0.546273	0.265683	7.0132e-35	2.45588e-30
FBgn0265523	Smr	0.541981	5.46576	0.996805	0.543718	0.264999	8.73894e-35	3.0602e-30
FBgn0011837	Tis11	0.53591	7.53586	0.996805	0.537627	0.242425	1.15736e-31	4.05285e-27
FBgn0029860	CG15891	0.537628	2.64263	0.977636	0.549927	0.236193	8.2104e-31	2.87512e-26
FBgn0031040	CG14210	0.531483	4.50904	0.996805	0.533187	0.231288	3.80875e-30	1.33375e-25
FBgn0285926	Imp	0.525922	7.97125	1	0.525922	0.228223	9.90495e-30	3.46852e-25
FBgn0086558	Ubi-p5E	0.540793	4.65133	0.984026	0.549572	0.224191	3.46771e-29	1.21432e-24
FBgn0266019	rudhira	0.533437	4.58488	0.98722	0.540342	0.217924	2.41166e-28	8.44516e-24
FBgn0004647	N	0.539875	4.508	0.98722	0.546864	0.211108	1.9647e-27	6.87999e-23
FBgn0004656	fs(1)h	0.529203	4.76744	0.990415	0.534324	0.206551	7.93121e-27	2.77735e-22
FBgn0023519	mRpL16	0.522134	3.97571	0.990415	0.527187	0.200452	5.09275e-26	1.78338e-21
FBgn0262534	CG43088	0.527357	2.41325	0.926518	0.569182	0.193931	3.67993e-25	1.28864e-20
FBgn0263987	spoon	0.521473	3.90528	0.990415	0.52652	0.181677	1.47027e-23	5.14859e-19
FBgn0040389	mRpL14	0.524754	3.46999	0.977636	0.536758	0.180459	2.11737e-23	7.41461e-19
FBgn0030786	mRpL22	0.517841	2.03425	0.916933	0.564754	0.17751	5.10962e-23	1.78929e-18
FBgn0027334	l(1)G0004	0.530668	3.66132	0.974441	0.544587	0.175971	8.08579e-23	2.83148e-18
FBgn0040890	ksh	0.517262	2.57823	0.942492	0.548823	0.167906	8.88067e-22	3.10983e-17
FBgn0052767	CG32767	0.518868	2.55792	0.958466	0.541353	0.167241	1.08143e-21	3.78694e-17
FBgn0030433	mRpL49	0.520281	3.0823	0.964856	0.539231	0.164079	2.75392e-21	9.64368e-17
FBgn0030035	PIG-T	0.517679	3.19256	0.971246	0.533005	0.147327	3.75208e-19	1.3139e-14

## Sheet: unsexed dataset male markers
gene_id	gene_short_name	marker_score	mean_expression	fraction_expressing	specificity	pseudo_R2	marker_test_p_value	marker_test_q_value
FBgn0046214	vig2	0.480754	8.84558	1	0.480754	0.086412	1.323e-11	4.63287e-07
FBgn0001225	Hsp26	0.504012	52.1826	1	0.504012	0.0637297	7.25954e-09	0.000254215
FBgn0001226	Hsp27	0.484958	9.84534	1	0.484958	0.0524331	1.64424e-07	0.00575781
FBgn0001224	Hsp23	0.508319	20.8806	0.991935	0.512451	0.0409138	3.93795e-06	0.137899
FBgn0039802	dj-1beta	0.468658	4.14785	0.994624	0.471191	0.0408397	4.01925e-06	0.140746
FBgn0029512	Aos1	0.461299	2.56432	0.962366	0.479339	0.0383698	7.94427e-06	0.278193
FBgn0031977	baf	0.464164	7.74646	1	0.464164	0.0281435	0.000134561	1
FBgn0040070	Trx-2	0.472216	3.55738	0.983871	0.479958	0.0294079	9.47255e-05	1
FBgn0037607	CG8036	0.462609	3.31212	0.981183	0.471481	0.0253914	0.000289427	1
FBgn0003165	pum	0.46188	4.09262	0.989247	0.4669	0.0184041	0.00205791	1
FBgn0026250	eIF1A	0.460832	6.56576	1	0.460832	0.0249039	0.000331584	1
FBgn0027598	cindr	0.460504	5.91667	0.994624	0.462993	0.0149056	0.00557863	1
FBgn0039858	CycG	0.463041	5.64732	0.997312	0.464289	0.0185799	0.001958	1
FBgn0022224	ubl	0.46078	4.81001	0.994624	0.463271	0.0142474	0.00674142	1
FBgn0040752	Prosap	0.460684	4.74085	0.983871	0.468236	0.0172556	0.00285075	1
FBgn0005624	Psc	0.461092	4.05836	0.986559	0.467373	0.0147933	0.00576139	1
FBgn0035209	msd1	0.467723	2.82669	0.97043	0.481975	0.0318669	4.79183e-05	1
FBgn0013686	mt:lrRNA	0.466934	40.9158	1	0.466934	0.00911491	0.030389	1
FBgn0086707	ncm	0.460894	3.22193	0.959677	0.480259	0.0242409	0.000399002	1
FBgn0263106	DnaJ-1	0.464545	3.86689	0.935484	0.496583	0.0179745	0.00232435	1
FBgn0263852	Dad1	0.46097	4.58172	1	0.46097	0.0199893	0.00131498	1
FBgn0267795	Frl	0.466969	5.88149	0.997312	0.468227	0.030478	7.04031e-05	1
FBgn0010333	Rac1	0.462521	5.19763	0.997312	0.463767	0.0209211	0.00101156	1
FBgn0011455	ND-SGDH	0.460726	9.00195	1	0.460726	0.0295907	9.00427e-05	1
FBgn0000579	Eno	0.463052	13.2778	1	0.463052	0.013581	0.00817152	1
