# Supplementary material for: Trajectory mapping of the early Drosophila germline reveals controls of zygotic activation and sex differentiation
Source: HighWire-hosted journal article supplement (doi:10.1101/gr.271148.120), 2021-04-15
Supplement: SupplementalTable_S5.xlsx [file SupplementalTable_S5.xlsx]

## Sheet: Maternal
Table S5. Top 2000 maternally- and zygotically-biased germline genes from the unsexed dataset.
gene_id	gene_short_name	marker_score	mean_expression	fraction_expressing	specificity	pseudo_R2	marker_test_p_value	marker_test_q_value
FBgn0016053	pgc	0.539397	25.8532	0.956195	0.564108	0.561282	1.04834e-289	9.17768e-285
FBgn0260780	wisp	0.539306	16.2921	0.997497	0.540659	0.736735	0	0
FBgn0011761	dhd	0.498439	7.88925	0.924906	0.538908	0.522691	2.12292e-266	1.85851e-261
FBgn0002962	nos	0.492625	4.5987	0.929287	0.530111	0.544286	2.32128e-279	2.03217e-274
FBgn0250848	26-29-p	0.49236	4.98656	0.886733	0.555251	0.450628	1.48293e-224	1.29823e-219
FBgn0087040	alphaTub67C	0.487731	3.88084	0.957447	0.509408	0.556363	1.06699e-286	9.34095e-282
FBgn0015614	CanB2	0.484031	2.22365	0.854819	0.566238	0.465528	4.90427e-233	4.29345e-228
FBgn0040309	Jafrac1	0.466777	10.5618	0.999374	0.46707	0.618267	0	0
FBgn0046692	Stlk	0.466184	2.61519	0.901126	0.517335	0.495932	1.2946e-250	1.13336e-245
FBgn0010431	mtrm	0.465368	2.78388	0.842303	0.552495	0.469283	3.46124e-235	3.03014e-230
FBgn0022981	rpk	0.461257	2.39492	0.904881	0.509743	0.478543	1.62544e-240	1.42299e-235
FBgn0038252	BigH1	0.458088	9.47909	0.996245	0.459814	0.575898	1.04553e-298	9.15313e-294
FBgn0262559	Mdh2	0.456297	4.60075	0.962453	0.474098	0.494417	9.92055e-250	8.68495e-245
FBgn0037756	CG8507	0.454351	4.09408	0.962453	0.472076	0.486698	3.09132e-245	2.7063e-240
FBgn0000405	CycB	0.452563	24.28	0.999374	0.452846	0.581497	3.51387e-302	3.07621e-297
FBgn0033879	Echs1	0.449596	4.847	0.982478	0.457615	0.525354	5.49389e-268	4.80963e-263
FBgn0001248	Idh	0.448436	3.15703	0.941802	0.476146	0.490659	1.54058e-247	1.3487e-242
FBgn0039923	MED26	0.445496	22.6747	1	0.445496	0.648596	0	0
FBgn0033010	Atf6	0.444577	2.66007	0.928661	0.478729	0.485309	1.97865e-244	1.73221e-239
FBgn0267385	PyK	0.442155	6.597	0.984981	0.448897	0.505082	5.60155e-256	4.90388e-251
FBgn0027547	CG1927	0.437702	2.05246	0.891114	0.491186	0.45328	4.65411e-226	4.07444e-221
FBgn0004795	retn	0.437525	4.2136	0.963079	0.454298	0.500714	2.0567e-253	1.80054e-248
FBgn0003401	shu	0.434213	3.89058	0.932416	0.465686	0.423376	2.89794e-209	2.537e-204
FBgn0032350	CG6287	0.433557	3.95907	0.968711	0.447561	0.485539	1.45409e-244	1.27299e-239
FBgn0037890	CG17734	0.432359	7.76838	0.986859	0.438116	0.472287	6.53038e-237	5.71702e-232
FBgn0003114	plu	0.43186	1.92904	0.869837	0.496484	0.405394	2.50878e-199	2.19631e-194
FBgn0017558	Pdk	0.429358	1.92005	0.862954	0.497545	0.412867	1.92418e-203	1.68452e-198
FBgn0030048	CG12112	0.428973	3.06212	0.953692	0.449802	0.48365	1.81124e-243	1.58565e-238
FBgn0034897	Sesn	0.428914	1.85637	0.830413	0.516507	0.430309	3.96523e-213	3.47136e-208
FBgn0024732	Drep1	0.427707	1.38025	0.795995	0.537324	0.404905	4.65705e-199	4.07702e-194
FBgn0031030	Tao	0.425494	17.4684	1	0.425494	0.598216	1.21473404100249e-312	1.06344e-307
FBgn0000579	Eno	0.417676	26.8995	1	0.417676	0.655541	0	0
FBgn0004419	me31B	0.417646	16.8403	0.999374	0.417908	0.665599	0	0
FBgn0027515	CG7115	0.417295	3.65096	0.935544	0.446045	0.402931	5.64535e-198	4.94222e-193
FBgn0261987	Pxt	0.414649	1.52238	0.737797	0.562009	0.354153	1.21237e-171	1.06137e-166
FBgn0050000	GstT1	0.413896	2.15324	0.897372	0.461232	0.403431	3.00244e-198	2.62849e-193
FBgn0000479	dnc	0.412462	4.93693	0.980601	0.420621	0.464721	1.41997e-232	1.24312e-227
FBgn0033631	Sod3	0.411126	6.10711	0.994368	0.413454	0.484418	6.49986e-244	5.6903e-239
FBgn0016926	Pino	0.410523	2.8917	0.895494	0.458431	0.413409	9.65454e-204	8.45207e-199
FBgn0014869	Pglym78	0.40419	6.14969	0.988736	0.408795	0.464138	3.0573e-232	2.67651e-227
FBgn0032876	Cen	0.404089	2.79573	0.925532	0.436602	0.457036	3.42546e-228	2.99882e-223
FBgn0001091	Gapdh1	0.401402	6.86903	0.994368	0.403675	0.47681	1.6252e-239	1.42278e-234
FBgn0031126	Cyp6v1	0.400782	2.09829	0.777847	0.515245	0.403274	3.65794e-198	3.20234e-193
FBgn0030711	Rrp47	0.400725	5.95839	0.992491	0.403757	0.464296	2.48363e-232	2.17429e-227
FBgn0004066	Prosalpha4	0.399724	10.6479	0.999374	0.399974	0.562569	1.70574e-290	1.49329e-285
FBgn0031381	Npc2a	0.399717	3.15872	0.961827	0.415581	0.452223	1.85177e-225	1.62113e-220
FBgn0035601	Uev1A	0.398803	11.0829	1	0.398803	0.612899	6.12641400843146e-322	5.36336914368132e-317
FBgn0004052	Z600	0.396986	3.04858	0.600125	0.661505	0.29173	4.1005e-139	3.58979e-134
FBgn0039849	CG11334	0.39633	1.80719	0.854193	0.463982	0.39547	6.81367e-194	5.96503e-189
FBgn0035499	Chd64	0.395173	6.08538	0.996245	0.396662	0.475058	1.66237e-238	1.45532e-233
FBgn0011770	Gip	0.394389	2.00243	0.880476	0.447927	0.35527	3.08928e-172	2.70451e-167
FBgn0030551	CG11674	0.39344	5.0875	0.990613	0.397168	0.460887	2.1946e-230	1.92126e-225
FBgn0259682	Jabba	0.391736	13.275	0.998123	0.392473	0.468976	5.19602e-235	4.54886e-230
FBgn0010288	Uch	0.39086	3.32216	0.962453	0.406108	0.433712	4.9637e-215	4.34547e-210
FBgn0038149	GILT1	0.3899	4.81978	0.98373	0.396349	0.448088	4.0559e-223	3.55074e-218
FBgn0000183	BicD	0.389461	1.58779	0.816646	0.476904	0.358731	4.43989e-174	3.8869e-169
FBgn0036927	Gabat	0.389192	3.62225	0.973091	0.399954	0.418376	1.72526e-206	1.51038e-201
FBgn0037076	ebd2	0.387878	1.34574	0.737797	0.525724	0.359518	1.68899e-174	1.47863e-169
FBgn0040064	yip2	0.386708	2.02696	0.89174	0.433656	0.382256	1.03397e-186	9.05187e-182
FBgn0032014	CG7840	0.385937	2.50709	0.869837	0.443689	0.333907	5.93807e-161	5.19848e-156
FBgn0267727	Pen	0.385752	36.816	1	0.385752	0.595847	3.75544389934786e-311	3.2877e-306
FBgn0029825	CG12728	0.38548	2.07445	0.824781	0.467372	0.345781	3.31842e-167	2.90511e-162
FBgn0250843	Prosalpha6	0.385468	5.81808	0.994368	0.387652	0.460737	2.67151e-230	2.33877e-225
FBgn0024188	san	0.384384	4.39636	0.975594	0.393999	0.401646	2.85779e-197	2.50185e-192
FBgn0032596	Prosbeta4	0.384067	10.127	0.998748	0.384548	0.509321	1.78515e-258	1.56281e-253
FBgn0015321	Ubc4	0.383925	5.30345	0.992491	0.38683	0.460999	1.89371e-230	1.65785e-225
FBgn0030608	Lsd-2	0.383495	3.46605	0.903004	0.424689	0.345223	6.53665e-167	5.72251e-162
FBgn0264895	RapGAP1	0.383094	21.2056	1	0.383094	0.518647	5.39774e-264	4.72546e-259
FBgn0037024	tzn	0.375541	4.05582	0.976846	0.384442	0.395736	4.88021e-194	4.27238e-189
FBgn0037844	CG4570	0.374754	4.35929	0.975594	0.384128	0.418708	1.12936e-206	9.887e-202
FBgn0029134	Prosbeta5	0.374612	11.9222	1	0.374612	0.508875	3.27009e-258	2.8628e-253
FBgn0035965	Use1	0.374515	1.97253	0.865457	0.432737	0.336087	4.25745e-162	3.72719e-157
FBgn0051694	CG31694	0.37372	4.33099	0.979975	0.381356	0.401838	2.24257e-197	1.96326e-192
FBgn0286778	CG46385	0.37367	2.12882	0.823529	0.453742	0.332575	2.96523e-160	2.59591e-155
FBgn0086251	del	0.373556	1.70547	0.798498	0.467823	0.337077	1.28535e-162	1.12526e-157
FBgn0250816	AGO3	0.373364	1.94099	0.871715	0.42831	0.33813	3.58899e-163	3.14198e-158
FBgn0030432	CG4404	0.372347	1.87657	0.775344	0.480235	0.289468	5.85976e-138	5.12992e-133
FBgn0086687	Desat1	0.372161	3.82883	0.968085	0.38443	0.365863	6.8798e-178	6.02292e-173
FBgn0086134	Prosalpha2	0.371495	8.14337	0.998748	0.37196	0.481577	2.87077e-242	2.51322e-237
FBgn0026777	Rad23	0.370565	10.0981	1	0.370565	0.539095	3.16086e-276	2.76718e-271
FBgn0030813	CG4949	0.370445	2.62763	0.944931	0.392034	0.396782	1.30984e-194	1.1467e-189
FBgn0029924	CG4586	0.369948	1.19917	0.720901	0.513175	0.353093	4.43661e-171	3.88403e-166
FBgn0026199	myo	0.369321	1.60341	0.804756	0.458923	0.342073	3.00789e-165	2.63325e-160
FBgn0086856	CG11555	0.368186	3.26546	0.953692	0.386064	0.371354	7.81493e-181	6.84158e-176
FBgn0000228	Bsg25D	0.36796	2.41568	0.809762	0.454405	0.318807	4.55255e-153	3.98553e-148
FBgn0024177	zpg	0.367941	6.89799	0.991239	0.371193	0.404953	4.38416e-199	3.83812e-194
FBgn0263594	lost	0.36767	11.7716	1	0.36767	0.547216	3.9015e-281	3.41557e-276
FBgn0050377	CG30377	0.367485	1.36915	0.708385	0.518763	0.350554	9.85827e-170	8.63042e-165
FBgn0003231	ref(2)P	0.367112	3.647	0.964956	0.380444	0.359356	2.06116e-174	1.80444e-169
FBgn0014427	CG11899	0.366344	1.09063	0.709637	0.516241	0.312467	8.83595e-150	7.73543e-145
FBgn0037913	fabp	0.365897	26.0496	1	0.365897	0.45773	1.38009e-228	1.2082e-223
FBgn0029996	UbcE2H	0.365524	1.70598	0.81602	0.447936	0.317771	1.57055e-152	1.37494e-147
FBgn0038828	CG17270	0.36533	1.84201	0.86796	0.420906	0.373507	5.43157e-182	4.75507e-177
FBgn0033544	CG7220	0.365079	3.04365	0.954318	0.382554	0.345796	3.25877e-167	2.85289e-162
FBgn0011204	cue	0.364542	1.53436	0.79224	0.46014	0.340389	2.32312e-164	2.03378e-159
FBgn0036030	CG6767	0.364054	1.45023	0.782854	0.465035	0.34686	8.91659e-168	7.80603e-163
FBgn0001174	halo	0.363583	2.09271	0.588861	0.617434	0.293905	3.16488e-140	2.7707e-135
FBgn0019686	lok	0.363575	6.45143	0.989362	0.367485	0.389884	7.53248e-191	6.59431e-186
FBgn0003495	spz	0.362618	2.96071	0.94806	0.382485	0.358297	7.56231e-174	6.62042e-169
FBgn0003462	Sod1	0.362391	11.2135	0.998748	0.362845	0.448548	2.22837e-223	1.95082e-218
FBgn0261394	Prosalpha3	0.362255	9.67514	0.999374	0.362482	0.454323	1.19115e-226	1.04279e-221
FBgn0023175	Prosalpha7	0.361664	5.82444	0.992491	0.3644	0.399675	3.43142e-196	3.00403e-191
FBgn0051549	CG31549	0.361544	2.4304	0.936796	0.385937	0.367011	1.67141e-178	1.46323e-173
FBgn0038428	CG14894	0.361054	3.05847	0.956821	0.377347	0.379463	3.34677e-185	2.92993e-180
FBgn0001124	Got1	0.361011	1.43102	0.779725	0.462998	0.332608	2.84926e-160	2.49438e-155
FBgn0039914	mav	0.360935	2.91834	0.949937	0.379957	0.369718	5.90651e-180	5.17086e-175
FBgn0003721	Tm1	0.360909	9.41259	0.991239	0.364099	0.381785	1.85984e-186	1.6282e-181
FBgn0025352	Thiolase	0.360699	1.9636	0.809762	0.445438	0.286733	1.45349e-136	1.27246e-131
FBgn0010226	GstS1	0.358943	3.70652	0.977472	0.367215	0.378199	1.6096e-184	1.40913e-179
FBgn0034399	CG15083	0.358834	3.33068	0.968085	0.370664	0.366395	3.57225e-178	3.12733e-173
FBgn0016697	Prosalpha5	0.358539	10.0829	1	0.358539	0.489287	9.68279e-247	8.4768e-242
FBgn0035438	PHGPx	0.3581	4.68295	0.989362	0.36195	0.39513	1.04468e-193	9.14563e-189
FBgn0026380	Prosbeta3	0.35731	12.1409	1	0.35731	0.462954	1.45096e-231	1.27024e-226
FBgn0040056	CG17698	0.356562	0.997415	0.665207	0.536017	0.30456	1.07042e-145	9.37096e-141
FBgn0040493	grsm	0.356502	1.38185	0.790363	0.451061	0.313708	2.01155e-150	1.76101e-145
FBgn0023174	Prosbeta2	0.35618	7.68127	0.999374	0.356403	0.435421	5.47279e-216	4.79115e-211
FBgn0000384	cta	0.356064	1.54984	0.791615	0.449795	0.360191	7.39164e-175	6.47101e-170
FBgn0051673	CG31673	0.355641	1.70252	0.846058	0.42035	0.308499	9.95739e-148	8.7172e-143
FBgn0037156	CG11523	0.355628	2.8021	0.946183	0.375856	0.354283	1.03397e-171	9.05192e-167
FBgn0000114	bru1	0.354728	4.9013	0.958698	0.37001	0.306393	1.21513e-146	1.06379e-141
FBgn0002284	Prosbeta6	0.35469	8.09814	0.999374	0.354912	0.442863	3.60413e-220	3.15524e-215
FBgn0086691	UK114	0.354366	1.97597	0.832916	0.425453	0.316134	1.11181e-151	9.73334e-147
FBgn0266410	CG45050	0.353751	30.8673	1	0.353751	0.500572	2.49221e-253	2.1818e-248
FBgn0036349	SNCF	0.35341	4.54833	0.622653	0.567587	0.302568	1.13521e-144	9.93818e-140
FBgn0037843	CG4511	0.352482	3.15498	0.960576	0.366949	0.380693	7.23907e-186	6.33744e-181
FBgn0003165	pum	0.351721	19.1314	0.998748	0.352162	0.372905	1.14478e-181	1.00219e-176
FBgn0037298	Sccpdh1	0.350773	1.65236	0.84418	0.415519	0.291869	3.48076e-139	3.04723e-134
FBgn0026320	Tom	0.349014	17.0042	0.914268	0.381742	0.284035	3.43794e-135	3.00974e-130
FBgn0264493	rdx	0.34851	8.30448	0.998748	0.348947	0.431266	1.15849e-213	1.0142e-208
FBgn0032704	Jwa	0.348193	2.74465	0.934293	0.372681	0.341443	6.46221e-165	5.65734e-160
FBgn0054015	CG34015	0.347953	1.94398	0.864205	0.402628	0.307874	2.09278e-147	1.83213e-142
FBgn0034398	CG15098	0.347917	2.10107	0.916145	0.379762	0.319058	3.37032e-153	2.95055e-148
FBgn0032455	Pih1D1	0.346788	3.1625	0.942428	0.367973	0.344095	2.57939e-166	2.25813e-161
FBgn0026076	UBL3	0.346715	3.11104	0.935544	0.370603	0.331737	8.14829e-160	7.13342e-155
FBgn0029079	icln	0.34617	2.64543	0.943054	0.367073	0.335932	5.13184e-162	4.49267e-157
FBgn0262512	Vha14-1	0.34542	6.75439	0.99562	0.346939	0.358847	3.85184e-174	3.37209e-169
FBgn0259979	CG17337	0.345267	4.01402	0.976846	0.353451	0.353525	2.61454e-171	2.2889e-166
FBgn0026084	cib	0.344733	16.6156	1	0.344733	0.502041	3.42596e-254	2.99926e-249
FBgn0031043	Naa20A	0.344658	3.22548	0.970588	0.355102	0.338369	2.68884e-163	2.35394e-158
FBgn0021765	scu	0.344426	7.49514	0.998748	0.344858	0.392683	2.25692e-192	1.97582e-187
FBgn0261278	grp	0.344144	2.87356	0.957447	0.35944	0.345047	8.10408e-167	7.09472e-162
FBgn0027552	CG10863	0.344011	0.853401	0.561952	0.612171	0.271164	1.14362e-128	1.00118e-123
FBgn0044823	Spec2	0.343434	1.28822	0.753442	0.45582	0.266755	1.9079e-126	1.67027e-121
FBgn0001150	gt	0.343306	1.67606	0.562578	0.610237	0.241754	5.93059e-114	5.19193e-109
FBgn0003411	sisA	0.343011	2.58261	0.52816	0.649445	0.248924	1.62003e-117	1.41826e-112
FBgn0033635	Prip	0.342872	1.16945	0.686483	0.499461	0.343425	5.82056e-166	5.09561e-161
FBgn0035811	Mcad	0.342455	3.22684	0.96433	0.355122	0.328783	2.86662e-158	2.50958e-153
FBgn0026415	Idgf4	0.34243	4.17047	0.976846	0.350547	0.354963	4.5015e-172	3.94084e-167
FBgn0037624	CG8223	0.342403	4.07984	0.983104	0.348288	0.368588	2.38365e-179	2.08676e-174
FBgn0015268	Nap1	0.342071	15.6604	1	0.342071	0.472707	3.74249e-237	3.27636e-232
FBgn0259916	CG42445	0.342061	1.49262	0.817897	0.41822	0.31711	3.46165e-152	3.0305e-147
FBgn0015359	CG2034	0.341734	1.4971	0.817897	0.41782	0.269407	8.80178e-128	7.70552e-123
FBgn0022361	Pur-alpha	0.341621	1.09783	0.722778	0.472649	0.287294	7.52507e-137	6.58782e-132
FBgn0010590	Prosbeta1	0.341414	4.57762	0.959324	0.35589	0.29757	4.19489e-142	3.67242e-137
FBgn0033475	CG12129	0.340327	2.01472	0.866083	0.39295	0.281326	8.1919e-134	7.1716e-129
FBgn0027338	Kap-alpha3	0.340016	6.95238	0.997497	0.34087	0.427656	1.20003e-211	1.05057e-206
FBgn0003714	tko	0.339951	4.03985	0.979975	0.346897	0.324151	7.5208e-156	6.58409e-151
FBgn0001092	Gapdh2	0.339808	5.20195	0.911139	0.372949	0.256918	1.65362e-121	1.44766e-116
FBgn0032988	Tif-IA	0.339618	3.28985	0.944931	0.359411	0.325576	1.35821e-156	1.18905e-151
FBgn0038771	CG4390	0.339331	2.18323	0.897372	0.378139	0.30475	8.54787e-146	7.48323e-141
FBgn0014032	Sptr	0.339112	1.52229	0.840426	0.4035	0.275549	6.94981e-131	6.08421e-126
FBgn0031213	galectin	0.338055	0.765281	0.557572	0.606299	0.274433	2.54885e-130	2.23139e-125
FBgn0000318	cl	0.337878	5.10467	0.994994	0.339578	0.334893	1.80289e-161	1.57834e-156
FBgn0038519	Prx3	0.337833	4.43709	0.989362	0.341466	0.344024	2.81295e-166	2.4626e-161
FBgn0052473	CG32473	0.337524	1.67564	0.843554	0.400121	0.311877	1.78651e-149	1.564e-144
FBgn0028700	RfC38	0.337123	2.6025	0.935544	0.36035	0.309281	3.92764e-148	3.43845e-143
FBgn0283657	Tlk	0.336838	6.4041	0.983104	0.342628	0.311854	1.83524e-149	1.60666e-144
FBgn0000064	Ald1	0.336101	4.79635	0.989987	0.339501	0.376172	1.99532e-183	1.7468e-178
FBgn0015218	eIF4E1	0.336074	13.0112	1	0.336074	0.416585	1.69335e-205	1.48244e-200
FBgn0032859	Arpc2	0.335073	3.52385	0.929912	0.360327	0.277369	8.32038e-132	7.28407e-127
FBgn0033995	GPHR	0.334838	1.57192	0.801001	0.418025	0.300638	1.115e-143	9.76128e-139
FBgn0267861	Maf1	0.334806	3.11971	0.940551	0.355969	0.378368	1.30567e-184	1.14305e-179
FBgn0033683	CG18343	0.334191	2.55719	0.929912	0.359379	0.289089	9.15177e-138	8.01192e-133
FBgn0026206	mei-P26	0.334102	4.87873	0.979349	0.341147	0.307782	2.33367e-147	2.04301e-142
FBgn0041775	tral	0.334044	10.993	1	0.334044	0.433188	9.74477e-215	8.53106e-210
FBgn0030870	CG6398	0.333921	2.95071	0.94806	0.352215	0.363873	7.98787e-177	6.99298e-172
FBgn0039993	CG17691	0.332596	2.65172	0.93617	0.355273	0.312233	1.16775e-149	1.02231e-144
FBgn0062449	CG13197	0.330931	1.98731	0.804756	0.41122	0.298411	1.5527e-142	1.35931e-137
FBgn0011661	Moe	0.330424	2.56749	0.893617	0.36976	0.270085	4.0059e-128	3.50697e-123
FBgn0024558	Dph5	0.329699	5.25578	0.993116	0.331984	0.337625	6.62065e-163	5.79604e-158
FBgn0267376	SelR	0.328487	1.57847	0.815394	0.402857	0.288081	2.98809e-137	2.61592e-132
FBgn0005655	PCNA	0.327434	8.44651	0.997497	0.328256	0.364894	2.27123e-177	1.98835e-172
FBgn0000150	awd	0.326893	59.8124	1	0.326893	0.404519	7.58444e-199	6.6398e-194
FBgn0266521	stai	0.326743	9.39806	0.996871	0.327768	0.364849	2.40104e-177	2.10199e-172
FBgn0001941	ifc	0.326266	2.47457	0.878598	0.371348	0.307143	4.98471e-147	4.36386e-142
FBgn0028325	Pdha	0.325898	1.74685	0.8398	0.388067	0.260582	2.41248e-123	2.11201e-118
FBgn0003028	ovo	0.32536	3.76551	0.966208	0.336739	0.302743	9.2208e-145	8.07235e-140
FBgn0037537	CG2767	0.325067	1.08274	0.723404	0.449357	0.258286	3.41647e-122	2.99095e-117
FBgn0004888	Scsalpha1	0.323977	3.82297	0.971214	0.33358	0.289506	5.60468e-138	4.90662e-133
FBgn0026252	msk	0.322941	1.89229	0.871715	0.370466	0.269665	6.52701e-128	5.71407e-123
FBgn0036428	Gbs-70E	0.322167	1.68866	0.837922	0.384483	0.331567	1.00017e-159	8.75598e-155
FBgn0016041	Tom40	0.322035	2.57784	0.928661	0.346774	0.281769	4.87443e-134	4.26732e-129
FBgn0015790	Rab11	0.321895	3.69821	0.976846	0.329525	0.306702	8.41999e-147	7.37128e-142
FBgn0028408	Drep2	0.321752	4.90461	0.987484	0.32583	0.307942	1.93027e-147	1.68985e-142
FBgn0020653	Trxr-1	0.321192	2.03511	0.846058	0.379633	0.270196	3.52055e-128	3.08206e-123
FBgn0039259	CG11781	0.320721	4.3912	0.980601	0.327066	0.299951	2.51506e-143	2.20181e-138
FBgn0022338	dnk	0.320158	2.63579	0.807885	0.396291	0.29167	4.39697e-139	3.84933e-134
FBgn0011768	Fdh	0.320044	3.75843	0.969337	0.330168	0.282828	1.41183e-134	1.23599e-129
FBgn0005695	gcl	0.319943	3.79281	0.824155	0.388207	0.229703	5.36321e-108	4.69522e-103
FBgn0028708	Mst85C	0.319538	2.73134	0.946183	0.337713	0.265227	1.12088e-125	9.81276e-121
FBgn0027513	ana2	0.319308	1.41655	0.762203	0.418928	0.265033	1.40322e-125	1.22845e-120
FBgn0032884	Pomp	0.318625	10.2728	0.999374	0.318824	0.348854	7.84895e-169	6.87137e-164
FBgn0046687	Tre1	0.31845	2.5215	0.907384	0.350954	0.402108	1.59589e-197	1.39712e-192
FBgn0028743	Dhit	0.317856	2.22288	0.873592	0.363849	0.253408	9.39963e-120	8.22891e-115
FBgn0031434	insv	0.317543	2.31869	0.87985	0.360906	0.386566	4.77852e-189	4.18335e-184
FBgn0024921	Tnpo	0.316926	2.8184	0.949937	0.333628	0.329539	1.15324e-158	1.00961e-153
FBgn0035640	mad2	0.316443	3.63393	0.969962	0.326243	0.320756	4.41152e-154	3.86207e-149
FBgn0032214	CG4968	0.3162	2.71946	0.929287	0.340261	0.245522	7.9859e-116	6.99126e-111
FBgn0013763	Idgf6	0.316097	4.62076	0.986859	0.320307	0.308636	8.4584e-148	7.4049e-143
FBgn0015623	Cpr	0.315512	1.35818	0.778473	0.405296	0.23218	3.22292e-109	2.82151e-104
FBgn0029879	APC7	0.315306	0.839326	0.620776	0.507922	0.262604	2.33172e-124	2.0413e-119
FBgn0286222	Fum1	0.315246	2.85815	0.946809	0.332956	0.279421	7.58481e-133	6.64013e-128
FBgn0250746	Prosbeta7	0.315193	5.67056	0.992491	0.317578	0.328235	5.54574e-158	4.85502e-153
FBgn0050440	CG30440	0.315169	0.932234	0.652691	0.482877	0.268321	3.10645e-127	2.71955e-122
FBgn0027526	Ublcp1	0.315095	2.19979	0.913016	0.345115	0.280574	1.97229e-133	1.72664e-128
FBgn0010247	Parp	0.314802	2.42008	0.921151	0.341748	0.248087	4.23079e-117	3.70384e-112
FBgn0028837	CSN6	0.314474	2.98261	0.957447	0.328451	0.297388	5.19975e-142	4.55212e-137
FBgn0039544	CG12877	0.314285	1.98708	0.887985	0.35393	0.277693	5.7047e-132	4.99418e-127
FBgn0030740	CG9917	0.312785	1.48407	0.617021	0.506927	0.237809	5.34316e-112	4.67767e-107
FBgn0052267	CG32267	0.312613	7.3803	0.99562	0.313988	0.296197	2.12018e-141	1.85611e-136
FBgn0037891	CG5214	0.311994	1.84496	0.876095	0.356119	0.240647	2.09949e-113	1.838e-108
FBgn0033458	CG18446	0.31164	2.19421	0.810388	0.384556	0.240587	2.24862e-113	1.96855e-108
FBgn0250906	Pgk	0.311521	2.46574	0.923655	0.33727	0.257407	9.4065e-122	8.23492e-117
FBgn0031090	Rab35	0.31151	2.67663	0.938673	0.331862	0.310456	9.6963e-149	8.48862e-144
FBgn0001098	Gdh	0.311119	2.55528	0.936796	0.332109	0.288836	1.23103e-137	1.0777e-132
FBgn0036290	CG10638	0.310787	1.95771	0.881727	0.352476	0.243601	7.18674e-115	6.29163e-110
FBgn0005649	Rox8	0.310499	5.45025	0.989362	0.313838	0.330684	2.90168e-159	2.54028e-154
FBgn0038381	EndoU	0.31041	1.30005	0.774718	0.400674	0.25758	7.70427e-122	6.74471e-117
FBgn0263706	CG43658	0.310353	7.83412	0.994368	0.312111	0.302514	1.2095e-144	1.05886e-139
FBgn0027657	glob1	0.310333	1.69984	0.857947	0.361716	0.276468	2.38173e-131	2.08509e-126
FBgn0026262	bip2	0.310315	8.21029	0.990613	0.313255	0.265432	8.84305e-126	7.74164e-121
FBgn0262124	uex	0.310261	2.99224	0.933667	0.332304	0.282706	1.6295e-134	1.42654e-129
FBgn0011211	blw	0.309691	12.9112	0.999374	0.309885	0.323733	1.24251e-155	1.08775e-150
FBgn0035165	CG13887	0.309547	4.4242	0.986233	0.313868	0.268839	1.70205e-127	1.49006e-122
FBgn0039907	lgs	0.309497	3.64024	0.966834	0.320114	0.268891	1.60199e-127	1.40247e-122
FBgn0028693	Rpn12	0.308798	4.62576	0.983104	0.314105	0.281254	8.90701e-134	7.79764e-129
FBgn0037834	Art1	0.308623	3.12681	0.941176	0.327912	0.293808	3.54879e-140	3.10679e-135
FBgn0000996	dup	0.308524	1.77737	0.848561	0.363585	0.29373	3.8865e-140	3.40244e-135
FBgn0036974	eRF1	0.308508	3.7016	0.981227	0.314411	0.272838	1.63329e-129	1.42986e-124
FBgn0083961	CG34125	0.308393	2.24376	0.908636	0.339402	0.246753	1.95142e-116	1.70837e-111
FBgn0010551	Phb2	0.308392	5.09141	0.990613	0.311314	0.28096	1.25651e-133	1.10001e-128
FBgn0031049	Sec61gamma	0.307769	21.0279	1	0.307769	0.350774	7.54448e-170	6.60481e-165
FBgn0023477	Taldo	0.307709	3.59577	0.961827	0.319921	0.24814	3.98219e-117	3.4862e-112
FBgn0039977	CG17454	0.307545	4.43881	0.985607	0.312036	0.315228	3.28122e-151	2.87255e-146
FBgn0002031	l(2)37Cc	0.307254	3.83989	0.975594	0.31494	0.256357	3.15503e-121	2.76207e-116
FBgn0031247	CG11562	0.307043	1.52907	0.838548	0.36616	0.202473	1.0821e-94	9.47323e-90
FBgn0003882	tub	0.306967	1.63163	0.8398	0.365524	0.261307	1.0448e-123	9.14667e-119
FBgn0261524	lic	0.306772	1.80983	0.886733	0.345958	0.275295	9.34614e-131	8.18208e-126
FBgn0034098	krimp	0.30655	1.70052	0.852941	0.359404	0.25475	2.00712e-120	1.75713e-115
FBgn0031663	CG8891	0.306331	2.45876	0.933041	0.328315	0.237024	1.30639e-111	1.14368e-106
FBgn0266569	CG42259	0.306305	1.89264	0.86796	0.352903	0.227167	9.48741e-107	8.30576e-102
FBgn0028690	Rpn5	0.306033	3.2822	0.939925	0.325593	0.248225	3.60943e-117	3.15988e-112
FBgn0012036	Aldh	0.30595	1.32435	0.750313	0.407764	0.239317	9.57246e-113	8.38021e-108
FBgn0032721	CG10602	0.305939	1.63075	0.830413	0.368417	0.255926	5.1836e-121	4.53798e-116
FBgn0010621	CCT5	0.305406	4.59427	0.980601	0.311448	0.240188	3.54602e-113	3.10437e-108
FBgn0010113	hdc	0.305243	3.58631	0.971214	0.31429	0.290216	2.43163e-138	2.12877e-133
FBgn0264492	CkIIalpha	0.305213	8.98717	1	0.305213	0.337006	1.39987e-162	1.22552e-157
FBgn0260747	Chchd2	0.30513	3.98716	0.968711	0.314986	0.260494	2.67132e-123	2.33861e-118
FBgn0026316	Ubc10	0.304805	2.42234	0.922403	0.330447	0.252971	1.55261e-119	1.35924e-114
FBgn0039970	CG17508	0.304639	1.1638	0.658323	0.462751	0.237955	4.52222e-112	3.95897e-107
FBgn0030802	DENR	0.304476	2.97994	0.949937	0.320522	0.281947	3.95804e-134	3.46507e-129
FBgn0260859	Bet3	0.30437	1.9315	0.889862	0.342041	0.259506	8.3609e-123	7.31955e-118
FBgn0036661	CG9705	0.30398	6.95818	0.997497	0.304742	0.29566	3.99771e-141	3.4998e-136
FBgn0001225	Hsp26	0.303836	60.0667	0.998748	0.304217	0.205084	5.85095e-96	5.12221e-91
FBgn0028479	Mtpalpha	0.303578	2.39449	0.916145	0.331365	0.242865	1.66755e-114	1.45985e-109
FBgn0029942	CG2059	0.303529	1.11654	0.715269	0.424356	0.248716	2.05532e-117	1.79933e-112
FBgn0262736	Vha16-1	0.303512	8.08084	0.997497	0.304273	0.277454	7.53966e-132	6.60059e-127
FBgn0004106	Cdk1	0.302845	6.45794	0.996245	0.303986	0.298035	2.42074e-142	2.11924e-137
FBgn0004507	GlyP	0.302704	0.709697	0.525657	0.575858	0.256248	3.57822e-121	3.13255e-116
FBgn0085229	CG34200	0.302601	3.41934	0.965582	0.313387	0.261758	6.20484e-124	5.43203e-119
FBgn0267487	Ptp61F	0.302479	2.72579	0.94368	0.320532	0.245372	9.47736e-116	8.29696e-111
FBgn0039830	ATPsynC	0.302399	39.3091	1	0.302399	0.401838	2.24141e-197	1.96224e-192
FBgn0042693	wrd	0.302378	1.49716	0.81602	0.370552	0.26292	1.61861e-124	1.41701e-119
FBgn0031145	Ntf-2	0.301768	14.0344	1	0.301768	0.351464	3.2474e-170	2.84293e-165
FBgn0030336	CG1578	0.30173	1.20775	0.739675	0.407923	0.232155	3.31593e-109	2.90293e-104
FBgn0040339	MED22	0.30171	4.44791	0.980601	0.307678	0.276286	2.94282e-131	2.57629e-126
FBgn0029980	CG10778	0.301472	1.6342	0.785982	0.38356	0.235315	9.13239e-111	7.99495e-106
FBgn0037106	CG11307	0.30111	1.14316	0.742178	0.405712	0.231185	9.97347e-109	8.73128e-104
FBgn0031896	CG4502	0.30109	1.67525	0.849812	0.354302	0.220851	1.19496e-103	1.04613e-98
FBgn0002638	Rcc1	0.300876	4.37936	0.981227	0.306632	0.31394	1.52686e-150	1.33669e-145
FBgn0037728	p23	0.300673	41.7928	1	0.300673	0.332509	3.21161e-160	2.81161e-155
FBgn0034091	mrj	0.300557	2.03955	0.909887	0.330323	0.248211	3.6683e-117	3.21142e-112
FBgn0083953	CG34117	0.300264	3.61611	0.972466	0.308766	0.271701	6.12795e-129	5.36471e-124
FBgn0002413	dco	0.300045	3.4214	0.960576	0.31236	0.256745	2.01742e-121	1.76615e-116
FBgn0037481	MAGE	0.299383	1.47882	0.834168	0.358901	0.233168	1.04971e-109	9.18966e-105
FBgn0040660	CG13551	0.299378	9.76926	1	0.299378	0.276056	3.85055e-131	3.37096e-126
FBgn0041087	wun2	0.299343	1.71788	0.839174	0.356711	0.340838	1.34779e-164	1.17992e-159
FBgn0023213	eIF4G1	0.299122	1.98285	0.869837	0.343883	0.267718	6.24629e-127	5.46831e-122
FBgn0037087	CG7519	0.298401	3.08713	0.961202	0.310446	0.251969	4.91373e-119	4.30173e-114
FBgn0283536	Vha13	0.298356	5.91772	0.993742	0.300235	0.264587	2.35246e-125	2.05946e-120
FBgn0020369	Rpt6	0.298345	7.42761	0.996245	0.29947	0.290757	1.28786e-138	1.12746e-133
FBgn0037566	mRpL1	0.297986	2.63331	0.933041	0.319371	0.219869	3.61948e-103	3.16868e-98
FBgn0003360	sesB	0.297963	24.811	1	0.297963	0.387253	2.02488e-189	1.77268e-184
FBgn0033264	Nup50	0.297926	2.12844	0.90801	0.328108	0.26096	1.55968e-123	1.36543e-118
FBgn0035918	Cdc6	0.297904	1.6191	0.840426	0.354469	0.225408	6.94469e-106	6.07973e-101
FBgn0023129	aay	0.297613	1.40482	0.771589	0.385714	0.246205	3.65564e-116	3.20033e-111
FBgn0037749	CG9471	0.297427	2.29037	0.921151	0.322887	0.252353	3.1616e-119	2.76782e-114
FBgn0085188	CG34159	0.297232	3.63894	0.956195	0.310849	0.249134	1.27369e-117	1.11505e-112
FBgn0027329	CCT6	0.296973	3.93938	0.984981	0.301501	0.254134	4.0772e-120	3.56939e-115
FBgn0014009	Rab2	0.296808	6.92428	0.996871	0.29774	0.289299	7.14838e-138	6.25805e-133
FBgn0038145	Droj2	0.295771	11.5356	1	0.295771	0.312229	1.17391e-149	1.0277e-144
FBgn0003612	Su(var)2-10	0.295663	2.60164	0.928661	0.318375	0.261014	1.4644e-123	1.28201e-118
FBgn0037643	ScsbetaA	0.295257	1.34042	0.74781	0.394829	0.201055	5.26166e-94	4.60632e-89
FBgn0050499	Rpe	0.295154	4.39177	0.992491	0.297387	0.242531	2.44256e-114	2.13834e-109
FBgn0260855	Sec22	0.295117	1.47367	0.821652	0.359176	0.263734	6.31334e-125	5.52701e-120
FBgn0039959	CG17514	0.295112	1.9097	0.860451	0.342974	0.25214	4.03812e-119	3.53517e-114
FBgn0036848	Naxd	0.294542	1.06782	0.716521	0.411073	0.223975	3.50998e-105	3.07281e-100
FBgn0053181	CG33181	0.294433	2.84519	0.916771	0.321163	0.23222	3.0795e-109	2.69595e-104
FBgn0001218	Hsc70-3	0.294127	8.14037	0.998748	0.294495	0.272001	4.32004e-129	3.78198e-124
FBgn0033663	ERp60	0.294012	4.94151	0.989987	0.296986	0.260935	1.60437e-123	1.40455e-118
FBgn0037236	Skp2	0.293919	1.34267	0.78035	0.37665	0.247895	5.27241e-117	4.61573e-112
FBgn0020545	kraken	0.293777	1.96377	0.881101	0.33342	0.217464	5.43876e-102	4.76136e-97
FBgn0033005	CG3107	0.293577	1.60687	0.804756	0.364802	0.277347	8.54276e-132	7.47876e-127
FBgn0000173	ben	0.293386	8.1081	0.999374	0.29357	0.289345	6.76843e-138	5.92542e-133
FBgn0033889	CG6701	0.29334	3.92781	0.961827	0.304982	0.225308	7.77759e-106	6.80889e-101
FBgn0038462	CG17556	0.293023	4.6056	0.986859	0.296925	0.251899	5.3279e-119	4.66431e-114
FBgn0261266	zuc	0.293019	2.13458	0.902378	0.324719	0.227018	1.12288e-106	9.83029e-102
FBgn0259745	wech	0.292627	4.64547	0.985607	0.2969	0.295118	7.57324e-141	6.62999e-136
FBgn0034335	GstE1	0.292464	1.19463	0.757196	0.386246	0.206147	1.78296e-96	1.56089e-91
FBgn0028689	Rpn6	0.292458	6.23099	0.997497	0.293192	0.276768	1.67861e-131	1.46954e-126
FBgn0035726	CG9953	0.292129	3.3615	0.969337	0.30137	0.245881	5.2936e-116	4.63428e-111
FBgn0034432	CG7461	0.291962	1.42652	0.79975	0.365067	0.228269	2.72251e-107	2.38342e-102
FBgn0001226	Hsp27	0.291859	17.5073	1	0.291859	0.306241	1.45606e-146	1.27471e-141
FBgn0035032	ATPsynF	0.291828	16.3563	1	0.291828	0.251601	7.49709e-119	6.56333e-114
FBgn0032105	borr	0.29133	4.8348	0.979975	0.297283	0.245424	8.93165e-116	7.81922e-111
FBgn0036334	CG11267	0.291144	13.5174	0.998123	0.291691	0.245477	8.40433e-116	7.35757e-111
FBgn0010741	Pfdn2	0.291081	4.24583	0.98811	0.294583	0.232754	1.67953e-109	1.47035e-104
FBgn0036111	Aps	0.291029	4.81614	0.990613	0.293787	0.256684	2.1649e-121	1.89526e-116
FBgn0003423	slgA	0.29088	1.02291	0.678974	0.428411	0.23812	3.74726e-112	3.28054e-107
FBgn0000253	Cam	0.290833	20.1018	1	0.290833	0.312851	5.59493e-150	4.89808e-145
FBgn0033015	d4	0.290666	2.95853	0.946809	0.306995	0.266383	2.93924e-126	2.57316e-121
FBgn0039969	Fis1	0.290607	4.68272	0.986859	0.294476	0.226396	2.26999e-106	1.98727e-101
FBgn0041094	scyl	0.290424	4.15537	0.947434	0.306537	0.25266	2.22237e-119	1.94557e-114
FBgn0029512	Aos1	0.290247	3.6848	0.97622	0.297317	0.282215	2.89608e-134	2.53537e-129
FBgn0038491	CG5292	0.29003	1.44072	0.693992	0.417915	0.176263	4.42974e-82	3.87802e-77
FBgn0025608	Faf2	0.289864	2.96258	0.953066	0.304139	0.239558	7.27589e-113	6.36967e-108
FBgn0028687	Rpt1	0.289702	5.23469	0.994994	0.291159	0.261415	9.21882e-124	8.07061e-119
FBgn0004053	zen	0.289407	1.25686	0.503129	0.575214	0.21014	2.03686e-98	1.78317e-93
FBgn0265192	Snp	0.289203	3.5477	0.970588	0.297967	0.23042	2.37566e-108	2.07977e-103
FBgn0035980	mRRF1	0.289077	1.3703	0.779099	0.37104	0.210585	1.2363e-98	1.08232e-93
FBgn0263977	Tim17b	0.289049	7.51449	0.998123	0.289593	0.272998	1.35479e-129	1.18605e-124
FBgn0032453	CG6180	0.2887	2.38172	0.929287	0.310669	0.221014	9.94277e-104	8.7044e-99
FBgn0036580	PDCD-5	0.288694	5.14021	0.990613	0.29143	0.220068	2.8901e-103	2.53013e-98
FBgn0038857	Bdbt	0.288539	1.72613	0.868586	0.332194	0.227817	4.54356e-107	3.97766e-102
FBgn0263490	mld	0.288499	1.26	0.75219	0.383545	0.219868	3.62278e-103	3.17156e-98
FBgn0003041	pbl	0.288234	2.83597	0.891114	0.323454	0.2576	7.53418e-122	6.5958e-117
FBgn0030801	Rcp	0.288151	1.28122	0.754068	0.382129	0.225016	1.08271e-105	9.47861e-101
FBgn0001168	h	0.28808	6.35926	0.818523	0.351951	0.26189	5.3251e-124	4.66186e-119
FBgn0035906	GstO2	0.288079	2.29928	0.92428	0.311679	0.208027	2.17428e-97	1.90347e-92
FBgn0038474	mRpS11	0.288074	1.82484	0.866708	0.332377	0.198658	7.61005e-93	6.66222e-88
FBgn0015509	Cul1	0.287772	2.80163	0.946809	0.303939	0.241979	4.58854e-114	4.01704e-109
FBgn0035121	Tudor-SN	0.287589	1.94749	0.896746	0.320703	0.223547	5.69246e-105	4.98347e-100
FBgn0027084	LysRS	0.287536	2.11803	0.909887	0.316013	0.215008	8.61792e-101	7.54456e-96
FBgn0024814	Clc	0.287403	5.6658	0.996871	0.288305	0.253563	7.8644e-120	6.88489e-115
FBgn0027053	CSN5	0.287381	3.13882	0.95995	0.299371	0.249125	1.28602e-117	1.12584e-112
FBgn0267347	squ	0.287329	1.14841	0.727159	0.39514	0.2218	4.09664e-104	3.5864e-99
FBgn0038256	CG7530	0.286852	0.639301	0.520651	0.550949	0.225822	4.35071e-106	3.80883e-101
FBgn0011361	ND-ACP	0.286542	5.72206	0.98373	0.291282	0.185636	1.4362e-86	1.25732e-81
FBgn0016120	ATPsynD	0.286514	13.279	1	0.286514	0.244807	1.81021e-115	1.58475e-110
FBgn0010516	wal	0.286509	2.98824	0.946809	0.302606	0.20194	1.96014e-94	1.716e-89
FBgn0035388	CG2162	0.286474	1.18859	0.731539	0.391604	0.204097	1.76387e-95	1.54418e-90
FBgn0037739	CG12948	0.286236	3.61675	0.966834	0.296055	0.245822	5.66129e-116	4.95617e-111
FBgn0038746	Surf6	0.286212	3.65821	0.974343	0.293749	0.208413	1.4113e-97	1.23553e-92
FBgn0037354	CG12171	0.286149	0.909845	0.605757	0.472383	0.215737	3.79807e-101	3.32502e-96
FBgn0259937	Nop60B	0.286137	11.8399	1	0.286137	0.219395	6.17609e-103	5.40686e-98
FBgn0000711	flw	0.286018	4.34106	0.98373	0.290749	0.243881	5.21975e-115	4.56963e-110
FBgn0032189	Ripalpha	0.285562	2.34172	0.913016	0.312767	0.237205	1.06251e-111	9.30175e-107
FBgn0028685	Rpt4	0.285487	4.80722	0.991239	0.288011	0.257676	6.90159e-122	6.042e-117
FBgn0052512	CG32512	0.285407	1.00453	0.69587	0.410145	0.231922	4.32042e-109	3.78231e-104
FBgn0028692	Rpn2	0.285275	2.7578	0.929912	0.306777	0.233173	1.04336e-109	9.13407e-105
FBgn0264607	CaMKII	0.285246	1.68738	0.846683	0.336898	0.246823	1.80122e-116	1.57688e-111
FBgn0038307	mRpS10	0.285161	4.07846	0.976846	0.29192	0.209344	4.96954e-98	4.35059e-93
FBgn0283450	Glo1	0.284738	3.9789	0.982478	0.289816	0.232957	1.33356e-109	1.16747e-104
FBgn0028546	ics	0.284563	2.27341	0.921151	0.308921	0.203075	5.52392e-95	4.83592e-90
FBgn0028342	ATPsyndelta	0.284523	9.97186	0.999374	0.284701	0.237262	9.96079e-112	8.72017e-107
FBgn0262116	RNASEK	0.28451	20.8857	1	0.28451	0.287897	3.71136e-137	3.24911e-132
FBgn0037149	CG14561	0.284346	2.57145	0.913016	0.311435	0.199448	3.15629e-93	2.76318e-88
FBgn0030468	CG1622	0.284253	2.88014	0.946183	0.30042	0.274132	3.61981e-130	3.16896e-125
FBgn0261854	aPKC	0.284211	1.35254	0.772215	0.368047	0.20114	4.78479e-94	4.18884e-89
FBgn0035471	Sc2	0.284028	2.25333	0.914894	0.31045	0.218641	1.44338e-102	1.26361e-97
FBgn0030054	Caf1-180	0.283825	3.52618	0.96433	0.294323	0.239202	1.09154e-112	9.55592e-108
FBgn0028663	VhaM9.7-b	0.283798	4.23712	0.958698	0.296024	0.195117	3.91679e-91	3.42896e-86
FBgn0263106	DnaJ-1	0.283771	5.20659	0.971214	0.292181	0.226319	2.47752e-106	2.16894e-101
FBgn0025615	Torsin	0.283611	2.14439	0.906133	0.31299	0.218954	1.01442e-102	8.88077e-98
FBgn0017577	Mcm5	0.28349	1.85062	0.86796	0.326617	0.228147	3.12648e-107	2.73707e-102
FBgn0001233	Hsp83	0.283488	41.5076	1	0.283488	0.316002	1.30113e-151	1.13907e-146
FBgn0053138	AGBE	0.283457	0.966368	0.663955	0.426922	0.219617	4.8049e-103	4.20645e-98
FBgn0032248	Bug22	0.282893	3.40051	0.964956	0.293166	0.242259	3.33234e-114	2.9173e-109
FBgn0031360	CG31937	0.282771	1.50709	0.817272	0.345993	0.204998	6.43995e-96	5.63786e-91
FBgn0031285	CG3662	0.28276	3.15792	0.947434	0.298448	0.210766	1.00936e-98	8.83649e-94
FBgn0013749	Arf102F	0.28239	4.51318	0.975594	0.289454	0.225944	3.7899e-106	3.31787e-101
FBgn0034362	CG5323	0.281474	2.77857	0.938673	0.299864	0.190636	5.6636e-89	4.9582e-84
FBgn0004903	Rb97D	0.281445	2.92089	0.956195	0.294338	0.260001	4.72238e-123	4.13421e-118
FBgn0038013	CG10038	0.281427	1.37921	0.795995	0.353554	0.182745	3.50483e-85	3.0683e-80
FBgn0032725	Nedd8	0.281361	5.60367	0.991239	0.283848	0.236798	1.68956e-111	1.47912e-106
FBgn0031059	CG14229	0.28101	1.99148	0.893617	0.314463	0.208348	1.51691e-97	1.32798e-92
FBgn0250830	CG12547	0.280763	1.54988	0.826658	0.339636	0.274574	2.16449e-130	1.8949e-125
FBgn0035209	msd1	0.280726	2.66888	0.904255	0.31045	0.1729	1.78186e-80	1.55993e-75
FBgn0051472	sgll	0.280699	1.12045	0.719024	0.390389	0.197858	1.85578e-92	1.62465e-87
FBgn0031048	CG12237	0.280551	1.36376	0.797872	0.351624	0.200883	6.37899e-94	5.58449e-89
FBgn0031047	Rcd-1	0.280517	2.79537	0.946183	0.296472	0.20886	8.55018e-98	7.48526e-93
FBgn0003141	pr	0.28036	2.97099	0.953692	0.293974	0.217323	6.36781e-102	5.5747e-97
FBgn0260008	UQCR-11	0.280344	20.7304	1	0.280344	0.25042	2.91175e-118	2.54909e-113
FBgn0021768	nudC	0.28028	2.91439	0.946809	0.296026	0.210283	1.73478e-98	1.51871e-93
FBgn0024841	Pcd	0.280065	1.82558	0.866083	0.32337	0.18672	4.33442e-87	3.79457e-82
FBgn0263005	CG43313	0.279929	2.15773	0.900501	0.310859	0.198843	6.1922e-93	5.42096e-88
FBgn0010215	alpha-Cat	0.279868	4.3148	0.969962	0.288535	0.232105	3.51008e-109	3.0729e-104
FBgn0037930	CG14715	0.279713	5.16151	0.994368	0.281297	0.233215	9.94519e-110	8.70652e-105
FBgn0062440	EMRE	0.279433	3.1843	0.968711	0.288458	0.213769	3.46686e-100	3.03506e-95
FBgn0036565	CG5235	0.279399	1.9351	0.865457	0.322834	0.284428	2.1686e-135	1.8985e-130
FBgn0000083	AnxB9	0.279171	1.4818	0.796621	0.350444	0.227821	4.5245e-107	3.96097e-102
FBgn0016119	ATPsynCF6	0.279118	12.1175	1	0.279118	0.215687	4.01716e-101	3.51682e-96
FBgn0032886	CG9328	0.279059	2.35405	0.913642	0.305435	0.232849	1.50806e-109	1.32023e-104
FBgn0038191	CG9925	0.278847	1.15552	0.737171	0.378266	0.212501	1.44049e-99	1.26108e-94
FBgn0032198	eEF1delta	0.278593	11.6931	0.999374	0.278767	0.204753	8.47401e-96	7.41857e-91
FBgn0029915	CG14434	0.278181	1.70176	0.835419	0.332984	0.195586	2.32338e-91	2.034e-86
FBgn0259212	cno	0.277364	1.01337	0.677722	0.409259	0.208791	9.23497e-98	8.08475e-93
FBgn0250868	CG42239	0.277349	2.90345	0.949312	0.292158	0.18638	6.31206e-87	5.52589e-82
FBgn0036272	Sms	0.277121	1.60053	0.828536	0.334471	0.237472	7.84246e-112	6.86569e-107
FBgn0035600	Cyt-c1	0.277028	5.0428	0.990613	0.279653	0.18039	4.7034e-84	4.11759e-79
FBgn0034753	CG2852	0.277007	36.355	1	0.277007	0.266835	1.73997e-126	1.52326e-121
FBgn0033021	CG10417	0.276911	2.72668	0.932416	0.296983	0.232461	2.34352e-109	2.05164e-104
FBgn0036117	CG6321	0.276704	1.02055	0.693992	0.398714	0.203212	4.7386e-95	4.14841e-90
FBgn0036309	Hip1	0.276682	0.973895	0.675845	0.409386	0.231116	1.07839e-108	9.4408e-104
FBgn0033208	mRpL52	0.276504	2.5731	0.930538	0.297144	0.193053	3.87721e-90	3.3943e-85
FBgn0016126	CaMKI	0.276492	1.60973	0.831039	0.332707	0.214291	1.9283e-100	1.68813e-95
FBgn0086378	Alg-2	0.276271	3.87799	0.974343	0.283546	0.215407	5.50275e-101	4.81739e-96
FBgn0011787	mRpL12	0.276222	5.49699	0.994994	0.277611	0.228321	2.56617e-107	2.24655e-102
FBgn0020660	eIF4B	0.27615	3.71738	0.968711	0.285069	0.223282	7.68658e-105	6.72922e-100
FBgn0250791	alphaSnap	0.275893	1.9835	0.894869	0.308305	0.198928	5.63651e-93	4.93448e-88
FBgn0262511	Vha44	0.275834	2.37159	0.926158	0.297826	0.1975	2.76488e-92	2.42052e-87
FBgn0037632	CCT7	0.275616	3.86992	0.976846	0.282149	0.197652	2.33271e-92	2.04217e-87
FBgn0000826	png	0.27552	1.072	0.722778	0.381195	0.176941	2.10114e-82	1.83944e-77
FBgn0020235	ATPsyngamma	0.275392	8.46469	0.999374	0.275565	0.207861	2.61814e-97	2.29205e-92
FBgn0050410	Rpi	0.275382	2.44938	0.925532	0.297539	0.202509	1.03931e-94	9.09864e-90
FBgn0039930	CG11077	0.275319	1.36644	0.79224	0.347519	0.171482	8.45108e-80	7.3985e-75
FBgn0034046	tun	0.275062	0.836626	0.632666	0.434767	0.20361	3.04031e-95	2.66164e-90
FBgn0050359	Mal-A5	0.275017	1.19389	0.749687	0.366842	0.193572	2.17896e-90	1.90757e-85
FBgn0030241	feo	0.274516	5.25383	0.985607	0.278525	0.221345	6.8431e-104	5.99079e-99
FBgn0031660	mRpL28	0.274516	2.04532	0.89612	0.306339	0.188349	7.14367e-88	6.25393e-83
FBgn0284248	Cyt-c-p	0.274399	7.8223	0.997497	0.275087	0.293101	8.15461e-140	7.13895e-135
FBgn0026575	hang	0.274368	2.13312	0.874218	0.313844	0.191277	2.78367e-89	2.43696e-84
FBgn0010620	CG10939	0.274316	1.32167	0.778473	0.352377	0.185838	1.14881e-86	1.00573e-81
FBgn0069923	CG41128	0.274262	9.02594	0.999374	0.274433	0.183362	1.77296e-85	1.55214e-80
FBgn0058002	ND-AGGG	0.274155	2.92985	0.956195	0.286715	0.187552	1.72597e-87	1.511e-82
FBgn0039697	CG7834	0.2741	4.69111	0.991865	0.276348	0.188035	1.01098e-87	8.85063e-83
FBgn0250837	dUTPase	0.274043	13.1905	1	0.274043	0.219675	4.50312e-103	3.94225e-98
FBgn0029833	MCTS1	0.273699	3.76603	0.976846	0.280186	0.241048	1.32837e-113	1.16292e-108
FBgn0025726	unc-13	0.27365	1.49176	0.785357	0.34844	0.224983	1.12278e-105	9.82934e-101
FBgn0262115	CG17683	0.273333	1.84043	0.860451	0.317663	0.25231	3.32292e-119	2.90905e-114
FBgn0025456	CREG	0.273194	1.12481	0.739675	0.369343	0.201029	5.41785e-94	4.74306e-89
FBgn0035827	Srp9	0.273096	2.98197	0.953066	0.286545	0.188657	5.07907e-88	4.44647e-83
FBgn0038224	ATPsynE	0.273066	14.8629	1	0.273066	0.19391	1.4972e-90	1.31073e-85
FBgn0033081	geminin	0.272935	4.98383	0.989362	0.27587	0.231211	9.69178e-109	8.48467e-104
FBgn0086355	Tpi	0.272866	1.38375	0.724656	0.376545	0.223809	4.23519e-105	3.70769e-100
FBgn0013303	Nca	0.272833	1.34917	0.782854	0.348511	0.247935	5.03427e-117	4.40726e-112
FBgn0036641	Smn	0.272799	3.89772	0.977472	0.279087	0.211719	3.46493e-99	3.03338e-94
FBgn0031971	Sirup	0.272491	4.11808	0.97622	0.279128	0.234331	2.79904e-110	2.45042e-105
FBgn0037199	CG11137	0.272474	4.63143	0.992491	0.274536	0.221971	3.37611e-104	2.95561e-99
FBgn0086356	tum	0.27246	2.43126	0.923655	0.29498	0.26079	1.8968e-123	1.66056e-118
FBgn0033608	CG13220	0.272441	3.04564	0.962453	0.283069	0.198071	1.46311e-92	1.28088e-87
FBgn0024432	Dlc90F	0.272283	5.89982	0.997497	0.272966	0.219772	4.03734e-103	3.53449e-98
FBgn0035936	Tsp66E	0.272105	0.653981	0.484981	0.561063	0.216919	1.00358e-101	8.78582e-97
FBgn0014417	CG13397	0.271989	0.870875	0.624531	0.435509	0.203012	5.92428e-95	5.18641e-90
FBgn0037376	Hat1	0.271959	2.41499	0.91239	0.298073	0.188265	7.83462e-88	6.85882e-83
FBgn0027070	Ugt36E1	0.271951	0.619131	0.523154	0.519829	0.193044	3.91724e-90	3.42935e-85
FBgn0035878	CG7182	0.271609	2.7151	0.94368	0.287819	0.19442	8.49742e-91	7.43907e-86
FBgn0051715	CG31715	0.271586	3.2376	0.965582	0.281266	0.227451	6.88293e-107	6.02566e-102
FBgn0014391	sun	0.271232	8.80976	0.999374	0.271402	0.188233	8.11618e-88	7.10531e-83
FBgn0030038	CG1440	0.271102	3.80857	0.970588	0.279317	0.244968	1.50606e-115	1.31848e-110
FBgn0035169	Dci	0.270779	1.53363	0.832916	0.325097	0.186202	7.6852e-87	6.728e-82
FBgn0029676	HIP-R	0.270674	1.92179	0.87985	0.307636	0.181489	1.40005e-84	1.22568e-79
FBgn0041186	Slbp	0.270316	2.53666	0.920526	0.293654	0.199264	3.87768e-93	3.39472e-88
FBgn0035829	HP4	0.270302	9.7475	1	0.270302	0.209455	4.39057e-98	3.84373e-93
FBgn0250838	roh	0.270233	14.3771	1	0.270233	0.183971	9.05077e-86	7.92349e-81
FBgn0030718	ND-20	0.270227	4.13204	0.981852	0.275222	0.214047	2.53655e-100	2.22062e-95
FBgn0031452	Cwc25	0.270122	2.20177	0.904881	0.298517	0.187517	1.79439e-87	1.5709e-82
FBgn0043002	Chrac-14	0.270113	6.16057	0.994368	0.271643	0.217026	8.89611e-102	7.7881e-97
FBgn0039163	CG5515	0.269559	3.42225	0.96433	0.27953	0.187731	1.41525e-87	1.23898e-82
FBgn0039698	CG7789	0.269362	1.19017	0.748436	0.359901	0.168023	3.74111e-78	3.27516e-73
FBgn0026401	Nipped-B	0.269336	5.49412	0.986859	0.272923	0.203067	5.57199e-95	4.878e-90
FBgn0026566	CG1307	0.269093	6.02803	0.996245	0.270107	0.197962	1.6516e-92	1.44589e-87
FBgn0035082	CG2811	0.2689	1.91654	0.887985	0.30282	0.165201	8.19735e-77	7.17637e-72
FBgn0032511	ND-B22	0.268593	5.50711	0.991239	0.270967	0.180152	6.12051e-84	5.3582e-79
FBgn0034215	Mtap	0.268517	1.57725	0.826658	0.324823	0.174683	2.51601e-81	2.20264e-76
FBgn0036505	CG7945	0.268463	4.21835	0.974969	0.275355	0.195989	1.48393e-91	1.2991e-86
FBgn0001280	janA	0.268408	7.95541	0.997497	0.269082	0.172684	2.25859e-80	1.97728e-75
FBgn0039870	CG1896	0.268361	1.4971	0.828536	0.323898	0.21855	1.60045e-102	1.40111e-97
FBgn0039735	Nph	0.268131	16.8094	1	0.268131	0.216515	1.58159e-101	1.38461e-96
FBgn0030030	CG1636	0.268098	1.30737	0.731539	0.366485	0.225138	9.42764e-106	8.25343e-101
FBgn0030067	Rbm13	0.268031	2.57232	0.929287	0.288426	0.162389	1.76839e-75	1.54814e-70
FBgn0015625	CycB3	0.267957	2.70097	0.943054	0.284138	0.256568	2.47373e-121	2.16563e-116
FBgn0032949	Lamp1	0.267949	4.8821	0.989362	0.27083	0.220358	2.08448e-103	1.82486e-98
FBgn0010213	Sod2	0.267845	3.36872	0.967459	0.276854	0.182623	4.00765e-85	3.5085e-80
FBgn0052626	AMPdeam	0.26774	2.14659	0.89174	0.300245	0.199588	2.70239e-93	2.36581e-88
FBgn0004363	porin	0.267738	19.1516	1	0.267738	0.20256	9.81271e-95	8.59054e-90
FBgn0032444	CCT4	0.267723	5.47495	0.993116	0.269578	0.201462	3.3431e-94	2.92672e-89
FBgn0030151	CG1354	0.267689	2.99132	0.955569	0.280135	0.190621	5.76213e-89	5.04446e-84
FBgn0030719	eIF5	0.267501	1.66968	0.833542	0.320921	0.186675	4.55293e-87	3.98586e-82
FBgn0041191	Rheb	0.267407	2.50994	0.934919	0.286022	0.193156	3.45758e-90	3.02694e-85
FBgn0036928	Tom20	0.267228	10.1119	1	0.267228	0.176558	3.19985e-82	2.80131e-77
FBgn0033000	CG14464	0.266949	4.11583	0.964956	0.276644	0.217866	3.45483e-102	3.02453e-97
FBgn0011725	twin	0.266909	2.00255	0.894243	0.298475	0.207746	2.9791e-97	2.60805e-92
FBgn0261403	sxc	0.266847	3.3024	0.95995	0.27798	0.193074	3.78665e-90	3.31502e-85
FBgn0015019	CCT3	0.266428	6.81659	0.99562	0.2676	0.172219	3.76402e-80	3.29521e-75
FBgn0034921	DCP1	0.266355	1.52937	0.831039	0.320508	0.228565	1.9469e-107	1.70442e-102
FBgn0000447	Dhod	0.266352	1.58544	0.837297	0.31811	0.186051	9.08184e-87	7.9507e-82
FBgn0031848	Nse1	0.266262	1.69336	0.858573	0.310122	0.203055	5.64932e-95	4.9457e-90
FBgn0028990	Spn27A	0.265947	1.22561	0.763454	0.348347	0.188966	3.60599e-88	3.15686e-83
FBgn0013732	sced	0.265932	0.800274	0.628911	0.422844	0.233497	7.21772e-110	6.31875e-105
FBgn0028380	fal	0.265725	2.03377	0.886108	0.299879	0.20476	8.40573e-96	7.3588e-91
FBgn0260986	mei-38	0.265619	0.777669	0.614518	0.43224	0.203729	2.66147e-95	2.32999e-90
FBgn0024329	Mekk1	0.265501	0.783192	0.601377	0.441489	0.198922	5.67464e-93	4.96787e-88
FBgn0036908	TORIP	0.265242	0.857842	0.633917	0.418417	0.177427	1.23003e-82	1.07683e-77
FBgn0032732	CG15168	0.265237	3.30951	0.953692	0.278116	0.158728	9.57373e-74	8.38132e-69
FBgn0262731	CG33941	0.265166	1.29197	0.772841	0.343105	0.201377	3.67686e-94	3.21891e-89
FBgn0051453	pch2	0.264909	1.9439	0.892365	0.296861	0.192187	1.01359e-89	8.87344e-85
FBgn0021856	l(2)k14505	0.264865	1.75846	0.859825	0.308045	0.164572	1.6296e-76	1.42663e-71
FBgn0019830	colt	0.264827	1.65679	0.854819	0.309805	0.171823	5.8083e-80	5.08487e-75
FBgn0036994	CG5199	0.26471	1.46191	0.801001	0.330474	0.189335	2.39659e-88	2.09809e-83
FBgn0259168	mnb	0.264434	6.4152	0.996871	0.265264	0.197027	4.68093e-92	4.09792e-87
FBgn0028683	spt4	0.26422	4.07276	0.981852	0.269103	0.213874	3.08399e-100	2.69988e-95
FBgn0030060	CG2004	0.2642	1.72927	0.847309	0.31181	0.176553	3.21763e-82	2.81687e-77
FBgn0051523	CG31523	0.264047	1.29815	0.778473	0.339186	0.211064	7.23179e-99	6.33107e-94
FBgn0037652	CG11980	0.263706	2.0058	0.883605	0.298444	0.19026	8.59844e-89	7.5275e-84
FBgn0260632	dl	0.26361	0.63253	0.45995	0.573127	0.211959	2.64655e-99	2.31692e-94
FBgn0032246	Wdfy2	0.263469	1.62631	0.832916	0.316321	0.183057	2.48326e-85	2.17397e-80
FBgn0266421	RPA3	0.263377	6.14756	0.993116	0.265203	0.175965	6.14113e-82	5.37625e-77
FBgn0037707	RnpS1	0.263358	2.9496	0.953692	0.276145	0.218806	1.19896e-102	1.04963e-97
FBgn0266124	ghi	0.263323	3.69853	0.979349	0.268876	0.181311	1.70496e-84	1.4926e-79
FBgn0011648	Mad	0.263256	2.25272	0.9199	0.286179	0.203735	2.64388e-95	2.31458e-90
FBgn0034579	mRpL54	0.263141	2.08408	0.906758	0.2902	0.165456	6.20393e-77	5.43123e-72
FBgn0266570	NO66	0.263123	1.21864	0.736546	0.357239	0.189128	3.01375e-88	2.63839e-83
FBgn0014037	Su(Tpl)	0.263112	3.09604	0.956821	0.274986	0.179344	1.49022e-83	1.30461e-78
FBgn0039115	CG10214	0.263019	2.48843	0.942428	0.279087	0.184546	4.79178e-86	4.19497e-81
FBgn0032833	COX4	0.262998	10.802	1	0.262998	0.173779	6.79171e-81	5.94581e-76
FBgn0023522	CG11596	0.262824	1.89288	0.877972	0.299353	0.168384	2.51862e-78	2.20492e-73
FBgn0037312	CG11999	0.26279	2.44736	0.92428	0.284319	0.182145	6.79112e-85	5.94529e-80
FBgn0037468	CG1943	0.262781	5.10557	0.963079	0.272855	0.155754	2.43447e-72	2.13126e-67
FBgn0014028	SdhB	0.262758	3.17145	0.969962	0.270895	0.176462	3.5566e-82	3.11363e-77
FBgn0010786	l(3)02640	0.262622	1.13575	0.719024	0.365248	0.191347	2.57397e-89	2.25338e-84
FBgn0036515	AIMP2	0.262578	1.92602	0.881101	0.298011	0.157017	6.16688e-73	5.3988e-68
FBgn0038673	CG14286	0.262526	1.5149	0.821652	0.31951	0.157444	3.87202e-73	3.38976e-68
FBgn0033844	bbc	0.262462	2.02543	0.901752	0.291057	0.220084	2.83965e-103	2.48597e-98
FBgn0032216	Usp14	0.262232	3.12884	0.944305	0.277698	0.180575	3.83753e-84	3.35957e-79
FBgn0024227	aurB	0.262112	3.23159	0.96433	0.271807	0.199566	2.76797e-93	2.42322e-88
FBgn0044871	Gos28	0.261573	1.27395	0.756571	0.345735	0.18596	1.0044e-86	8.79303e-82
FBgn0259243	Pka-R1	0.261501	1.30537	0.775344	0.33727	0.162528	1.5196e-75	1.33034e-70
FBgn0027090	GlnRS	0.261422	1.13234	0.732791	0.356748	0.151417	2.7053e-70	2.36836e-65
FBgn0015924	crq	0.26136	1.64698	0.843554	0.309832	0.178593	3.40884e-83	2.98427e-78
FBgn0033233	Kdm4A	0.261345	0.932291	0.680851	0.38385	0.184202	7.01102e-86	6.1378e-81
FBgn0040011	Slmap	0.261253	1.30384	0.778473	0.335596	0.199952	1.80058e-93	1.57631e-88
FBgn0000251	cad	0.261239	0.864025	0.545682	0.478739	0.185516	1.64033e-86	1.43602e-81
FBgn0034894	sigmar	0.261121	1.29889	0.760325	0.343434	0.184345	5.98246e-86	5.23735e-81
FBgn0035083	Tina-1	0.261014	2.0435	0.904255	0.288651	0.188478	6.18891e-88	5.41808e-83
FBgn0286784	TER94	0.260854	4.13362	0.98811	0.263993	0.188547	5.73719e-88	5.02262e-83
FBgn0038453	Arl6IP1	0.260769	3.66624	0.978723	0.266438	0.205162	5.36242e-96	4.69453e-91
FBgn0039073	CG4408	0.260667	0.840267	0.636421	0.409584	0.180168	6.01056e-84	5.26194e-79
FBgn0085810	CR41597	0.260482	0.88811	0.627034	0.41542	0.224476	1.99278e-105	1.74458e-100
FBgn0085443	spri	0.260419	0.761789	0.571339	0.455804	0.215825	3.43801e-101	3.00981e-96
FBgn0036726	QIL1	0.260361	5.77589	0.993116	0.262165	0.157686	2.97448e-73	2.60401e-68
FBgn0036341	Syx13	0.260353	0.950556	0.655194	0.397368	0.185137	2.49349e-86	2.18292e-81
FBgn0020255	Ran	0.260172	17.0363	1	0.260172	0.237014	1.32148e-111	1.15689e-106
FBgn0030938	CG15047	0.260164	0.832982	0.578849	0.44945	0.178652	3.19437e-83	2.79651e-78
FBgn0031822	Phf5a	0.260102	7.10995	0.994994	0.261411	0.165925	3.71572e-77	3.25292e-72
FBgn0024364	CG11417	0.260049	2.22885	0.90363	0.287783	0.151274	3.16014e-70	2.76654e-65
FBgn0001139	gro	0.259869	9.09812	0.998748	0.260194	0.233613	6.32825e-110	5.54007e-105
FBgn0004107	Cdk2	0.259686	2.00626	0.887985	0.292444	0.226458	2.11774e-106	1.85397e-101
FBgn0029887	CG3198	0.25966	2.66157	0.939299	0.27644	0.185324	2.0275e-86	1.77498e-81
FBgn0265177	CG44242	0.259658	4.17329	0.981227	0.264626	0.156403	1.20187e-72	1.05218e-67
FBgn0040602	CG14545	0.259358	3.75449	0.928035	0.27947	0.173728	7.17625e-81	6.28245e-76
FBgn0285971	prg	0.259295	1.44033	0.811014	0.319717	0.23143	7.55773e-109	6.61641e-104
FBgn0003410	sina	0.259218	6.55795	0.99562	0.260359	0.197334	3.32358e-92	2.90963e-87
FBgn0030501	BthD	0.259164	3.33668	0.968085	0.267708	0.179226	1.69685e-83	1.48551e-78
FBgn0033773	Mos	0.258983	0.631031	0.520651	0.497421	0.169298	9.25552e-79	8.10274e-74
FBgn0016691	ATPsynO	0.258915	9.76166	0.997497	0.259564	0.14943	2.33358e-69	2.04294e-64
FBgn0028686	Rpt3	0.258768	4.87035	0.988736	0.261716	0.165257	7.70494e-77	6.74529e-72
FBgn0010282	TfIIFalpha	0.258692	3.18262	0.95995	0.269485	0.144008	8.23891e-67	7.21276e-62
FBgn0260798	Gprk1	0.258452	2.21168	0.906758	0.285029	0.204753	8.47661e-96	7.42085e-91
FBgn0045823	vsg	0.258429	2.40825	0.924906	0.279411	0.166866	1.32691e-77	1.16164e-72
FBgn0262518	Rab8	0.258415	1.82607	0.857947	0.301201	0.205383	4.19113e-96	3.66912e-91
FBgn0023526	CG2865	0.258403	6.59362	0.984355	0.262509	0.178713	2.98582e-83	2.61394e-78
FBgn0058160	CG40160	0.258395	0.810239	0.618899	0.417508	0.215463	5.16349e-101	4.52038e-96
FBgn0001224	Hsp23	0.258176	27.9508	0.88423	0.291978	0.0250821	1.33065e-12	1.16491e-07
FBgn0033100	CG3420	0.258073	2.03136	0.893617	0.288796	0.163263	6.81137e-76	5.96301e-71
FBgn0024542	Neos	0.257877	1.98168	0.888611	0.290202	0.16421	2.42105e-76	2.11951e-71
FBgn0000250	cact	0.257873	1.66047	0.829161	0.311005	0.157957	2.21618e-73	1.94015e-68
FBgn0030480	Tim9a	0.25781	6.60175	0.996245	0.258782	0.151824	1.73899e-70	1.5224e-65
FBgn0265174	PIG-V	0.257666	0.910241	0.648936	0.397059	0.173027	1.55021e-80	1.35713e-75
FBgn0027054	CSN4	0.257648	1.80089	0.86796	0.296844	0.189264	2.59229e-88	2.26942e-83
FBgn0015245	Hsp60A	0.257479	3.75314	0.974969	0.26409	0.179003	2.17016e-83	1.89987e-78
FBgn0040078	pont	0.257476	2.34303	0.914894	0.281427	0.162642	1.34158e-75	1.17448e-70
FBgn0261396	Rpn3	0.257435	2.64884	0.929912	0.276838	0.181826	9.65622e-85	8.45354e-80
FBgn0038739	CG4686	0.256894	1.85814	0.881101	0.29156	0.168349	2.61781e-78	2.29176e-73
FBgn0027521	CG3679	0.256889	0.738429	0.55194	0.465428	0.181487	1.40327e-84	1.22849e-79
FBgn0029152	Mkrn1	0.256816	1.91953	0.81164	0.316416	0.154432	1.0247e-71	8.97077e-67
FBgn0003076	Pgm1	0.256674	1.26383	0.775344	0.331045	0.271598	6.90734e-129	6.04703e-124
FBgn0031776	Pfdn1	0.256626	2.38988	0.929912	0.275968	0.141923	7.82733e-66	6.85244e-61
FBgn0034902	CG5532	0.256605	3.12293	0.965582	0.265752	0.153584	2.57506e-71	2.25434e-66
FBgn0036815	HipHop	0.256518	2.56181	0.933041	0.274927	0.17721	1.56192e-82	1.36738e-77
FBgn0010339	128up	0.256377	1.612	0.842929	0.30415	0.171349	9.77303e-80	8.5558e-75
FBgn0085468	ND-MWFE	0.256321	7.06123	0.997497	0.256964	0.140156	5.26189e-65	4.60652e-60
FBgn0025809	Paf-AHalpha	0.256214	4.20134	0.98811	0.259297	0.17307	1.47874e-80	1.29457e-75
FBgn0036998	CG5969	0.256199	1.70883	0.829161	0.308986	0.214617	1.33789e-100	1.17125e-95
FBgn0027529	tapas	0.256148	0.886978	0.637672	0.401693	0.15986	2.7865e-74	2.43944e-69
FBgn0037531	CG10445	0.256108	0.840019	0.57572	0.444849	0.191745	1.65561e-89	1.4494e-84
FBgn0011715	Snr1	0.256077	3.73744	0.973717	0.262989	0.209405	4.6426e-98	4.06437e-93
FBgn0040752	Prosap	0.256051	3.53791	0.967459	0.264664	0.168633	1.91729e-78	1.67849e-73
FBgn0038925	Cchl	0.256032	3.65753	0.974969	0.262605	0.160625	1.21026e-74	1.05952e-69
FBgn0024509	Sec13	0.256	2.61563	0.938048	0.272907	0.179816	8.86264e-84	7.7588e-79
FBgn0011289	TfIIA-L	0.255981	2.10766	0.897997	0.285057	0.165726	4.61446e-77	4.03973e-72
FBgn0000181	bic	0.255902	20.6472	0.999374	0.256062	0.1361	4.15333e-63	3.63603e-58
FBgn0027598	cindr	0.255881	8.91538	0.999374	0.256041	0.194966	4.63185e-91	4.05495e-86
FBgn0040666	CG12848	0.25581	2.66114	0.94368	0.271077	0.155921	2.03163e-72	1.77859e-67
FBgn0001186	Hex-A	0.25562	0.881021	0.59637	0.428626	0.210603	1.21182e-98	1.06088e-93
FBgn0261933	SmD1	0.255343	5.92317	0.994368	0.25679	0.204051	1.8574e-95	1.62606e-90
FBgn0030969	Usp39	0.2553	1.58255	0.8398	0.304001	0.206396	1.34915e-96	1.18112e-91
FBgn0035978	UGP	0.255138	0.986793	0.612641	0.416456	0.209958	2.49823e-98	2.18707e-93
FBgn0062442	Cisd2	0.254965	2.5915	0.920526	0.276978	0.128874	9.73254e-60	8.52035e-55
FBgn0051992	gw	0.25487	3.19263	0.967459	0.263443	0.165279	7.52636e-77	6.58895e-72
FBgn0037384	dgrn	0.25487	1.40558	0.799124	0.318937	0.184572	4.65972e-86	4.07935e-81
FBgn0039936	Gyf	0.254847	1.72629	0.831039	0.30666	0.172786	2.02007e-80	1.76847e-75
FBgn0035421	CG12034	0.254554	1.23101	0.760951	0.334521	0.165076	9.39845e-77	8.22787e-72
FBgn0039674	CG1907	0.254403	1.23147	0.747184	0.340482	0.170359	2.89283e-79	2.53252e-74
FBgn0031459	CG2862	0.254196	5.76526	0.994994	0.255475	0.180451	4.39762e-84	3.84989e-79
FBgn0263852	Dad1	0.254025	4.82739	0.992491	0.255947	0.173315	1.12949e-80	9.88814e-76
FBgn0037185	CG11367	0.254018	1.14639	0.749687	0.338833	0.169324	9.00068e-79	7.87964e-74
FBgn0028691	Rpn9	0.253685	4.035	0.981227	0.258539	0.166414	2.17663e-77	1.90553e-72
FBgn0025800	Smox	0.253634	1.59364	0.847309	0.299341	0.172938	1.70962e-80	1.49669e-75
FBgn0005355	Su(fu)	0.253422	1.36545	0.798498	0.317373	0.161522	4.55023e-75	3.9835e-70
FBgn0003015	osk	0.253272	1.30442	0.622653	0.406762	0.139553	1.00799e-64	8.82441e-60
FBgn0033273	Gasz	0.253222	1.02215	0.68836	0.367862	0.18336	1.7768e-85	1.5555e-80
FBgn0047135	CG32276	0.253087	9.95321	1	0.253087	0.154393	1.06865e-71	9.35548e-67
FBgn0038805	TFAM	0.252791	2.46821	0.929912	0.271843	0.151604	2.2089e-70	1.93378e-65
FBgn0004828	His3.3B	0.25274	18.5445	1	0.25274	0.145902	1.06259e-67	9.30245e-63
FBgn0030263	CG2076	0.252706	1.3302	0.782228	0.323059	0.149995	1.26475e-69	1.10722e-64
FBgn0051151	wge	0.252598	2.80039	0.944305	0.267496	0.168835	1.53789e-78	1.34635e-73
FBgn0030122	Aladin	0.252565	1.04006	0.717772	0.351874	0.141709	9.85519e-66	8.62772e-61
FBgn0026737	CG6171	0.252349	1.47809	0.80413	0.313816	0.148156	9.276e-69	8.12067e-64
FBgn0015282	Rpt2	0.251956	4.0528	0.981227	0.256776	0.162849	1.07001e-75	9.3674e-71
FBgn0050404	Tango11	0.251912	1.86237	0.868586	0.290025	0.18144	1.47898e-84	1.29477e-79
FBgn0003720	tll	0.251627	1.36708	0.507509	0.495807	0.200836	6.72147e-94	5.88431e-89
FBgn0260484	HIP	0.25158	1.78547	0.864831	0.290901	0.162328	1.88997e-75	1.65458e-70
FBgn0003687	Tbp	0.251512	1.48586	0.802253	0.313508	0.177067	1.82801e-82	1.60033e-77
FBgn0029979	mahe	0.251157	2.23324	0.897997	0.279686	0.165846	4.04832e-77	3.5441e-72
FBgn0037607	CG8036	0.25115	2.64481	0.938048	0.267737	0.179741	9.61827e-84	8.42031e-79
FBgn0019644	ATPsynB	0.251067	6.4157	0.994368	0.252489	0.121494	2.60991e-56	2.28484e-51
FBgn0015222	Fer1HCH	0.250991	10.9616	1	0.250991	0.140158	5.25267e-65	4.59845e-60
FBgn0265101	Sgt1	0.250984	1.79499	0.858573	0.292327	0.151837	1.71604e-70	1.5023e-65
FBgn0032997	CG17486	0.250913	1.45219	0.802253	0.312761	0.217587	4.7315e-102	4.14219e-97
FBgn0029176	eEF1gamma	0.250785	25.1339	1	0.250785	0.130893	1.11657e-60	9.775e-56
FBgn0025820	JTBR	0.250754	1.32692	0.775344	0.32341	0.167138	9.85793e-78	8.63013e-73
FBgn0030365	Tango4	0.250752	1.9623	0.882979	0.283984	0.165003	1.01788e-76	8.91104e-72
FBgn0031398	CG10880	0.2507	2.48936	0.923029	0.271606	0.161963	2.81542e-75	2.46476e-70
FBgn0266582	ND-30	0.250518	3.39403	0.967459	0.258944	0.132418	2.174e-61	1.90323e-56
FBgn0039955	CG41099	0.250256	1.34741	0.772215	0.324076	0.169495	7.45734e-79	6.52852e-74
FBgn0013269	Fkbp39	0.250147	14.2377	1	0.250147	0.126897	8.08635e-59	7.07919e-54
FBgn0002566	lt	0.250114	1.0564	0.698999	0.357817	0.175978	6.06044e-82	5.30561e-77
FBgn0011726	tsr	0.249615	27.3901	1	0.249615	0.129024	8.28448e-60	7.25265e-55
FBgn0003187	qua	0.249389	0.609269	0.519399	0.480149	0.192676	5.89241e-90	5.15851e-85
FBgn0011826	Pp2B-14D	0.249337	1.15131	0.717772	0.347377	0.177609	1.00662e-82	8.81242e-78
FBgn0033453	Sting	0.249247	0.670977	0.553817	0.450052	0.184455	5.30045e-86	4.64028e-81
FBgn0030366	Usp7	0.249228	5.65464	0.996871	0.250011	0.158366	1.41867e-73	1.24197e-68
FBgn0031684	ND-13A	0.248979	3.76027	0.98373	0.253097	0.152928	5.24922e-71	4.59543e-66
FBgn0036035	CG18178	0.248899	1.9787	0.890488	0.279508	0.154015	1.61131e-71	1.41062e-66
FBgn0033556	CG12343	0.248658	2.24361	0.903004	0.275368	0.145463	1.70802e-67	1.49528e-62
FBgn0029868	ND-B16.6	0.24858	5.84307	0.99562	0.249674	0.13879	2.29587e-64	2.00992e-59
FBgn0264816	koko	0.248533	2.19266	0.915519	0.271467	0.136612	2.39478e-63	2.09651e-58
FBgn0036909	Ccdc58	0.248462	1.47781	0.788486	0.315113	0.137015	1.55244e-63	1.35909e-58
FBgn0033017	CG10465	0.248434	2.68263	0.932416	0.266441	0.176901	2.19507e-82	1.92168e-77
FBgn0030894	Mvb12	0.248238	1.58175	0.829787	0.299158	0.161498	4.67329e-75	4.09123e-70
FBgn0037470	Tailor	0.248237	0.87954	0.636421	0.390052	0.161632	4.03721e-75	3.53438e-70
FBgn0016034	mael	0.248124	1.37871	0.789737	0.314186	0.152159	1.20981e-70	1.05913e-65
FBgn0038400	CG5903	0.248121	2.52796	0.934919	0.265393	0.124742	8.11544e-58	7.10466e-53
FBgn0034051	Mlf	0.248113	3.41067	0.972466	0.255138	0.174788	2.24045e-81	1.9614e-76
FBgn0032703	CG10343	0.248099	2.07984	0.906758	0.273611	0.146143	8.19208e-68	7.17176e-63
FBgn0029823	Shmt	0.248015	1.66327	0.851064	0.291417	0.151417	2.70397e-70	2.36719e-65
FBgn0039558	BCAS2	0.247967	3.14667	0.956821	0.259157	0.163263	6.80751e-76	5.95963e-71
FBgn0086707	ncm	0.247959	3.11675	0.944305	0.262584	0.147904	1.21858e-68	1.0668e-63
FBgn0038972	CG7054	0.247916	0.967297	0.677096	0.366145	0.166851	1.34943e-77	1.18135e-72
FBgn0000615	exu	0.247858	0.708707	0.426783	0.580758	0.171725	6.46941e-80	5.66365e-75
FBgn0035482	CG14985	0.247816	1.21368	0.769712	0.32196	0.141899	8.03231e-66	7.03188e-61
FBgn0036237	viaf	0.2478	2.44518	0.891114	0.278079	0.137385	1.04246e-63	9.12619e-59
FBgn0036850	Gem2	0.247758	0.842113	0.623279	0.397508	0.173497	9.25774e-81	8.10469e-76
FBgn0031988	CG8668	0.247565	1.85891	0.848561	0.291747	0.192765	5.33633e-90	4.67169e-85
FBgn0036820	Grx1	0.24756	2.04898	0.896746	0.276065	0.143644	1.21977e-66	1.06785e-61
FBgn0021906	RFeSP	0.24734	8.3277	0.997497	0.247961	0.124053	1.69579e-57	1.48458e-52
FBgn0033402	Myd88	0.247272	1.07851	0.715895	0.345403	0.161238	6.20518e-75	5.43233e-70
FBgn0032640	Sgt	0.247188	2.7175	0.950563	0.260044	0.147452	1.98678e-68	1.73933e-63
FBgn0041004	CG17715	0.247173	1.55582	0.822278	0.300595	0.179587	1.14022e-83	9.98208e-79
FBgn0029113	Uba2	0.247118	3.02552	0.954318	0.258947	0.155367	3.70941e-72	3.2474e-67
FBgn0046706	Haspin	0.24711	1.45181	0.772841	0.319743	0.191955	1.31136e-89	1.14803e-84
FBgn0036967	SCCRO4	0.246758	2.01197	0.894869	0.275748	0.188834	4.17395e-88	3.65408e-83
FBgn0014861	Mcm2	0.246597	1.24979	0.769712	0.320375	0.160145	2.04441e-74	1.78978e-69
FBgn0033886	Rpn13	0.246481	2.6567	0.928661	0.265415	0.144509	4.79056e-67	4.1939e-62
FBgn0033529	CG17765	0.246469	3.03828	0.963705	0.255752	0.157878	2.41537e-73	2.11454e-68
FBgn0030943	Nup35	0.24646	2.15359	0.904881	0.272367	0.174289	3.87774e-81	3.39477e-76
FBgn0004864	hop	0.246458	0.824186	0.599499	0.411106	0.18816	8.80411e-88	7.70756e-83
FBgn0023517	Pgam5	0.246372	1.81603	0.873592	0.282022	0.156857	7.33917e-73	6.42508e-68
FBgn0031066	COX6B	0.24635	12.0757	1	0.24635	0.0947033	5.64791e-44	4.94446e-39
FBgn0032101	CG9586	0.246341	2.27518	0.918023	0.268338	0.135164	1.13682e-62	9.95228e-58
FBgn0047178	CG32147	0.246261	1.02823	0.697121	0.353254	0.190151	9.69406e-89	8.48667e-84
FBgn0005777	PpD3	0.246223	1.12477	0.661452	0.372247	0.153549	2.67458e-71	2.34146e-66
FBgn0262515	VhaAC45	0.246222	2.87673	0.958073	0.256997	0.151449	2.61275e-70	2.28733e-65
FBgn0036929	CG7668	0.246089	1.6102	0.820401	0.299962	0.158975	7.31151e-74	6.40086e-69
FBgn0021967	ND-PDSW	0.246029	6.29241	0.994994	0.247267	0.125656	3.05203e-58	2.6719e-53
FBgn0036762	CG7430	0.24596	2.05577	0.897372	0.274089	0.168704	1.77385e-78	1.55292e-73
FBgn0038277	RpS5b	0.245942	38.2756	1	0.245942	0.0927609	4.36275e-43	3.81937e-38
FBgn0010333	Rac1	0.245771	5.02749	0.989362	0.248414	0.114345	5.30721e-53	4.6462e-48
FBgn0031449	CG31689	0.245769	0.507826	0.418648	0.587053	0.199801	2.13077e-93	1.86539e-88
FBgn0034282	Mapmodulin	0.245708	13.6883	1	0.245708	0.126821	8.77397e-59	7.68117e-54
FBgn0024362	Naa30A	0.245688	1.40225	0.790363	0.310854	0.178985	2.21289e-83	1.93728e-78
FBgn0262716	Arp3	0.245459	1.98994	0.899875	0.27277	0.167254	8.68189e-78	7.60056e-73
FBgn0015544	spag	0.245394	1.29488	0.774093	0.317009	0.162784	1.14847e-75	1.00542e-70
FBgn0010342	Map60	0.245337	4.08211	0.973717	0.25196	0.258635	2.28258e-122	1.99829e-117
FBgn0034265	Snx16	0.245318	1.26734	0.701502	0.349704	0.121713	2.06515e-56	1.80794e-51
FBgn0031677	CG14036	0.245265	1.93744	0.844806	0.290321	0.133463	7.07471e-62	6.19356e-57
FBgn0044511	mRpS21	0.245181	3.29162	0.958073	0.255911	0.142926	2.64903e-66	2.3191e-61
FBgn0031418	CG3609	0.245078	1.1776	0.758448	0.323131	0.14023	4.8596e-65	4.25434e-60
FBgn0026533	Dek	0.244951	3.16646	0.965582	0.253682	0.176438	3.65332e-82	3.1983e-77
FBgn0034924	CG17658	0.244908	0.664645	0.486859	0.503038	0.155064	5.15792e-72	4.5155e-67
FBgn0037535	PIG-H	0.244787	0.717257	0.586984	0.417026	0.173366	1.06874e-80	9.35632e-76
FBgn0053100	eIF4EHP	0.244743	1.51101	0.808511	0.302708	0.132549	1.8884e-61	1.6532e-56
FBgn0033566	CG18004	0.244715	1.20172	0.755945	0.32372	0.176402	3.79842e-82	3.32532e-77
FBgn0264294	Cyt-b5	0.244682	6.80322	0.994994	0.245913	0.123187	4.27589e-57	3.74333e-52
FBgn0037001	ND-39	0.244639	2.87102	0.953066	0.256686	0.129911	3.20214e-60	2.80332e-55
FBgn0039737	CG7920	0.244426	1.36963	0.790989	0.309013	0.143238	1.89178e-66	1.65616e-61
FBgn0034802	CNBP	0.244423	30.6625	1	0.244423	0.139228	1.4314e-64	1.25312e-59
FBgn0027889	ball	0.24409	2.47208	0.933041	0.261607	0.18105	2.27209e-84	1.9891e-79
FBgn0261793	Trf2	0.244048	10.8325	1	0.244048	0.134441	2.47423e-62	2.16607e-57
FBgn0038722	Nup58	0.243923	1.27831	0.767209	0.317936	0.173878	6.08768e-81	5.32946e-76
FBgn0033183	CG1620	0.2437	1.09932	0.710263	0.343112	0.156822	7.6192e-73	6.67023e-68
FBgn0283494	Adk2	0.243477	2.89545	0.941176	0.258695	0.130756	1.29343e-60	1.13234e-55
FBgn0032746	CG10470	0.243279	3.03589	0.956821	0.254258	0.131129	8.672e-61	7.5919e-56
FBgn0051301	CG31301	0.243254	1.99818	0.891114	0.272978	0.149732	1.68125e-69	1.47185e-64
FBgn0027359	Tim8	0.243238	4.05977	0.974969	0.249482	0.13049	1.72029e-60	1.50602e-55
FBgn0037220	CG14641	0.243221	3.17529	0.959324	0.253534	0.170123	3.75031e-79	3.28321e-74
FBgn0036537	CG18081	0.243143	4.17523	0.981227	0.247795	0.11481	3.23613e-53	2.83307e-48
FBgn0083167	Neb-cGP	0.243055	10.7141	0.999374	0.243207	0.102278	1.91182e-47	1.6737e-42
FBgn0036165	chrb	0.242924	2.40295	0.795995	0.305182	0.121946	1.61087e-56	1.41024e-51
FBgn0011224	heph	0.242755	1.79155	0.857322	0.283155	0.166655	1.6712e-77	1.46305e-72
FBgn0262734	eIF4H1	0.242715	3.36292	0.95995	0.252841	0.14879	4.66481e-69	4.08381e-64
FBgn0039858	CycG	0.242645	7.074	0.996871	0.243406	0.130936	1.06624e-60	9.33441e-56
FBgn0030364	Lsm12	0.242597	4.01447	0.983104	0.246766	0.175364	1.18985e-81	1.04166e-76
FBgn0035110	thoc7	0.242587	2.50808	0.934919	0.259474	0.142449	4.43379e-66	3.88156e-61
FBgn0026409	Mpcp2	0.242562	4.14476	0.98373	0.246574	0.144176	6.86796e-67	6.01256e-62
FBgn0267398	Yeti	0.242531	6.03522	0.99562	0.243598	0.159055	6.70334e-74	5.86844e-69
FBgn0016687	Nurf-38	0.242446	2.7378	0.940551	0.25777	0.131452	6.12905e-61	5.36567e-56
FBgn0013746	alien	0.242255	2.44153	0.930538	0.260339	0.152165	1.20091e-70	1.05134e-65
FBgn0039554	CG5003	0.242211	1.19088	0.744681	0.325254	0.185116	2.55347e-86	2.23544e-81
FBgn0263143	vret	0.241936	0.949673	0.674593	0.358639	0.158213	1.67759e-73	1.46865e-68
FBgn0038830	CG17272	0.241896	2.53703	0.93179	0.259603	0.129125	7.43626e-60	6.51007e-55
FBgn0011217	eff	0.241868	11.0791	1	0.241868	0.121931	1.63675e-56	1.43289e-51
FBgn0026370	SRPK	0.24183	3.6376	0.964956	0.250613	0.144855	3.29762e-67	2.8869e-62
FBgn0052425	CG32425	0.241759	1.07462	0.728411	0.331899	0.151772	1.83965e-70	1.61053e-65
FBgn0031682	CG5828	0.241555	1.00998	0.706508	0.3419	0.150476	7.5084e-70	6.57322e-65
FBgn0027496	epsilonCOP	0.241344	1.89487	0.87985	0.274302	0.132676	1.64764e-61	1.44242e-56
FBgn0051184	LSm3	0.241334	3.74731	0.973091	0.248008	0.155694	2.59979e-72	2.27599e-67
FBgn0262743	Fs(2)Ket	0.241181	1.97917	0.871715	0.276675	0.128633	1.25937e-59	1.10251e-54
FBgn0016978	snRNP-U1-70K	0.241151	2.40106	0.921777	0.261616	0.174508	3.04713e-81	2.66761e-76
FBgn0028833	Dak1	0.241128	2.27851	0.916145	0.263198	0.124473	1.08219e-57	9.47407e-53
FBgn0034646	Rae1	0.24112	2.17632	0.907384	0.265731	0.145953	1.0065e-67	8.81145e-63
FBgn0032354	CG4788	0.240997	1.10319	0.725907	0.331995	0.170716	1.95773e-79	1.71389e-74
FBgn0040347	mus81	0.240906	0.4628	0.414894	0.580645	0.198136	1.36178e-92	1.19217e-87
FBgn0038473	Ns1	0.240884	1.51473	0.836671	0.287908	0.130677	1.40756e-60	1.23225e-55
FBgn0061515	endos	0.240838	6.69643	0.993116	0.242507	0.132799	1.44421e-61	1.26433e-56
FBgn0031229	CG3436	0.240813	1.52534	0.810388	0.297158	0.166883	1.30308e-77	1.14078e-72
FBgn0033961	ND-B15	0.240707	3.47135	0.966208	0.249125	0.113275	1.65502e-52	1.44889e-47
FBgn0031772	CG13994	0.240691	1.8349	0.864831	0.278309	0.137957	5.62795e-64	4.92699e-59
FBgn0004432	Cyp1	0.24066	35.0264	1	0.24066	0.101295	5.40151e-47	4.72875e-42
FBgn0013954	Fkbp12	0.240646	27.7286	1	0.240646	0.121459	2.70925e-56	2.37181e-51
FBgn0003545	sub	0.240622	1.21052	0.765332	0.314402	0.154401	1.0593e-71	9.27365e-67
FBgn0036921	RhoGDI	0.24052	2.92427	0.945557	0.254369	0.172911	1.76021e-80	1.54097e-75
FBgn0017581	Lk6	0.240463	6.9941	0.994368	0.241825	0.130043	2.77909e-60	2.43296e-55
FBgn0020497	emb	0.240459	4.8908	0.987484	0.243507	0.126038	2.02924e-58	1.77649e-53
FBgn0263933	ebi	0.240442	1.05202	0.699625	0.343673	0.165046	9.71305e-77	8.50329e-72
FBgn0000316	cin	0.240359	1.11871	0.734043	0.327446	0.131603	5.21203e-61	4.56287e-56
FBgn0030086	CCT2	0.240341	1.83966	0.858573	0.27993	0.139661	8.97619e-65	7.85821e-60
FBgn0028343	Ankle2	0.240321	1.38787	0.789111	0.304547	0.170851	1.68781e-79	1.47759e-74
FBgn0001491	l(1)10Bb	0.240286	2.72152	0.934919	0.257013	0.135763	5.97223e-63	5.22839e-58
FBgn0024352	Stip1	0.240243	2.6172	0.918648	0.261518	0.140877	2.41979e-65	2.11841e-60
FBgn0037135	CG7414	0.24012	3.8814	0.979349	0.245183	0.102852	1.04212e-47	9.12324e-43
FBgn0040529	COX7A	0.240041	9.74192	0.999374	0.240191	0.104014	3.0481e-48	2.66845e-43
FBgn0036574	elg1	0.239764	0.992411	0.672716	0.356412	0.169704	5.93309e-79	5.19412e-74
FBgn0264693	ens	0.23958	1.76176	0.777847	0.308004	0.142164	6.03165e-66	5.28041e-61
FBgn0263987	spoon	0.239426	2.84924	0.934293	0.256264	0.135928	4.99781e-63	4.37533e-58
FBgn0010612	ATPsynG	0.23942	16.2558	1	0.23942	0.0799245	3.06349e-37	2.68193e-32
FBgn0260634	eIF4G2	0.239368	2.06622	0.886108	0.270134	0.138801	2.26806e-64	1.98558e-59
FBgn0032292	EMC3	0.239336	3.3776	0.963705	0.24835	0.134203	3.19456e-62	2.79668e-57
FBgn0039943	CG17168	0.239314	1.31338	0.775344	0.308655	0.147562	1.76306e-68	1.54347e-63
FBgn0026418	Hsc70Cb	0.239296	4.34777	0.974969	0.24544	0.123734	2.38339e-57	2.08654e-52
FBgn0035252	CG7970	0.239231	2.09215	0.897372	0.266591	0.13489	1.5259e-62	1.33585e-57
FBgn0015781	P5cr	0.239123	0.63101	0.533792	0.44797	0.163282	6.6661e-76	5.83583e-71
FBgn0029133	REG	0.239071	4.61533	0.991239	0.241184	0.15476	7.1755e-72	6.28179e-67
FBgn0020238	14-3-3epsilon	0.238952	26.1746	1	0.238952	0.120275	9.58526e-56	8.39141e-51
FBgn0035473	mge	0.23887	3.3822	0.972466	0.245633	0.153621	2.47157e-71	2.16374e-66
FBgn0031148	Cbs	0.238861	1.02639	0.694618	0.343874	0.164012	3.00499e-76	2.63072e-71
FBgn0025814	Mgstl	0.238778	1.01127	0.698999	0.3416	0.156688	8.81353e-73	7.7158e-68
FBgn0035122	mRpL17	0.23862	1.52812	0.822278	0.290194	0.121619	2.28201e-56	1.99779e-51
FBgn0037377	CG1218	0.238513	1.20326	0.755945	0.315516	0.197386	3.13729e-92	2.74654e-87
FBgn0038100	Paip2	0.238404	2.18667	0.819775	0.290816	0.122446	9.44394e-57	8.2677e-52
FBgn0052350	Vps11	0.238303	0.638025	0.510013	0.467249	0.207645	3.33539e-97	2.91997e-92
FBgn0003447	sn	0.238232	1.684	0.847935	0.280956	0.212822	1.00446e-99	8.79351e-95
FBgn0034249	RhoGAP54D	0.2382	0.940175	0.660826	0.360458	0.152214	1.13954e-70	9.97614e-66
FBgn0037235	CG1103	0.238177	2.05155	0.89612	0.265787	0.152726	6.53238e-71	5.71877e-66
FBgn0023514	CG14805	0.238127	1.63644	0.842929	0.2825	0.132283	2.51275e-61	2.19978e-56
FBgn0026257	cav	0.238125	1.5635	0.842303	0.282707	0.146802	4.01607e-68	3.51587e-63
FBgn0036918	Pfdn6	0.237921	3.56053	0.956821	0.248658	0.113807	9.4009e-53	8.23001e-48
FBgn0030873	CG15814	0.237411	1.21833	0.769086	0.308693	0.177238	1.514e-82	1.32543e-77
FBgn0031830	COX5B	0.237286	12.266	1	0.237286	0.0873282	1.31385e-40	1.15021e-35
FBgn0261791	SNRPG	0.237251	10.9251	1	0.237251	0.116163	7.66871e-54	6.71357e-49
FBgn0015320	Ubc2	0.237245	2.03102	0.869837	0.272746	0.145172	2.34139e-67	2.04977e-62
FBgn0015283	Rpn10	0.237205	3.69936	0.969962	0.24455	0.127613	3.75854e-59	3.29041e-54
FBgn0015379	dod	0.237188	3.83309	0.973091	0.243747	0.128292	1.81525e-59	1.58916e-54
FBgn0028734	Fmr1	0.237163	1.16852	0.727785	0.32587	0.156376	1.23774e-72	1.08358e-67
FBgn0022943	Cbp20	0.237142	3.76817	0.974343	0.243386	0.121928	1.64215e-56	1.43762e-51
FBgn0036263	thoc6	0.237137	1.58911	0.846683	0.280078	0.149564	2.01727e-69	1.76602e-64
FBgn0003701	thr	0.237079	1.09794	0.675219	0.351114	0.131016	9.78653e-61	8.56762e-56
FBgn0250754	CG42232	0.236715	1.4179	0.802253	0.295063	0.124787	7.73354e-58	6.77033e-53
FBgn0026576	Pisd	0.236433	1.13852	0.727159	0.325146	0.151563	2.30768e-70	2.02026e-65
FBgn0034118	Nup62	0.236403	2.97485	0.954944	0.247557	0.122176	1.25989e-56	1.10297e-51
FBgn0036510	SCCRO	0.236317	1.80377	0.85607	0.276048	0.136552	2.55488e-63	2.23667e-58
FBgn0266409	CG45049	0.236187	5.6029	0.991865	0.238124	0.123709	2.44731e-57	2.14249e-52
FBgn0284436	CCT8	0.236147	3.1534	0.956195	0.246965	0.124563	9.83234e-58	8.60772e-53
FBgn0036248	ssp	0.236076	1.4273	0.800375	0.294957	0.156608	9.61684e-73	8.41907e-68
FBgn0044510	mRpS5	0.235973	0.978471	0.663955	0.355405	0.148295	7.97487e-69	6.9816e-64
FBgn0261954	east	0.235942	2.03151	0.874844	0.269696	0.122697	7.22337e-57	6.3237e-52
FBgn0035141	Cypl	0.235888	1.92479	0.881727	0.26753	0.150603	6.53772e-70	5.72345e-65
FBgn0026751	XRCC1	0.23582	0.813642	0.606383	0.388896	0.176114	5.21738e-82	4.56755e-77
FBgn0001624	dlg1	0.235724	1.86453	0.857322	0.274954	0.139947	6.5945e-65	5.77316e-60
FBgn0040773	COX7C	0.235703	9.98511	0.999374	0.235851	0.0778055	2.80488e-36	2.45553e-31
FBgn0029718	mRpL30	0.235526	2.40377	0.932416	0.252598	0.116874	3.59502e-54	3.14726e-49
FBgn0051460	CG31460	0.235507	1.96636	0.886733	0.265589	0.180148	6.14514e-84	5.37976e-79
FBgn0033317	CG8635	0.235506	2.34824	0.917397	0.256711	0.104174	2.57357e-48	2.25304e-43
FBgn0011327	Uch-L5	0.235403	3.4875	0.960576	0.245064	0.147526	1.83315e-68	1.60483e-63
FBgn0265297	pAbp	0.235242	31.3687	1	0.235242	0.0842775	3.21829e-39	2.81746e-34
FBgn0030294	Pa1	0.235228	4.11748	0.97622	0.240958	0.164211	2.41871e-76	2.11746e-71
FBgn0010808	Chchd3	0.235085	2.09232	0.903004	0.260337	0.111404	1.2079e-51	1.05746e-46
FBgn0004838	Hrb27C	0.235083	13.1744	1	0.235083	0.0895913	1.22103e-41	1.06895e-36
FBgn0027537	Nup93-1	0.235081	1.07105	0.71214	0.330105	0.14362	1.25263e-66	1.09662e-61
FBgn0034232	CG4866	0.234964	2.61537	0.93617	0.250984	0.119719	1.73375e-55	1.51781e-50
FBgn0260970	Ubr3	0.234802	2.49462	0.918023	0.255769	0.130188	2.37916e-60	2.08284e-55
FBgn0011227	ox	0.234758	12.1143	1	0.234758	0.0869223	2.01122e-40	1.76073e-35
FBgn0032961	CG1416	0.234664	2.45402	0.916771	0.255968	0.141423	1.34219e-65	1.17502e-60
FBgn0260944	Rbp1	0.234388	7.15402	0.996871	0.235124	0.085823	6.37035e-40	5.57692e-35
FBgn0033241	CG2915	0.234339	2.32511	0.926783	0.252852	0.116297	6.64576e-54	5.81803e-49
FBgn0028331	l(1)G0289	0.234245	1.2563	0.756571	0.309614	0.128747	1.11554e-59	9.766e-55
FBgn0000097	aop	0.234095	4.07457	0.963705	0.242912	0.175102	1.58606e-81	1.38852e-76
FBgn0035524	CG11583	0.234048	2.51173	0.933041	0.250844	0.112259	4.87154e-52	4.26479e-47
FBgn0034248	CG14483	0.233993	2.06313	0.896746	0.260935	0.111578	1.00401e-51	8.78958e-47
FBgn0025457	Bub3	0.233976	2.98027	0.954944	0.245016	0.128295	1.80916e-59	1.58382e-54
FBgn0027567	CG8108	0.23396	2.78397	0.943054	0.248087	0.138141	4.617e-64	4.04196e-59
FBgn0027081	ThrRS	0.233957	1.71667	0.856696	0.273092	0.124166	1.50155e-57	1.31454e-52
FBgn0040396	CG3939	0.233758	0.921703	0.658949	0.354744	0.14248	4.2899e-66	3.75559e-61
FBgn0010217	ATPsynbeta	0.233594	11.9634	0.999374	0.23374	0.101981	2.61696e-47	2.29101e-42
FBgn0001086	fzy	0.233584	1.96459	0.897997	0.260116	0.147426	2.04342e-68	1.78892e-63
FBgn0086443	AsnRS	0.233492	1.50474	0.79224	0.294724	0.156309	1.33219e-72	1.16627e-67
FBgn0004132	boca	0.233492	2.69259	0.948686	0.246121	0.135336	9.44852e-63	8.27171e-58
FBgn0040793	CG7630	0.233488	16.0208	1	0.233488	0.0555446	3.13464e-26	2.74422e-21
FBgn0263352	Unr	0.233413	11.4752	0.998748	0.233705	0.0928916	3.80228e-43	3.32871e-38
FBgn0035631	Txl	0.233306	1.91748	0.878598	0.265543	0.126595	1.11784e-58	9.78617e-54
FBgn0037188	CG7369	0.233298	1.15753	0.727785	0.320558	0.213672	3.86668e-100	3.38508e-95
FBgn0030507	CG11164	0.233187	0.811584	0.591364	0.39432	0.185918	1.05212e-86	9.21082e-82
FBgn0261790	SmE	0.233181	10.6796	0.999374	0.233327	0.104325	2.19223e-48	1.91919e-43
FBgn0015737	Hmu	0.233071	1.56973	0.834168	0.279405	0.158078	1.94255e-73	1.7006e-68
FBgn0034986	mRpS17	0.233016	2.65178	0.94368	0.246922	0.119473	2.25451e-55	1.97371e-50
FBgn0000575	emc	0.233003	4.79219	0.961827	0.242251	0.186855	3.7307e-87	3.26604e-82
FBgn0038065	Snx3	0.232776	2.37332	0.92428	0.251846	0.131735	4.52414e-61	3.96066e-56
FBgn0028992	sds22	0.232717	1.72092	0.859825	0.270657	0.120038	1.23433e-55	1.08059e-50
FBgn0031670	SelT	0.232713	5.06385	0.989987	0.235067	0.0981154	1.54923e-45	1.35628e-40
FBgn0033570	ND-B14	0.232659	3.78003	0.977472	0.238022	0.10208	2.35697e-47	2.06341e-42
FBgn0031886	Nuf2	0.232629	1.59642	0.841051	0.276593	0.143272	1.82471e-66	1.59744e-61
FBgn0035642	CG18586	0.232572	0.56775	0.474343	0.490304	0.165	1.02074e-76	8.93606e-72
FBgn0011455	ND-SGDH	0.232533	5.91406	0.996871	0.233263	0.105515	6.22272e-49	5.44768e-44
FBgn0031228	ND-15	0.232363	3.88961	0.980601	0.23696	0.0889197	2.47212e-41	2.16422e-36
FBgn0038601	CG18600	0.232347	1.28687	0.767209	0.302847	0.116821	3.80522e-54	3.33128e-49
FBgn0260991	Incenp	0.232336	2.81636	0.946183	0.245551	0.161005	7.9973e-75	7.00124e-70
FBgn0028984	Spn88Ea	0.232333	1.09938	0.735294	0.315972	0.13147	6.01322e-61	5.26428e-56
FBgn0039265	CG11790	0.232325	1.36587	0.792866	0.293019	0.116717	4.25176e-54	3.7222e-49
FBgn0034368	zda	0.232117	2.27756	0.919274	0.2525	0.113367	1.5006e-52	1.3137e-47
FBgn0035046	ND-19	0.231985	3.66007	0.97184	0.238707	0.0959233	1.56238e-44	1.36778e-39
FBgn0016685	Nlp	0.23193	11.5462	0.999374	0.232076	0.0979163	1.91127e-45	1.67323e-40
FBgn0283438	CG46280	0.23188	1.24692	0.779725	0.297387	0.179402	1.39858e-83	1.22439e-78
FBgn0261270	SelD	0.231829	3.44216	0.96433	0.240404	0.156588	9.82704e-73	8.60309e-68
FBgn0028411	Nxt1	0.231759	6.58541	0.998748	0.232049	0.0905853	4.29756e-42	3.7623e-37
FBgn0000559	eEF2	0.231613	17.7283	1	0.231613	0.0712729	2.55126e-33	2.2335e-28
FBgn0052803	CG32803	0.231595	1.42418	0.819775	0.28251	0.12317	4.35644e-57	3.81384e-52
FBgn0035959	CG4911	0.231565	1.21002	0.697747	0.331875	0.109189	1.26768e-50	1.10979e-45
FBgn0025582	eIF3e	0.231291	4.21778	0.982478	0.235416	0.0905713	4.36121e-42	3.81802e-37
FBgn0000426	SmF	0.231106	7.98468	0.99562	0.232123	0.103841	3.65953e-48	3.20373e-43
FBgn0266101	CG44838	0.231101	2.05334	0.894869	0.258252	0.144773	3.60407e-67	3.15519e-62
FBgn0031996	CG8460	0.231025	1.186	0.757196	0.305106	0.134707	1.85914e-62	1.62759e-57
FBgn0035469	CG14977	0.230647	1.66937	0.837297	0.275466	0.118585	5.80624e-55	5.08307e-50
FBgn0032586	Tpr2	0.230465	1.5385	0.822904	0.280064	0.114956	2.77145e-53	2.42626e-48
FBgn0033357	Tom7	0.230374	9.39362	0.999374	0.230519	0.0861814	4.37503e-40	3.83012e-35
FBgn0029888	ND-ASHI	0.230351	3.08423	0.968085	0.237945	0.114613	3.99127e-53	3.49416e-48
FBgn0029094	asf1	0.230273	1.53454	0.821026	0.28047	0.139228	1.43197e-64	1.25362e-59
FBgn0029714	CG3527	0.230232	2.19933	0.890488	0.258546	0.125641	3.10218e-58	2.7158e-53
FBgn0028737	eEF1beta	0.230071	36.904	1	0.230071	0.0415844	5.665e-20	4.95943e-15
FBgn0260012	pds5	0.229962	1.01794	0.697747	0.329577	0.154484	9.68552e-72	8.47919e-67
FBgn0037538	CG3223	0.229919	1.38518	0.786608	0.292292	0.124854	7.20034e-58	6.30354e-53
FBgn0285937	Rab1	0.229836	4.25118	0.978723	0.234832	0.117202	2.53456e-54	2.21888e-49
FBgn0025839	ND-B14.5A	0.229835	2.27005	0.918648	0.250189	0.104404	2.01718e-48	1.76594e-43
FBgn0087039	Sbp2	0.229824	0.786812	0.601377	0.382163	0.156888	7.09328e-73	6.20981e-68
FBgn0030584	CG14407	0.229714	2.27009	0.923655	0.248701	0.117852	1.2684e-54	1.11042e-49
FBgn0267330	KdelR	0.22967	3.37786	0.965582	0.237856	0.132351	2.33528e-61	2.04442e-56
FBgn0266711	EloC	0.229642	5.91605	0.99562	0.230653	0.077543	3.68956e-36	3.23003e-31
FBgn0030871	CG8142	0.229592	1.12564	0.722778	0.317651	0.149243	2.85551e-69	2.49986e-64
FBgn0260789	mxc	0.229583	1.14086	0.702128	0.326981	0.166541	1.89372e-77	1.65785e-72
FBgn0036728	UQCR-Q	0.229574	16.6448	1	0.229574	0.0716946	1.64449e-33	1.43967e-28
FBgn0260049	flr	0.229549	1.00207	0.658323	0.348687	0.188052	9.91962e-88	8.68413e-83
FBgn0014020	Rho1	0.229421	6.51202	0.996245	0.230285	0.127307	5.2138e-59	4.56442e-54
FBgn0031021	ND-18	0.229376	2.42804	0.926783	0.247496	0.0966714	7.10196e-45	6.21741e-40
FBgn0040931	CG9034	0.229366	3.51458	0.977472	0.234652	0.0960642	1.34674e-44	1.17901e-39
FBgn0031505	ND-B14.5B	0.229314	3.67193	0.968085	0.236874	0.0965385	8.1701e-45	7.15252e-40
FBgn0022238	lolal	0.229178	10.2386	0.999374	0.229321	0.0884123	4.21128e-41	3.68676e-36
FBgn0002924	ncd	0.229044	2.05038	0.892365	0.25667	0.172464	2.87728e-80	2.51892e-75
FBgn0001989	ND-B17	0.229006	3.65135	0.970588	0.235946	0.0962823	1.07029e-44	9.36982e-40
FBgn0038964	Nop56	0.228881	5.98637	0.98811	0.231636	0.0847761	1.90881e-39	1.67107e-34
FBgn0035271	CG2021	0.228737	3.08779	0.953066	0.240001	0.118669	5.31043e-55	4.64902e-50
FBgn0028688	Rpn7	0.228695	2.26432	0.898623	0.254495	0.124176	1.48672e-57	1.30155e-52
FBgn0262169	magu	0.228643	0.506511	0.471214	0.485222	0.200552	9.21859e-94	8.07041e-89
FBgn0024984	CG3457	0.228491	0.846351	0.653317	0.34974	0.165796	4.2767e-77	3.74404e-72
FBgn0027949	msb1l	0.228447	2.95226	0.954944	0.239225	0.121986	1.54267e-56	1.35053e-51
FBgn0015828	TfIIEalpha	0.228428	1.5731	0.828536	0.275701	0.109858	6.23458e-51	5.45806e-46
FBgn0034877	levy	0.228332	9.74098	0.999374	0.228475	0.0755511	2.95121e-35	2.58363e-30
FBgn0036804	Sgf11	0.228303	1.43834	0.824781	0.276805	0.126253	1.61112e-58	1.41045e-53
FBgn0020633	Mcm7	0.228273	2.07791	0.899875	0.253672	0.126683	1.01751e-58	8.90779e-54
FBgn0037150	CG7133	0.228158	1.12279	0.733417	0.31109	0.160262	1.79925e-74	1.57515e-69
FBgn0039274	CG11920	0.228123	1.43241	0.805382	0.283248	0.124401	1.16826e-57	1.02275e-52
FBgn0010235	Klc	0.228082	0.851683	0.614518	0.371156	0.133626	5.93984e-62	5.20003e-57
FBgn0029687	Vap33	0.228064	9.32857	1	0.228064	0.105976	3.8182e-49	3.34264e-44
FBgn0033523	CG12895	0.228015	1.65329	0.853567	0.267132	0.133508	6.74083e-62	5.90126e-57
FBgn0032030	Wdr82	0.227951	1.66758	0.84418	0.270026	0.13473	1.81225e-62	1.58654e-57
FBgn0035160	hng3	0.227933	0.905792	0.658949	0.345904	0.132752	1.51837e-61	1.32925e-56
FBgn0036623	Agpat3	0.227924	1.94094	0.861702	0.264504	0.141902	8.00182e-66	7.00519e-61
FBgn0037372	CG2091	0.227786	2.23762	0.914268	0.249145	0.130072	2.69367e-60	2.35818e-55
FBgn0028429	I-2	0.227462	1.48067	0.80413	0.282867	0.132064	3.17869e-61	2.78279e-56
FBgn0039802	dj-1beta	0.227281	2.43005	0.92428	0.245901	0.117148	2.68503e-54	2.35061e-49
FBgn0030089	AP-1gamma	0.227274	0.897351	0.640801	0.354672	0.168286	2.80587e-78	2.4564e-73
FBgn0032720	mRpL13	0.227247	1.66668	0.857322	0.265066	0.115865	1.05282e-53	9.21694e-49
FBgn0005671	Vha55	0.227234	1.72419	0.842303	0.269777	0.12235	1.04622e-56	9.15914e-52
FBgn0023167	SmD3	0.227218	6.19587	0.993742	0.228649	0.110535	3.03878e-51	2.6603e-46
FBgn0266449	Kr-h2	0.227156	2.2772	0.89612	0.253489	0.108077	4.12516e-50	3.61137e-45
FBgn0016038	Vsp37A	0.227062	1.41319	0.809136	0.280622	0.113748	1.00145e-52	8.7672e-48
FBgn0086706	pix	0.226532	3.47679	0.970588	0.233397	0.111986	6.51221e-52	5.70112e-47
FBgn0044030	mRpS14	0.226399	2.56347	0.933041	0.242646	0.102162	2.1602e-47	1.89114e-42
FBgn0037878	CG6693	0.226281	1.87423	0.877972	0.257732	0.107311	9.2855e-50	8.12899e-45
FBgn0032242	CG5355	0.226232	1.57392	0.839174	0.269589	0.125806	2.60106e-58	2.2771e-53
FBgn0037608	mRpL19	0.226175	2.35225	0.919274	0.246037	0.104065	2.88885e-48	2.52904e-43
FBgn0004907	14-3-3zeta	0.226158	15.6748	1	0.226158	0.0538631	1.78426e-25	1.56203e-20
FBgn0035107	mri	0.226145	1.93471	0.892991	0.253244	0.144891	3.17278e-67	2.77761e-62
FBgn0069242	eca	0.226138	3.58276	0.971214	0.232841	0.089561	1.26052e-41	1.10352e-36
FBgn0002622	RpS3	0.226075	32.2303	1	0.226075	0.0339604	1.44564e-16	1.26559e-11
FBgn0011837	Tis11	0.226067	6.36519	0.991865	0.227921	0.0936523	1.70757e-43	1.49489e-38
FBgn0032815	CG10462	0.226031	1.03448	0.710263	0.318236	0.118743	4.91114e-55	4.29946e-50
FBgn0261789	SmD2	0.22601	7.20378	0.999374	0.226151	0.106482	2.23422e-49	1.95595e-44
FBgn0085203	CG34174	0.226008	1.092	0.730288	0.309477	0.11686	3.65159e-54	3.19678e-49
FBgn0036090	CG8009	0.226	1.38469	0.787234	0.287082	0.12591	2.32548e-58	2.03585e-53
FBgn0001995	mRpL4	0.225993	1.37705	0.785982	0.287529	0.126375	1.41367e-58	1.2376e-53
FBgn0013770	Cp1	0.225931	3.505	0.963705	0.23444	0.0954501	2.57194e-44	2.2516e-39
FBgn0028684	Rpt5	0.225788	2.01537	0.876095	0.257721	0.118788	4.67682e-55	4.09432e-50
FBgn0001308	Khc	0.225593	1.26843	0.759074	0.297195	0.136815	1.92369e-63	1.68409e-58
FBgn0039403	Sld5	0.225587	1.09995	0.731539	0.308374	0.111927	6.93174e-52	6.06839e-47
FBgn0031057	Ubqn	0.225568	1.42718	0.809762	0.278561	0.132042	3.25327e-61	2.84808e-56
FBgn0087021	Spc25	0.225545	1.26489	0.771589	0.292312	0.171165	1.19627e-79	1.04728e-74
FBgn0038437	Sdhaf3	0.225324	1.35087	0.794743	0.283518	0.104606	1.62826e-48	1.42546e-43
FBgn0001977	CIAPIN1	0.225034	1.37553	0.782854	0.287453	0.130472	1.75378e-60	1.53535e-55
FBgn0037722	CG8319	0.225023	0.898309	0.646433	0.348099	0.129807	3.58146e-60	3.13539e-55
FBgn0028836	CSN7	0.224997	2.44478	0.929912	0.241955	0.117865	1.25094e-54	1.09513e-49
FBgn0032229	CG5045	0.224925	2.15473	0.902378	0.249258	0.102858	1.0348e-47	9.05915e-43
FBgn0266666	Sem1	0.224898	7.84374	0.998123	0.225321	0.0859674	5.47561e-40	4.79362e-35
FBgn0005411	U2af50	0.22479	3.44231	0.97622	0.230266	0.167352	7.79208e-78	6.82157e-73
FBgn0019624	COX5A	0.224707	10.9401	0.999374	0.224848	0.0625597	2.18738e-29	1.91495e-24
FBgn0035805	CG7506	0.224698	1.3437	0.784105	0.286566	0.1088	1.91604e-50	1.6774e-45
FBgn0285950	RpL19	0.224623	64.9502	1	0.224623	0.0250569	1.36561e-12	1.19552e-07
FBgn0037696	GstZ1	0.224603	0.549852	0.485607	0.462519	0.149449	2.28551e-69	2.00085e-64
FBgn0026250	eIF1A	0.224597	6.6191	0.998123	0.225019	0.0800973	2.55708e-37	2.2386e-32
FBgn0035206	CG9186	0.224587	0.910719	0.658949	0.340827	0.129726	3.90623e-60	3.41971e-55
FBgn0039406	RpL34a	0.224583	12.3172	1	0.224583	0.0490082	2.68827e-23	2.35345e-18
FBgn0004177	mts	0.224572	17.1268	1	0.224572	0.0586559	1.25155e-27	1.09567e-22
FBgn0003279	RpL4	0.224541	26.5105	1	0.224541	0.0259187	5.62938e-13	4.92824e-08
FBgn0263911	COX8	0.224499	11.1547	0.998123	0.224921	0.0474007	1.41188e-22	1.23603e-17
FBgn0030269	CDK2AP1	0.224477	2.09881	0.896746	0.250324	0.112927	2.39506e-52	2.09676e-47
FBgn0283649	elgi	0.224143	1.10122	0.677096	0.331035	0.129995	2.92667e-60	2.56215e-55
FBgn0052446	Atox1	0.224078	1.17508	0.723404	0.309754	0.113578	1.19974e-52	1.05031e-47
FBgn0027087	HisRS	0.223927	1.22817	0.7597	0.294758	0.12889	9.5695e-60	8.37761e-55
FBgn0011762	DNApol-alpha50	0.223869	0.852582	0.628285	0.356318	0.14365	1.2121e-66	1.06113e-61
FBgn0030603	CG5541	0.223566	0.564074	0.493742	0.4528	0.151732	1.92124e-70	1.68195e-65
FBgn0031947	CG7154	0.223548	2.94218	0.937422	0.238471	0.115571	1.43942e-53	1.26014e-48
FBgn0039350	jigr1	0.223505	4.3626	0.977472	0.228656	0.202227	1.42364e-94	1.24633e-89
FBgn0015778	rin	0.223486	10.285	1	0.223486	0.0846724	2.12786e-39	1.86283e-34
FBgn0034948	PPP1R15	0.223462	1.37047	0.784731	0.284762	0.133924	4.3109e-62	3.77398e-57
FBgn0015925	csul	0.223393	1.04676	0.722153	0.309343	0.131535	5.61083e-61	4.91201e-56
FBgn0011692	pav	0.223383	1.76376	0.847935	0.263443	0.119537	2.1042e-55	1.84212e-50
FBgn0053554	Nipped-A	0.22335	0.993824	0.668961	0.333876	0.122745	6.86106e-57	6.00652e-52
FBgn0034179	CG6805	0.223336	1.20197	0.734668	0.303996	0.134509	2.30003e-62	2.01356e-57
FBgn0027553	NELF-B	0.223222	0.858238	0.630788	0.353878	0.151682	2.02923e-70	1.77649e-65
FBgn0021872	Xbp1	0.223168	2.26138	0.869837	0.256563	0.107919	4.87304e-50	4.2661e-45
FBgn0261881	l(2)35Be	0.223152	1.05337	0.718398	0.310625	0.128662	1.2217e-59	1.06953e-54
FBgn0003449	snf	0.223091	3.0446	0.959324	0.23255	0.122445	9.44866e-57	8.27183e-52
FBgn0039450	Yif1	0.223042	1.37818	0.79975	0.278889	0.118262	8.19962e-55	7.17836e-50
FBgn0039537	CG5590	0.222999	1.93515	0.862954	0.258414	0.0891024	2.04044e-41	1.7863e-36
FBgn0037653	CG11982	0.222998	0.956859	0.678348	0.328737	0.135458	8.29128e-63	7.2586e-58
FBgn0053198	pen-2	0.222949	2.143	0.89612	0.248793	0.11677	4.0179e-54	3.51747e-49
FBgn0035722	CG10075	0.222927	1.27463	0.767835	0.290332	0.110554	2.97767e-51	2.6068e-46
FBgn0038271	UQCR-C1	0.222883	5.29501	0.993742	0.224286	0.0800194	2.77423e-37	2.4287e-32
FBgn0039341	CG5112	0.222862	0.842224	0.647685	0.34409	0.12284	6.1973e-57	5.42543e-52
FBgn0029885	CG3224	0.2228	3.26429	0.961202	0.231794	0.103967	3.20382e-48	2.80479e-43
FBgn0033467	Pdrg1	0.222789	0.867589	0.642678	0.346658	0.127802	3.06864e-59	2.68644e-54
FBgn0003676	CCT1	0.222759	1.79464	0.872966	0.255174	0.0992039	4.91295e-46	4.30104e-41
FBgn0020618	Rack1	0.222743	26.1595	1	0.222743	0.0336895	1.91002e-16	1.67213e-11
FBgn0038948	PSR	0.22263	2.09347	0.906133	0.245693	0.108354	3.07317e-50	2.6904e-45
FBgn0261609	eIF2alpha	0.222624	3.39539	0.966208	0.23041	0.0904554	4.92565e-42	4.31216e-37
FBgn0027492	wdb	0.222584	2.52932	0.928661	0.239683	0.106943	1.37214e-49	1.20124e-44
FBgn0042134	Capr	0.222555	1.97006	0.89174	0.249573	0.130986	1.0109e-60	8.84994e-56
FBgn0034577	cpa	0.222495	1.67297	0.843554	0.263759	0.10927	1.16427e-50	1.01926e-45
FBgn0265512	mlt	0.222371	0.556785	0.48811	0.455576	0.181375	1.58804e-84	1.39025e-79
FBgn0027499	wde	0.222262	2.69614	0.921777	0.241123	0.133069	1.07989e-61	9.45387e-57
FBgn0264357	SNF4Agamma	0.222082	1.38548	0.793492	0.27988	0.110782	2.33756e-51	2.04641e-46
FBgn0032906	RPA2	0.22208	1.39318	0.765332	0.290175	0.105236	8.35879e-49	7.3177e-44
FBgn0267824	PRAS40	0.221835	1.29332	0.697121	0.318215	0.135456	8.30872e-63	7.27387e-58
FBgn0032634	Rpb11	0.221686	4.28962	0.982478	0.22564	0.0966087	7.58719e-45	6.64221e-40
FBgn0037102	CRIF	0.221682	1.80126	0.865457	0.256144	0.0889981	2.27682e-41	1.99324e-36
FBgn0027080	TyrRS	0.22165	1.85503	0.887359	0.249786	0.130022	2.84172e-60	2.48778e-55
FBgn0033340	CG13751	0.22154	3.12671	0.964956	0.229585	0.0838002	5.30607e-39	4.6452e-34
FBgn0003134	Pp1alpha-96A	0.221522	1.90554	0.855444	0.258956	0.0934913	2.02282e-43	1.77088e-38
FBgn0015338	CG5861	0.221506	1.9588	0.877972	0.252293	0.101679	3.59851e-47	3.15031e-42
FBgn0002780	mod	0.221422	6.8536	0.994994	0.222536	0.073418	2.72977e-34	2.38978e-29
FBgn0043455	CG5986	0.221364	2.84526	0.944931	0.234264	0.111678	9.03499e-52	7.90968e-47
FBgn0034158	CG5522	0.221332	1.39585	0.729662	0.303335	0.145061	2.63861e-67	2.30997e-62
FBgn0031008	CG8010	0.221285	1.07412	0.734043	0.301461	0.127705	3.40361e-59	2.97969e-54
FBgn0026373	RpII33	0.221224	1.84002	0.861702	0.256729	0.0990632	5.69981e-46	4.9899e-41
FBgn0262601	SmB	0.221222	8.96691	0.999374	0.221361	0.0752893	3.87809e-35	3.39508e-30
FBgn0032849	mRpS18B	0.221173	1.17115	0.7403	0.298762	0.0986691	8.63844e-46	7.56252e-41
FBgn0042138	CG18815	0.221085	1.72965	0.859825	0.257128	0.114504	4.47964e-53	3.9217e-48
FBgn0029891	Pink1	0.221046	1.20131	0.752816	0.293625	0.121822	1.83869e-56	1.60968e-51
FBgn0052521	CG32521	0.221001	0.733047	0.585732	0.377307	0.140706	2.90786e-65	2.54569e-60
FBgn0037723	SpdS	0.220948	1.43509	0.802879	0.275195	0.114792	3.29829e-53	2.88749e-48
FBgn0040389	mRpL14	0.220946	2.09793	0.899249	0.245701	0.101527	4.22675e-47	3.7003e-42
FBgn0260945	Atg1	0.220806	1.16173	0.746558	0.295766	0.126251	1.61504e-58	1.41389e-53
FBgn0039924	PIP4K	0.220713	1.24064	0.704631	0.313233	0.153353	3.30825e-71	2.89621e-66
FBgn0036538	CG15715	0.220597	3.13218	0.963705	0.228905	0.10592	4.05182e-49	3.54716e-44
FBgn0031711	CG6907	0.220468	1.17787	0.741552	0.297306	0.115183	2.17612e-53	1.90508e-48
FBgn0002873	mud	0.220395	0.919391	0.625156	0.352544	0.166576	1.82136e-77	1.59451e-72
FBgn0024733	RpL10	0.220365	84.5435	1	0.220365	0.014392	8.14529e-08	0.00713079
FBgn0030803	CG4880	0.220272	0.625946	0.526909	0.418046	0.147866	1.26958e-68	1.11145e-63
FBgn0037671	ATP6AP2	0.220154	2.07013	0.902378	0.243971	0.11104	1.77789e-51	1.55646e-46
FBgn0267910	lncRNA:CR34335	0.220049	341.917	1	0.220049	0.0230912	1.03138e-11	9.02924e-07
FBgn0023143	Uba1	0.21998	1.37789	0.783479	0.280773	0.122666	7.4643e-57	6.53462e-52
FBgn0037270	eIF3f1	0.219972	6.25395	0.996871	0.220662	0.072375	8.09455e-34	7.08638e-29
FBgn0030025	CG2147	0.219951	1.56651	0.831665	0.26447	0.110247	4.12623e-51	3.6123e-46
FBgn0004436	Ubc6	0.219776	1.84282	0.872966	0.251758	0.129669	4.14995e-60	3.63308e-55
FBgn0036696	CG14057	0.219624	2.10025	0.889237	0.24698	0.0825771	1.90986e-38	1.67199e-33
FBgn0035866	Arl5	0.219586	1.22362	0.742178	0.295868	0.136028	4.48785e-63	3.92889e-58
FBgn0037328	RpL35A	0.219147	38.9217	1	0.219147	0.0128778	3.91855e-07	0.034305
FBgn0040907	mRpL33	0.219146	3.25385	0.962453	0.227695	0.0832217	9.72536e-39	8.51407e-34
FBgn0266518	Dpit47	0.218995	1.72479	0.861076	0.254327	0.106661	1.84871e-49	1.61845e-44
FBgn0031437	Arpc5	0.218864	3.33571	0.966834	0.226372	0.0722068	9.64538e-34	8.44405e-29
FBgn0039902	Zip102B	0.218763	1.96172	0.898623	0.243442	0.126423	1.34373e-58	1.17637e-53
FBgn0011509	SrpRbeta	0.218723	1.37038	0.790363	0.276737	0.095072	3.83019e-44	3.35314e-39
FBgn0064225	RpL5	0.218636	47.033	1	0.218636	0.018369	1.33594e-09	0.000116955
FBgn0042125	CG18787	0.218567	1.3031	0.776596	0.281442	0.123499	3.06565e-57	2.68382e-52
FBgn0015221	Fer2LCH	0.218556	7.5071	0.998123	0.218967	0.0764553	1.14862e-35	1.00556e-30
FBgn0261602	RpL8	0.218458	33.9088	1	0.218458	0.0120962	8.83263e-07	0.0773253
FBgn0030520	Pdcd4	0.218402	9.9253	0.997497	0.21895	0.0925021	5.72754e-43	5.01417e-38
FBgn0261560	Thor	0.218336	5.2392	0.720901	0.302866	0.0355019	2.96228e-17	2.59333e-12
FBgn0027052	STUB1	0.218277	0.928776	0.644556	0.338648	0.161678	3.83907e-75	3.36092e-70
FBgn0039159	mRpS24	0.21822	1.75261	0.869837	0.250874	0.0929514	3.57037e-43	3.12568e-38
FBgn0032987	RpL21	0.218208	68.5932	1	0.218208	0.0123771	6.59437e-07	0.0577304
FBgn0038923	mRpL35	0.218142	1.71687	0.851064	0.256317	0.100434	1.34054e-46	1.17358e-41
FBgn0025463	Bap60	0.218112	3.45536	0.97184	0.224432	0.137634	7.97283e-64	6.97982e-59
FBgn0262782	Mdh1	0.218089	1.44044	0.71965	0.303049	0.104469	1.88299e-48	1.64846e-43
FBgn0034345	CG5174	0.21807	0.752546	0.607635	0.358884	0.12572	2.8504e-58	2.49538e-53
FBgn0263231	bel	0.217987	8.6936	0.994368	0.219222	0.064115	4.35472e-30	3.81234e-25
FBgn0029529	CG13365	0.217986	1.70582	0.856696	0.25445	0.0938894	1.33045e-43	1.16474e-38
FBgn0061492	loj	0.217913	1.50376	0.802879	0.271415	0.106429	2.36328e-49	2.06893e-44
FBgn0286788	Orc1	0.217779	0.837111	0.610763	0.356569	0.156146	1.59018e-72	1.39212e-67
FBgn0011760	ctp	0.21773	19.5895	1	0.21773	0.0501362	8.38988e-24	7.34492e-19
FBgn0085220	Ufm1	0.217652	2.05708	0.892991	0.243733	0.0725026	7.08672e-34	6.20407e-29
FBgn0035871	BI-1	0.217593	2.4409	0.927409	0.234625	0.110922	2.0151e-51	1.76412e-46
FBgn0037051	CG10565	0.217561	2.58732	0.93179	0.233487	0.0968884	5.64995e-45	4.94625e-40
FBgn0036336	ste14	0.217512	0.548603	0.461202	0.471621	0.152331	1.00369e-70	8.78683e-66
FBgn0037358	elm	0.217341	1.98614	0.888611	0.244585	0.0965408	8.15006e-45	7.13497e-40
FBgn0029174	Fkbp59	0.217247	1.71942	0.847309	0.256397	0.094923	4.4811e-44	3.92298e-39
FBgn0263144	bin3	0.217187	1.0698	0.699625	0.310434	0.130297	2.11776e-60	1.85399e-55
FBgn0040227	eIF3d1	0.217133	4.99779	0.993742	0.2185	0.0776717	3.22534e-36	2.82362e-31
FBgn0011272	RpL13	0.217117	47.7316	1	0.217117	0.00596041	0.000564602	1
FBgn0037747	CG8481	0.217069	1.3837	0.799124	0.271634	0.129671	4.14211e-60	3.62621e-55
FBgn0030692	mRpS30	0.217025	1.26374	0.754693	0.287567	0.115495	1.56062e-53	1.36625e-48
FBgn0013432	bcn92	0.216969	1.60799	0.839174	0.25855	0.106577	2.02153e-49	1.76975e-44
FBgn0037529	mRpS9	0.2168	1.73393	0.862328	0.251413	0.0893371	1.59475e-41	1.39612e-36
FBgn0035151	CG17129	0.216785	0.545433	0.48811	0.44413	0.158323	1.48818e-73	1.30283e-68
FBgn0052230	ND-MLRQ	0.216757	8.35792	0.98373	0.220342	0.0374746	3.89362e-18	3.40867e-13
FBgn0051363	Jupiter	0.216753	19.2148	1	0.216753	0.0702447	7.44203e-33	6.51512e-28
FBgn0029755	Sas10	0.216748	1.49035	0.808511	0.268083	0.107654	6.45396e-50	5.65012e-45
FBgn0263237	Cdk7	0.216726	0.939329	0.680225	0.318609	0.136395	3.0233e-63	2.64675e-58
FBgn0030616	RpL37a	0.21672	63.9642	1	0.21672	0.00920321	1.81593e-05	1
FBgn0026598	Apc2	0.21671	0.744593	0.588235	0.368406	0.141708	9.86523e-66	8.63652e-61
FBgn0000115	Arl1	0.216703	2.00042	0.890488	0.243353	0.112473	3.88282e-52	3.39921e-47
FBgn0261119	Prp19	0.216664	1.575	0.830413	0.260911	0.148	1.09817e-68	9.61393e-64
FBgn0029882	CG3226	0.216538	2.01084	0.854819	0.253314	0.121308	3.18114e-56	2.78493e-51
FBgn0045866	bai	0.216501	4.49963	0.981227	0.220643	0.0667747	2.7487e-31	2.40635e-26
FBgn0010278	Ssrp	0.216496	2.08295	0.895494	0.241761	0.0912665	2.1001e-42	1.83853e-37
FBgn0030753	rngo	0.216381	1.92409	0.881727	0.245406	0.13154	5.57581e-61	4.88134e-56
FBgn0037063	CG9391	0.216354	0.693295	0.560075	0.386294	0.126686	1.01394e-58	8.87651e-54
FBgn0053635	CG33635	0.216216	0.66051	0.54005	0.400363	0.143867	9.58869e-67	8.39442e-62
FBgn0025638	Roc1a	0.216194	9.22274	0.999374	0.216329	0.0575596	3.89512e-27	3.40998e-22
FBgn0040010	CG17493	0.21616	3.23353	0.970588	0.222711	0.126748	9.48652e-59	8.30497e-54
FBgn0027785	NP15.6	0.215779	4.15879	0.98373	0.219347	0.0589992	8.76993e-28	7.67763e-23
FBgn0032193	CG5727	0.215739	1.15469	0.736546	0.292906	0.127119	6.38081e-59	5.58608e-54
FBgn0032346	Csl4	0.215698	1.28936	0.772841	0.279098	0.118611	5.65234e-55	4.94834e-50
FBgn0010078	RpL23	0.215688	59.992	1	0.215688	0.00315897	0.0120973	1
FBgn0031771	ND-51	0.215671	1.86103	0.875469	0.246349	0.0761647	1.55569e-35	1.36193e-30
FBgn0053113	Rtnl1	0.215586	4.08204	0.97622	0.220837	0.1342	3.20423e-62	2.80514e-57
FBgn0001142	Gs1	0.215365	1.52698	0.809762	0.265961	0.121808	1.86589e-56	1.63349e-51
FBgn0052756	CG32756	0.215284	0.955638	0.613267	0.351045	0.169781	5.45142e-79	4.77244e-74
FBgn0259982	Uxt	0.215245	0.854865	0.630788	0.341232	0.15619	1.51634e-72	1.32748e-67
FBgn0037313	CG1161	0.215223	2.56097	0.941176	0.228675	0.0885656	3.58534e-41	3.13878e-36
FBgn0030093	Bap111	0.215199	1.35777	0.801001	0.268662	0.132521	1.94501e-61	1.70276e-56
FBgn0027587	CG7028	0.215143	0.994396	0.678348	0.317157	0.157839	2.51919e-73	2.20542e-68
FBgn0032476	CG5439	0.215126	1.3985	0.788486	0.272834	0.104393	2.04014e-48	1.78604e-43
FBgn0014092	CG4278	0.215066	0.887849	0.660826	0.325451	0.136455	2.83642e-63	2.48314e-58
FBgn0037351	RpL13A	0.215011	75.8188	1	0.215011	0.00232316	0.0314253	1
FBgn0015834	eIF3i	0.214994	9.2894	0.999374	0.215128	0.047281	1.59753e-22	1.39856e-17
FBgn0003256	rl	0.214933	1.05194	0.636421	0.337722	0.142583	3.83956e-66	3.36134e-61
FBgn0035370	Non2	0.214874	5.96036	0.994368	0.216091	0.0714476	2.12689e-33	1.86198e-28
FBgn0003270	amos	0.214784	1.01176	0.390488	0.550039	0.157022	6.1322e-73	5.36843e-68
FBgn0035194	Psf1	0.214739	1.55588	0.812891	0.264167	0.103376	5.98224e-48	5.23715e-43
FBgn0015372	RabX1	0.214738	0.995242	0.692741	0.309984	0.0988681	7.00218e-46	6.13006e-41
FBgn0284245	eEF1alpha1	0.214733	144.599	1	0.214733	0.0143581	8.43636e-08	0.00738561
FBgn0014189	Hel25E	0.214712	9.92949	0.999374	0.214846	0.0866528	2.66843e-40	2.33608e-35
FBgn0013987	MAPk-Ak2	0.214676	1.00262	0.684606	0.313577	0.15874	9.44198e-74	8.26598e-69
FBgn0034645	ND-B12	0.214529	4.40992	0.984981	0.2178	0.0631239	1.21819e-29	1.06647e-24
FBgn0019637	Atu	0.214525	1.58922	0.842303	0.254689	0.0950895	3.76039e-44	3.29203e-39
FBgn0032200	CG5676	0.214504	5.85837	0.993742	0.215855	0.0807558	1.28428e-37	1.12432e-32
FBgn0005593	RpL7	0.214463	60.6656	1	0.214463	0.00596964	0.000559044	1
FBgn0030733	UQCR-14	0.214392	9.70564	0.998748	0.21466	0.0364907	1.07143e-17	9.37986e-13
FBgn0051357	CG31357	0.214313	1.28691	0.762829	0.280945	0.108047	4.25662e-50	3.72646e-45
FBgn0000330	cm	0.214243	0.78534	0.598874	0.357743	0.145552	1.55216e-67	1.35883e-62
FBgn0002787	Rpn8	0.214192	1.84222	0.872966	0.245361	0.0987947	7.5666e-46	6.62418e-41
FBgn0003942	RpS27A	0.214069	64.2579	1	0.214069	0.00176415	0.0608128	1
FBgn0019957	ND-42	0.214017	2.91787	0.94806	0.225742	0.0760896	1.68244e-35	1.47289e-30
FBgn0025678	CaBP1	0.21395	3.08472	0.956821	0.223605	0.0905219	4.5934e-42	4.02129e-37
FBgn0025815	Mcm6	0.213916	1.84967	0.870463	0.245749	0.102144	2.2015e-47	1.9273e-42
FBgn0034237	eIF3b	0.21389	2.99499	0.969337	0.220656	0.076342	1.29284e-35	1.13182e-30
FBgn0016726	RpL29	0.213767	60.1794	1	0.213767	0.00230568	0.0320702	1
FBgn0013717	not	0.213727	1.18544	0.750939	0.284613	0.12483	7.38833e-58	6.46811e-53
FBgn0032635	CG15141	0.213637	1.15372	0.745307	0.286643	0.118482	6.48257e-55	5.67517e-50
FBgn0038476	kuk	0.213622	6.09011	0.996245	0.214427	0.0919373	1.03742e-42	9.08209e-38
FBgn0024491	Bin1	0.213614	4.14639	0.979975	0.217979	0.0954392	2.60184e-44	2.27778e-39
FBgn0037137	Nopp140	0.213589	1.8106	0.870463	0.245374	0.093725	1.58184e-43	1.38482e-38
FBgn0028695	Rpn1	0.213586	1.63629	0.832916	0.256431	0.0802717	2.13091e-37	1.8655e-32
FBgn0034743	RpS16	0.213561	45.007	1	0.213561	0.00409131	0.00428971	1
FBgn0266599	Hsc70-4	0.213505	28.913	1	0.213505	0.0253016	1.06179e-12	9.29546e-08
FBgn0023545	PIG-K	0.213426	1.06092	0.720275	0.296311	0.098609	9.20362e-46	8.05731e-41
FBgn0038110	CG8031	0.213325	1.39954	0.795369	0.268208	0.104736	1.42002e-48	1.24315e-43
FBgn0030788	Sap30	0.213277	2.24384	0.913016	0.233596	0.0797322	3.74569e-37	3.27916e-32
FBgn0031651	mRpL24	0.213236	1.09575	0.719024	0.296563	0.11553	1.50352e-53	1.31626e-48
FBgn0038426	mRpS33	0.213193	2.68184	0.941802	0.226367	0.0720434	1.14347e-33	1.00105e-28
FBgn0026261	bonsai	0.213178	1.41189	0.806633	0.264281	0.0836919	5.9433e-39	5.20306e-34
FBgn0015298	Srp19	0.213089	1.51691	0.822278	0.259145	0.106267	2.80636e-49	2.45682e-44
FBgn0015799	Rbf	0.213085	0.892533	0.647059	0.329313	0.11767	1.54028e-54	1.34844e-49
FBgn0004811	fs(2)ltoPP43	0.213028	1.61294	0.854819	0.249208	0.129843	3.44487e-60	3.01581e-55
FBgn0036258	eIF3l	0.213002	2.43553	0.923655	0.230608	0.0882319	5.08914e-41	4.45528e-36
FBgn0022985	qkr58E-2	0.213	1.41044	0.810388	0.262837	0.113009	2.1955e-52	1.92205e-47
FBgn0052831	CG33695	0.212972	1.55793	0.816646	0.260789	0.129696	4.03155e-60	3.52942e-55
FBgn0027101	Dyrk3	0.212944	1.48439	0.785982	0.270928	0.182017	7.81974e-85	6.84579e-80
FBgn0033571	Rpb5	0.212879	2.48486	0.928035	0.229387	0.0862675	3.99698e-40	3.49916e-35
FBgn0284243	betaTub56D	0.212786	47.6023	1	0.212786	0.0371885	5.22608e-18	4.57518e-13
FBgn0263398	Uck	0.212743	1.6726	0.843554	0.252198	0.106866	1.48748e-49	1.30221e-44
FBgn0011284	RpS4	0.212646	53.7652	1	0.212646	0.00356302	0.00769693	1
FBgn0001105	Gbeta13F	0.212576	10.6891	0.998748	0.212842	0.0623861	2.61914e-29	2.29293e-24
FBgn0023170	RpL39	0.212531	160.064	1	0.212531	0.00114684	0.130655	1
FBgn0086711	mol	0.212504	0.631308	0.418648	0.507595	0.163147	7.72818e-76	6.76563e-71
FBgn0086656	shrb	0.212429	2.29842	0.91239	0.232827	0.082475	2.12528e-38	1.86057e-33
FBgn0066084	RpL41	0.212422	133.02	1	0.212422	0.00132767	0.103871	1
FBgn0011016	SsRbeta	0.212385	2.39743	0.932416	0.22778	0.0852577	1.15221e-39	1.0087e-34
FBgn0035720	CG10077	0.212331	2.99316	0.951815	0.223081	0.0902435	6.1544e-42	5.38787e-37
FBgn0285910	VhaAC39-1	0.212284	1.52346	0.777222	0.273132	0.11031	3.86098e-51	3.3801e-46
FBgn0039857	RpL6	0.212265	54.9998	1	0.212265	0.00284991	0.0171586	1
FBgn0050105	CG30105	0.212258	1.35456	0.789737	0.268771	0.11459	4.08833e-53	3.57912e-48
FBgn0023519	mRpL16	0.21224	2.19767	0.894869	0.237175	0.0719712	1.2328e-33	1.07925e-28
FBgn0033912	RpS23	0.21217	40.2855	1	0.21217	0.005233	0.00123565	1
FBgn0003087	pim	0.212167	1.80007	0.794118	0.267173	0.103723	4.14458e-48	3.62837e-43
FBgn0010198	RpS15Aa	0.212107	31.1365	1	0.212107	0.0033783	0.00945857	1
FBgn0038834	RpS30	0.212103	31.9507	1	0.212103	0.0030715	0.0133504	1
FBgn0031040	CG14210	0.212101	2.6973	0.930538	0.227934	0.0750253	5.1078e-35	4.47163e-30
FBgn0035181	CG9205	0.21204	1.98627	0.903004	0.234816	0.101074	6.81814e-47	5.96894e-42
FBgn0015621	Clp	0.211965	1.2457	0.739049	0.286807	0.103548	4.99042e-48	4.36886e-43
FBgn0013325	RpL11	0.211917	35.5829	1	0.211917	0.00388282	0.00539859	1
FBgn0014010	Rab5	0.211827	1.61663	0.807885	0.2622	0.0974669	3.07026e-45	2.68786e-40
FBgn0086710	RpL30	0.211799	35.7388	1	0.211799	0.00503714	0.00152751	1
FBgn0030944	CG6617	0.211797	1.82991	0.862328	0.24561	0.1207	6.08936e-56	5.33093e-51
FBgn0015522	olf186-M	0.211733	0.704946	0.432416	0.489652	0.17421	4.22985e-81	3.70302e-76
FBgn0036920	CG8004	0.211672	1.04071	0.730288	0.289847	0.112217	5.09251e-52	4.45824e-47
FBgn0001197	His2Av	0.21164	31.7685	1	0.21164	0.039201	6.58926e-19	5.76857e-14
FBgn0011739	wts	0.211618	1.41247	0.760951	0.278097	0.114717	3.57047e-53	3.12577e-48
FBgn0026372	RpL23A	0.211544	46.6495	1	0.211544	0.00593965	0.000577317	1
FBgn0033261	udd	0.211536	2.17323	0.901752	0.234584	0.0868792	2.10443e-40	1.84232e-35
FBgn0034491	Hsl	0.211437	0.505382	0.461202	0.458449	0.157048	5.95626e-73	5.21441e-68
FBgn0034576	ND-B14.7	0.211399	1.63059	0.848561	0.249126	0.0846703	2.13261e-39	1.86699e-34
FBgn0020305	dbe	0.211366	1.48731	0.812891	0.260018	0.0833714	8.3141e-39	7.27857e-34
FBgn0033715	CG8490	0.2113	1.16804	0.73592	0.287124	0.101552	4.11382e-47	3.60145e-42
FBgn0010173	RpA-70	0.211136	1.27359	0.774093	0.272752	0.10623	2.91894e-49	2.55539e-44
FBgn0032160	CG4598	0.211135	1.36613	0.77597	0.272092	0.0839856	4.36965e-39	3.82541e-34
FBgn0020622	Pi3K21B	0.2111	0.884034	0.561952	0.375654	0.127406	4.69229e-59	4.10787e-54
FBgn0039929	CG11076	0.21105	1.37344	0.796621	0.264931	0.101431	4.679e-47	4.09623e-42
FBgn0285952	eEF5	0.210998	36.0601	1	0.210998	0.0245363	2.33255e-12	2.04203e-07
FBgn0261599	RpS29	0.210965	62.8001	1	0.210965	0.00415332	0.0040069	1
FBgn0261592	RpS6	0.210962	16.7136	1	0.210962	0.0162003	1.2538e-08	0.00109764
FBgn0029686	Glos	0.210891	0.550379	0.484981	0.434843	0.142411	4.62006e-66	4.04464e-61
FBgn0032518	RpL24	0.21082	46.1929	1	0.21082	0.00250066	0.0255897	1
FBgn0011737	Wee1	0.210734	0.959397	0.637672	0.330474	0.161822	3.28252e-75	2.87368e-70
FBgn0017545	RpS3A	0.210683	85.7405	1	0.210683	0.00524893	0.00121456	1
FBgn0030320	CG2247	0.210632	0.889204	0.647059	0.325523	0.124885	6.96214e-58	6.09501e-53
FBgn0034242	CG14480	0.210509	2.30877	0.916771	0.22962	0.084914	1.65188e-39	1.44614e-34
FBgn0015031	cype	0.210463	16.2672	1	0.210463	0.0172264	4.34363e-09	0.000380263
FBgn0028953	CG14478	0.210463	5.51961	0.992491	0.212055	0.0615958	5.9453e-29	5.20481e-24
FBgn0036488	CG6878	0.210451	2.39713	0.911765	0.230817	0.0829015	1.35996e-38	1.19058e-33
FBgn0031458	aph-1	0.21045	2.24313	0.90801	0.231771	0.105285	7.93935e-49	6.9505e-44
FBgn0039835	mRpL32	0.210386	1.33062	0.790363	0.266189	0.0984018	1.14525e-45	1.00261e-40
FBgn0015756	RpL9	0.210385	23.7026	1	0.210385	0.011892	1.09252e-06	0.0956444
FBgn0037262	MED31	0.210384	1.65543	0.853567	0.246476	0.0796348	4.14702e-37	3.63051e-32
FBgn0034537	DMAP1	0.21032	1.36501	0.797872	0.263601	0.124701	8.47449e-58	7.41899e-53
FBgn0039348	Npl4	0.210244	1.34049	0.775344	0.271162	0.132781	1.47191e-61	1.28858e-56
FBgn0038704	CG5316	0.210042	1.01482	0.68836	0.305134	0.111753	8.3412e-52	7.30231e-47
FBgn0031231	mRpL10	0.21002	0.940923	0.665207	0.315721	0.0999639	2.20264e-46	1.9283e-41
FBgn0029870	Marf	0.209943	1.59987	0.837297	0.250739	0.101297	5.38809e-47	4.717e-42
FBgn0003124	polo	0.209912	1.60799	0.817272	0.256844	0.119293	2.73219e-55	2.3919e-50
FBgn0036691	beg	0.209877	1.05138	0.714643	0.29368	0.0851545	1.28387e-39	1.12396e-34
FBgn0015271	Orc5	0.209856	0.882802	0.659574	0.318168	0.10539	7.10824e-49	6.22291e-44
FBgn0014026	RpL7A	0.209835	36.7967	1	0.209835	0.00302042	0.0141432	1
FBgn0010411	RpS18	0.209769	35.3214	1	0.209769	0.00252064	0.0250073	1
FBgn0034876	wmd	0.209754	2.20994	0.918648	0.228329	0.111881	7.28324e-52	6.37611e-47
FBgn0035210	msd5	0.209618	0.911078	0.672716	0.3116	0.108604	2.35819e-50	2.06448e-45
FBgn0082598	akirin	0.209568	11.5887	1	0.209568	0.0467875	2.65755e-22	2.32656e-17
FBgn0002736	mago	0.209527	3.46283	0.968711	0.216295	0.112869	2.54849e-52	2.23107e-47
FBgn0034654	eIF3k	0.209494	7.92585	0.997497	0.21002	0.0335788	2.14028e-16	1.87371e-11
FBgn0031980	RpL36A	0.209451	39.1322	1	0.209451	0.00555489	0.000873044	1
FBgn0260985	RfC4	0.209414	2.02064	0.877972	0.238521	0.0910342	2.68107e-42	2.34715e-37
FBgn0051158	Efa6	0.209386	0.679474	0.522528	0.400716	0.131875	3.8921e-61	3.40734e-56
FBgn0010770	ppan	0.209351	1.48894	0.814143	0.257142	0.0793217	5.75321e-37	5.03665e-32
FBgn0028919	CG16865	0.209336	1.06384	0.707134	0.296035	0.133933	4.26923e-62	3.7375e-57
FBgn0030136	RpS28b	0.209284	44.9233	1	0.209284	0.000743841	0.223507	1
FBgn0039140	Miro	0.209269	0.945181	0.652691	0.320624	0.156841	7.46233e-73	6.5329e-68
FBgn0052625	CG32625	0.209119	1.46387	0.814143	0.256858	0.0868367	2.20022e-40	1.92619e-35
FBgn0033691	CG8860	0.209117	10.7153	0.999374	0.209248	0.024933	1.55113e-12	1.35793e-07
FBgn0266064	GlyS	0.209097	1.06583	0.727159	0.287554	0.11873	4.97777e-55	4.35779e-50
FBgn0001104	Galphai	0.208947	8.41413	0.996245	0.209735	0.0657761	7.75823e-31	6.79194e-26
FBgn0031643	CG3008	0.208868	0.946364	0.664581	0.314286	0.132267	2.5563e-61	2.23791e-56
FBgn0035853	UbcE2M	0.208778	2.40642	0.909887	0.229455	0.100598	1.12787e-46	9.87395e-42
FBgn0033247	Nup44A	0.20872	1.64898	0.844806	0.247063	0.102769	1.13715e-47	9.95516e-43
FBgn0266581	pit	0.208648	1.32835	0.778473	0.268022	0.078414	1.4854e-36	1.3004e-31
FBgn0024986	CG3719	0.208642	1.42508	0.807885	0.258256	0.0902112	6.36686e-42	5.57387e-37
FBgn0036335	mRpL20	0.20853	1.41546	0.785982	0.265311	0.0858711	6.05702e-40	5.30262e-35
FBgn0250753	kra	0.208511	7.0232	0.996245	0.209297	0.0696204	1.42517e-32	1.24767e-27
FBgn0014879	Set	0.208495	7.75017	0.996871	0.20915	0.10594	3.97007e-49	3.4756e-44
FBgn0032293	Dpy-30L1	0.208476	1.64577	0.833542	0.250108	0.0842935	3.16478e-39	2.7706e-34
FBgn0039691	IntS11	0.208471	1.54999	0.817897	0.254886	0.0825235	2.02007e-38	1.76847e-33
FBgn0263006	SERCA	0.208466	1.43807	0.810388	0.257242	0.0861286	4.62372e-40	4.04784e-35
FBgn0004868	Gdi	0.208346	1.96405	0.887359	0.234793	0.0909242	3.0097e-42	2.63484e-37
FBgn0032000	CG8372	0.208269	2.23357	0.916145	0.227332	0.0871436	1.59454e-40	1.39594e-35
FBgn0004924	Top1	0.208248	5.45002	0.989987	0.210354	0.0545053	9.18432e-26	8.04041e-21
FBgn0010412	RpS19a	0.208245	33.3199	1	0.208245	0.000737864	0.225377	1
FBgn0033781	CG13319	0.208223	0.924788	0.664581	0.313315	0.109783	6.75593e-51	5.91448e-46
FBgn0025720	Ate1	0.208218	1.00875	0.683354	0.304699	0.150665	6.11644e-70	5.35463e-65
FBgn0030035	PIG-T	0.208057	2.44483	0.921777	0.225712	0.0878747	7.40453e-41	6.4823e-36
FBgn0270926	AsnS	0.208039	0.50248	0.456195	0.45603	0.156959	6.56445e-73	5.74685e-68
FBgn0029785	RpL35	0.207978	39.6087	1	0.207978	0.00233641	0.030945	1
FBgn0037020	Pex14	0.207951	1.59192	0.850438	0.244522	0.116308	6.5685e-54	5.75039e-49
FBgn0010265	RpS13	0.207935	73.1586	1	0.207935	0.000377993	0.385566	1
FBgn0001565	Hlc	0.207926	1.36582	0.797247	0.260805	0.104758	1.38739e-48	1.21459e-43
FBgn0040754	CG17059	0.207913	1.92875	0.87985	0.236306	0.0581948	2.01774e-27	1.76643e-22
FBgn0005533	RpS17	0.207837	32.6798	1	0.207837	0.00196911	0.0476106	1
FBgn0035541	CG15019	0.207821	6.10075	0.99562	0.208735	0.0488981	3.01178e-23	2.63666e-18
FBgn0040534	Sf3b5	0.207764	3.6865	0.954944	0.217567	0.0614671	6.79375e-29	5.94758e-24
FBgn0029594	CG14806	0.207752	1.69822	0.843554	0.246282	0.0798712	3.23921e-37	2.83577e-32
FBgn0032986	CG3262	0.207722	1.27786	0.769712	0.269869	0.128965	8.82524e-60	7.72606e-55
FBgn0032847	Taf13	0.207658	2.94199	0.944931	0.21976	0.070565	5.33176e-33	4.66769e-28
FBgn0017550	Rga	0.20765	1.53967	0.834168	0.24893	0.0979211	1.90174e-45	1.66488e-40
FBgn0052409	CG32409	0.207648	2.43719	0.921151	0.225422	0.0673711	1.47879e-31	1.2946e-26
FBgn0032974	CG3651	0.207646	1.01119	0.70025	0.29653	0.119774	1.6353e-55	1.43162e-50
FBgn0039713	RpS8	0.207591	47.437	1	0.207591	0.000264	0.468371	1
FBgn0031252	CG13690	0.207571	1.11506	0.72403	0.286689	0.128279	1.84189e-59	1.61248e-54
FBgn0261276	Opa1	0.207497	1.1432	0.738423	0.281001	0.105353	7.38789e-49	6.46773e-44
FBgn0261550	CG42668	0.207441	0.734501	0.581352	0.356825	0.130204	2.33968e-60	2.04827e-55
FBgn0033699	RpS11	0.207385	79.1672	1	0.207385	0.000129177	0.611998	1
FBgn0262801	twr	0.207346	5.29001	0.99562	0.208259	0.0534126	2.8427e-25	2.48864e-20
FBgn0022288	l(2)09851	0.207192	1.11142	0.735294	0.281781	0.110797	2.30205e-51	2.01533e-46
FBgn0027619	eIF3j	0.207114	2.04921	0.874218	0.236914	0.0764008	1.21588e-35	1.06444e-30
FBgn0266848	wap	0.207091	1.39701	0.795995	0.260167	0.126116	1.86542e-58	1.63308e-53
FBgn0033104	CG15237	0.206986	1.64911	0.836045	0.247577	0.0913264	1.97209e-42	1.72646e-37
FBgn0050423	CG30423	0.206959	3.93842	0.979975	0.211189	0.063972	5.05134e-30	4.42219e-25
FBgn0029975	spidey	0.206937	1.84311	0.878598	0.23553	0.169745	5.67052e-79	4.96426e-74
FBgn0003463	sog	0.206883	1.93617	0.458073	0.451639	0.119787	1.61241e-55	1.41159e-50
FBgn0030292	CG11752	0.206797	2.2859	0.921777	0.224346	0.063938	5.23297e-30	4.58121e-25
FBgn0083983	mRpL34	0.20679	2.82839	0.939299	0.220153	0.0495932	1.4696e-23	1.28656e-18
FBgn0026400	Noa36	0.206776	1.15734	0.731539	0.282659	0.0905087	4.65738e-42	4.0773e-37
FBgn0038167	Lkb1	0.206758	0.775563	0.602628	0.343094	0.124506	1.04402e-57	9.13983e-53
FBgn0032620	CG12288	0.20672	1.65016	0.825407	0.250446	0.0708893	3.80413e-33	3.33033e-28
FBgn0034936	Stoml2	0.20668	1.39032	0.803504	0.257223	0.0809628	1.0343e-37	9.05474e-33
FBgn0034066	CG8397	0.206532	2.86232	0.949312	0.21756	0.0807224	1.32995e-37	1.1643e-32
FBgn0053868	His2B:CG33868	0.20637	1.16786	0.462453	0.446251	0.132276	2.53066e-61	2.21547e-56
FBgn0038808	Srp14	0.20632	2.01846	0.902378	0.228641	0.0690483	2.58443e-32	2.26254e-27
FBgn0261597	RpS26	0.206249	54.1468	1	0.206249	2.61964e-07	0.981777	1
FBgn0052243	CG32243	0.20624	0.87756	0.622028	0.331561	0.101687	3.56701e-47	3.12274e-42
FBgn0286213	RpS12	0.206184	58.861	1	0.206184	0.000145817	0.589953	1
FBgn0052022	CG32022	0.20618	0.923251	0.662703	0.311119	0.0890092	2.25027e-41	1.97e-36
FBgn0039359	RpL27	0.206171	38.361	1	0.206171	6.66725e-05	0.71556	1
FBgn0039757	RpS7	0.206151	76.4421	1	0.206151	0.00141672	0.0929479	1
FBgn0025549	unc-119	0.206021	3.16087	0.923029	0.223201	0.133383	7.71305e-62	6.75239e-57
FBgn0033480	mRpL42	0.205877	2.53485	0.929912	0.221394	0.0716841	1.66251e-33	1.45545e-28
FBgn0017579	RpL14	0.205852	69.6453	1	0.205852	0.000375479	0.387151	1
FBgn0035771	Sec63	0.205711	1.02242	0.709011	0.290138	0.125949	2.23196e-58	1.95397e-53
FBgn0036746	Crtc	0.205656	1.44562	0.794743	0.25877	0.0974515	3.12052e-45	2.73186e-40
FBgn0052423	shep	0.205644	1.93858	0.877347	0.234393	0.209599	3.73437e-98	3.26926e-93
FBgn0030174	CG15312	0.205314	0.507192	0.44806	0.458229	0.132755	1.51333e-61	1.32485e-56
FBgn0010409	RpL18A	0.205305	60.5723	1	0.205305	1.8339e-06	0.951809	1
FBgn0030434	Brms1	0.205303	1.66188	0.84418	0.243199	0.137492	9.28891e-64	8.13198e-59
FBgn0011586	e(r)	0.205272	1.23452	0.768461	0.267121	0.0884578	4.0149e-41	3.51485e-36
FBgn0261113	Xrp1	0.205254	1.49058	0.620776	0.330641	0.106413	2.40401e-49	2.10459e-44
FBgn0003598	Su(var)3-7	0.205231	0.852733	0.625156	0.328288	0.148134	9.4953e-69	8.31266e-64
FBgn0029897	RpL17	0.205141	40.1565	1	0.205141	0.000504397	0.31618	1
FBgn0040512	zetaCOP	0.205102	2.90354	0.942428	0.217631	0.0671637	1.8345e-31	1.60602e-26
FBgn0053774	CG33774	0.205087	5.61784	0.992491	0.206639	0.0378901	2.53934e-18	2.22306e-13
FBgn0036581	MED10	0.204989	1.98181	0.874218	0.234483	0.0810139	9.80446e-38	8.58331e-33
FBgn0030853	ND-24	0.204985	2.0626	0.889237	0.230518	0.0774549	4.04524e-36	3.54141e-31
FBgn0010408	RpS9	0.204975	48.2158	1	0.204975	2.39801e-06	0.944904	1
FBgn0004856	Bx42	0.204919	2.34023	0.927409	0.220958	0.121329	3.11031e-56	2.72292e-51
FBgn0285948	RpL27A	0.204838	103.204	1	0.204838	0.000985421	0.161187	1
FBgn0015521	RpS21	0.204819	48.2426	1	0.204819	0.000458054	0.339488	1
FBgn0031661	Gmd	0.204817	0.965343	0.67209	0.304746	0.147618	1.65989e-68	1.45315e-63
FBgn0036376	Liprin-beta	0.204729	0.939515	0.665832	0.307479	0.100839	8.73929e-47	7.65081e-42
FBgn0028398	Taf10	0.20472	2.86229	0.941176	0.217515	0.0562645	1.48839e-26	1.30301e-21
FBgn0004403	RpS14a	0.204655	20.8443	1	0.204655	0.00201514	0.0450856	1
FBgn0031270	CG13689	0.204612	1.1873	0.740926	0.276157	0.0850232	1.47333e-39	1.28983e-34
FBgn0032251	Nse4	0.204604	0.850425	0.625782	0.326958	0.116368	6.16395e-54	5.39623e-49
FBgn0022023	eIF3h	0.204591	4.50213	0.986859	0.207316	0.0549705	5.67686e-26	4.96981e-21
FBgn0261596	RpS24	0.204482	46.388	1	0.204482	0.000564165	0.289113	1
FBgn0002521	pho	0.204467	1.05582	0.6602	0.309704	0.132892	1.30622e-61	1.14353e-56
FBgn0031315	CG14341	0.204465	1.23808	0.760951	0.268697	0.07535	3.64009e-35	3.18672e-30
FBgn0030605	ND-B18	0.204456	3.27902	0.967459	0.211333	0.0604537	1.94268e-28	1.70072e-23
FBgn0026149	BCL7-like	0.204373	1.75035	0.855444	0.238908	0.104661	1.53678e-48	1.34538e-43
FBgn0086472	RpS25	0.204317	93.9599	1	0.204317	0.00115046	0.130049	1
FBgn0284442	Mcm3	0.204175	1.13156	0.72403	0.281997	0.0963927	9.52684e-45	8.34027e-40
FBgn0036333	MICAL-like	0.204134	0.476459	0.456821	0.446858	0.142004	7.17106e-66	6.27791e-61
FBgn0029629	eIF3g1	0.204121	6.13671	0.99562	0.205019	0.0349064	5.46541e-17	4.7847e-12
FBgn0029824	CG3726	0.204118	0.672168	0.543805	0.375351	0.132695	1.61461e-61	1.41351e-56
FBgn0039828	CG1542	0.204093	1.16716	0.745307	0.273838	0.095129	3.60714e-44	3.15787e-39
FBgn0262117	IntS3	0.204071	0.883039	0.64393	0.316914	0.123286	3.84668e-57	3.36757e-52
FBgn0020910	RpL3	0.204014	32.1468	1	0.204014	4.80636e-05	0.757023	1
FBgn0026741	mRpL18	0.203974	1.756	0.86796	0.235004	0.0796321	4.15868e-37	3.64072e-32
FBgn0037374	jagn	0.203914	1.25768	0.765957	0.266221	0.0901135	7.05485e-42	6.17617e-37
FBgn0030037	Miga	0.203791	0.856447	0.640175	0.318337	0.134387	2.62226e-62	2.29566e-57
FBgn0004404	RpS14b	0.203756	4.29286	0.986233	0.2066	0.0459174	6.51879e-22	5.70687e-17
FBgn0035440	CG14969	0.203652	0.820097	0.601377	0.338642	0.146477	5.7066e-68	4.99585e-63
FBgn0037874	Tctp	0.203603	19.4816	1	0.203603	0.0289135	2.59039e-14	2.26776e-09
FBgn0023521	CG3587	0.203439	0.893695	0.642053	0.316858	0.102264	1.94008e-47	1.69844e-42
FBgn0022224	ubl	0.203327	3.08286	0.957447	0.212363	0.0508416	4.04949e-24	3.54513e-19
FBgn0029873	CG3918	0.203315	1.25555	0.788486	0.257855	0.100534	1.20648e-46	1.05621e-41
FBgn0024196	robl	0.203305	2.56159	0.894869	0.227189	0.0506616	4.8768e-24	4.2694e-19
FBgn0032488	CG16812	0.203213	1.23238	0.762829	0.266394	0.133228	9.10536e-62	7.97129e-57
FBgn0016917	Stat92E	0.203201	1.15796	0.742178	0.273791	0.0955928	2.21306e-44	1.93742e-39
FBgn0024556	mEFTu1	0.203168	2.17609	0.907384	0.223905	0.0881187	5.73138e-41	5.01753e-36
FBgn0030433	mRpL49	0.203126	1.74961	0.855444	0.237451	0.0571839	5.74676e-27	5.031e-22
FBgn0033934	CG17385	0.203092	2.63145	0.945557	0.214786	0.0808402	1.17585e-37	1.0294e-32
FBgn0017567	ND-23	0.202921	1.57895	0.830413	0.244361	0.0846749	2.12231e-39	1.85798e-34
FBgn0010602	lwr	0.202854	6.76578	0.994994	0.203875	0.0412346	8.1218e-20	7.11023e-15
FBgn0037715	CG9399	0.202831	1.0557	0.702753	0.288623	0.0930361	3.26581e-43	2.85906e-38
FBgn0036462	mRpL39	0.202762	1.23286	0.758448	0.267339	0.0997258	2.83199e-46	2.47926e-41
FBgn0033925	CG8617	0.202687	0.993834	0.697747	0.290488	0.102271	1.92488e-47	1.68514e-42
FBgn0051855	CG31855	0.202645	1.95955	0.877347	0.230975	0.101257	5.62287e-47	4.92254e-42
FBgn0036826	arx	0.20254	0.841362	0.628285	0.32237	0.119242	2.8822e-55	2.52322e-50
FBgn0040623	Spase12	0.202539	3.02473	0.958073	0.211402	0.0517127	1.6467e-24	1.44161e-19
FBgn0033519	CG11825	0.202446	1.3055	0.73592	0.275092	0.110623	2.7694e-51	2.42447e-46
FBgn0002579	RpL36	0.202335	49.8376	1	0.202335	9.08187e-05	0.67062	1
FBgn0260639	gammaTub23C	0.202255	0.941932	0.677096	0.298709	0.107085	1.17948e-49	1.03257e-44
FBgn0261608	RpL37A	0.202213	44.3994	1	0.202213	0.000212284	0.515541	1
FBgn0038829	CG17271	0.202192	1.70357	0.814143	0.24835	0.109224	1.22148e-50	1.06934e-45
FBgn0003274	RpLP2	0.202182	80.3861	1	0.202182	0.00930521	1.63147e-05	1
FBgn0037340	CG14671	0.202161	1.40917	0.795369	0.254173	0.0753811	3.52415e-35	3.08522e-30
FBgn0037609	CG9773	0.202111	0.935823	0.653317	0.309362	0.111651	9.29481e-52	8.13714e-47
FBgn0039300	RpS27	0.202107	70.679	1	0.202107	0.000471788	0.332349	1
FBgn0034138	RpS15	0.202064	80.2473	1	0.202064	0.00267676	0.0209045	1
FBgn0086605	CG9853	0.202	1.29012	0.772215	0.261585	0.10218	2.11913e-47	1.85519e-42
FBgn0283741	prage	0.201902	0.46298	0.397372	0.508093	0.138951	1.92829e-64	1.68812e-59
FBgn0031909	CG5181	0.201739	1.07089	0.739049	0.272971	0.107042	1.23468e-49	1.0809e-44
FBgn0026879	CG13364	0.201663	10.587	0.999374	0.20179	0.0139359	1.30682e-07	0.0114405
FBgn0034939	thoc5	0.20164	1.0492	0.719024	0.280435	0.134386	2.62288e-62	2.2962e-57
FBgn0038723	CG6195	0.201634	1.36937	0.775344	0.260057	0.0906167	4.15775e-42	3.6399e-37
FBgn0014002	Pdi	0.201627	4.44762	0.991239	0.203409	0.0641332	4.27314e-30	3.74092e-25
FBgn0017566	ND-75	0.2015	1.3833	0.802253	0.251168	0.0843097	3.11148e-39	2.72394e-34
FBgn0031977	baf	0.201441	8.00873	0.996871	0.202073	0.0906531	4.00171e-42	3.5033e-37
FBgn0032509	CG6523	0.201415	4.04637	0.980601	0.2054	0.0535885	2.37004e-25	2.07485e-20
FBgn0052441	CG32441	0.201357	2.74954	0.946183	0.21281	0.0512078	2.77405e-24	2.42854e-19
FBgn0003261	Rm62	0.201231	10.2388	1	0.201231	0.0245125	2.39044e-12	2.09271e-07
FBgn0033122	CG17002	0.201195	1.0428	0.711514	0.282771	0.139335	1.27564e-64	1.11676e-59
FBgn0030063	CG1789	0.201124	1.71294	0.847935	0.237192	0.0811798	8.24213e-38	7.21557e-33
FBgn0061209	His2B:CG17949	0.201025	0.971262	0.427409	0.470334	0.154595	8.58505e-72	7.51578e-67
FBgn0263773	fok	0.200994	1.40678	0.663329	0.303008	0.0874649	1.13824e-40	9.96468e-36
FBgn0028554	x16	0.200965	2.89707	0.946809	0.212256	0.077748	2.97839e-36	2.60743e-31
FBgn0051108	TTLL5	0.200946	0.521038	0.460576	0.436293	0.140618	3.1974e-65	2.79916e-60
FBgn0261479	nero	0.200913	1.27777	0.727159	0.276299	0.0886086	3.42706e-41	3.00022e-36
FBgn0005624	Psc	0.200866	3.40703	0.871715	0.230426	0.0588891	9.8293e-28	8.60506e-23
FBgn0261437	CSN8	0.200788	2.39121	0.9199	0.218272	0.069575	1.49404e-32	1.30796e-27
FBgn0038738	CG4572	0.200544	1.01735	0.678974	0.295364	0.0813995	6.55022e-38	5.73439e-33
FBgn0051390	MED7	0.200376	1.95773	0.892365	0.224544	0.0772264	5.13517e-36	4.49559e-31
FBgn0019936	RpS20	0.200305	80.8863	1	0.200305	0.00627435	0.000403385	1
FBgn0040235	c12.1	0.200279	2.38495	0.939299	0.213222	0.0636617	6.97118e-30	6.10292e-25
FBgn0037686	RpL34b	0.200239	43.5876	1	0.200239	0.000779807	0.212639	1
FBgn0285947	RpS10b	0.200108	44.294	1	0.200108	1.43953e-05	0.865544	1
FBgn0085638	CG41378	0.200078	0.669923	0.55632	0.359645	0.129672	4.13633e-60	3.62115e-55
FBgn0036774	mRpS26	0.19993	1.90401	0.870463	0.229682	0.073345	2.94557e-34	2.5787e-29
FBgn0004049	yrt	0.199921	1.7605	0.85169	0.234735	0.0846252	2.23563e-39	1.95718e-34
FBgn0037489	CG1234	0.199884	1.46111	0.79975	0.249933	0.0728122	5.13278e-34	4.49349e-29
FBgn0033485	RpLP0-like	0.199852	2.5645	0.928035	0.21535	0.0511135	3.05806e-24	2.67718e-19
FBgn0030996	CG14194	0.199686	1.26412	0.781602	0.255483	0.0869154	2.02594e-40	1.77361e-35
FBgn0260407	mRpS23	0.199578	1.21068	0.742178	0.268909	0.0930934	3.0747e-43	2.69174e-38
FBgn0003607	Su(var)205	0.199546	6.08419	0.994368	0.200676	0.120002	1.28236e-55	1.12264e-50
FBgn0058006	CG40006	0.199519	0.477156	0.425532	0.468869	0.138857	2.13538e-64	1.86942e-59
FBgn0086912	mbm	0.199367	1.01136	0.692741	0.287794	0.10538	7.18139e-49	6.28694e-44
FBgn0031191	Cp110	0.199348	0.67766	0.536295	0.371713	0.117517	1.81237e-54	1.58663e-49
FBgn0003941	RpL40	0.199328	58.0359	1	0.199328	0.00474516	0.00209757	1
FBgn0004867	RpS2	0.199232	57.2216	1	0.199232	0.00568244	0.000761042	1
FBgn0027868	Nup107	0.199222	1.2158	0.756571	0.263322	0.0771296	5.6816e-36	4.97396e-31
FBgn0035753	RpL18	0.199187	42.9485	1	0.199187	0.01245	6.11312e-07	0.0535173
FBgn0047199	CG31517	0.199158	0.50031	0.463079	0.430074	0.137299	1.14339e-63	1.00098e-58
FBgn0031495	GABPI	0.199097	1.05835	0.707134	0.281555	0.100338	1.48356e-46	1.29878e-41
FBgn0035534	mRpS6	0.199051	1.37719	0.795369	0.250262	0.0678875	8.64409e-32	7.56747e-27
FBgn0036353	CG10171	0.19903	0.931255	0.664581	0.299482	0.104861	1.24381e-48	1.08889e-43
FBgn0261439	SdhA	0.199015	1.08869	0.72403	0.274871	0.0786929	1.10987e-36	9.7164e-32
FBgn0032050	CG13096	0.198786	2.20855	0.904881	0.219682	0.0453105	1.21872e-21	1.06693e-16
FBgn0284220	Top2	0.198691	2.19939	0.892365	0.222657	0.0874442	1.16324e-40	1.01836e-35
FBgn0031497	SerRS	0.198634	1.92107	0.856696	0.23186	0.0632086	1.1157e-29	9.76735e-25
FBgn0031529	CG9662	0.198621	1.22102	0.760325	0.261231	0.122444	9.46189e-57	8.28341e-52
FBgn0016078	wun	0.198614	0.711382	0.567584	0.349928	0.124979	6.30088e-58	5.51611e-53
FBgn0031623	Taf12L	0.198602	0.984775	0.43617	0.455331	0.117533	1.78262e-54	1.56059e-49
FBgn0035520	CG11586	0.198565	1.46183	0.807259	0.245974	0.0675096	1.28046e-31	1.12098e-26
FBgn0030519	CG11151	0.198317	1.08889	0.679599	0.291815	0.110131	4.66705e-51	4.08577e-46
FBgn0025716	Bap55	0.198265	2.88364	0.947434	0.209266	0.0811242	8.73606e-38	7.64799e-33
FBgn0036685	CG6664	0.198155	0.898189	0.648936	0.305354	0.104716	1.44955e-48	1.26901e-43
FBgn0033712	mIF3	0.198109	0.57279	0.511264	0.387488	0.127729	3.31963e-59	2.90617e-54
FBgn0031739	CG14005	0.198084	0.954031	0.697747	0.283891	0.108657	2.22859e-50	1.95102e-45
FBgn0002626	RpL32	0.198049	41.6675	1	0.198049	0.00602139	0.000528869	1
FBgn0085412	CG34383	0.198037	1.9315	0.766583	0.258338	0.106165	3.12647e-49	2.73707e-44
FBgn0023212	EloB	0.197882	1.12728	0.742804	0.266399	0.0950563	3.89421e-44	3.40918e-39
FBgn0032938	CG8671	0.197881	2.27108	0.900501	0.219745	0.0769253	7.03231e-36	6.15643e-31
FBgn0032429	CG5446	0.19786	1.87985	0.85169	0.232315	0.0847202	2.02391e-39	1.77183e-34
FBgn0264712	CG1172	0.197819	1.00274	0.6602	0.299635	0.115123	2.31988e-53	2.03094e-48
FBgn0035102	CG7049	0.197787	0.848754	0.645807	0.306264	0.0928514	3.96637e-43	3.47236e-38
FBgn0032643	GCS2beta	0.19771	1.25889	0.760325	0.260033	0.0880195	6.36034e-41	5.56816e-36
FBgn0030311	CG11699	0.197641	3.22841	0.959324	0.206021	0.0528099	5.29987e-25	4.63977e-20
FBgn0031253	CG11885	0.197452	1.11743	0.738423	0.267396	0.0818892	3.92386e-38	3.43514e-33
FBgn0030738	CG9915	0.197438	1.29814	0.772841	0.25547	0.126013	2.08448e-58	1.82486e-53
FBgn0038662	Mpc1	0.197293	0.927465	0.6602	0.298838	0.106297	2.71914e-49	2.38047e-44
FBgn0000259	CkIIbeta	0.197155	2.62794	0.923029	0.213596	0.0446456	2.4187e-21	2.11745e-16
FBgn0000611	exd	0.19708	1.72367	0.857947	0.229711	0.0854906	9.02588e-40	7.9017e-35
FBgn0029665	CG14270	0.197052	1.36228	0.797247	0.247165	0.0776957	3.14566e-36	2.75386e-31
FBgn0029709	CHOp24	0.196861	2.43792	0.913016	0.215617	0.0942934	8.69535e-44	7.61234e-39
FBgn0000412	D1	0.196854	7.92457	0.997497	0.197348	0.046398	3.97125e-22	3.47663e-17
FBgn0037255	Fip1	0.196848	2.3856	0.924906	0.21283	0.0596929	4.27419e-28	3.74184e-23
FBgn0260439	Pp2A-29B	0.196742	1.7711	0.844806	0.232885	0.0918313	1.15975e-42	1.0153e-37
FBgn0029506	Tsp42Ee	0.196736	3.06036	0.95995	0.204944	0.106796	1.60341e-49	1.4037e-44
FBgn0285962	CG46338	0.196522	1.1435	0.731539	0.268642	0.107975	4.59399e-50	4.0218e-45
FBgn0032138	CG4364	0.196506	4.13166	0.984355	0.199629	0.0394137	5.29376e-19	4.63442e-14
FBgn0029672	CG2875	0.196487	0.938719	0.647059	0.303662	0.116283	6.744e-54	5.90404e-49
FBgn0032698	CG10336	0.196448	0.990097	0.665832	0.295041	0.12813	2.15928e-59	1.89034e-54
FBgn0003391	shg	0.196391	1.47281	0.772215	0.254321	0.104853	1.25421e-48	1.098e-43
FBgn0022768	Pp2C1	0.19631	1.87549	0.874218	0.224555	0.0975919	2.69088e-45	2.35573e-40
FBgn0032016	Mettl14	0.196232	1.06545	0.712766	0.275311	0.0914003	1.82469e-42	1.59742e-37
FBgn0035425	CG17746	0.196086	0.897217	0.635795	0.30841	0.0942241	9.35373e-44	8.18872e-39
FBgn0031540	Pif1	0.196084	0.99911	0.668335	0.293391	0.103505	5.22207e-48	4.57166e-43
FBgn0038976	Pfdn5	0.196066	2.56456	0.916145	0.214012	0.0409735	1.06275e-19	9.30381e-15
FBgn0033669	PI31	0.195946	1.58446	0.804756	0.243484	0.111336	1.29862e-51	1.13688e-46
FBgn0003346	RanGAP	0.195735	1.93771	0.88423	0.221362	0.125639	3.10933e-58	2.72207e-53
FBgn0038046	CG5641	0.195693	1.62023	0.8398	0.233023	0.0950627	3.8679e-44	3.38616e-39
FBgn0033897	Rcd1	0.195638	1.02121	0.695244	0.281395	0.117459	1.92927e-54	1.68898e-49
FBgn0036020	CG8336	0.195616	1.04276	0.705257	0.277368	0.0972823	3.72972e-45	3.26518e-40
FBgn0037899	RpL24-like	0.195602	8.14645	0.998748	0.195847	0.00828534	4.77147e-05	1
FBgn0037807	CG6293	0.195571	0.504641	0.441176	0.443295	0.124591	9.53808e-58	8.35012e-53
FBgn0036213	RpL10Ab	0.195553	47.7456	1	0.195553	0.00839138	4.26665e-05	1
FBgn0035592	CG10674	0.195501	1.74285	0.852315	0.229376	0.0579521	2.59405e-27	2.27096e-22
FBgn0033179	p47	0.195431	1.28779	0.777222	0.251449	0.078599	1.2243e-36	1.07181e-31
FBgn0020496	CtBP	0.195425	7.58658	0.998123	0.195793	0.0386835	1.12238e-18	9.82589e-14
FBgn0037875	ZnT86D	0.195374	0.857477	0.63204	0.309116	0.0931137	3.00976e-43	2.63489e-38
FBgn0023527	CG3071	0.195366	1.29068	0.770338	0.253611	0.0827709	1.55924e-38	1.36504e-33
FBgn0035558	CG11357	0.195364	0.832349	0.623279	0.313446	0.123954	1.88502e-57	1.65024e-52
FBgn0034504	CG8929	0.195266	1.86538	0.858573	0.227431	0.102417	1.64984e-47	1.44435e-42
FBgn0037134	CG7407	0.195186	1.43066	0.735294	0.265453	0.0672468	1.68277e-31	1.47318e-26
FBgn0027291	Idh3a	0.195117	1.68779	0.79224	0.246286	0.0790054	8.00694e-37	7.00968e-32
FBgn0015818	Spx	0.195117	1.96216	0.889862	0.219266	0.111078	1.70736e-51	1.49471e-46
FBgn0000042	Act5C	0.195045	30.9225	1	0.195045	0.0838613	4.97707e-39	4.35718e-34
FBgn0036740	Vps60	0.195043	1.55821	0.832916	0.234169	0.0675285	1.25554e-31	1.09916e-26
FBgn0284255	Arpc4	0.194981	2.66884	0.94368	0.206618	0.0375248	3.69783e-18	3.23727e-13
FBgn0046214	vig2	0.194925	3.87123	0.973717	0.200187	0.0480467	7.25016e-23	6.34715e-18
FBgn0021800	Reph	0.194768	0.768008	0.585732	0.332521	0.119504	2.18035e-55	1.90879e-50
FBgn0259742	CG42360	0.194556	1.15623	0.739049	0.263251	0.0966097	7.57886e-45	6.63491e-40
FBgn0031493	Sf3b2	0.194531	2.0482	0.896746	0.21693	0.0712387	2.64376e-33	2.31448e-28
FBgn0024326	Mkk4	0.194473	1.10354	0.742804	0.261809	0.134813	1.65804e-62	1.45153e-57
FBgn0029840	raptor	0.194405	0.874737	0.646433	0.300735	0.0930444	3.23764e-43	2.83439e-38
FBgn0283535	Vha26	0.194246	2.18214	0.858573	0.226243	0.0788061	9.8603e-37	8.6322e-32
FBgn0037822	CG14683	0.194235	1.14485	0.75219	0.258226	0.0778468	2.68649e-36	2.35189e-31
FBgn0052250	PMP34	0.194162	1.17098	0.745932	0.260294	0.0938038	1.45594e-43	1.2746e-38
FBgn0015288	RpL22	0.194143	8.79025	1	0.194143	0.0132151	2.76055e-07	0.0241673
FBgn0035907	GstO1	0.194061	0.680199	0.555695	0.349222	0.0973531	3.46161e-45	3.03046e-40
FBgn0004915	TfIIB	0.194041	1.26325	0.773467	0.250871	0.0965003	8.50519e-45	7.44587e-40
FBgn0036667	kud	0.193978	3.19458	0.954318	0.203263	0.0417406	4.82331e-20	4.22257e-15
FBgn0027779	VhaSFD	0.193924	1.13664	0.723404	0.268071	0.0819242	3.78273e-38	3.31159e-33
FBgn0030518	CG11134	0.193915	0.945598	0.675219	0.287189	0.0839109	4.72506e-39	4.13655e-34
FBgn0034086	CG8441	0.193829	1.40912	0.797247	0.243123	0.0637374	6.44412e-30	5.64151e-25
FBgn0013531	MED20	0.193774	1.08094	0.715269	0.27091	0.0797566	3.65142e-37	3.19663e-32
FBgn0053182	Kdm4B	0.193685	0.891468	0.646433	0.299621	0.102565	1.41019e-47	1.23455e-42
FBgn0028697	RpL15	0.193652	52.0694	1	0.193652	0.00179729	0.0584388	1
FBgn0033062	Ars2	0.193642	2.70694	0.94368	0.205199	0.0855473	8.50511e-40	7.4458e-35
FBgn0037369	CG2100	0.193587	0.70308	0.570713	0.339201	0.0914833	1.67219e-42	1.46392e-37
FBgn0036825	RpL26	0.193562	50.2492	1	0.193562	0.0127058	4.68536e-07	0.041018
FBgn0040066	wds	0.19355	2.05436	0.898623	0.215386	0.107952	4.70622e-50	4.12006e-45
FBgn0014455	Ahcy	0.193445	1.59056	0.829787	0.233126	0.0758658	2.12504e-35	1.86037e-30
FBgn0030669	CG9240	0.193399	1.67767	0.848561	0.227914	0.0575254	4.03552e-27	3.5329e-22
FBgn0041164	armi	0.193338	0.722913	0.585106	0.330431	0.105995	3.74237e-49	3.27626e-44
FBgn0035422	RpL28	0.19331	64.2777	1	0.19331	0.0281161	5.87925e-14	5.14699e-09
FBgn0039128	CG13599	0.193259	1.02357	0.68398	0.28255	0.10474	1.41308e-48	1.23708e-43
FBgn0285949	RpL31	0.193196	43.0135	1	0.193196	0.00988743	8.85982e-06	0.775633
FBgn0030341	p24-1	0.193176	1.4268	0.80413	0.240229	0.0763233	1.31831e-35	1.15411e-30
FBgn0033901	O-fut1	0.193164	1.07887	0.709011	0.272441	0.0848968	1.68194e-39	1.47246e-34
FBgn0010348	Arf79F	0.193115	4.59548	0.977472	0.197566	0.0540848	1.41878e-25	1.24208e-20
FBgn0085290	CG34261	0.19298	1.32359	0.781602	0.246904	0.0840344	4.15194e-39	3.63482e-34
FBgn0038922	Idh3b	0.192813	0.915818	0.642053	0.300307	0.083319	8.78289e-39	7.68898e-34
FBgn0031498	CG17260	0.192756	0.563289	0.499374	0.385995	0.105795	4.62497e-49	4.04893e-44
FBgn0040007	RpL38	0.192659	59.0096	1	0.192659	0.0151872	3.57493e-08	0.00312968
FBgn0034913	Snap29	0.192616	1.1502	0.730914	0.263528	0.0771426	5.60499e-36	4.90689e-31
FBgn0038928	Fadd	0.192579	0.479669	0.428035	0.449915	0.130143	2.49561e-60	2.18479e-55
FBgn0031268	cold	0.192542	1.05005	0.70776	0.272044	0.110274	4.00931e-51	3.50995e-46
FBgn0261976	Psf2	0.192433	0.862432	0.645181	0.298262	0.0967919	6.25472e-45	5.4757e-40
FBgn0033907	mRpS16	0.192385	1.63798	0.846683	0.227222	0.0543891	1.03575e-25	9.06744e-21
FBgn0027932	Akap200	0.192355	4.9157	0.991239	0.194055	0.0459215	6.49125e-22	5.68276e-17
FBgn0041210	HDAC4	0.192331	1.53726	0.814143	0.236238	0.0851882	1.23928e-39	1.08492e-34
FBgn0035624	Eaf6	0.19232	1.11988	0.70025	0.274644	0.118692	5.18361e-55	4.53799e-50
FBgn0026324	Taf10b	0.192292	2.71853	0.934293	0.205815	0.0524412	7.75765e-25	6.79143e-20
FBgn0002593	RpLP1	0.192254	78.2053	1	0.192254	0.015712	2.07727e-08	0.00181855
FBgn0263396	sqd	0.19213	10.1535	1	0.19213	0.00878086	2.83094e-05	1
FBgn0261108	Atg13	0.192089	1.27234	0.764706	0.251194	0.0703391	6.74517e-33	5.90506e-28
FBgn0037360	CG2182	0.19197	2.22853	0.875469	0.219277	0.0417174	4.93987e-20	4.32461e-15
FBgn0034968	RpL12	0.191943	40.8538	1	0.191943	0.00950954	1.3166e-05	1
FBgn0030863	CG8188	0.19186	1.66243	0.850438	0.225601	0.104546	1.73621e-48	1.51997e-43
FBgn0032400	CG6770	0.191792	3.68639	0.892365	0.214925	0.0830951	1.1104e-38	9.72097e-34
FBgn0024991	CG2694	0.191776	0.63666	0.511264	0.375101	0.111452	1.14858e-51	1.00553e-46
FBgn0026083	tyf	0.191687	1.50435	0.814143	0.235446	0.0900137	7.83538e-42	6.85949e-37
FBgn0011481	Ssdp	0.191614	2.48324	0.899249	0.213082	0.0793442	5.61907e-37	4.91922e-32
FBgn0034750	CG3732	0.191564	1.26397	0.777222	0.246473	0.114815	3.2189e-53	2.81798e-48
FBgn0011747	Ank	0.191502	0.609366	0.525031	0.364743	0.0968898	5.64153e-45	4.93887e-40
FBgn0032197	CG5694	0.191462	1.24037	0.722778	0.264897	0.0997545	2.74768e-46	2.40546e-41
FBgn0029936	CG4617	0.191454	0.699237	0.573217	0.334	0.115174	2.19627e-53	1.92272e-48
FBgn0033350	CG8237	0.191273	1.24876	0.769712	0.2485	0.0749884	5.30856e-35	4.64738e-30
FBgn0267378	sau	0.191248	1.02248	0.704005	0.271658	0.10024	1.64545e-46	1.44051e-41
FBgn0004638	drk	0.191207	1.5773	0.832916	0.229563	0.0924387	6.12241e-43	5.35986e-38
FBgn0035947	Srp68	0.191019	0.982929	0.690238	0.276743	0.0973163	3.59842e-45	3.15023e-40
FBgn0027095	Manf	0.191004	2.26596	0.882979	0.216318	0.0798374	3.35561e-37	2.93767e-32
FBgn0035088	CG3776	0.190686	1.9256	0.889862	0.214288	0.0663689	4.19051e-31	3.66858e-26
FBgn0035569	CG15876	0.19051	1.41985	0.342929	0.555538	0.128156	2.10059e-59	1.83896e-54
FBgn0003371	sgg	0.190452	1.82187	0.872966	0.218167	0.0552203	4.38399e-26	3.83797e-21
FBgn0030630	CG12608	0.190419	1.64431	0.840426	0.226574	0.0583717	1.6798e-27	1.47058e-22
FBgn0027055	CSN3	0.190195	0.940552	0.662703	0.286999	0.106054	3.51731e-49	3.07923e-44
FBgn0027093	ArgRS	0.190118	0.917874	0.663955	0.286342	0.103824	3.72553e-48	3.26151e-43
FBgn0260987	vtd	0.190059	1.05312	0.702753	0.270449	0.143807	1.02361e-66	8.96115e-62
FBgn0261995	CG42813	0.189976	0.64716	0.544431	0.348944	0.0959421	1.53176e-44	1.34098e-39
FBgn0036932	CG14184	0.189687	1.44193	0.786608	0.241146	0.101522	4.24629e-47	3.71742e-42
FBgn0036697	rogdi	0.189627	0.808014	0.612015	0.30984	0.110203	4.32335e-51	3.78487e-46
FBgn0025633	CG13366	0.189625	1.02253	0.68836	0.275473	0.100054	2.00178e-46	1.75246e-41
FBgn0267823	Gmer	0.189589	0.868546	0.640801	0.295863	0.108189	3.66165e-50	3.20559e-45
FBgn0032196	CG5708	0.18951	1.43733	0.794118	0.238642	0.091607	1.46816e-42	1.2853e-37
FBgn0015391	glu	0.1895	0.951327	0.669587	0.28301	0.114596	4.06386e-53	3.55771e-48
FBgn0028480	CG17841	0.18937	0.903254	0.658949	0.287381	0.101358	5.05006e-47	4.42108e-42
FBgn0030306	Spase25	0.189286	1.96207	0.863579	0.219188	0.0513686	2.34967e-24	2.05702e-19
FBgn0010438	mtSSB	0.189257	2.07973	0.887985	0.213131	0.050111	8.61095e-24	7.53846e-19
FBgn0028648	mRpL50	0.189199	1.28616	0.765332	0.247212	0.0663173	4.42142e-31	3.87073e-26
FBgn0036816	Indy	0.189196	0.806965	0.600125	0.315261	0.0795508	4.52791e-37	3.96396e-32
FBgn0039559	NSD	0.189147	0.657235	0.537547	0.351871	0.110919	2.02168e-51	1.76988e-46
FBgn0033089	CG17266	0.189092	1.2836	0.761577	0.248291	0.0783	1.67332e-36	1.46491e-31
FBgn0030329	prtp	0.189073	1.81453	0.878598	0.215198	0.162355	1.83419e-75	1.60574e-70
FBgn0038306	Art3	0.189053	0.75163	0.601377	0.314366	0.0941979	9.61582e-44	8.41817e-39
FBgn0033716	Den1	0.189026	1.44084	0.785982	0.240496	0.0626881	1.9146e-29	1.67614e-24
FBgn0038471	CG5220	0.188995	0.942611	0.669587	0.282256	0.0876913	8.97533e-41	7.85745e-36
FBgn0032290	CG6443	0.188943	1.29297	0.78035	0.242126	0.0897489	1.03479e-41	9.05911e-37
FBgn0015622	Cnx99A	0.188822	4.9528	0.993742	0.190011	0.0430202	1.29112e-20	1.13031e-15
FBgn0031904	CG5149	0.188805	0.724515	0.575094	0.328303	0.0914459	1.73925e-42	1.52263e-37
FBgn0010747	Srp54k	0.188671	1.56547	0.82791	0.227888	0.0502144	7.7389e-24	6.77502e-19
FBgn0035233	Pex10	0.188671	0.94327	0.675219	0.279422	0.0686224	4.0254e-32	3.52404e-27
FBgn0286516	aqz	0.188637	21.8982	0.999374	0.188756	0.000520778	0.308447	1
FBgn0263863	mRpL45	0.188604	1.1209	0.737797	0.255632	0.071131	2.95771e-33	2.58933e-28
FBgn0033762	ZnT49B	0.188563	0.581103	0.509387	0.370177	0.0924892	5.80601e-43	5.08287e-38
FBgn0034187	CG6967	0.188509	0.53366	0.466834	0.403803	0.118933	4.00828e-55	3.50905e-50
FBgn0000581	E(Pc)	0.188487	1.10612	0.687735	0.27407	0.093985	1.20305e-43	1.05321e-38
FBgn0026570	CG5704	0.188416	0.323639	0.331665	0.568093	0.136758	2.04701e-63	1.79205e-58
FBgn0002044	swm	0.188274	1.60928	0.840426	0.224022	0.0601148	2.76047e-28	2.41666e-23
FBgn0086253	rumi	0.188256	0.924612	0.671464	0.280366	0.103634	4.55761e-48	3.98996e-43
FBgn0036406	CG13484	0.188243	1.08098	0.729662	0.257986	0.110885	2.09638e-51	1.83527e-46
FBgn0263289	scrib	0.188239	0.812623	0.601377	0.313013	0.106378	2.49506e-49	2.1843e-44
FBgn0015805	HDAC1	0.188213	2.13647	0.897372	0.209738	0.0795297	4.62892e-37	4.05239e-32
FBgn0030061	CG1785	0.188157	1.26692	0.780976	0.240925	0.0652519	1.33741e-30	1.17084e-25
FBgn0263745	CR43670	0.188152	0.692947	0.571339	0.329318	0.115153	2.2465e-53	1.9667e-48
FBgn0087013	Karybeta3	0.18804	0.715095	0.568836	0.33057	0.106574	2.02814e-49	1.77553e-44
FBgn0035850	Atg18a	0.188032	1.32447	0.788486	0.238472	0.0783292	1.62296e-36	1.42082e-31
FBgn0264922	smt3	0.188014	54.0448	1	0.188014	0.00899476	2.26061e-05	1
FBgn0038020	GstD9	0.187952	0.635647	0.541927	0.346821	0.098938	6.50468e-46	5.69452e-41
FBgn0034528	CG11180	0.187941	1.45251	0.774093	0.242789	0.0404241	1.8709e-19	1.63788e-14
FBgn0010501	Dcp-1	0.187804	1.20075	0.7403	0.253687	0.0760685	1.71996e-35	1.50574e-30
FBgn0037182	ArfGAP3	0.18778	1.30398	0.772215	0.243171	0.072977	4.32254e-34	3.78416e-29
FBgn0039172	Spase22-23	0.187532	2.58751	0.93179	0.20126	0.0391317	7.07651e-19	6.19513e-14
FBgn0033244	CG8726	0.187523	0.645503	0.527534	0.355471	0.120431	8.1157e-56	7.10489e-51
FBgn0034534	maf-S	0.18747	3.66652	0.968085	0.19365	0.0411419	8.93504e-20	7.82218e-15
FBgn0002069	AspRS	0.187384	1.25407	0.755945	0.247881	0.0734861	2.54271e-34	2.22602e-29
FBgn0266420	Ote	0.187351	1.16417	0.710263	0.263778	0.103965	3.20835e-48	2.80875e-43
FBgn0000617	e(y)1	0.187201	1.57402	0.814143	0.229936	0.063734	6.46734e-30	5.66184e-25
FBgn0035766	eco	0.187105	0.845845	0.636421	0.293996	0.0955564	2.29953e-44	2.01312e-39
FBgn0028468	rtet	0.187104	0.409392	0.39612	0.472342	0.129863	3.36937e-60	2.94972e-55
FBgn0034629	Acox57D-d	0.18709	0.352936	0.353567	0.529151	0.142781	3.09983e-66	2.71375e-61
FBgn0037342	CG2931	0.187022	0.94283	0.66771	0.280095	0.0815686	5.48752e-38	4.80405e-33
FBgn0037710	CG9393	0.187014	0.813783	0.616395	0.303399	0.101973	2.63654e-47	2.30816e-42
FBgn0025626	CG4281	0.186919	0.734726	0.580726	0.321872	0.106379	2.49217e-49	2.18177e-44
FBgn0031117	GstT3	0.186868	0.461662	0.425532	0.439141	0.139779	7.90246e-65	6.91821e-60
FBgn0004855	RpII15	0.186829	1.68304	0.846058	0.220823	0.0743281	1.05697e-34	9.2532e-30
FBgn0004103	Pp1-87B	0.186734	4.64476	0.984355	0.189702	0.0191982	5.68111e-10	4.97353e-05
FBgn0029148	NHP2	0.186726	5.67551	0.991239	0.188376	0.0339263	1.49733e-16	1.31083e-11
FBgn0043903	dome	0.186714	1.1582	0.7403	0.252214	0.0738944	1.66137e-34	1.45445e-29
FBgn0041188	Atx2	0.186554	1.56546	0.830413	0.224652	0.0640445	4.68519e-30	4.10165e-25
FBgn0259984	kuz	0.186482	2.98026	0.946183	0.197088	0.051399	2.27711e-24	1.99349e-19
FBgn0265598	Bx	0.18648	0.956171	0.647685	0.287918	0.0981357	1.51647e-45	1.32759e-40
FBgn0027590	GstE12	0.1863	0.879267	0.651439	0.285982	0.109548	8.66222e-51	7.58334e-46
FBgn0001942	eIF4A	0.186255	28.4754	1	0.186255	0.000826689	0.199398	1
FBgn0031951	r2d2	0.18622	1.02088	0.687109	0.27102	0.105508	6.27037e-49	5.4894e-44
FBgn0053116	CG33116	0.186199	1.58469	0.826658	0.225243	0.102769	1.13753e-47	9.95855e-43
FBgn0033507	CG12909	0.186187	1.49109	0.819775	0.227119	0.0574531	4.34906e-27	3.80739e-22
FBgn0035337	CG15877	0.186049	1.12618	0.715269	0.260111	0.0672108	1.74687e-31	1.5293e-26
FBgn0030834	CG8675	0.185986	1.46849	0.817897	0.227395	0.0549428	5.84152e-26	5.11396e-21
FBgn0029161	slmo	0.185962	0.856088	0.622028	0.298962	0.128764	1.09532e-59	9.58901e-55
FBgn0034988	cN-IIIB	0.185684	0.58083	0.508135	0.365423	0.0822185	2.77989e-38	2.43366e-33
FBgn0010520	Bka	0.185398	1.41918	0.787234	0.235505	0.051523	2.00316e-24	1.75367e-19
FBgn0283477	SF2	0.185342	4.96553	0.982478	0.188648	0.0454752	1.02838e-21	9.00293e-17
FBgn0039019	HP1c	0.185208	1.42102	0.824781	0.224554	0.0768737	7.42119e-36	6.49688e-31
FBgn0283521	lola	0.185123	6.83222	0.993742	0.186289	0.103774	3.92878e-48	3.43945e-43
FBgn0030245	CG1637	0.185096	1.27332	0.777847	0.23796	0.0876674	9.20351e-41	8.05721e-36
FBgn0024887	kin17	0.184985	0.879445	0.647059	0.285885	0.0846015	2.29195e-39	2.00649e-34
FBgn0020370	TppII	0.184927	1.03945	0.692115	0.267192	0.0629965	1.39032e-29	1.21715e-24
FBgn0052190	NUCB1	0.184915	2.55558	0.901752	0.205062	0.039542	4.63918e-19	4.06137e-14
FBgn0263598	Vha68-2	0.184891	0.698653	0.451189	0.409787	0.0933671	2.3053e-43	2.01818e-38
FBgn0284246	l(2)k09848	0.18489	1.11113	0.712766	0.259398	0.0647092	2.34969e-30	2.05704e-25
FBgn0030749	AnxB11	0.184829	0.793931	0.617647	0.299246	0.104222	2.44448e-48	2.14002e-43
FBgn0027493	AdSS	0.184811	1.61733	0.795369	0.232359	0.0803294	2.00602e-37	1.75617e-32
FBgn0038984	AdipoR	0.184787	1.53458	0.829787	0.222692	0.0532143	3.4893e-25	3.05471e-20
FBgn0030522	CG11103	0.184561	0.696513	0.570088	0.323742	0.112124	5.62219e-52	4.92194e-47
FBgn0030318	rho-4	0.184561	1.28415	0.777222	0.237463	0.0792055	6.49572e-37	5.68667e-32
FBgn0039233	CG7006	0.184362	1.81371	0.842929	0.218716	0.039598	4.37895e-19	3.83355e-14
FBgn0052207	hpRNA:CR32207	0.184356	1.09305	0.714018	0.258195	0.0740777	1.37223e-34	1.20131e-29
FBgn0030545	CG11590	0.184308	0.890905	0.649562	0.283742	0.0736239	2.20257e-34	1.92824e-29
FBgn0263832	Rcd5	0.184278	1.32985	0.772215	0.238635	0.0723465	8.33899e-34	7.30037e-29
FBgn0051852	Tap42	0.18414	0.770031	0.593867	0.310069	0.0951249	3.62268e-44	3.17147e-39
FBgn0004926	eIF2beta	0.184062	6.03076	0.984355	0.186987	0.00415434	0.0040024	1
FBgn0038678	mRpL55	0.184046	2.10658	0.892991	0.2061	0.0369326	6.80046e-18	5.95346e-13
FBgn0010379	Akt1	0.183972	0.812622	0.600751	0.306236	0.0995848	3.2866e-46	2.87725e-41
FBgn0026582	Hmg-2	0.183945	0.851227	0.625156	0.294238	0.10617	3.11002e-49	2.72267e-44
FBgn0037669	Ibf2	0.183927	1.77428	0.869212	0.211602	0.0812379	7.75678e-38	6.79068e-33
FBgn0002174	CG5504	0.183876	0.854123	0.645181	0.284999	0.0733085	3.0599e-34	2.67879e-29
FBgn0024330	MED6	0.183825	1.35105	0.78786	0.233322	0.0638482	5.7444e-30	5.02894e-25
FBgn0011824	CG4038	0.183736	4.09443	0.98373	0.186775	0.0191417	6.02189e-10	5.27186e-05
FBgn0035335	mRpL23	0.183666	2.01278	0.898623	0.204386	0.0369037	7.00566e-18	6.13311e-13
FBgn0035397	CG11486	0.183665	3.44774	0.953692	0.192583	0.0374164	4.13391e-18	3.61903e-13
FBgn0014018	Rel	0.183653	0.736146	0.561327	0.327176	0.100253	1.62291e-46	1.42078e-41
FBgn0000100	RpLP0	0.183578	13.7035	0.996871	0.184154	0.00106156	0.145884	1
FBgn0031436	ND-B17.2	0.183558	2.21377	0.909262	0.201876	0.036883	7.15617e-18	6.26487e-13
FBgn0000273	Pka-C1	0.183557	1.69083	0.856696	0.214262	0.0585799	1.35396e-27	1.18532e-22
FBgn0036689	CG7730	0.183427	0.539549	0.38423	0.477388	0.143085	2.2321e-66	1.95409e-61
FBgn0031868	Rat1	0.183418	1.12373	0.741552	0.247344	0.0676268	1.13359e-31	9.92398e-27
FBgn0030790	CG4768	0.183275	1.21506	0.744681	0.246113	0.0667742	2.75009e-31	2.40756e-26
FBgn0032020	strat	0.183251	1.31613	0.758448	0.241613	0.0748591	6.07473e-35	5.31812e-30
FBgn0024846	p38b	0.183058	0.630526	0.535044	0.342136	0.130622	1.49421e-60	1.30811e-55
FBgn0038369	Arpc3A	0.183009	1.96908	0.861702	0.212381	0.07719	5.33432e-36	4.66993e-31
FBgn0036489	CG7011	0.18293	1.02837	0.701502	0.260768	0.0677553	9.91829e-32	8.68297e-27
FBgn0037881	GCC88	0.18287	1.03617	0.692741	0.26398	0.0764424	1.16416e-35	1.01917e-30
FBgn0040985	CG6115	0.182865	1.49364	0.826033	0.221378	0.0580249	2.4059e-27	2.10624e-22
FBgn0011710	2020-09-01	0.182847	1.49918	0.766583	0.238522	0.0760202	1.80885e-35	1.58355e-30
FBgn0051126	CG31126	0.182816	1.29108	0.772841	0.236551	0.0543484	1.08019e-25	9.45657e-21
FBgn0086361	alph	0.182764	1.83992	0.87234	0.20951	0.0489366	2.89419e-23	2.53372e-18
FBgn0058263	MFS17	0.182702	0.654738	0.514393	0.355179	0.100655	1.06142e-46	9.29217e-42
FBgn0039743	CG7946	0.182601	1.79264	0.857322	0.21299	0.0572428	5.40686e-27	4.73344e-22
FBgn0025640	CG13369	0.182582	1.06532	0.719024	0.253931	0.0569808	7.09108e-27	6.20788e-22
FBgn0026873	MED18	0.182519	1.46149	0.795369	0.229477	0.0606683	1.55529e-28	1.36158e-23
FBgn0011640	lark	0.182482	4.1986	0.979975	0.186211	0.0723307	8.4774e-34	7.42154e-29
FBgn0038627	CG7694	0.182464	0.488816	0.455569	0.400518	0.107863	5.17457e-50	4.53008e-45
FBgn0038924	CG6028	0.182406	1.24897	0.76408	0.238726	0.047835	9.02084e-23	7.89729e-18
FBgn0026196	nop5	0.182388	4.37807	0.982478	0.185641	0.0133313	2.44682e-07	0.0214207
FBgn0035999	CG3552	0.182377	0.801047	0.637672	0.286004	0.091142	2.39371e-42	2.09557e-37
FBgn0004687	Mlc-c	0.182226	1.60029	0.818523	0.222628	0.0641603	4.15441e-30	3.63698e-25
FBgn0035016	CG4612	0.182208	1.29421	0.74781	0.243655	0.0691595	2.30212e-32	2.01539e-27
FBgn0283478	und	0.182173	1.35279	0.789737	0.230676	0.0505382	5.53946e-24	4.84952e-19
FBgn0035323	CG13807	0.182117	1.42891	0.807259	0.2256	0.0404418	1.83713e-19	1.60832e-14
FBgn0003169	put	0.182083	1.2496	0.765332	0.237914	0.0653232	1.24187e-30	1.08719e-25
FBgn0035247	metl	0.182002	0.992974	0.697747	0.260842	0.0637233	6.53911e-30	5.72466e-25
FBgn0283658	muc	0.181881	0.753438	0.553191	0.328786	0.120473	7.75406e-56	6.78829e-51
FBgn0030321	CG1703	0.181871	1.67956	0.821652	0.221348	0.0410606	9.71543e-20	8.50537e-15
FBgn0038876	Idi	0.181823	1.07398	0.72403	0.251126	0.0631898	1.13768e-29	9.95986e-25
FBgn0003254	rib	0.181702	1.7083	0.739049	0.245859	0.121586	2.36606e-56	2.07136e-51
FBgn0037446	Zif	0.181569	1.44869	0.811014	0.223879	0.0541272	1.35781e-25	1.18869e-20
FBgn0044020	Roc2	0.181547	1.50172	0.824155	0.220282	0.0503524	6.71121e-24	5.87533e-19
FBgn0002781	mod(mdg4)	0.181527	1.52607	0.828536	0.219094	0.0986341	8.96356e-46	7.84715e-41
FBgn0033019	CG10395	0.181497	1.10916	0.703379	0.258036	0.0894746	1.38031e-41	1.2084e-36
FBgn0051957	CG31957	0.181489	0.997108	0.685857	0.264616	0.0717527	1.54792e-33	1.35512e-28
FBgn0264959	Src42A	0.181484	0.905044	0.649562	0.279395	0.0927871	4.24374e-43	3.71518e-38
FBgn0004556	Dbp73D	0.181472	0.777253	0.602628	0.301133	0.0800403	2.71409e-37	2.37605e-32
FBgn0003210	rb	0.181334	1.01261	0.645807	0.280787	0.0746444	7.59945e-35	6.65294e-30
FBgn0037716	Son	0.181331	0.988421	0.679599	0.266821	0.0900401	7.62049e-42	6.67136e-37
FBgn0024983	CG4293	0.181287	1.02003	0.713392	0.25412	0.092457	6.00608e-43	5.25802e-38
FBgn0013726	pnut	0.181187	1.51585	0.839174	0.215911	0.0879041	7.1792e-41	6.28503e-36
FBgn0261553	CG42671	0.18114	0.432319	0.409887	0.441925	0.124685	8.62317e-58	7.54915e-53
FBgn0015247	Diap2	0.181118	0.884628	0.640801	0.282643	0.0775417	3.69474e-36	3.23456e-31
FBgn0003517	sta	0.181108	30.2897	0.999374	0.181222	0.0329381	4.13572e-16	3.62062e-11
FBgn0020270	mre11	0.181032	0.968758	0.685857	0.263949	0.0621775	3.25188e-29	2.84686e-24
FBgn0030973	CG7332	0.180888	0.751634	0.579474	0.312158	0.112997	2.22424e-52	1.94721e-47
FBgn0050291	CG30291	0.18082	0.863098	0.640801	0.282179	0.0829717	1.26359e-38	1.10621e-33
FBgn0035830	CG8209	0.180792	1.51787	0.835419	0.216409	0.0456926	8.21888e-22	7.19522e-17
FBgn0000416	Sap-r	0.180697	1.47529	0.821026	0.220087	0.0543105	1.12338e-25	9.83461e-21
FBgn0035872	Cpsf6	0.180648	2.45529	0.923029	0.195712	0.113972	7.8875e-53	6.90512e-48
FBgn0027950	MBD-like	0.180607	1.77738	0.877347	0.205856	0.0946533	5.95318e-44	5.21171e-39
FBgn0034430	mip40	0.180556	1.37531	0.782854	0.230638	0.0842076	3.46307e-39	3.03175e-34
FBgn0033377	Pgm2a	0.18043	1.11351	0.730288	0.247066	0.114197	6.20705e-53	5.43396e-48
FBgn0036058	CG6707	0.1804	0.915583	0.660826	0.272992	0.108358	3.06159e-50	2.68027e-45
FBgn0036277	CG10418	0.180374	2.15754	0.913642	0.197423	0.0425146	2.17335e-20	1.90266e-15
FBgn0036887	CG9231	0.180373	0.981431	0.53567	0.336725	0.0754346	3.33279e-35	2.91769e-30
FBgn0086683	Spf45	0.180271	1.67963	0.837922	0.21514	0.0600275	3.02182e-28	2.64546e-23
FBgn0034617	Panx	0.180189	0.703782	0.566333	0.318168	0.100953	7.74816e-47	6.78313e-42
FBgn0014868	Ost48	0.180143	3.04982	0.953066	0.189014	0.0324203	7.04291e-16	6.16571e-11
FBgn0035876	Pex2	0.179968	0.696384	0.574468	0.313278	0.104069	2.87414e-48	2.51616e-43
FBgn0086384	Mer	0.179896	0.826168	0.629537	0.28576	0.0835195	7.11955e-39	6.23281e-34
FBgn0052708	CG32708	0.179895	1.10711	0.723404	0.248679	0.0602105	2.49961e-28	2.18828e-23
FBgn0052163	CG32163	0.179851	0.705109	0.560075	0.321119	0.0829172	1.3378e-38	1.17117e-33
FBgn0034925	CG5339	0.179837	0.943486	0.650814	0.276326	0.0988211	7.35851e-46	6.44201e-41
FBgn0035515	CG14997	0.179835	0.446272	0.417397	0.430849	0.109561	8.54244e-51	7.47848e-46
FBgn0030502	tth	0.179828	1.35596	0.760325	0.236514	0.104615	1.61284e-48	1.41196e-43
FBgn0028969	deltaCOP	0.179677	1.28491	0.782854	0.229516	0.0602804	2.32491e-28	2.03534e-23
FBgn0085370	Pde11	0.179639	0.422029	0.373592	0.480844	0.140281	4.60177e-65	4.02862e-60
FBgn0020510	Abi	0.179638	0.987605	0.694618	0.258614	0.0838098	5.2532e-39	4.59891e-34
FBgn0032408	CG6712	0.179609	1.58878	0.838548	0.21419	0.0452592	1.28496e-21	1.12492e-16
FBgn0015229	glec	0.179602	2.90875	0.840426	0.213703	0.0778218	2.75757e-36	2.41411e-31
FBgn0026207	mbo	0.17959	1.37743	0.770964	0.232943	0.0450743	1.55475e-21	1.36111e-16
FBgn0003275	RpII18	0.179411	6.04182	0.99562	0.1802	0.0153043	3.16701e-08	0.00277256
FBgn0036516	CG7656	0.179229	1.64465	0.831665	0.215506	0.0660135	6.06231e-31	5.30725e-26
FBgn0031309	Tfb4	0.17916	0.776683	0.600125	0.298537	0.0803851	1.89249e-37	1.65678e-32
FBgn0034361	mRpS28	0.179119	1.72446	0.859825	0.20832	0.0403734	1.97129e-19	1.72576e-14
FBgn0261822	Bsg	0.179078	2.62068	0.933041	0.191929	0.0274283	1.19233e-13	1.04382e-08
FBgn0036770	Prestin	0.178896	0.357573	0.342929	0.52167	0.12758	3.89166e-59	3.40695e-54
FBgn0033378	tsu	0.178828	4.60051	0.974343	0.183537	0.0221433	2.73553e-11	2.39482e-06
FBgn0028484	Ack	0.178822	0.605809	0.51627	0.346372	0.0955047	2.42817e-44	2.12574e-39
FBgn0043458	CG12084	0.178756	0.651486	0.536295	0.333316	0.106335	2.61284e-49	2.28741e-44
FBgn0053170	CG33170	0.178738	1.52702	0.833542	0.214432	0.0805816	1.54106e-37	1.34912e-32
FBgn0033638	CG9005	0.178644	1.17013	0.722153	0.247377	0.0522441	9.51042e-25	8.3259e-20
FBgn0027786	Mtch	0.178524	1.28204	0.768461	0.232314	0.0585094	1.45659e-27	1.27517e-22
FBgn0014184	Oda	0.178486	7.99431	0.996871	0.179046	0.00153405	0.0804191	1
FBgn0025366	Ip259	0.178463	5.35041	0.993742	0.179587	0.00356129	0.00771171	1
FBgn0030456	CG4332	0.178444	0.733703	0.5801	0.307609	0.0926536	4.88392e-43	4.27563e-38
FBgn0034258	eIF3c	0.178332	2.27074	0.911765	0.19559	0.0299929	8.54065e-15	7.47691e-10
FBgn0011291	Taf11	0.178331	1.45649	0.819149	0.217702	0.0505963	5.21713e-24	4.56733e-19
FBgn0036844	Mkp3	0.178276	1.33414	0.727159	0.245167	0.0488861	3.04933e-23	2.66954e-18
FBgn0037018	CG4042	0.178239	0.708104	0.583855	0.30528	0.0812239	7.87114e-38	6.89079e-33
FBgn0036180	Duba	0.178187	0.978938	0.666458	0.267365	0.0609154	1.20378e-28	1.05385e-23
FBgn0032889	CG9331	0.178166	0.676294	0.56383	0.315993	0.103003	8.87815e-48	7.77237e-43
FBgn0037892	mRpL40	0.178062	1.24877	0.757196	0.235159	0.0523051	8.92904e-25	7.81693e-20
FBgn0022942	Cbp80	0.177957	0.836982	0.629537	0.282679	0.0966052	7.61553e-45	6.66702e-40
FBgn0010317	CycJ	0.177889	0.613057	0.523154	0.340032	0.0813637	6.79959e-38	5.9527e-33
FBgn0032262	CG7384	0.177629	0.342082	0.256571	0.692319	0.119645	1.87594e-55	1.64229e-50
FBgn0029503	CHORD	0.177546	0.924147	0.645181	0.275188	0.0582679	1.87052e-27	1.63755e-22
FBgn0036314	Sf3a2	0.177449	1.3761	0.785982	0.225767	0.0547988	6.77987e-26	5.93544e-21
FBgn0022936	CycH	0.17744	1.18488	0.742178	0.23908	0.0666742	3.05133e-31	2.67128e-26
FBgn0262619	DNAlig1	0.177404	0.76287	0.596996	0.297161	0.0843022	3.13601e-39	2.74542e-34
FBgn0030529	Clic	0.177378	1.44379	0.812265	0.218374	0.0583638	1.69365e-27	1.48271e-22
FBgn0035528	CG15012	0.177359	2.45906	0.921777	0.19241	0.02529	1.07448e-12	9.40657e-08
FBgn0000454	Dip-B	0.177248	0.398832	0.374844	0.472858	0.106781	1.62812e-49	1.42534e-44
FBgn0270924	zf30C	0.177167	1.16749	0.750939	0.235927	0.0699455	1.01603e-32	8.89481e-28
FBgn0036671	CG9951	0.177024	0.893904	0.652065	0.271482	0.0690125	2.68266e-32	2.34854e-27
FBgn0031768	CG12393	0.177001	1.0081	0.704005	0.251421	0.0556463	2.82161e-26	2.47017e-21
FBgn0029711	Usf	0.176956	0.763684	0.59637	0.296721	0.10504	1.02936e-48	9.01152e-44
FBgn0022359	Sodh-2	0.176936	0.684195	0.558198	0.316977	0.0816294	5.1494e-38	4.50804e-33
FBgn0035715	CG10103	0.176852	0.956563	0.676471	0.261434	0.0697514	1.24351e-32	1.08863e-27
FBgn0039212	Syx18	0.176734	0.828708	0.628911	0.281016	0.0910218	2.71613e-42	2.37784e-37
FBgn0039270	PQBP1	0.176687	0.892899	0.65582	0.269414	0.0978793	1.98727e-45	1.73975e-40
FBgn0031782	WDR79	0.176685	0.961635	0.688986	0.256442	0.0643635	3.36422e-30	2.94521e-25
FBgn0015829	TfIIEbeta	0.176682	1.26551	0.749687	0.235674	0.0542548	1.19008e-25	1.04186e-20
FBgn0027620	Acf	0.176624	0.912764	0.647059	0.272964	0.0897379	1.04684e-41	9.16455e-37
FBgn0029664	CG10802	0.176611	0.628126	0.539424	0.327407	0.0881706	5.4277e-41	4.75168e-36
FBgn0266000	CG44774	0.176529	2.57759	0.938673	0.188062	0.0692378	2.12202e-32	1.85772e-27
FBgn0039765	mRpS18C	0.17652	1.51236	0.819149	0.215492	0.0379907	2.28962e-18	2.00445e-13
FBgn0034365	CG5335	0.17652	0.442662	0.416145	0.424178	0.0957521	1.87119e-44	1.63813e-39
FBgn0030465	CG15743	0.176259	0.838954	0.640175	0.275329	0.0922927	7.13892e-43	6.24977e-38
FBgn0032925	CG9246	0.176251	0.970785	0.678348	0.259824	0.0572543	5.34307e-27	4.67759e-22
FBgn0001149	GstD1	0.176051	0.768577	0.438673	0.401327	0.165249	7.7787e-77	6.80986e-72
FBgn0021814	Vps28	0.176043	1.64668	0.852941	0.206395	0.0435128	7.77191e-21	6.80392e-16
FBgn0026431	Grip75	0.176014	0.79996	0.606383	0.290268	0.0880825	5.95337e-41	5.21187e-36
FBgn0039528	dsd	0.175856	1.16327	0.723404	0.243095	0.081438	6.29143e-38	5.50783e-33
FBgn0023515	CG14814	0.175788	0.614975	0.473717	0.371082	0.125255	4.68603e-58	4.10238e-53
FBgn0038585	Non3	0.175689	1.42814	0.804756	0.218313	0.0493443	1.90021e-23	1.66354e-18
FBgn0030007	alpha-PheRS	0.175611	1.03392	0.68398	0.256749	0.0567347	9.14845e-27	8.00901e-22
FBgn0067629	CG33332	0.175578	0.746798	0.589487	0.297849	0.086337	3.7163e-40	3.25343e-35
FBgn0014029	Septin2	0.175562	1.86486	0.871089	0.201543	0.0499007	1.06987e-23	9.36621e-19
FBgn0013981	His4r	0.1755	20.9852	1	0.1755	0.00718135	0.000153467	1
FBgn0010583	dock	0.175495	0.950864	0.672716	0.260876	0.10966	7.69426e-51	6.73594e-46
FBgn0039305	CG11858	0.175485	1.17892	0.754693	0.232525	0.0447398	2.19483e-21	1.92147e-16
FBgn0015513	mbc	0.175478	0.610681	0.523154	0.335422	0.100955	7.7311e-47	6.76819e-42
FBgn0027601	pdgy	0.175415	0.593335	0.479975	0.365466	0.102315	1.8373e-47	1.60846e-42
FBgn0027088	GlyRS	0.175389	1.18789	0.751564	0.233365	0.0466383	3.09961e-22	2.71355e-17
FBgn0028292	ric8a	0.17538	0.769121	0.600125	0.292239	0.0882995	4.7409e-41	4.15042e-36
FBgn0043456	Ndf	0.175368	1.68583	0.85607	0.204852	0.0874706	1.13145e-40	9.90529e-36
FBgn0035063	CG3594	0.175139	1.2988	0.779099	0.224797	0.0434499	8.29254e-21	7.2597e-16
FBgn0032052	PIG-U	0.175125	0.982827	0.685232	0.255571	0.073552	2.37399e-34	2.07831e-29
FBgn0265935	coro	0.175019	0.934623	0.640175	0.273392	0.104452	1.91838e-48	1.67944e-43
FBgn0004101	bs	0.17484	0.58805	0.515645	0.33907	0.0839712	4.43607e-39	3.88356e-34
FBgn0026090	CG14812	0.174768	1.62054	0.842929	0.207335	0.0389002	8.98039e-19	7.86188e-14
FBgn0028425	JhI-21	0.174767	0.933412	0.649562	0.269053	0.0987605	7.84442e-46	6.8674e-41
FBgn0036173	CG7394	0.174618	1.3458	0.782854	0.223053	0.0308272	3.62262e-15	3.17142e-10
FBgn0030090	fend	0.174251	1.53085	0.81602	0.213538	0.0885174	3.77132e-41	3.3016e-36
FBgn0036005	pall	0.174167	1.25278	0.752816	0.231354	0.072533	6.86584e-34	6.0107e-29
FBgn0053276	Urm1	0.174165	0.693381	0.576971	0.30186	0.0738243	1.78734e-34	1.56473e-29
FBgn0024973	CG2701	0.174142	0.726386	0.585732	0.297307	0.079995	2.84569e-37	2.49126e-32
FBgn0011745	Arp1	0.174067	1.34265	0.794118	0.219196	0.0608306	1.31446e-28	1.15074e-23
FBgn0262579	Ect4	0.173998	0.425414	0.396746	0.438562	0.116335	6.38087e-54	5.58614e-49
FBgn0038742	Arc42	0.173956	0.72129	0.586358	0.296671	0.0682207	6.11303e-32	5.35165e-27
FBgn0051098	CG31098	0.173923	0.385817	0.377347	0.46091	0.102301	1.8657e-47	1.63332e-42
FBgn0030883	CG7772	0.173759	0.641308	0.537547	0.323245	0.107194	1.0514e-49	9.20446e-45
FBgn0030013	GIIIspla2	0.173749	0.55668	0.456195	0.380866	0.0987249	8.14427e-46	7.1299e-41
FBgn0262560	wcd	0.17372	0.759339	0.596996	0.29099	0.0612346	8.64591e-29	7.56907e-24
FBgn0028980	tant	0.173682	1.26916	0.77597	0.223826	0.0825781	1.90797e-38	1.67033e-33
FBgn0040394	CG16903	0.173677	1.15632	0.738423	0.235201	0.0807619	1.27615e-37	1.11721e-32
FBgn0038768	CG4936	0.173469	1.16885	0.751564	0.23081	0.106655	1.86168e-49	1.62981e-44
FBgn0052202	CG32202	0.173226	1.62814	0.834793	0.207508	0.046539	3.4338e-22	3.00612e-17
FBgn0051864	Qtzl	0.173223	0.709611	0.579474	0.298931	0.0999301	2.28277e-46	1.99845e-41
FBgn0036919	Grasp65	0.173095	0.847585	0.651439	0.265712	0.0795386	4.5861e-37	4.0149e-32
FBgn0035721	CG9948	0.173035	0.967033	0.677722	0.255318	0.0601542	2.64986e-28	2.31982e-23
FBgn0000308	chic	0.172855	15.413	1	0.172855	0.0153006	3.17926e-08	0.00278328
FBgn0032358	Ppt2	0.172632	0.921575	0.678974	0.254255	0.115401	1.72578e-53	1.51083e-48
FBgn0029093	cathD	0.172549	1.58858	0.779099	0.221473	0.0432988	9.68905e-21	8.48228e-16
FBgn0039665	CG2310	0.172488	1.01518	0.683354	0.252414	0.0632795	1.0365e-29	9.07402e-25
FBgn0004921	Ggamma1	0.172306	3.87913	0.978723	0.176052	0.0141605	1.03531e-07	0.00906363
FBgn0037656	CG11986	0.172286	0.751515	0.60826	0.283245	0.08335	8.50307e-39	7.44401e-34
FBgn0015929	dpa	0.172203	0.852624	0.63204	0.272455	0.0724435	7.53689e-34	6.59817e-29
FBgn0034496	CG9143	0.172169	0.766233	0.597622	0.28809	0.0736914	2.05288e-34	1.79719e-29
FBgn0038893	Archease	0.172101	0.844421	0.626408	0.274743	0.0565498	1.10785e-26	9.6987e-22
FBgn0039790	CG2246	0.172081	1.14553	0.703379	0.24465	0.043682	6.52873e-21	5.71558e-16
FBgn0000395	cv-2	0.172026	0.541095	0.416145	0.413379	0.106904	1.42892e-49	1.25094e-44
FBgn0037081	barc	0.171933	0.881976	0.64831	0.265201	0.0719092	1.31509e-33	1.1513e-28
FBgn0259139	glo	0.17192	2.44048	0.931164	0.18463	0.0447913	2.08126e-21	1.82204e-16
FBgn0031488	CG17265	0.171736	1.23054	0.68398	0.251084	0.06865	3.91127e-32	3.42412e-27
FBgn0038235	CG8461	0.17172	0.845375	0.632666	0.271422	0.0609486	1.16303e-28	1.01818e-23
FBgn0038470	CG18213	0.171663	0.848555	0.631414	0.271871	0.0665384	3.51376e-31	3.07612e-26
FBgn0039909	ND-49	0.171614	1.36631	0.783479	0.219041	0.0344198	9.01454e-17	7.89178e-12
FBgn0036193	CG14135	0.171451	0.75983	0.600751	0.285394	0.0708779	3.84924e-33	3.36982e-28
FBgn0011666	msi	0.171426	3.16861	0.952441	0.179986	0.14613	8.30263e-68	7.26854e-63
FBgn0014411	Vps26	0.171414	0.74925	0.594493	0.288337	0.139172	1.52035e-64	1.33099e-59
FBgn0052672	Atg8a	0.171324	4.74887	0.987484	0.173495	0.0112813	2.06429e-06	0.180719
FBgn0010750	atms	0.171228	0.995696	0.697747	0.245401	0.0512803	2.57411e-24	2.2535e-19
FBgn0042112	mRpL36	0.17119	1.96953	0.870463	0.196665	0.0265496	2.94273e-13	2.57622e-08
FBgn0031144	CG1529	0.171115	0.540115	0.474969	0.360265	0.110997	1.86164e-51	1.62977e-46
FBgn0011660	Pms2	0.171056	0.564585	0.498748	0.34297	0.107706	6.10867e-50	5.34783e-45
FBgn0013799	Deaf1	0.170936	1.29235	0.767835	0.22262	0.0746759	7.35407e-35	6.43812e-30
FBgn0035630	CG10576	0.170912	1.8658	0.861702	0.198342	0.0242149	3.24634e-12	2.84201e-07
FBgn0035692	Sf3b6	0.170835	5.27381	0.989362	0.172672	0.00535183	0.00108677	1
FBgn0032907	CG9272	0.170828	0.707516	0.553817	0.308456	0.0857411	6.94136e-40	6.07682e-35
FBgn0040080	pins	0.170822	0.885734	0.648936	0.263234	0.116109	8.11989e-54	7.10856e-49
FBgn0029522	CG13373	0.170789	0.592793	0.497497	0.343296	0.103668	4.39652e-48	3.84894e-43
FBgn0030657	cerv	0.170672	0.974321	0.68836	0.24794	0.0871607	1.56618e-40	1.37111e-35
FBgn0053969	CG33969	0.170623	0.503014	0.444931	0.383482	0.10083	8.82539e-47	7.72619e-42
FBgn0039218	Rpb10	0.170603	2.991	0.93617	0.182235	0.0092671	1.69809e-05	1
FBgn0032034	Rcd4	0.170513	0.767263	0.594493	0.28682	0.0737725	1.88636e-34	1.65141e-29
FBgn0014366	noi	0.17043	0.914248	0.65582	0.259873	0.0802082	2.27716e-37	1.99354e-32
FBgn0038363	Acyp2	0.17042	1.21476	0.761577	0.223773	0.0375149	3.73552e-18	3.27026e-13
FBgn0001120	gnu	0.17013	1.95763	0.758448	0.224313	0.0389285	8.72278e-19	7.63635e-14
FBgn0033209	CG12107	0.170128	1.31581	0.766583	0.22193	0.0404982	1.73364e-19	1.51772e-14
FBgn0030177	CG2972	0.170107	0.76161	0.602628	0.282275	0.0599309	3.33986e-28	2.92388e-23
FBgn0039381	SppL	0.170075	1.31248	0.787234	0.216041	0.055172	4.6087e-26	4.03469e-21
FBgn0020440	Fak	0.170017	1.06628	0.719024	0.236455	0.103831	3.69812e-48	3.23752e-43
FBgn0037329	POLDIP2	0.169999	0.880443	0.64831	0.262218	0.0614744	6.74242e-29	5.90265e-24
FBgn0013334	Sap47	0.169906	1.19751	0.735294	0.231072	0.0561563	1.66467e-26	1.45733e-21
FBgn0033581	CG12391	0.169857	1.29128	0.764706	0.22212	0.0709083	3.72952e-33	3.26501e-28
FBgn0262732	mbf1	0.169771	2.52781	0.915519	0.185437	0.0231811	9.40237e-12	8.2313e-07
FBgn0000499	dsh	0.169671	1.68101	0.827284	0.205094	0.055269	4.16874e-26	3.64952e-21
FBgn0027866	CG9776	0.169604	1.46778	0.794118	0.213576	0.0470202	2.0906e-22	1.83021e-17
FBgn0030000	CG2260	0.169593	0.805549	0.613892	0.276259	0.0640117	4.84745e-30	4.2437e-25
FBgn0037551	Arl8	0.169556	1.31619	0.799124	0.212177	0.0788758	9.16804e-37	8.02616e-32
FBgn0034727	mRpS29	0.169515	1.25965	0.741552	0.228594	0.0320514	1.02915e-15	9.00968e-11
FBgn0033624	CG12384	0.169494	2.55037	0.895494	0.189275	0.0164946	9.24936e-09	0.000809735
FBgn0031263	Tspo	0.169437	0.825131	0.623905	0.271575	0.0551176	4.87573e-26	4.26845e-21
FBgn0030874	Spt7	0.169432	1.01295	0.698999	0.242393	0.05344	2.76326e-25	2.41909e-20
FBgn0033902	eIF3m	0.169425	4.25149	0.988736	0.171355	0.00192912	0.0499261	1
FBgn0285951	mRpS34	0.169364	1.08987	0.696496	0.243166	0.0418401	4.3536e-20	3.81136e-15
FBgn0027504	CG8878	0.169302	1.37596	0.794743	0.213027	0.0533849	2.92512e-25	2.5608e-20
FBgn0033400	CG2063	0.169297	1.12978	0.728411	0.232419	0.0497584	1.23917e-23	1.08483e-18
FBgn0052068	Adi1	0.169164	0.618876	0.514393	0.328862	0.0750686	4.88219e-35	4.27411e-30
FBgn0038396	CG5013	0.169014	1.01534	0.710263	0.23796	0.040861	1.19325e-19	1.04463e-14
FBgn0032059	PrBP	0.168957	1.14252	0.739675	0.22842	0.0438531	5.47326e-21	4.79157e-16
FBgn0034001	mRpL41	0.168952	1.08616	0.716521	0.235795	0.0502717	7.29445e-24	6.38592e-19
FBgn0028473	Non1	0.16895	5.26034	0.993742	0.170014	0.000939935	0.171198	1
FBgn0030966	shop	0.16894	0.441545	0.418023	0.404141	0.108698	2.13502e-50	1.86911e-45
FBgn0038745	CG4538	0.168891	0.745865	0.58761	0.287421	0.0666291	3.19775e-31	2.79947e-26
FBgn0013753	Bgb	0.168872	1.94978	0.880476	0.191796	0.0358782	2.01167e-17	1.76111e-12
FBgn0034057	CG8314	0.168815	0.861828	0.647685	0.260643	0.0935513	1.89919e-43	1.66264e-38
FBgn0027841	CstF64	0.168546	0.821234	0.631414	0.266934	0.0849824	1.53756e-39	1.34606e-34
FBgn0036402	CG6650	0.168314	0.637647	0.550688	0.305643	0.107512	7.50778e-50	6.57269e-45
FBgn0035986	CG4022	0.168293	1.09375	0.730914	0.23025	0.059278	6.56995e-28	5.75166e-23
FBgn0053002	mRpL27	0.168218	1.5625	0.832916	0.201963	0.0195378	4.00339e-10	3.50477e-05
FBgn0034527	CG9945	0.168115	0.903598	0.630163	0.266781	0.0626352	2.02274e-29	1.77081e-24
FBgn0040285	Scamp	0.168065	1.22705	0.757196	0.221957	0.0605526	1.75344e-28	1.53505e-23
FBgn0031357	mRpL48	0.168052	1.19356	0.750313	0.223976	0.045671	8.40475e-22	7.35794e-17
FBgn0012058	Cdc27	0.16802	0.938999	0.678974	0.247461	0.0620036	3.8948e-29	3.4097e-24
FBgn0027579	mino	0.168008	0.808236	0.635169	0.264509	0.0694406	1.71836e-32	1.50434e-27
FBgn0035228	CG12091	0.167973	1.6704	0.844806	0.19883	0.0241952	3.31293e-12	2.90031e-07
FBgn0003483	spn-E	0.167793	0.550873	0.485607	0.345533	0.0649278	1.87256e-30	1.63933e-25
FBgn0030514	CG9941	0.167786	0.572818	0.500626	0.335152	0.0925323	5.54858e-43	4.8575e-38
FBgn0033814	Qsox1	0.167735	0.654008	0.541927	0.309516	0.0770818	5.97246e-36	5.22859e-31
FBgn0036745	CG7484	0.167686	1.60097	0.83229	0.201475	0.0313825	2.04692e-15	1.79197e-10
FBgn0004400	rhi	0.16766	0.539313	0.48811	0.343489	0.0907534	3.60148e-42	3.15291e-37
FBgn0033349	CG8243	0.16757	0.969717	0.679599	0.246571	0.0866066	2.80076e-40	2.45192e-35
FBgn0027525	LTV1	0.167523	2.48563	0.916145	0.182856	0.0195026	4.15095e-10	3.63395e-05
FBgn0039459	IntS12	0.167234	0.648454	0.538798	0.310383	0.0836577	6.16029e-39	5.39303e-34
FBgn0003444	smo	0.1672	0.569279	0.510013	0.327835	0.100803	9.08534e-47	7.95376e-42
FBgn0033260	Cul4	0.167191	0.995876	0.68398	0.244439	0.0531638	3.67623e-25	3.21835e-20
FBgn0040259	Ugt302C1	0.167171	0.423835	0.407384	0.410352	0.0996707	3.00161e-46	2.62776e-41
FBgn0032341	Reps	0.167129	0.699784	0.56383	0.296417	0.083602	6.53025e-39	5.71691e-34
FBgn0034503	MED8	0.167003	1.13887	0.722778	0.231057	0.0476624	1.07781e-22	9.4357e-18
FBgn0038389	CG5516	0.166813	0.848442	0.610763	0.273122	0.0686398	3.95321e-32	3.46084e-27
FBgn0035772	Sh3beta	0.166755	1.86144	0.848561	0.196515	0.0388477	9.47935e-19	8.29869e-14
FBgn0001961	Arpc1	0.166619	1.39218	0.797247	0.208993	0.0421428	3.18752e-20	2.79051e-15
FBgn0036990	mRpL15	0.166508	1.16268	0.743429	0.223973	0.0485161	4.46699e-23	3.91063e-18
FBgn0039465	Tsp97E	0.166501	1.09634	0.700876	0.237561	0.0645802	2.68645e-30	2.35185e-25
FBgn0261792	snRNP-U1-C	0.166467	1.51677	0.826658	0.201374	0.0397767	3.6435e-19	3.1897e-14
FBgn0025743	mbt	0.166398	1.13464	0.730914	0.227658	0.0682235	6.09515e-32	5.336e-27
FBgn0039150	CG13605	0.166367	0.786875	0.600751	0.276932	0.0952749	3.0935e-44	2.7082e-39
FBgn0052069	CG32069	0.166343	1.58132	0.834168	0.199412	0.0312885	2.25462e-15	1.9738e-10
FBgn0030373	moon	0.166286	0.494944	0.430538	0.386228	0.100203	1.71054e-46	1.49749e-41
FBgn0036847	CNPYb	0.16625	1.00593	0.697747	0.238267	0.039909	3.17964e-19	2.78362e-14
FBgn0033988	pcs	0.166163	4.45941	0.963079	0.172533	0.0114584	1.71628e-06	0.150251
FBgn0003514	sqh	0.166156	2.79685	0.958698	0.173315	0.0113824	1.85784e-06	0.162644
FBgn0262125	Sec23	0.165945	0.864648	0.65582	0.253035	0.0820311	3.38235e-38	2.96108e-33
FBgn0040337	CG3021	0.165883	0.454857	0.431164	0.384734	0.104087	2.82113e-48	2.46975e-43
FBgn0035025	uri	0.165839	0.606118	0.510638	0.324768	0.10574	4.90408e-49	4.29327e-44
FBgn0035916	GAPsec	0.165837	0.567639	0.502503	0.330022	0.104077	2.8518e-48	2.49661e-43
FBgn0040346	CG3704	0.165799	0.84549	0.650188	0.255001	0.0662144	4.92059e-31	4.30773e-26
FBgn0033555	RpS15Ab	0.165748	1.91378	0.887359	0.186787	0.0180305	1.89416e-09	0.000165824
FBgn0032029	CG17292	0.16573	0.30504	0.299124	0.554052	0.124683	8.64222e-58	7.56583e-53
FBgn0015949	hrg	0.165657	1.6458	0.8398	0.197257	0.0382881	1.68596e-18	1.47598e-13
FBgn0025455	CycT	0.165578	1.07998	0.656446	0.252235	0.0532162	3.48234e-25	3.04862e-20
FBgn0025373	Fpps	0.165556	1.39707	0.79224	0.208972	0.0414897	6.24532e-20	5.46746e-15
FBgn0039543	CG12428	0.165394	0.579498	0.509387	0.324692	0.109963	5.57928e-51	4.88438e-46
FBgn0010803	TrpRS	0.165335	0.75909	0.577597	0.286246	0.0930927	3.07721e-43	2.69394e-38
FBgn0032597	CG17904	0.165142	0.996163	0.689612	0.23947	0.0420351	3.56154e-20	3.11795e-15
FBgn0051716	Cnot4	0.165125	0.831512	0.618899	0.266805	0.068685	3.77146e-32	3.30172e-27
FBgn0259834	out	0.165076	0.365578	0.359199	0.459567	0.112177	5.31733e-52	4.65506e-47
FBgn0262519	Mi-2	0.165067	1.52718	0.797247	0.207046	0.0304923	5.11127e-15	4.47466e-10
FBgn0039099	GILT2	0.165051	1.03948	0.689612	0.239339	0.0462293	4.726e-22	4.13738e-17
FBgn0262656	Myc	0.164958	1.77713	0.837297	0.197013	0.0325613	6.09267e-16	5.33383e-11
FBgn0054008	CG34008	0.164926	0.672858	0.56383	0.29251	0.0589718	9.02266e-28	7.89889e-23
FBgn0038234	mRpL11	0.164845	0.799908	0.617021	0.267162	0.0759949	1.85738e-35	1.62604e-30
FBgn0003997	hid	0.164812	1.8566	0.529412	0.311312	0.0592214	6.96668e-28	6.09898e-23
FBgn0024689	fws	0.164758	0.519263	0.466834	0.352928	0.0814946	5.92986e-38	5.1913e-33
FBgn0085453	Mthfs	0.164741	0.666282	0.565707	0.291213	0.0779034	2.53205e-36	2.21668e-31
FBgn0083124	Uhg4	0.164724	2.05881	0.839174	0.196293	0.0199059	2.73948e-10	2.39827e-05
FBgn0039125	Ndc1	0.164683	0.960167	0.686483	0.239894	0.0566471	1.00173e-26	8.76963e-22
FBgn0032053	mRpL51	0.164678	1.08843	0.729662	0.225691	0.0444877	2.84608e-21	2.4916e-16
FBgn0027945	ppl	0.164625	1.08352	0.71965	0.228757	0.0448857	1.88832e-21	1.65313e-16
FBgn0002590	RpS5a	0.164596	14.9364	0.998748	0.164803	0.00989294	8.80882e-06	0.771168
FBgn0036211	CG5946	0.164417	0.819828	0.610138	0.269476	0.0494504	1.7031e-23	1.49098e-18
FBgn0284257	Ttd14	0.164414	0.945522	0.667084	0.246467	0.054655	7.86741e-26	6.88752e-21
FBgn0034245	UQCR-6.4	0.164289	7.18329	0.991865	0.165637	0.00118517	0.124394	1
FBgn0031093	CG9581	0.164261	0.730848	0.584481	0.281038	0.0532146	3.48822e-25	3.05376e-20
FBgn0031544	CG17593	0.164185	0.892957	0.658949	0.249162	0.0573326	4.92691e-27	4.31326e-22
FBgn0022987	qkr54B	0.164181	0.432693	0.406758	0.403634	0.0986797	8.54252e-46	7.47855e-41
FBgn0031068	Alr	0.164164	0.662521	0.537547	0.305396	0.0678121	9.34873e-32	8.18434e-27
FBgn0040918	schlank	0.16403	1.62206	0.830413	0.197529	0.0495383	1.55536e-23	1.36164e-18
FBgn0026427	Su(var)2-HP2	0.16401	0.755554	0.57572	0.284878	0.0713189	2.4319e-33	2.12901e-28
FBgn0040290	RecQ4	0.163999	0.695997	0.557572	0.294131	0.0574283	4.46218e-27	3.90642e-22
FBgn0045073	Stim	0.163979	0.852818	0.628285	0.260995	0.0812256	7.85684e-38	6.87827e-33
FBgn0267585	lncRNA:CR45923	0.163932	0.271135	0.279099	0.587361	0.117802	1.33763e-54	1.17103e-49
FBgn0031601	Dim1	0.163916	1.15361	0.747184	0.219378	0.0312592	2.32359e-15	2.03419e-10
FBgn0283467	Pol32	0.163889	0.667444	0.52816	0.310302	0.0906808	3.88711e-42	3.40297e-37
FBgn0036702	CG6512	0.163745	0.828743	0.621402	0.26351	0.0431734	1.1026e-20	9.65271e-16
FBgn0039601	CG1523	0.163696	0.647699	0.549437	0.297934	0.0706719	4.77031e-33	4.17617e-28
FBgn0027057	CSN1b	0.163677	0.699344	0.569462	0.287424	0.0684481	4.82521e-32	4.22423e-27
FBgn0033341	MrgBP	0.163559	1.56814	0.828536	0.197408	0.0301896	6.97677e-15	6.10781e-10
FBgn0027334	l(1)G0004	0.163533	1.60311	0.826033	0.197975	0.0248476	1.69345e-12	1.48253e-07
FBgn0053303	CG33303	0.16352	1.93495	0.877972	0.186248	0.0295379	1.36329e-14	1.19349e-09
FBgn0029067	Dd	0.163483	1.05356	0.66771	0.244842	0.068485	4.64362e-32	4.06526e-27
FBgn0035415	CG14966	0.163437	1.52712	0.824155	0.198309	0.0234281	7.29257e-12	6.38428e-07
FBgn0038569	CG7218	0.16317	0.66909	0.558824	0.291988	0.0838021	5.2959e-39	4.63629e-34
FBgn0259152	Clbn	0.163089	0.598067	0.476846	0.342015	0.0851986	1.22589e-39	1.0732e-34
FBgn0086446	DCTN6-p27	0.163034	0.930533	0.675845	0.24123	0.0509579	3.59123e-24	3.14394e-19
FBgn0032595	CG17996	0.162913	1.05991	0.696496	0.233904	0.0339779	1.41989e-16	1.24304e-11
FBgn0260743	GC1	0.162851	0.629682	0.458073	0.355513	0.089403	1.48805e-41	1.30272e-36
FBgn0024285	Srp54	0.162819	1.98652	0.890488	0.182843	0.04337	9.00418e-21	7.88271e-16
FBgn0013720	pck	0.162788	1.08872	0.715895	0.227391	0.0611422	9.51544e-29	8.33029e-24
FBgn0039302	Nup358	0.162782	0.877532	0.646433	0.251816	0.0506447	4.96263e-24	4.34454e-19
FBgn0020412	JIL-1	0.162681	4.80375	0.991239	0.164119	0.00470224	0.00219792	1
[truncated: 2 more rows]

## Sheet: Zygotic
gene_id	gene_short_name	marker_score	mean_expression	fraction_expressing	specificity	pseudo_R2	marker_test_p_value	marker_test_q_value
FBgn0031365	CG17650	0.499465	4.37609	0.948003	0.52686	0.573254	9.00757e-296	7.88568e-291
FBgn0052971	CG32971	0.48614	2.91503	0.923272	0.526541	0.553467	1.07078e-283	9.37412e-279
FBgn0031337	CG14346	0.476707	3.2175	0.939759	0.507265	0.557394	4.43726e-286	3.8846e-281
FBgn0262534	CG43088	0.46686	1.59691	0.805327	0.579716	0.461815	6.00731e-230	5.2591e-225
FBgn0034411	CG18605	0.453284	1.74544	0.832594	0.544424	0.44585	6.2481e-221	5.4699e-216
FBgn0051477	ATPsynepsilonL	0.449126	2.22176	0.83513	0.537792	0.435595	3.44007e-215	3.01161e-210
FBgn0031613	HP6	0.446669	2.35972	0.898542	0.497104	0.487191	1.74513e-244	1.52778e-239
FBgn0036809	CG12477	0.445032	1.84672	0.818009	0.544042	0.416215	1.89833e-204	1.6619e-199
FBgn0027494	RpS10a	0.438894	2.47143	0.861763	0.509298	0.46542	5.35634e-232	4.68921e-227
FBgn0262104	CG42857	0.429877	2.21868	0.805327	0.533792	0.41559	4.19692e-204	3.67419e-199
FBgn0031296	CG4415	0.41483	1.97457	0.835764	0.496348	0.418766	7.45865e-206	6.52967e-201
FBgn0040602	CG14545	0.413935	6.29882	0.994927	0.416046	0.499546	1.17773e-251	1.03105e-246
FBgn0036730	qjt	0.411961	1.48514	0.783767	0.525616	0.415146	7.36365e-204	6.44651e-199
FBgn0032375	CG14932	0.406511	1.43188	0.753329	0.53962	0.378717	4.75846e-184	4.1658e-179
FBgn0034259	P32	0.401008	6.51178	0.996195	0.402539	0.473122	2.15347e-236	1.88526e-231
FBgn0001120	gnu	0.400039	4.32203	0.974001	0.410717	0.462229	3.4951e-230	3.05978e-225
FBgn0030418	CG4004	0.398821	2.3299	0.923906	0.431669	0.390906	1.26345e-190	1.10608e-185
FBgn0266710	hog	0.397602	1.39567	0.769816	0.516489	0.381492	1.53021e-185	1.33962e-180
FBgn0052706	CG32706	0.394856	1.52043	0.827521	0.477156	0.408458	3.46525e-200	3.03365e-195
FBgn0085290	CG34261	0.393164	2.6099	0.946734	0.415284	0.417931	2.15235e-205	1.88427e-200
FBgn0037637	IscU	0.392332	3.72051	0.980977	0.39994	0.464247	2.49224e-231	2.18183e-226
FBgn0034255	Oxp	0.381494	2.45942	0.908687	0.41983	0.367505	4.79674e-178	4.19931e-173
FBgn0032089	Rcd-1r	0.380955	1.32356	0.721623	0.527914	0.345348	2.62682e-166	2.29965e-161
FBgn0029174	Fkbp59	0.378962	3.00338	0.965124	0.392656	0.396679	9.30465e-194	8.14576e-189
FBgn0034837	RpL22-like	0.377164	1.20199	0.656309	0.574675	0.31121	1.5408e-148	1.34889e-143
FBgn0033799	GLaz	0.374939	1.49483	0.844642	0.443903	0.364406	2.14985e-176	1.88208e-171
FBgn0031398	CG10880	0.372591	3.81956	0.98922	0.376651	0.418242	1.45083e-205	1.27013e-200
FBgn0037742	Rpt3R	0.372285	1.11687	0.738744	0.503944	0.333975	2.40323e-160	2.1039e-155
FBgn0032453	CG6180	0.371257	3.11878	0.971465	0.382162	0.390257	2.83488e-190	2.4818e-185
FBgn0029524	CG3176	0.365464	2.18366	0.908687	0.402189	0.399607	2.37078e-195	2.0755e-190
FBgn0028852	CG15262	0.364402	0.850737	0.5948	0.612647	0.308914	2.33927e-147	2.04792e-142
FBgn0038739	CG4686	0.363512	2.63857	0.953075	0.38141	0.361695	5.95783e-175	5.21578e-170
FBgn0035955	CG5194	0.363206	1.67124	0.85669	0.423965	0.325665	5.12778e-156	4.48911e-151
FBgn0263088	lncRNA:CR43356	0.362203	1.00671	0.697527	0.519268	0.35054	4.82338e-169	4.22263e-164
FBgn0036805	Chmp1	0.362192	4.02159	0.987952	0.366609	0.40399	9.63749e-198	8.43714e-193
FBgn0052625	CG32625	0.360856	2.54033	0.922004	0.391382	0.302922	2.78423e-144	2.43746e-139
FBgn0035471	Sc2	0.357886	2.86035	0.960051	0.372778	0.359936	5.12486e-174	4.48656e-169
FBgn0039356	CG5039	0.353782	1.47731	0.84591	0.418226	0.328389	1.96499e-157	1.72025e-152
FBgn0038311	CG14864	0.353439	0.803671	0.641091	0.551308	0.306278	5.29335e-146	4.63407e-141
FBgn0266918	CG32486	0.353296	5.51403	0.986049	0.358294	0.386611	2.65718e-188	2.32623e-183
FBgn0039869	CG1890	0.353151	2.56693	0.95371	0.370292	0.348657	4.75194e-168	4.16008e-163
FBgn0039766	CG15536	0.35296	2.19323	0.937857	0.376347	0.362233	3.08234e-175	2.69844e-170
FBgn0037549	CG7878	0.352508	2.18545	0.928345	0.379716	0.385483	1.0799e-187	9.45396e-183
FBgn0285951	mRpS34	0.352256	1.99803	0.912492	0.386037	0.34362	2.12822e-165	1.86315e-160
FBgn0033274	CG14757	0.351893	1.28802	0.77806	0.452269	0.342107	1.32496e-164	1.15994e-159
FBgn0032229	CG5045	0.351437	3.42561	0.991122	0.354585	0.378677	4.99916e-184	4.37651e-179
FBgn0050410	Rpi	0.350969	3.14411	0.974635	0.360103	0.36142	8.34261e-175	7.30354e-170
FBgn0024177	zpg	0.348218	6.40777	0.993025	0.350664	0.404276	6.72757e-198	5.88965e-193
FBgn0036290	CG10638	0.348129	2.14755	0.919467	0.37862	0.340952	5.35427e-164	4.68739e-159
FBgn0031497	SerRS	0.347974	3.37417	0.97844	0.355642	0.345677	1.76282e-166	1.54326e-161
FBgn0035608	blanks	0.346198	1.24011	0.664553	0.520949	0.298376	5.90046e-142	5.16556e-137
FBgn0011638	La	0.344915	3.6859	0.968294	0.356209	0.334695	1.01075e-160	8.84862e-156
FBgn0028836	CSN7	0.344061	3.96249	0.985415	0.349154	0.372375	1.19775e-180	1.04857e-175
FBgn0046214	vig2	0.343645	7.91686	0.998098	0.3443	0.379417	2.00036e-184	1.75122e-179
FBgn0260634	eIF4G2	0.343009	2.99018	0.958148	0.357992	0.340075	1.54462e-163	1.35224e-158
FBgn0032640	Sgt	0.342881	3.95592	0.991122	0.345953	0.362313	2.79536e-175	2.4472e-170
FBgn0039651	Cyt-c1L	0.34209	0.747379	0.592264	0.577598	0.292567	5.41446e-139	4.74009e-134
FBgn0039802	dj-1beta	0.341853	3.81661	0.986684	0.346467	0.362524	2.15856e-175	1.88971e-170
FBgn0036135	mRpL2	0.341677	2.69503	0.96449	0.354256	0.369607	3.61839e-179	3.16772e-174
FBgn0085279	CG34250	0.340743	2.76125	0.951807	0.357996	0.378098	1.02327e-183	8.95824e-179
FBgn0266521	stai	0.339493	9.84798	0.999366	0.339709	0.398924	5.58215e-195	4.88689e-190
FBgn0032400	CG6770	0.339491	7.2043	0.949905	0.357395	0.290186	8.80863e-138	7.71151e-133
FBgn0033624	CG12384	0.33901	5.57772	0.989854	0.342485	0.329935	3.07903e-158	2.69554e-153
FBgn0036488	CG6878	0.338514	4.06926	0.981611	0.344856	0.325811	4.30666e-156	3.77026e-151
FBgn0029148	NHP2	0.33736	12.2677	0.998732	0.337789	0.359583	7.88466e-174	6.90262e-169
FBgn0013347	TfIIA-S	0.337276	7.00387	0.998732	0.337704	0.373523	2.90878e-181	2.54649e-176
FBgn0010438	mtSSB	0.337269	3.88158	0.986049	0.342041	0.3609	1.57551e-174	1.37928e-169
FBgn0037852	Tpc1	0.337023	1.53195	0.853519	0.394862	0.35785	6.54958e-173	5.73383e-168
FBgn0028380	fal	0.336593	2.51505	0.954344	0.352696	0.35012	8.03177e-169	7.03141e-164
FBgn0040512	zetaCOP	0.336333	5.18263	0.996195	0.337618	0.365983	3.11005e-177	2.72269e-172
FBgn0036334	CG11267	0.334746	16.1964	1	0.334746	0.403733	1.33223e-197	1.16631e-192
FBgn0062440	EMRE	0.334311	3.95015	0.983513	0.339916	0.323727	5.20468e-155	4.55643e-150
FBgn0034986	mRpS17	0.334123	4.02376	0.986049	0.338851	0.313567	9.38926e-150	8.21983e-145
FBgn0044511	mRpS21	0.334009	4.70625	0.994927	0.335712	0.343449	2.61615e-165	2.2903e-160
FBgn0010551	Phb2	0.332293	5.56888	0.996829	0.33335	0.34325	3.32661e-165	2.91228e-160
FBgn0030085	CG6999	0.332281	1.02627	0.686113	0.484294	0.318945	1.56516e-152	1.37022e-147
FBgn0028997	nmdyn-D7	0.331975	1.56567	0.863031	0.384661	0.286302	8.26534e-136	7.2359e-131
FBgn0283536	Vha13	0.331712	6.75072	0.999366	0.331923	0.356825	2.28732e-172	2.00243e-167
FBgn0016038	Vsp37A	0.331297	1.98057	0.912492	0.363069	0.288346	7.58811e-137	6.64301e-132
FBgn0033351	AIMP1	0.331233	2.21516	0.935954	0.353899	0.312744	2.49573e-149	2.18489e-144
FBgn0024912	agt	0.330892	0.918044	0.715282	0.462603	0.281103	3.55119e-133	3.10889e-128
FBgn0039163	CG5515	0.330622	4.32876	0.98922	0.334225	0.319975	4.58811e-153	4.01666e-148
FBgn0003141	pr	0.330356	3.54817	0.981611	0.336545	0.334507	1.26735e-160	1.1095e-155
FBgn0042112	mRpL36	0.330288	3.978	0.986049	0.334961	0.3212	1.06412e-153	9.3158e-149
FBgn0031677	CG14036	0.330284	2.56974	0.916931	0.360206	0.274819	5.26691e-130	4.61092e-125
FBgn0032246	Wdfy2	0.330246	1.94744	0.909321	0.363178	0.29638	6.16873e-141	5.40041e-136
FBgn0030501	BthD	0.329814	4.4283	0.993659	0.331919	0.336682	9.24115e-162	8.09017e-157
FBgn0030520	Pdcd4	0.329179	17.003	1	0.329179	0.373752	2.1947e-181	1.92135e-176
FBgn0033906	ReepB	0.328634	3.42838	0.977172	0.336312	0.358486	3.01285e-173	2.6376e-168
FBgn0010278	Ssrp	0.327735	3.207	0.977172	0.335391	0.330443	1.673e-158	1.46463e-153
FBgn0031446	CG15398	0.327534	0.750955	0.565631	0.57906	0.277079	3.82379e-131	3.34754e-126
FBgn0036335	mRpL20	0.327424	2.13096	0.903614	0.36235	0.278579	6.68951e-132	5.85633e-127
FBgn0260484	HIP	0.327405	2.28184	0.933418	0.350759	0.294674	4.57342e-140	4.0038e-135
FBgn0034879	Rrp4	0.32724	1.96307	0.896639	0.364962	0.328383	1.9787e-157	1.73226e-152
FBgn0040784	karr	0.327188	1.0839	0.627774	0.521187	0.284107	1.07172e-134	9.38234e-130
FBgn0035944	CG5021	0.326546	1.65412	0.866202	0.376987	0.326745	1.40782e-156	1.23248e-151
FBgn0036847	CNPYb	0.326396	1.75003	0.899176	0.362995	0.304204	6.13286e-145	5.36902e-140
FBgn0004087	Dhfr	0.325914	1.13479	0.772353	0.421976	0.309164	1.74044e-147	1.52367e-142
FBgn0030311	CG11699	0.325813	5.9437	0.996195	0.327057	0.331988	2.61739e-159	2.29139e-154
FBgn0037739	CG12948	0.325806	4.14639	0.991756	0.328514	0.356401	3.83785e-172	3.35985e-167
FBgn0020270	mre11	0.325789	1.55698	0.859226	0.379165	0.275767	1.75325e-130	1.53488e-125
FBgn0038830	CG17272	0.325652	3.49562	0.983513	0.331111	0.325184	9.12412e-156	7.98771e-151
FBgn0033413	prel	0.325445	1.45698	0.841471	0.386757	0.306974	2.32284e-146	2.03353e-141
FBgn0035148	CG3402	0.325051	2.12233	0.925174	0.35134	0.303163	2.09524e-144	1.83428e-139
FBgn0039585	CG1894	0.325029	0.883133	0.637286	0.51002	0.30509	2.15422e-145	1.88591e-140
FBgn0035164	CG13901	0.324763	1.96129	0.916931	0.354184	0.286735	4.98774e-136	4.36652e-131
FBgn0038437	Sdhaf3	0.324411	1.83576	0.905517	0.358261	0.300954	2.83578e-143	2.48258e-138
FBgn0002031	l(2)37Cc	0.324268	4.05699	0.987318	0.328433	0.309395	1.32288e-147	1.15812e-142
FBgn0037913	fabp	0.324256	22.2565	1	0.324256	0.361962	4.29449e-175	3.75962e-170
FBgn0040660	CG13551	0.324141	10.8444	1	0.324141	0.347107	3.11417e-167	2.7263e-162
FBgn0033174	CG11125	0.323032	0.90568	0.691186	0.46736	0.256954	4.69928e-121	4.11399e-116
FBgn0022344	CG10340	0.320987	2.12758	0.937857	0.342255	0.337588	3.10102e-162	2.71478e-157
FBgn0011787	mRpL12	0.320704	6.64734	1	0.320704	0.33212	2.23406e-159	1.95581e-154
FBgn0035335	mRpL23	0.320703	3.75558	0.97844	0.32777	0.30102	2.62273e-143	2.29607e-138
FBgn0036774	mRpS26	0.320601	3.0744	0.970831	0.330234	0.307725	9.55639e-147	8.36614e-142
FBgn0036641	Smn	0.320586	4.73326	0.991122	0.323457	0.309992	6.52223e-148	5.70989e-143
FBgn0262732	mbf1	0.320542	5.22171	0.998098	0.321153	0.353437	1.42136e-170	1.24433e-165
FBgn0031263	Tspo	0.320365	1.35406	0.807229	0.39687	0.235889	1.27295e-110	1.1144e-105
FBgn0035438	PHGPx	0.319934	4.08505	0.981611	0.325927	0.315783	6.74571e-151	5.90553e-146
FBgn0039002	CG17625	0.319909	0.757368	0.622701	0.513744	0.288641	5.37317e-137	4.70395e-132
FBgn0039404	CG14543	0.319276	1.31392	0.80279	0.397708	0.302915	2.80723e-144	2.45759e-139
FBgn0039537	CG5590	0.319243	2.68136	0.96449	0.330997	0.288632	5.43141e-137	4.75493e-132
FBgn0030994	HP1D3csd	0.319154	0.990386	0.650602	0.490551	0.284579	6.18012e-135	5.41038e-130
FBgn0027359	Tim8	0.318733	5.64648	0.994927	0.320358	0.301016	2.63437e-143	2.30626e-138
FBgn0015283	Rpn10	0.318211	5.24535	0.998732	0.318615	0.346228	9.03551e-167	7.91014e-162
FBgn0034822	RpL37b	0.317968	1.16863	0.589727	0.539178	0.275716	1.85963e-130	1.62801e-125
FBgn0019982	Gs1l	0.317771	1.14089	0.769182	0.413128	0.242076	1.13359e-113	9.924e-109
FBgn0085257	CG34228	0.317577	1.65473	0.871275	0.364497	0.293385	2.07533e-139	1.81685e-134
FBgn0024542	Neos	0.317501	2.44751	0.931516	0.340844	0.261328	3.08688e-123	2.70241e-118
FBgn0039233	CG7006	0.316501	3.08548	0.96766	0.327078	0.287034	3.5168e-136	3.07879e-131
FBgn0040078	pont	0.316331	2.88555	0.959417	0.329712	0.279336	2.77555e-132	2.42986e-127
FBgn0028992	sds22	0.31625	2.32675	0.928979	0.340428	0.269567	2.30502e-127	2.01793e-122
FBgn0029118	ScsbetaG	0.316128	1.91794	0.914394	0.345723	0.284723	5.22425e-135	4.57357e-130
FBgn0053494	CG33494	0.315992	0.960157	0.635384	0.497325	0.255245	3.33663e-120	2.92105e-115
FBgn0024558	Dph5	0.315928	4.9958	0.98922	0.31937	0.303585	1.27417e-144	1.11547e-139
FBgn0038453	Arl6IP1	0.31585	4.62275	0.994293	0.317663	0.341419	3.04472e-164	2.6655e-159
FBgn0021765	scu	0.31584	6.71461	0.996195	0.317047	0.3169	1.78637e-151	1.56387e-146
FBgn0003462	Sod1	0.31583	9.36418	0.999366	0.31603	0.33526	5.12388e-161	4.4857e-156
FBgn0038678	mRpL55	0.31578	3.78053	0.984147	0.320867	0.300365	5.67516e-143	4.96832e-138
FBgn0027619	eIF3j	0.315695	3.10702	0.972099	0.324756	0.302967	2.64247e-144	2.31335e-139
FBgn0284436	CCT8	0.315573	4.41324	0.990488	0.318604	0.305559	1.23737e-145	1.08326e-140
FBgn0033921	tej	0.315485	1.26735	0.775523	0.406803	0.252108	1.21217e-118	1.0612e-113
FBgn0262524	ver	0.315472	1.21456	0.795181	0.39673	0.261177	3.6746e-123	3.21693e-118
FBgn0031043	Naa20A	0.315325	2.92355	0.957514	0.329317	0.284337	8.19132e-135	7.17109e-130
FBgn0266582	ND-30	0.315289	4.43004	0.994927	0.316896	0.290752	4.54123e-138	3.97562e-133
FBgn0030834	CG8675	0.314716	2.44286	0.941027	0.334439	0.263272	3.29411e-124	2.88383e-119
FBgn0025336	CG4882	0.314707	1.8748	0.896005	0.351234	0.284212	9.4821e-135	8.3011e-130
FBgn0032394	Hacd1	0.314504	2.31497	0.946734	0.332199	0.309353	1.39076e-147	1.21754e-142
FBgn0044020	Roc2	0.314099	2.54704	0.955612	0.328689	0.289768	1.43732e-137	1.2583e-132
FBgn0035082	CG2811	0.313752	2.19379	0.934686	0.335676	0.25798	1.4482e-121	1.26783e-116
FBgn0035032	ATPsynF	0.313603	17.9812	1	0.313603	0.371433	3.82439e-180	3.34806e-175
FBgn0040752	Prosap	0.313484	4.48634	0.98922	0.3169	0.290208	8.58809e-138	7.51844e-133
FBgn0034362	CG5323	0.313477	3.08871	0.96449	0.325018	0.264577	7.32643e-125	6.41392e-120
FBgn0011327	Uch-L5	0.313402	4.8498	0.996195	0.314599	0.332735	1.06674e-159	9.3388e-155
FBgn0034118	Nup62	0.313321	4.12521	0.987952	0.317142	0.29361	1.59333e-139	1.39488e-134
FBgn0039265	CG11790	0.313157	1.75312	0.883323	0.354522	0.244422	7.84434e-115	6.86733e-110
FBgn0261793	Trf2	0.313126	15.054	1	0.313126	0.334762	9.32018e-161	8.15935e-156
FBgn0025832	Fen1	0.312886	1.03806	0.736208	0.424997	0.277387	2.67228e-131	2.33945e-126
FBgn0032511	ND-B22	0.312795	6.6601	0.999366	0.312993	0.30016	7.2254e-143	6.32548e-138
FBgn0036815	HipHop	0.312775	3.14603	0.973367	0.321334	0.3178	6.12156e-152	5.35912e-147
FBgn0029885	CG3224	0.312629	4.92839	0.987318	0.316645	0.263137	3.84782e-124	3.36858e-119
FBgn0283450	Glo1	0.31237	4.4395	0.991756	0.314967	0.29931	1.96482e-142	1.72011e-137
FBgn0017429	CG5989	0.31218	1.21759	0.793278	0.393531	0.279227	3.15018e-132	2.75783e-127
FBgn0035571	CG12493	0.312099	1.03669	0.611921	0.510031	0.266888	5.09203e-126	4.45782e-121
FBgn0038519	Prx3	0.312084	4.01405	0.986684	0.316296	0.300151	7.30459e-143	6.39481e-138
FBgn0261266	zuc	0.312005	2.19749	0.939759	0.332005	0.296356	6.3408e-141	5.55105e-136
FBgn0033357	Tom7	0.311946	14.0086	1	0.311946	0.311244	1.47883e-148	1.29464e-143
FBgn0031315	CG14341	0.311828	1.76533	0.885859	0.352007	0.251798	1.72869e-118	1.51338e-113
FBgn0037340	CG14671	0.311721	2.05925	0.919467	0.339023	0.264267	1.04668e-124	9.16315e-120
FBgn0015245	Hsp60A	0.311581	4.71906	0.991756	0.314171	0.285712	1.6466e-135	1.44151e-130
FBgn0035046	ND-19	0.311501	5.24563	0.993659	0.313489	0.281774	1.62489e-133	1.42251e-128
FBgn0037749	CG9471	0.311122	2.36038	0.941661	0.330397	0.284681	5.48411e-135	4.80107e-130
FBgn0083968	CG34132	0.311023	3.57545	0.976538	0.318496	0.326278	2.46178e-156	2.15516e-151
FBgn0034534	maf-S	0.310684	6.87136	0.997464	0.311474	0.329434	5.61472e-158	4.91541e-153
FBgn0264294	Cyt-b5	0.310522	9.25756	1	0.310522	0.321099	1.20096e-153	1.05138e-148
FBgn0029860	CG15891	0.310377	1.99265	0.897907	0.345667	0.271553	2.31725e-128	2.02864e-123
FBgn0085436	Not1	0.31034	8.44886	0.998098	0.310932	0.320093	3.98315e-153	3.48705e-148
FBgn0035532	CG15014	0.310247	1.14909	0.754597	0.411142	0.249842	1.61787e-117	1.41636e-112
FBgn0038307	mRpS10	0.31005	4.45223	0.993659	0.312028	0.273905	1.51903e-129	1.32983e-124
FBgn0262511	Vha44	0.309864	2.65193	0.955612	0.324257	0.266483	8.12785e-126	7.11553e-121
FBgn0034242	CG14480	0.309857	3.50028	0.984781	0.314646	0.310796	2.51623e-148	2.20283e-143
FBgn0036111	Aps	0.309779	5.18145	0.997464	0.310566	0.303763	1.032e-144	9.03463e-140
FBgn0031437	Arpc5	0.309679	5.06797	0.996829	0.310664	0.276697	5.95921e-131	5.21699e-126
FBgn0034579	mRpL54	0.309472	2.44354	0.944832	0.327542	0.264729	6.14709e-125	5.38147e-120
FBgn0031047	Rcd-1	0.308999	3.07151	0.970197	0.318491	0.281427	2.43401e-133	2.13085e-128
FBgn0083983	mRpL34	0.308586	4.45655	0.993659	0.310556	0.266945	4.76561e-126	4.17205e-121
FBgn0015299	Ssb-c31a	0.308413	10.9557	1	0.308413	0.404843	3.2961e-198	2.88557e-193
FBgn0036918	Pfdn6	0.308391	4.75908	0.995561	0.309766	0.302321	5.65886e-144	4.95405e-139
FBgn0032634	Rpb11	0.308338	6.49176	0.998732	0.30873	0.306379	4.69635e-146	4.11142e-141
FBgn0027579	mino	0.308308	1.33029	0.796449	0.387104	0.251547	2.3035e-118	2.0166e-113
FBgn0010282	TfIIFalpha	0.308283	3.88111	0.984147	0.313249	0.247897	1.49114e-116	1.30542e-111
FBgn0032198	eEF1delta	0.308105	13.3529	0.999366	0.3083	0.285712	1.64669e-135	1.44159e-130
FBgn0034051	Mlf	0.308099	4.42287	0.991756	0.31066	0.312167	4.94851e-149	4.33217e-144
FBgn0010747	Srp54k	0.30784	2.47461	0.954978	0.322353	0.271473	2.5423e-128	2.22565e-123
FBgn0052817	CG32817	0.30765	0.860203	0.633481	0.48565	0.255388	2.83251e-120	2.47972e-115
FBgn0024956	Mat1	0.307263	1.36246	0.826252	0.371875	0.257676	2.05366e-121	1.79787e-116
FBgn0053506	CG33506	0.306985	1.52348	0.854788	0.359136	0.290172	8.96019e-138	7.8442e-133
FBgn0003527	stil	0.306787	1.21624	0.776791	0.394942	0.26797	1.45999e-126	1.27814e-121
FBgn0054012	CG34012	0.306666	0.866897	0.635384	0.482648	0.264589	7.22082e-125	6.32147e-120
FBgn0037891	CG5214	0.306652	1.76829	0.889664	0.344683	0.234202	8.61131e-110	7.53877e-105
FBgn0037930	CG14715	0.306615	5.79694	0.998098	0.3072	0.296038	9.22115e-141	8.07265e-136
FBgn0264751	Vti1b	0.306384	2.39923	0.954978	0.320829	0.270606	6.93138e-128	6.06808e-123
FBgn0038857	Bdbt	0.306225	1.82154	0.884591	0.346177	0.240946	4.09648e-113	3.58627e-108
FBgn0029823	Shmt	0.306077	2.00434	0.911224	0.335896	0.272445	8.25115e-129	7.22347e-124
FBgn0000318	cl	0.305921	4.51216	0.989854	0.309057	0.269659	2.07288e-127	1.8147e-122
FBgn0037878	CG6693	0.305895	2.51838	0.948637	0.322458	0.248916	4.66077e-117	4.08027e-112
FBgn0039129	RpS19b	0.30568	0.951344	0.582752	0.524546	0.267012	4.41354e-126	3.86383e-121
FBgn0031479	Prx6005	0.305636	1.49766	0.845276	0.361581	0.253019	4.27306e-119	3.74085e-114
FBgn0261243	Psa	0.305522	2.19954	0.925808	0.330006	0.317494	8.81658e-152	7.71848e-147
FBgn0032703	CG10343	0.305503	2.55989	0.95371	0.320331	0.252113	1.20636e-118	1.05611e-113
FBgn0035473	mge	0.305371	4.56605	0.990488	0.308303	0.305739	1.00131e-145	8.76594e-141
FBgn0039697	CG7834	0.305311	5.37245	0.996829	0.306282	0.265092	4.04168e-125	3.53829e-120
FBgn0283442	vas	0.305304	3.5666	0.968294	0.315301	0.292572	5.38468e-139	4.71402e-134
FBgn0014028	SdhB	0.305184	3.79344	0.983513	0.3103	0.26227	1.04374e-123	9.13743e-119
FBgn0022069	Nnp-1	0.305105	2.51144	0.93532	0.326204	0.236109	9.92816e-111	8.69161e-106
FBgn0011455	ND-SGDH	0.304983	8.42858	1	0.304983	0.31597	5.39988e-151	4.72732e-146
FBgn0022943	Cbp20	0.304811	5.11974	0.993025	0.306952	0.273131	3.72626e-129	3.26215e-124
FBgn0032160	CG4598	0.304726	1.84375	0.891566	0.341787	0.256892	5.04952e-121	4.4206e-116
FBgn0023477	Taldo	0.304694	3.5155	0.968928	0.314465	0.254144	1.17816e-119	1.03142e-114
FBgn0263398	Uck	0.304467	2.32319	0.941027	0.323548	0.303523	1.36987e-144	1.19926e-139
FBgn0032595	CG17996	0.304395	1.73688	0.894737	0.340206	0.265365	2.95211e-125	2.58442e-120
FBgn0033261	udd	0.304387	3.15541	0.97844	0.311094	0.277036	4.02061e-131	3.51984e-126
FBgn0036188	CG7339	0.304345	2.96668	0.968294	0.314311	0.295441	1.85907e-140	1.62753e-135
FBgn0034232	CG4866	0.304031	3.44943	0.982245	0.309526	0.264209	1.11896e-124	9.79597e-120
FBgn0034368	zda	0.303968	3.00726	0.975269	0.311676	0.273912	1.50681e-129	1.31914e-124
FBgn0032847	Taf13	0.303724	4.56199	0.991756	0.306248	0.276125	1.15788e-130	1.01367e-125
FBgn0013269	Fkbp39	0.303587	18.3868	1	0.303587	0.360484	2.6211e-174	2.29465e-169
FBgn0028833	Dak1	0.30289	2.86878	0.966392	0.313424	0.24884	5.08504e-117	4.4517e-112
FBgn0038723	CG6195	0.302721	1.90272	0.906785	0.33384	0.259223	3.47225e-122	3.03978e-117
FBgn0035906	GstO2	0.302594	2.38696	0.943564	0.320693	0.253733	1.88789e-119	1.65275e-114
FBgn0031660	mRpL28	0.302315	2.2024	0.932784	0.3241	0.249006	4.20609e-117	3.68222e-112
FBgn0033179	p47	0.301987	1.8856	0.899176	0.335849	0.252534	7.44789e-119	6.52026e-114
FBgn0260985	RfC4	0.301883	2.92072	0.957514	0.315278	0.266777	5.78715e-126	5.06636e-121
FBgn0035415	CG14966	0.301859	2.79346	0.963855	0.313179	0.271527	2.3896e-128	2.09198e-123
FBgn0031996	CG8460	0.301815	1.51387	0.820545	0.367823	0.231841	1.245e-108	1.08994e-103
FBgn0032884	Pomp	0.301798	9.5579	1	0.301798	0.296431	5.81193e-141	5.08805e-136
FBgn0003028	ovo	0.301779	3.40536	0.96766	0.311865	0.266396	8.98992e-126	7.87022e-121
FBgn0038964	Nop56	0.301433	8.50067	0.998098	0.302008	0.251317	2.99808e-118	2.62467e-113
FBgn0036928	Tom20	0.301389	11.8519	1	0.301389	0.309253	1.56649e-147	1.37139e-142
FBgn0043002	Chrac-14	0.301359	7.08272	0.998098	0.301934	0.299488	1.59443e-142	1.39584e-137
FBgn0036820	Grx1	0.301108	2.47776	0.944198	0.318904	0.260824	5.51118e-123	4.82476e-118
FBgn0035541	CG15019	0.30106	9.90145	1	0.30106	0.266234	1.08369e-125	9.48718e-121
FBgn0035271	CG2021	0.300841	4.24709	0.984781	0.30549	0.284112	1.06486e-134	9.32234e-130
FBgn0015828	TfIIEalpha	0.300591	1.96862	0.919467	0.326919	0.247645	1.98962e-116	1.74181e-111
FBgn0015019	CCT3	0.300388	7.95332	0.998732	0.30077	0.268335	9.58006e-127	8.38686e-122
FBgn0039115	CG10214	0.30009	2.89674	0.958148	0.313197	0.241431	2.35823e-113	2.06451e-108
FBgn0034646	Rae1	0.300026	2.69059	0.961319	0.312098	0.262782	5.79227e-124	5.07085e-119
FBgn0032050	zda	0.300015	3.41147	0.982879	0.305241	0.238395	7.42454e-112	6.49981e-107
FBgn0004901	Prat	0.299242	1.54151	0.837666	0.357233	0.268917	4.88599e-127	4.27744e-122
FBgn0024841	Pcd	0.299174	1.91614	0.891566	0.33556	0.244003	1.26402e-114	1.10659e-109
FBgn0028408	Drep2	0.299121	4.43517	0.991122	0.3018	0.284644	5.72741e-135	5.01406e-130
FBgn0037777	CG11722	0.298982	0.910516	0.691186	0.432564	0.223879	9.90228e-105	8.66895e-100
FBgn0083986	CG34150	0.298976	1.29784	0.796449	0.375387	0.272504	7.70907e-129	6.74891e-124
FBgn0023171	rnh1	0.298941	1.32593	0.820545	0.36432	0.24463	6.18763e-115	5.41696e-110
FBgn0033381	GstE13	0.29889	1.29504	0.807863	0.369976	0.234147	9.16272e-110	8.02151e-105
FBgn0053002	mRpL27	0.298715	2.75907	0.961953	0.310529	0.247231	3.18983e-116	2.79254e-111
FBgn0028693	Rpn12	0.298687	4.41776	0.984781	0.303303	0.265886	1.61922e-125	1.41755e-120
FBgn0036173	CG7394	0.298641	2.17496	0.930881	0.320815	0.241937	1.32702e-113	1.16174e-108
FBgn0035499	Chd64	0.29864	4.29951	0.983513	0.303646	0.293557	1.69601e-139	1.48477e-134
FBgn0001092	Gapdh2	0.298293	4.29249	0.927077	0.321756	0.241872	1.42884e-113	1.25088e-108
FBgn0037723	SpdS	0.29825	1.87439	0.884591	0.337162	0.251488	2.46487e-118	2.15787e-113
FBgn0026761	Trap1	0.298156	1.66576	0.864933	0.344716	0.244503	7.14943e-115	6.25897e-110
FBgn0036728	UQCR-Q	0.298107	23.511	1	0.298107	0.349067	2.88799e-168	2.52829e-163
FBgn0040534	Sf3b5	0.298005	5.63072	0.994293	0.299715	0.257948	1.50221e-121	1.31511e-116
FBgn0037244	CG14647	0.297879	1.77173	0.88903	0.33506	0.290601	5.41915e-138	4.7442e-133
FBgn0039691	IntS11	0.297796	2.1029	0.927077	0.32122	0.244377	8.2549e-115	7.22675e-110
FBgn0029979	mahe	0.297736	2.62016	0.94293	0.315756	0.26801	1.3946e-126	1.2209e-121
FBgn0004106	Cdk1	0.297456	6.33404	0.993025	0.299546	0.248728	5.7748e-117	5.05555e-112
FBgn0015282	Rpt2	0.297278	4.94679	0.995561	0.298604	0.285713	1.6443e-135	1.4395e-130
FBgn0286786	hoip	0.297252	4.19997	0.949271	0.313137	0.254778	5.70026e-120	4.99029e-115
FBgn0034902	CG5532	0.297248	3.68203	0.987318	0.301066	0.252309	9.63147e-119	8.43187e-114
FBgn0035272	mRpL46	0.297233	1.11444	0.774255	0.383896	0.246238	9.90179e-116	8.66852e-111
FBgn0037299	Vps37B	0.297043	1.60231	0.871275	0.34093	0.254345	9.35836e-120	8.19278e-115
FBgn0050373	CG30373	0.296977	1.494	0.850983	0.348981	0.292346	7.0213e-139	6.14679e-134
FBgn0037632	CCT7	0.296713	4.18795	0.990488	0.299562	0.267294	3.18776e-126	2.79073e-121
FBgn0052438	SMC5	0.29657	1.68507	0.864933	0.342882	0.264816	5.55619e-125	4.86417e-120
FBgn0038363	Acyp2	0.296461	2.0075	0.905517	0.327394	0.236425	6.94034e-111	6.07592e-106
FBgn0038056	CG5961	0.296447	1.07385	0.752061	0.39418	0.233643	1.62162e-109	1.41965e-104
FBgn0262515	VhaAC45	0.296365	3.57078	0.979074	0.302699	0.250419	8.36812e-118	7.32587e-113
FBgn0034793	asrij	0.296304	1.87539	0.903614	0.32791	0.234425	6.68881e-110	5.85572e-105
FBgn0035726	CG9953	0.296268	3.39403	0.975904	0.303583	0.261432	2.73998e-123	2.39871e-118
FBgn0038540	CG14321	0.296247	1.58058	0.81357	0.364132	0.307168	1.84759e-146	1.61747e-141
FBgn0029665	CG14270	0.296041	1.961	0.908687	0.32579	0.251468	2.52166e-118	2.20758e-113
FBgn0002787	Rpn8	0.296026	2.51512	0.953075	0.3106	0.257669	2.06992e-121	1.81211e-116
FBgn0086378	Alg-2	0.29597	4.16619	0.988586	0.299388	0.264027	1.38077e-124	1.20879e-119
FBgn0031607	CG15440	0.295929	1.47079	0.842105	0.351415	0.259957	1.49393e-122	1.30786e-117
FBgn0027785	NP15.6	0.295896	6.18903	0.998732	0.296272	0.238238	8.87368e-112	7.76846e-107
FBgn0010808	Chchd3	0.295813	2.62945	0.955612	0.309554	0.231058	3.01565e-108	2.64005e-103
FBgn0037087	CG7519	0.295806	3.05139	0.961319	0.307708	0.238464	6.86894e-112	6.01341e-107
FBgn0037001	ND-39	0.295725	3.55623	0.979708	0.30185	0.238131	1.00182e-111	8.77043e-107
FBgn0031459	CG2862	0.295628	7.00332	0.998732	0.296004	0.285735	1.60403e-135	1.40425e-130
FBgn0039909	ND-49	0.295515	2.24077	0.927711	0.318542	0.245769	1.6898e-115	1.47933e-110
FBgn0038190	CG9926	0.295393	0.853668	0.650602	0.45403	0.244744	5.43764e-115	4.76038e-110
FBgn0051648	CG31648	0.295278	0.927968	0.703234	0.419885	0.262964	4.69573e-124	4.11088e-119
FBgn0031092	CG9577	0.295264	1.05903	0.73811	0.400027	0.231189	2.60038e-108	2.2765e-103
FBgn0015222	Fer1HCH	0.29514	13.5789	1	0.29514	0.27816	1.08919e-131	9.53532e-127
FBgn0021768	nudC	0.295069	3.07534	0.95688	0.308366	0.240523	6.62098e-113	5.79633e-108
FBgn0010741	Pfdn2	0.294964	4.2961	0.992391	0.297226	0.252814	5.40758e-119	4.73407e-114
FBgn0011768	Fdh	0.294849	3.3682	0.970831	0.303708	0.252131	1.18121e-118	1.03409e-113
FBgn0032833	COX4	0.294844	12.5622	1	0.294844	0.301922	9.05931e-144	7.93097e-139
FBgn0031357	mRpL48	0.294829	1.95056	0.907419	0.32491	0.248749	5.64176e-117	4.93908e-112
FBgn0040899	CG17776	0.294576	2.94234	0.954978	0.308463	0.224556	4.62128e-105	4.0457e-100
FBgn0011227	ox	0.294193	16.3264	1	0.294193	0.286358	7.74884e-136	6.78372e-131
FBgn0038145	Droj2	0.294177	11.4632	0.999366	0.294363	0.271535	2.36533e-128	2.07073e-123
FBgn0262743	Fs(2)Ket	0.294172	2.31651	0.943564	0.311767	0.271102	3.90617e-128	3.41966e-123
FBgn0250906	Pgk	0.294136	2.25786	0.932784	0.315331	0.241716	1.70663e-113	1.49407e-108
FBgn0029718	mRpL30	0.294045	3.06826	0.96766	0.303873	0.222777	3.42275e-104	2.99645e-99
FBgn0021967	ND-PDSW	0.293945	7.92146	0.998732	0.294318	0.248805	5.29074e-117	4.63178e-112
FBgn0029676	HIP-R	0.293738	2.0286	0.916297	0.320571	0.24429	9.12139e-115	7.98532e-110
FBgn0021814	Vps28	0.293724	2.76838	0.960685	0.305745	0.27638	8.61004e-131	7.53766e-126
FBgn0033961	ND-B15	0.293723	4.3481	0.994293	0.295409	0.255799	1.76827e-120	1.54803e-115
FBgn0001989	ND-B17	0.293717	4.90642	0.995561	0.295026	0.251758	1.81106e-118	1.58549e-113
FBgn0030294	Pa1	0.29365	5.37477	0.996195	0.294771	0.319313	1.0098e-152	8.84033e-148
FBgn0047038	ND-13B	0.29352	2.88792	0.968928	0.302932	0.288425	6.9136e-137	6.05251e-132
FBgn0053051	CG33051	0.293514	1.33907	0.807863	0.363322	0.238285	8.41462e-112	7.36658e-107
FBgn0035323	CG13807	0.29345	2.24312	0.92454	0.317401	0.222852	3.14475e-104	2.75307e-99
FBgn0026566	CG1307	0.293317	6.72682	0.999366	0.293503	0.276099	1.19321e-130	1.04459e-125
FBgn0028687	Rpt1	0.293243	5.31523	0.995561	0.294551	0.260076	1.30223e-122	1.14004e-117
FBgn0035334	CG8993	0.293197	1.2829	0.779962	0.375912	0.244021	1.23908e-114	1.08476e-109
FBgn0033554	Lsm10	0.292795	1.71904	0.886493	0.330285	0.253733	1.88776e-119	1.65264e-114
FBgn0030853	ND-24	0.29262	2.97068	0.963221	0.303794	0.256686	6.39651e-121	5.59982e-116
FBgn0026207	mbo	0.292462	2.08778	0.916297	0.319178	0.239005	3.71446e-112	3.25182e-107
FBgn0042213	CG18731	0.292397	1.36605	0.821179	0.356069	0.230061	9.31117e-108	8.15146e-103
FBgn0032781	RtcB	0.292285	1.12046	0.760304	0.384432	0.243577	2.05331e-114	1.79757e-109
FBgn0052409	CG32409	0.292109	3.55482	0.974001	0.299906	0.213881	7.38472e-100	6.46495e-95
FBgn0028684	Rpt5	0.292031	2.53037	0.95371	0.306205	0.266843	5.36337e-126	4.69536e-121
FBgn0019686	lok	0.29199	4.9401	0.974635	0.299589	0.257727	1.93665e-121	1.69544e-116
FBgn0024432	Dlc90F	0.291948	6.45822	0.998732	0.292319	0.278363	8.6043e-132	7.53263e-127
FBgn0031684	ND-13A	0.29187	4.5934	0.991122	0.294484	0.249998	1.3535e-117	1.18492e-112
FBgn0000114	bru1	0.291605	3.7009	0.977172	0.298417	0.295736	1.31371e-140	1.15009e-135
FBgn0038400	CG5903	0.291604	2.99734	0.965758	0.301944	0.203916	4.98344e-95	4.36275e-90
FBgn0003275	RpII18	0.291469	11.4183	0.999366	0.291654	0.273772	1.77329e-129	1.55242e-124
FBgn0032451	spict	0.291463	1.51313	0.837032	0.34821	0.242279	8.98987e-114	7.87018e-109
FBgn0038224	ATPsynE	0.291433	16.1969	1	0.291433	0.271334	2.98672e-128	2.61472e-123
FBgn0036726	QIL1	0.291274	6.64339	0.999366	0.291458	0.263063	4.1886e-124	3.66691e-119
FBgn0039159	mRpS24	0.291078	2.31699	0.939125	0.309946	0.227749	1.26557e-106	1.10794e-101
FBgn0036661	CG9705	0.291072	6.5885	0.995561	0.29237	0.256757	5.89587e-121	5.16154e-116
FBgn0027945	ppl	0.291049	1.75707	0.882055	0.329967	0.23385	1.28218e-109	1.12249e-104
FBgn0035252	CG7970	0.290997	2.52212	0.947368	0.307164	0.24604	1.24032e-115	1.08583e-110
FBgn0039743	CG7946	0.290974	2.82835	0.96766	0.300699	0.280313	8.90154e-133	7.79286e-128
FBgn0016120	ATPsynD	0.290917	13.5488	1	0.290917	0.276159	1.11259e-130	9.74013e-126
FBgn0034061	Ufc1	0.290793	2.04616	0.915029	0.317797	0.225078	2.56799e-105	2.24815e-100
FBgn0019957	ND-42	0.290395	4.12293	0.990488	0.293184	0.245757	1.71402e-115	1.50054e-110
FBgn0034091	mrj	0.290181	1.95297	0.908053	0.319564	0.236552	6.00811e-111	5.2598e-106
FBgn0030610	CG9065	0.2901	1.4257	0.79962	0.362797	0.272153	1.15727e-128	1.01313e-123
FBgn0023519	mRpL16	0.290071	3.01585	0.962587	0.301345	0.216891	2.53691e-101	2.22093e-96
FBgn0038925	Cchl	0.289976	4.22587	0.989854	0.292948	0.235992	1.13327e-110	9.92121e-106
FBgn0035592	CG10674	0.289861	2.53931	0.950539	0.304944	0.240332	8.22995e-113	7.20491e-108
FBgn0038462	CG17556	0.289796	4.55149	0.984781	0.294275	0.223882	9.86748e-105	8.63848e-100
FBgn0261439	SdhA	0.289785	1.46119	0.842739	0.34386	0.215832	8.31897e-101	7.28284e-96
FBgn0020369	Rpt6	0.2897	7.15776	0.994927	0.291178	0.245848	1.54475e-115	1.35235e-110
FBgn0030025	CG2147	0.289588	2.0272	0.900444	0.321606	0.232556	5.54559e-109	4.85489e-104
FBgn0037607	CG8036	0.289483	3.03839	0.973367	0.297403	0.274437	8.19725e-130	7.17628e-125
FBgn0032242	CG5355	0.289432	1.95903	0.909321	0.318295	0.249705	1.89338e-117	1.65756e-112
FBgn0037051	CG10565	0.289301	3.5144	0.982879	0.294341	0.255254	3.3028e-120	2.89144e-115
FBgn0031639	mRpS2	0.289244	1.66311	0.873177	0.331255	0.259648	2.1319e-122	1.86637e-117
FBgn0024352	Stip1	0.289197	3.14062	0.963221	0.300239	0.252293	9.81462e-119	8.59221e-114
FBgn0028479	Mtpalpha	0.289061	2.26979	0.908687	0.318108	0.204305	3.22993e-95	2.82765e-90
FBgn0035155	RabX6	0.288969	1.03442	0.735574	0.392849	0.217288	1.62731e-101	1.42463e-96
FBgn0026370	SRPK	0.288794	4.42828	0.993025	0.290822	0.272622	6.72458e-129	5.88704e-124
FBgn0051184	LSm3	0.288661	4.63038	0.991756	0.291061	0.264474	8.24787e-125	7.2206e-120
FBgn0250868	CG42239	0.288607	2.97839	0.968928	0.297862	0.235588	1.79094e-110	1.56788e-105
FBgn0044030	mRpS14	0.288607	3.34115	0.973367	0.296504	0.222274	6.02163e-104	5.27164e-99
FBgn0025457	Bub3	0.288523	3.77804	0.984147	0.293171	0.24011	1.05845e-112	9.2662e-108
FBgn0034919	CG5569	0.288468	1.25451	0.800254	0.360471	0.22827	7.02811e-107	6.15276e-102
FBgn0032105	borr	0.288467	4.80679	0.974635	0.295975	0.20901	1.70806e-97	1.49532e-92
FBgn0260648	Rrp40	0.288345	1.95265	0.894103	0.322497	0.246529	7.10323e-116	6.21852e-111
FBgn0032000	CG8372	0.288041	3.1654	0.973367	0.295922	0.252534	7.44731e-119	6.51975e-114
FBgn0052069	CG32069	0.288015	2.71598	0.959417	0.300198	0.246742	5.57243e-116	4.87838e-111
FBgn0085229	CG34200	0.287973	3.20837	0.96449	0.298575	0.247885	1.51306e-116	1.32461e-111
FBgn0038808	Srp14	0.287876	2.84163	0.972099	0.296139	0.235871	1.30012e-110	1.13819e-105
FBgn0035122	mRpL17	0.287812	1.75142	0.894103	0.321901	0.221071	2.33007e-103	2.03986e-98
FBgn0035850	Atg18a	0.287796	1.9478	0.901078	0.31939	0.264133	1.22194e-124	1.06974e-119
FBgn0032746	CG10470	0.287721	3.64177	0.986049	0.291792	0.239438	2.27286e-112	1.98978e-107
FBgn0035469	CG14977	0.287718	1.99281	0.913126	0.315091	0.225477	1.63796e-105	1.43395e-100
FBgn0033556	CG12343	0.287693	2.57993	0.939759	0.306135	0.213926	7.02721e-100	6.15197e-95
FBgn0264395	CG43843	0.287568	0.631649	0.506658	0.567579	0.234164	8.99348e-110	7.87334e-105
FBgn0033350	CG8237	0.287526	1.74492	0.897907	0.320218	0.239355	2.49578e-112	2.18493e-107
FBgn0026741	mRpL18	0.287353	2.4495	0.950539	0.302306	0.247601	2.09187e-116	1.83133e-111
FBgn0035083	Tina-1	0.287302	2.24997	0.925174	0.310538	0.235441	2.1162e-110	1.85263e-105
FBgn0016687	Nurf-38	0.287283	3.25166	0.97844	0.293614	0.237124	3.13884e-111	2.7479e-106
FBgn0030457	CG12096	0.287274	1.09068	0.757134	0.379423	0.240221	9.33943e-113	8.17621e-108
FBgn0035209	msd1	0.287214	2.54198	0.960051	0.299165	0.223843	1.03144e-104	9.02978e-100
FBgn0052856	CG32856	0.287167	1.86575	0.901078	0.318693	0.270453	8.27562e-128	7.24489e-123
FBgn0035829	HP4	0.286906	10.5461	1	0.286906	0.275321	2.94232e-130	2.57586e-125
FBgn0034215	Mtap	0.286784	1.60791	0.870006	0.329634	0.229438	1.88132e-107	1.647e-102
FBgn0264672	Eogt	0.286701	1.42014	0.837032	0.342521	0.274196	1.0851e-129	9.49951e-125
FBgn0259682	Jabba	0.286517	9.00989	0.982879	0.291508	0.259037	4.30269e-122	3.76679e-117
FBgn0010620	CG10939	0.28649	1.33947	0.804692	0.356024	0.209082	1.57583e-97	1.37956e-92
FBgn0031494	CG17219	0.286433	0.99163	0.715916	0.400092	0.222505	4.64805e-104	4.06913e-99
FBgn0037624	CG8223	0.286422	3.34251	0.957514	0.299131	0.234492	6.19817e-110	5.42618e-105
FBgn0015218	eIF4E1	0.286412	10.5547	0.999366	0.286593	0.241341	2.61274e-113	2.28732e-108
FBgn0052190	NUCB1	0.286364	4.02555	0.990488	0.289114	0.270509	7.75526e-128	6.78934e-123
FBgn0085220	Ufm1	0.286335	2.67903	0.961953	0.29766	0.211913	6.6735e-99	5.84232e-94
FBgn0031663	CG8891	0.286218	2.27432	0.925174	0.309367	0.206992	1.62168e-96	1.4197e-91
FBgn0040931	CG9034	0.286201	4.60113	0.994927	0.28766	0.213562	1.05603e-99	9.245e-95
FBgn0029529	CG13365	0.286156	2.19337	0.929613	0.307822	0.210779	2.3697e-98	2.07456e-93
FBgn0033663	ERp60	0.286138	4.73659	0.994927	0.287597	0.252519	7.58106e-119	6.63684e-114
FBgn0032149	CG4036	0.28605	1.31384	0.828155	0.345407	0.259077	4.10609e-122	3.59468e-117
FBgn0038426	mRpS33	0.285965	3.71236	0.987952	0.289453	0.227119	2.57406e-106	2.25346e-101
FBgn0034245	UQCR-6.4	0.285905	14.7745	1	0.285905	0.254905	4.93078e-120	4.31665e-115
FBgn0052803	CG32803	0.285818	1.69148	0.887762	0.321953	0.233827	1.3161e-109	1.15218e-104
FBgn0020235	ATPsyngamma	0.285629	8.87535	1	0.285629	0.246496	7.37585e-116	6.45719e-111
FBgn0039305	CG11858	0.28547	1.81039	0.887127	0.321791	0.200593	2.00148e-93	1.7522e-88
FBgn0028342	ATPsyndelta	0.285469	10.0074	1	0.285469	0.2367	5.07635e-111	4.44409e-106
FBgn0250837	dUTPase	0.285436	13.9195	1	0.285436	0.255081	4.03063e-120	3.52861e-115
FBgn0035524	CG11583	0.285427	3.10877	0.968294	0.294773	0.217643	1.09197e-101	9.55969e-97
FBgn0035424	Larp4B	0.285309	1.39515	0.817375	0.349055	0.27362	2.11423e-129	1.85091e-124
FBgn0029888	ND-ASHI	0.285064	3.96314	0.991122	0.287618	0.220968	2.61426e-103	2.28866e-98
FBgn0033317	CG8635	0.284933	2.82949	0.963855	0.295618	0.213726	8.78262e-100	7.68874e-95
FBgn0035805	CG7506	0.284864	1.6212	0.861763	0.330559	0.208357	3.53656e-97	3.09608e-92
FBgn0038271	UQCR-C1	0.284683	7.2589	1	0.284683	0.250492	7.70313e-118	6.74371e-113
FBgn0052243	CG32243	0.284627	1.0865	0.727964	0.390991	0.216826	2.7301e-101	2.39007e-96
FBgn0010314	Cks30A	0.284519	2.27311	0.930247	0.305853	0.234985	3.54665e-110	3.10491e-105
FBgn0266421	RPA3	0.284506	6.75694	0.998732	0.284867	0.246191	1.04448e-115	9.14387e-111
FBgn0031601	Dim1	0.284414	1.8917	0.891566	0.319004	0.210456	3.39924e-98	2.97587e-93
FBgn0033486	dmpd	0.284361	1.52193	0.851617	0.333907	0.253059	4.08204e-119	3.57363e-114
FBgn0061515	endos	0.284352	8.26558	1	0.284352	0.259969	1.47274e-122	1.28931e-117
FBgn0040529	COX7A	0.284293	12.1751	1	0.284293	0.260535	7.68205e-123	6.72525e-118
FBgn0034645	ND-B12	0.284239	6.28253	0.998732	0.2846	0.226606	4.5888e-106	4.01727e-101
FBgn0016691	ATPsynO	0.284027	10.9957	1	0.284027	0.232896	3.77312e-109	3.30318e-104
FBgn0045866	bai	0.283887	6.29623	0.998098	0.284428	0.23245	6.2511e-109	5.47253e-104
FBgn0037313	CG1161	0.283813	3.49859	0.980342	0.289504	0.231767	1.35319e-108	1.18465e-103
FBgn0032390	dgt2	0.283586	2.18045	0.938491	0.302173	0.250407	8.48701e-118	7.42996e-113
FBgn0004908	Arl2	0.283455	1.80172	0.890298	0.318382	0.249755	1.78772e-117	1.56506e-112
FBgn0026090	CG14812	0.28326	2.60899	0.953075	0.297206	0.237211	2.84626e-111	2.49175e-106
FBgn0028411	Nxt1	0.283157	8.57643	0.999366	0.283336	0.225476	1.63954e-105	1.43533e-100
FBgn0036580	PDCD-5	0.282958	5.01097	0.989854	0.285858	0.198819	1.4345e-92	1.25584e-87
FBgn0026415	Idgf4	0.282939	3.26537	0.972733	0.29087	0.255551	2.35108e-120	2.05826e-115
FBgn0015778	rin	0.2829	14.0496	1	0.2829	0.27767	1.92479e-131	1.68506e-126
FBgn0052626	AMPdeam	0.282881	2.23278	0.914394	0.309364	0.230035	9.58879e-108	8.3945e-103
FBgn0023522	CG11596	0.282864	1.9515	0.923272	0.306371	0.224675	4.04091e-105	3.53761e-100
FBgn0026316	Ubc10	0.282749	2.16489	0.93215	0.30333	0.233133	2.88778e-109	2.52811e-104
FBgn0038673	CG14286	0.282634	1.58291	0.855422	0.330404	0.186564	1.0979e-86	9.61153e-82
FBgn0004395	unk	0.28256	1.64793	0.826886	0.341716	0.296502	5.34106e-141	4.67583e-136
FBgn0284255	Arpc4	0.282367	4.08225	0.991122	0.284897	0.223754	1.13967e-104	9.97726e-100
FBgn0025608	Faf2	0.282228	2.83038	0.960685	0.293778	0.226656	4.33723e-106	3.79702e-101
FBgn0028689	Rpn6	0.282217	5.95	0.996829	0.283115	0.230184	8.09668e-108	7.08824e-103
FBgn0001091	Gapdh1	0.282212	4.47334	0.972099	0.290312	0.248953	4.46963e-117	3.91294e-112
FBgn0027868	Nup107	0.282029	1.60204	0.868738	0.324642	0.199948	4.0959e-93	3.58575e-88
FBgn0017578	Max	0.281956	2.67824	0.951173	0.29643	0.232416	6.49585e-109	5.6868e-104
FBgn0260008	UQCR-11	0.281947	20.8871	1	0.281947	0.241727	1.68575e-113	1.47579e-108
FBgn0039737	CG7920	0.281783	1.50987	0.846544	0.332862	0.197759	4.64834e-92	4.06939e-87
FBgn0030630	CG12608	0.281719	2.36615	0.944198	0.298369	0.225933	9.80225e-106	8.58138e-101
FBgn0030480	Tim9a	0.28165	7.38991	0.999366	0.281829	0.216714	3.09421e-101	2.70882e-96
FBgn0035534	mRpS6	0.281617	1.83307	0.906151	0.310784	0.214293	4.66126e-100	4.0807e-95
FBgn0086656	shrb	0.281541	3.05975	0.974001	0.289057	0.231106	2.85908e-108	2.50298e-103
FBgn0031505	ND-B14.5B	0.281504	4.64106	0.995561	0.282759	0.230565	5.26881e-108	4.61258e-103
FBgn0035811	Mcad	0.281494	2.54833	0.949271	0.296538	0.224198	6.91866e-105	6.05694e-100
FBgn0052441	CG32441	0.281486	4.01777	0.993025	0.283463	0.233331	2.30712e-109	2.01976e-104
FBgn0039711	CG7824	0.2814	0.997219	0.72733	0.386894	0.200682	1.81304e-93	1.58723e-88
FBgn0033485	RpLP0-like	0.281313	3.76839	0.976538	0.288072	0.209678	8.09897e-98	7.09024e-93
FBgn0004363	porin	0.281276	20.4416	1	0.281276	0.292402	6.57179e-139	5.75328e-134
FBgn0027081	ThrRS	0.281217	2.0319	0.906151	0.310342	0.198701	1.6341e-92	1.43058e-87
FBgn0083953	CG34117	0.281177	3.31241	0.973367	0.28887	0.241989	1.25029e-113	1.09457e-108
FBgn0027496	epsilonCOP	0.281172	2.21503	0.91059	0.30878	0.199672	5.56693e-93	4.87357e-88
FBgn0011818	oaf	0.281166	1.31392	0.801522	0.35079	0.254326	9.56538e-120	8.37401e-115
FBgn0035181	CG9205	0.281116	2.64565	0.963855	0.291657	0.251547	2.30397e-118	2.01701e-113
FBgn0034066	CG8397	0.28109	4.06837	0.990488	0.28379	0.254904	4.93462e-120	4.32001e-115
FBgn0038474	mRpS11	0.281016	1.7329	0.879518	0.319512	0.188784	9.49795e-88	8.31498e-83
FBgn0266124	ghi	0.280804	3.96997	0.989854	0.283682	0.232729	4.55989e-109	3.99196e-104
FBgn0033480	mRpL42	0.280593	3.56041	0.980342	0.28622	0.247526	2.27913e-116	1.99527e-111
FBgn0033886	Rpn13	0.280579	2.97306	0.970831	0.28901	0.241319	2.67951e-113	2.34578e-108
FBgn0051126	CG31126	0.28051	1.83186	0.909956	0.308268	0.213854	7.61351e-100	6.66525e-95
FBgn0019644	ATPsynB	0.280291	7.37843	0.998732	0.280647	0.203488	8.01552e-95	7.01719e-90
FBgn0015221	Fer2LCH	0.280182	10.4111	0.999366	0.28036	0.240378	7.81085e-113	6.83801e-108
FBgn0015790	Rab11	0.280155	3.13321	0.96449	0.29047	0.211643	9.02079e-99	7.89725e-94
FBgn0052267	CG32267	0.280003	6.38387	0.995561	0.281251	0.227651	1.41337e-106	1.23733e-101
FBgn0051549	CG31549	0.279751	1.87788	0.883957	0.316476	0.211767	7.85468e-99	6.87638e-94
FBgn0262116	RNASEK	0.279702	20.421	1	0.279702	0.228103	8.48572e-107	7.42882e-102
FBgn0025678	CaBP1	0.279588	4.19496	0.991122	0.282093	0.238636	5.65001e-112	4.9463e-107
FBgn0010621	CCT5	0.279407	4.07719	0.982245	0.284458	0.200116	3.4015e-93	2.97784e-88
FBgn0053107	CG33107	0.279333	1.14094	0.766011	0.36466	0.222834	3.21125e-104	2.81129e-99
FBgn0040907	mRpL33	0.279139	4.30362	0.992391	0.28128	0.217843	8.73355e-102	7.64579e-97
FBgn0086768	Pcmt	0.27907	2.17516	0.937223	0.297763	0.23417	8.92715e-110	7.81527e-105
FBgn0026196	nop5	0.279013	7.51653	0.998732	0.279367	0.181343	3.42914e-84	3.00204e-79
FBgn0032620	CG12288	0.27897	2.17118	0.904883	0.308294	0.194519	1.68294e-90	1.47333e-85
FBgn0039258	beta4GalT7	0.278853	1.11133	0.760304	0.366765	0.210835	2.22601e-98	1.94876e-93
FBgn0033548	CG7637	0.278756	8.55028	0.998098	0.279287	0.187767	2.91792e-87	2.55449e-82
FBgn0022029	l(2)k01209	0.278729	1.07034	0.726062	0.383892	0.218112	6.45612e-102	5.65201e-97
FBgn0035830	CG8209	0.278709	2.27227	0.949271	0.293603	0.224263	6.42918e-105	5.62843e-100
FBgn0085468	ND-MWFE	0.278563	7.86964	0.998732	0.278917	0.199331	8.1248e-93	7.11286e-88
FBgn0036035	CG18178	0.278509	2.20796	0.916931	0.30374	0.198188	2.88882e-92	2.52902e-87
FBgn0002022	Catsup	0.278368	1.40122	0.833862	0.333829	0.213203	1.57719e-99	1.38075e-94
FBgn0022224	ubl	0.278143	4.43171	0.995561	0.279383	0.220537	4.24506e-103	3.71633e-98
FBgn0250838	roh	0.278096	14.9325	1	0.278096	0.223733	1.16784e-104	1.02239e-99
FBgn0039930	CG11077	0.278087	1.33863	0.812936	0.342077	0.192194	2.19965e-89	1.92568e-84
FBgn0051125	CG31125	0.277985	0.926137	0.699429	0.397445	0.230967	3.34521e-108	2.92856e-103
FBgn0034098	krimp	0.277955	1.522	0.842105	0.330072	0.207886	5.98082e-97	5.23591e-92
FBgn0028691	Rpn9	0.277786	4.49702	0.989854	0.280633	0.220368	5.1298e-103	4.49089e-98
FBgn0040623	Spase12	0.277662	4.38276	0.992391	0.279792	0.218124	6.36929e-102	5.576e-97
FBgn0026324	Taf10b	0.277643	4.10495	0.987952	0.281029	0.233808	1.34568e-109	1.17808e-104
FBgn0034264	Dlish	0.277384	1.10893	0.742549	0.373556	0.237357	2.41123e-111	2.11091e-106
FBgn0039765	mRpS18C	0.277253	2.28725	0.941027	0.294627	0.223793	1.09142e-104	9.55481e-100
FBgn0030366	Usp7	0.277163	6.52448	0.994927	0.278576	0.217479	1.3135e-101	1.14991e-96
FBgn0034753	CG2852	0.276773	36.3144	1	0.276773	0.27586	1.57384e-130	1.37782e-125
FBgn0261396	Rpn3	0.276759	2.8741	0.939759	0.2945	0.204854	1.75432e-95	1.53582e-90
FBgn0037376	Hat1	0.276742	2.40018	0.932784	0.296684	0.198382	2.32991e-92	2.03972e-87
FBgn0028398	Taf10	0.276737	3.99319	0.98922	0.279753	0.211078	1.69593e-98	1.4847e-93
FBgn0030874	Spt7	0.276676	1.50695	0.844642	0.327566	0.220461	4.62341e-103	4.04756e-98
FBgn0054031	CG34031	0.276539	0.741606	0.578313	0.478181	0.231411	2.025e-108	1.77279e-103
FBgn0262512	Vha14-1	0.276464	5.05058	0.994293	0.27805	0.219297	1.70763e-102	1.49495e-97
FBgn0010226	GstS1	0.27638	2.74318	0.947368	0.291734	0.214331	4.46546e-100	3.90929e-95
FBgn0026575	hang	0.276349	2.06943	0.901078	0.306687	0.199917	4.23962e-93	3.71157e-88
FBgn0040754	CG17059	0.276349	2.54365	0.948637	0.291312	0.199917	4.24298e-93	3.71452e-88
FBgn0037898	Dtd	0.27623	0.76217	0.622067	0.444052	0.182235	1.28595e-84	1.12579e-79
FBgn0027329	CCT6	0.276178	3.63624	0.973367	0.283734	0.186863	7.90168e-87	6.91752e-82
FBgn0032815	CG10462	0.276078	1.18744	0.780596	0.353676	0.21607	6.36935e-101	5.57605e-96
FBgn0038080	CG12279	0.275914	1.18079	0.774255	0.356361	0.202924	1.50139e-94	1.31439e-89
FBgn0035228	CG12091	0.275912	2.72399	0.958782	0.287773	0.221913	9.04205e-104	7.91586e-99
FBgn0031049	Sec61gamma	0.275833	18.1996	1	0.275833	0.222482	4.76866e-104	4.17472e-99
FBgn0286784	TER94	0.275831	4.40997	0.994927	0.277238	0.235019	3.41275e-110	2.98769e-105
FBgn0033529	CG17765	0.275682	3.43855	0.981611	0.280846	0.21348	1.15689e-99	1.0128e-94
FBgn0030584	CG14407	0.275671	2.74756	0.959417	0.287332	0.203457	8.3029e-95	7.26878e-90
FBgn0031418	CG3609	0.2756	1.29994	0.790742	0.348533	0.189852	2.92345e-88	2.55934e-83
FBgn0034282	Mapmodulin	0.275512	15.9267	1	0.275512	0.237256	2.70325e-111	2.36656e-106
FBgn0260857	Bet1	0.2755	1.83077	0.894103	0.30813	0.264573	7.35799e-125	6.44155e-120
FBgn0033929	Tfb1	0.275476	1.86684	0.916297	0.30064	0.240635	5.83199e-113	5.10561e-108
FBgn0021906	RFeSP	0.27545	9.57028	1	0.27545	0.204846	1.77016e-95	1.54968e-90
FBgn0001280	janA	0.275403	8.21025	0.999366	0.275578	0.197551	5.8535e-92	5.12444e-87
FBgn0036180	Duba	0.275389	1.34201	0.810399	0.339818	0.207268	1.19105e-96	1.0427e-91
FBgn0266019	rudhira	0.27535	3.37842	0.959417	0.286998	0.246343	8.78218e-116	7.68836e-111
FBgn0261403	sxc	0.275334	3.33903	0.982245	0.280311	0.23534	2.37314e-110	2.07757e-105
FBgn0052708	CG32708	0.275291	1.5974	0.838301	0.328392	0.198899	1.31197e-92	1.14856e-87
FBgn0000150	awd	0.275264	47.6999	1	0.275264	0.219258	1.7846e-102	1.56233e-97
FBgn0010213	Sod2	0.275256	3.46141	0.974001	0.282603	0.199804	4.80581e-93	4.20725e-88
FBgn0037356	CG12170	0.275189	0.934427	0.693722	0.396685	0.221009	2.49757e-103	2.1865e-98
FBgn0000173	ben	0.27508	7.44719	0.999366	0.275255	0.241404	2.43258e-113	2.1296e-108
FBgn0051360	CG31360	0.274915	1.19744	0.782498	0.35133	0.209601	8.8331e-98	7.73293e-93
FBgn0038012	CG10013	0.274904	0.533694	0.490171	0.560832	0.229229	2.38048e-107	2.08399e-102
FBgn0031403	CG15387	0.274884	2.753	0.967026	0.284257	0.23976	1.57615e-112	1.37984e-107
FBgn0264816	koko	0.274645	2.4084	0.942295	0.291463	0.192796	1.13128e-89	9.90382e-85
FBgn0033907	mRpS16	0.274571	2.28817	0.938491	0.292567	0.218748	3.16322e-102	2.76924e-97
FBgn0034523	Nnf1a	0.274435	2.21936	0.923906	0.297038	0.281247	3.0034e-133	2.62932e-128
FBgn0000246	c(3)G	0.274377	0.901618	0.670894	0.408973	0.194003	2.97577e-90	2.60514e-85
FBgn0025592	Gk1	0.274178	1.01321	0.733037	0.37403	0.229143	2.62464e-107	2.29775e-102
FBgn0027504	CG8878	0.274163	2.13484	0.923272	0.296947	0.227014	2.89788e-106	2.53695e-101
FBgn0014391	sun	0.274132	8.93455	0.999366	0.274306	0.191993	2.74843e-89	2.40611e-84
FBgn0013746	alien	0.274096	2.76057	0.959417	0.285691	0.233697	1.52449e-109	1.33461e-104
FBgn0029687	Vap33	0.274079	11.8971	1	0.274079	0.234906	3.88024e-110	3.39696e-105
FBgn0031764	CG9107	0.273995	2.61164	0.95371	0.287294	0.212687	2.8089e-99	2.45905e-94
FBgn0013763	Idgf6	0.27396	3.83793	0.984781	0.278194	0.221741	1.09656e-103	9.59987e-99
FBgn0010520	Bka	0.273915	1.97936	0.904249	0.30292	0.210589	2.93029e-98	2.56533e-93
FBgn0024491	Bin1	0.273879	5.63718	0.996195	0.274925	0.235844	1.33971e-110	1.17285e-105
FBgn0036691	beg	0.273771	1.28712	0.798985	0.342649	0.180908	5.5301e-84	4.84132e-79
FBgn0033272	RagC-D	0.273653	1.06464	0.75967	0.360226	0.228644	4.60685e-107	4.03307e-102
FBgn0039130	CG5854	0.273568	1.41942	0.823716	0.332114	0.191575	4.35996e-89	3.81692e-84
FBgn0001491	l(1)10Bb	0.273554	3.07341	0.970831	0.281773	0.214032	6.23961e-100	5.46247e-95
FBgn0037372	CG2091	0.273504	2.70213	0.951807	0.287353	0.224734	3.7847e-105	3.31332e-100
FBgn0003676	CCT1	0.27337	2.1744	0.926443	0.295075	0.197589	5.61069e-92	4.91188e-87
FBgn0037102	CRIF	0.273289	2.1726	0.925808	0.29519	0.17498	3.67371e-81	3.21615e-76
FBgn0036515	AIMP2	0.273273	1.95462	0.906785	0.301365	0.193228	7.01566e-90	6.14186e-85
FBgn0030061	CG1785	0.273156	1.7853	0.874445	0.312377	0.18744	4.18111e-87	3.66035e-82
FBgn0030792	CG4789	0.273156	1.3	0.783133	0.348799	0.191172	6.80427e-89	5.95679e-84
FBgn0035688	fmt	0.272985	1.23705	0.787571	0.346616	0.259694	2.02174e-122	1.76994e-117
FBgn0083961	CG34125	0.272964	1.95294	0.894103	0.305293	0.182283	1.22038e-84	1.06838e-79
FBgn0261020	wol	0.272898	1.9332	0.917565	0.297415	0.222435	5.02607e-104	4.40007e-99
FBgn0031670	SelT	0.272776	6.17091	0.999366	0.272949	0.206045	4.65614e-96	4.07621e-91
FBgn0038275	CG3817	0.272719	2.25085	0.934052	0.291974	0.20064	1.90001e-93	1.66337e-88
FBgn0033100	CG3420	0.272598	2.06709	0.931516	0.292639	0.202409	2.66216e-94	2.33059e-89
FBgn0024814	Clc	0.272559	5.2918	0.995561	0.273774	0.210907	2.0542e-98	1.79835e-93
FBgn0040389	mRpL14	0.272549	2.60758	0.941027	0.289629	0.19378	3.81113e-90	3.33645e-85
FBgn0032101	CG9586	0.272539	2.50311	0.944832	0.288452	0.18374	2.45903e-85	2.15276e-80
FBgn0030433	mRpL49	0.272448	2.31516	0.928345	0.293477	0.170402	5.48062e-79	4.79801e-74
FBgn0031768	CG12393	0.272423	1.40293	0.843373	0.323016	0.198881	1.33941e-92	1.17259e-87
FBgn0000711	flw	0.272383	4.09206	0.979708	0.278024	0.204858	1.74657e-95	1.52904e-90
FBgn0033901	O-fut1	0.272257	1.37333	0.831959	0.327248	0.234415	6.76482e-110	5.92226e-105
FBgn0037255	Fip1	0.272131	3.37889	0.982879	0.276871	0.218493	4.21173e-102	3.68716e-97
FBgn0039189	CG18528	0.272085	0.950443	0.688015	0.395464	0.220725	3.43619e-103	3.00822e-98
FBgn0038924	CG6028	0.272059	1.73724	0.887762	0.306455	0.194373	1.97641e-90	1.73025e-85
FBgn0036811	MED11	0.271939	2.50263	0.95371	0.285139	0.187725	3.05356e-87	2.67324e-82
FBgn0261373	CG33228	0.271927	0.848745	0.656944	0.413928	0.235944	1.19614e-110	1.04716e-105
FBgn0028695	Rpn1	0.271909	1.99716	0.911858	0.298192	0.204931	1.61021e-95	1.40966e-90
FBgn0037529	mRpS9	0.271896	2.1235	0.927711	0.293083	0.194118	2.62183e-90	2.29528e-85
FBgn0038805	TFAM	0.271847	2.60029	0.961319	0.282785	0.200124	3.36989e-93	2.95017e-88
FBgn0037566	mRpL1	0.271755	2.30458	0.941661	0.288591	0.183596	2.87984e-85	2.52116e-80
FBgn0039509	bigmax	0.271721	1.33209	0.822448	0.33038	0.220086	7.04232e-103	6.1652e-98
FBgn0029868	ND-B16.6	0.271712	6.56243	0.996829	0.272577	0.186196	1.64617e-86	1.44114e-81
FBgn0010247	Parp	0.271673	2.06303	0.897907	0.302562	0.190304	1.77602e-88	1.55482e-83
FBgn0030263	CG2076	0.271671	1.37087	0.821814	0.330575	0.196802	1.34235e-91	1.17516e-86
FBgn0028685	Rpt4	0.27158	4.53559	0.985415	0.275599	0.210274	4.16308e-98	3.64457e-93
FBgn0016983	smid	0.271521	1.66195	0.877616	0.309385	0.208639	2.58261e-97	2.26095e-92
FBgn0035337	CG15877	0.271488	1.4872	0.845276	0.321183	0.201952	4.42638e-94	3.87508e-89
FBgn0038811	Pus1	0.271476	1.10067	0.753963	0.360065	0.215612	1.06354e-100	9.31075e-96
FBgn0034576	ND-B14.7	0.271263	2.03703	0.920101	0.294819	0.192733	1.21345e-89	1.06232e-84
FBgn0020497	emb	0.271014	5.66808	0.995561	0.272222	0.211229	1.43358e-98	1.25503e-93
FBgn0000147	aurA	0.270895	1.49887	0.835764	0.324129	0.217203	1.78975e-101	1.56683e-96
FBgn0001104	Galphai	0.270809	11.8102	0.999366	0.270981	0.221135	2.16751e-103	1.89755e-98
FBgn0016119	ATPsynCF6	0.270698	11.6466	0.999366	0.27087	0.192661	1.31332e-89	1.14974e-84
FBgn0050499	Rpe	0.270683	3.94486	0.987318	0.27416	0.194568	1.59385e-90	1.39534e-85
FBgn0030321	CG1703	0.270658	2.40272	0.932784	0.290162	0.184938	6.58159e-86	5.76185e-81
FBgn0028686	Rpt3	0.270629	5.14257	0.992391	0.272704	0.19404	2.85849e-90	2.50246e-85
FBgn0028700	RfC38	0.270511	2.08235	0.890298	0.303843	0.177958	1.40711e-82	1.23185e-77
FBgn0036804	Sgf11	0.270461	1.67131	0.871909	0.310194	0.202988	1.39909e-94	1.22483e-89
FBgn0013770	Cp1	0.270438	4.29909	0.988586	0.27356	0.198662	1.70715e-92	1.49452e-87
FBgn0283499	InR	0.270423	2.47441	0.937857	0.288341	0.283298	2.75109e-134	2.40844e-129
FBgn0038013	CG10038	0.270407	1.28426	0.807863	0.334719	0.191137	7.07934e-89	6.1976e-84
FBgn0037543	CG10903	0.270336	1.37803	0.842105	0.321024	0.193564	4.83999e-90	4.23717e-85
FBgn0031830	COX5B	0.2703	14.5736	1	0.2703	0.213627	9.82208e-100	8.59874e-95
FBgn0032200	CG5676	0.270155	7.89066	0.999366	0.270326	0.239124	3.24653e-112	2.84217e-107
FBgn0027054	CSN4	0.270127	1.81599	0.904249	0.298731	0.22045	4.67786e-103	4.09523e-98
FBgn0033421	CG1888	0.270066	1.81235	0.885225	0.305082	0.230434	6.10348e-108	5.34329e-103
FBgn0001225	Hsp26	0.269982	51.313	1	0.269982	0.205932	5.28304e-96	4.62504e-91
FBgn0058002	ND-AGGG	0.269933	2.86772	0.95688	0.282096	0.174086	9.77625e-81	8.55862e-76
FBgn0017567	ND-23	0.269924	2.03817	0.91059	0.296428	0.200689	1.80057e-93	1.57631e-88
FBgn0266711	EloC	0.269834	7.28132	1	0.269834	0.188928	8.10615e-88	7.09652e-83
FBgn0053977	CG33977	0.269775	1.20646	0.771718	0.349577	0.211339	1.26817e-98	1.11022e-93
FBgn0031885	Mnn1	0.269748	3.62397	0.975904	0.276409	0.220005	7.70979e-103	6.74954e-98
FBgn0263510	nclb	0.269725	1.82523	0.88903	0.303393	0.210358	3.79086e-98	3.31871e-93
FBgn0040751	CG13018	0.26965	1.65925	0.862397	0.312675	0.208085	4.79052e-97	4.19386e-92
FBgn0286222	Fum1	0.269618	2.38416	0.929613	0.290032	0.195216	7.78061e-91	6.81154e-86
FBgn0266666	Sem1	0.269472	9.93977	1	0.269472	0.20664	2.39962e-96	2.10074e-91
FBgn0037391	CG2017	0.26937	0.781041	0.615092	0.437935	0.200818	1.55908e-93	1.3649e-88
FBgn0036487	Prp31	0.269284	1.77278	0.898542	0.29969	0.21322	1.54724e-99	1.35453e-94
FBgn0027334	l(1)G0004	0.269059	2.64205	0.931516	0.28884	0.188757	9.78991e-88	8.57058e-83
FBgn0033029	Not3	0.268801	1.86557	0.911224	0.294989	0.234013	1.06654e-109	9.33699e-105
FBgn0033608	CG13220	0.268791	3.00438	0.959417	0.280161	0.191225	6.4224e-89	5.62249e-84
FBgn0003714	tko	0.268758	3.01942	0.967026	0.277922	0.186164	1.7052e-86	1.49282e-81
FBgn0032476	CG5439	0.268737	1.65037	0.868738	0.309342	0.194133	2.57985e-90	2.25853e-85
FBgn0039969	Fis1	0.268686	4.22316	0.986684	0.272312	0.180019	1.46671e-83	1.28403e-78
FBgn0052250	PMP34	0.268639	1.52669	0.844008	0.318289	0.23308	3.06478e-109	2.68306e-104
FBgn0025800	Smox	0.268617	1.6615	0.869372	0.308978	0.204657	2.18487e-95	1.91274e-90
FBgn0033191	CG1598	0.268576	1.25571	0.788205	0.340744	0.23692	3.95744e-111	3.46454e-106
FBgn0263987	spoon	0.268553	3.18802	0.962587	0.27899	0.188575	1.19586e-87	1.04691e-82
FBgn0026380	Prosbeta3	0.2685	8.37809	0.996829	0.269354	0.203821	5.53916e-95	4.84926e-90
FBgn0020545	kraken	0.268419	1.75193	0.87825	0.305629	0.185861	2.38187e-86	2.08521e-81
FBgn0051950	Sbat	0.268284	1.46745	0.828155	0.323954	0.19676	1.40715e-91	1.23189e-86
FBgn0033209	CG12107	0.268227	1.92047	0.908053	0.295387	0.212373	3.99287e-99	3.49556e-94
FBgn0037881	GCC88	0.267897	1.36407	0.823716	0.32523	0.202608	2.13385e-94	1.86808e-89
FBgn0051390	MED7	0.26788	2.62801	0.954978	0.280509	0.215446	1.28189e-100	1.12223e-95
FBgn0264694	mgr	0.267791	2.08172	0.908053	0.294907	0.213609	1.00142e-99	8.7669e-95
FBgn0031040	CG14210	0.267723	3.48264	0.968294	0.276489	0.179487	2.62997e-83	2.30241e-78
FBgn0039381	SppL	0.26742	1.95553	0.915663	0.292051	0.229041	2.94302e-107	2.57646e-102
FBgn0029506	Tsp42Ee	0.267331	4.40172	0.991122	0.269725	0.287874	1.31772e-136	1.1536e-131
FBgn0050001	CG30001	0.267325	0.830533	0.677869	0.39436	0.189162	6.26153e-88	5.48166e-83
FBgn0026261	bonsai	0.267268	1.6992	0.878884	0.304099	0.179838	1.78926e-83	1.56641e-78
FBgn0004926	eIF2beta	0.267161	9.66779	1	0.267161	0.209524	9.62469e-98	8.42593e-93
FBgn0086532	Spt-I	0.267142	1.55775	0.865568	0.308632	0.226498	5.18317e-106	4.53761e-101
FBgn0034877	levy	0.267125	11.9795	1	0.267125	0.186961	7.08808e-87	6.20526e-82
FBgn0003074	Pgi	0.267113	1.09735	0.757134	0.352795	0.209221	1.34993e-97	1.18179e-92
FBgn0015268	Nap1	0.267054	11.3082	1	0.267054	0.184184	1.50841e-85	1.32054e-80
FBgn0035088	CG3776	0.266891	2.69616	0.965758	0.276354	0.218558	3.91471e-102	3.42713e-97
FBgn0039250	Mink	0.266863	1.63792	0.854153	0.31243	0.220881	2.8834e-103	2.52427e-98
FBgn0038746	Surf6	0.266837	3.36829	0.967026	0.275935	0.164526	3.31688e-76	2.90376e-71
FBgn0036193	CG14135	0.266735	1.04095	0.73494	0.362935	0.195625	4.94439e-91	4.32857e-86
FBgn0032292	EMC3	0.266719	3.7913	0.984147	0.271015	0.192776	1.15608e-89	1.01209e-84
FBgn0032329	Art8	0.266677	0.890212	0.683576	0.390121	0.200198	3.10593e-93	2.71908e-88
FBgn0038876	Idi	0.266677	1.43157	0.854153	0.312211	0.200277	2.84501e-93	2.49067e-88
FBgn0261791	SNRPG	0.266557	12.7459	1	0.266557	0.211391	1.19627e-98	1.04727e-93
FBgn0027492	wdb	0.266528	3.04015	0.96766	0.275435	0.200999	1.27509e-93	1.11628e-88
FBgn0037360	CG2182	0.266518	3.01591	0.967026	0.275606	0.205088	1.35214e-95	1.18373e-90
FBgn0250746	Prosbeta7	0.266377	4.55466	0.990488	0.268935	0.225317	1.96147e-105	1.71716e-100
FBgn0026418	Hsc70Cb	0.266362	4.9315	0.986684	0.269957	0.202384	2.73688e-94	2.396e-89
FBgn0027087	HisRS	0.266343	1.38708	0.823716	0.323343	0.198533	1.96927e-92	1.724e-87
FBgn0026149	BCL7-like	0.266177	2.20606	0.93532	0.284584	0.237112	3.18328e-111	2.7868e-106
FBgn0035727	CG10063	0.266139	0.593401	0.452124	0.588642	0.203859	5.30855e-95	4.64737e-90
FBgn0264491	how	0.266045	2.53783	0.938491	0.283482	0.19177	3.51788e-89	3.07973e-84
FBgn0031285	CG3662	0.265944	2.89747	0.951173	0.279596	0.192203	2.17825e-89	1.90695e-84
FBgn0037728	p23	0.265879	35.5302	1	0.265879	0.213225	1.53859e-99	1.34696e-94
FBgn0051715	CG31715	0.265873	3.11203	0.974001	0.272969	0.239753	1.58862e-112	1.39076e-107
FBgn0034403	CG18190	0.26586	1.20744	0.776157	0.342534	0.203731	6.11985e-95	5.35763e-90
FBgn0036927	Gabat	0.265619	2.35215	0.925174	0.287102	0.186435	1.26536e-86	1.10776e-81
FBgn0030669	CG9240	0.265541	2.23345	0.938491	0.282945	0.182489	9.73313e-85	8.52087e-80
FBgn0030057	Ppt1	0.265498	1.22408	0.778694	0.340953	0.201471	7.54728e-94	6.60727e-89
FBgn0086361	alph	0.265332	2.63372	0.965758	0.274739	0.221698	1.15068e-103	1.00736e-98
FBgn0033571	Rpb5	0.265236	3.18931	0.957514	0.277005	0.181108	4.43777e-84	3.88505e-79
FBgn0033247	Nup44A	0.265076	2.05962	0.906785	0.292325	0.214863	2.46264e-100	2.15592e-95
FBgn0021795	Tapdelta	0.264997	6.47843	0.998098	0.265502	0.235981	1.14802e-110	1.00503e-105
FBgn0025382	Rab27	0.264967	0.622491	0.545973	0.485311	0.209747	7.50201e-98	6.56764e-93
FBgn0036136	Ufd1-like	0.264945	1.61031	0.870006	0.304533	0.209203	1.37684e-97	1.20536e-92
FBgn0033570	ND-B14	0.264908	4.39944	0.992391	0.266939	0.178819	5.47716e-83	4.79498e-78
FBgn0028694	Rpn11	0.264885	2.63469	0.950539	0.278669	0.226685	4.19758e-106	3.67478e-101
FBgn0040290	RecQ4	0.264878	0.966919	0.700063	0.378363	0.180846	5.91708e-84	5.18011e-79
FBgn0033341	MrgBP	0.264868	2.47193	0.951173	0.278464	0.211708	8.39295e-99	7.34761e-94
FBgn0027084	LysRS	0.26484	1.94883	0.892834	0.296629	0.164166	4.90676e-76	4.29562e-71
FBgn0023545	PIG-K	0.264762	1.25736	0.785035	0.337262	0.176885	4.56185e-82	3.99367e-77
FBgn0030551	CG11674	0.264676	3.19279	0.952441	0.277892	0.20554	8.17004e-96	7.15246e-91
FBgn0023514	CG14805	0.264633	1.76989	0.882689	0.299804	0.169702	1.17659e-78	1.03004e-73
FBgn0033340	CG13751	0.264591	3.81755	0.991122	0.266961	0.183989	1.86955e-85	1.6367e-80
FBgn0037608	mRpL19	0.264537	2.73011	0.960685	0.275363	0.185564	3.30337e-86	2.89193e-81
FBgn0259937	Nop60B	0.264433	10.668	1	0.264433	0.159884	5.14941e-74	4.50805e-69
FBgn0037282	CG14657	0.264365	1.28772	0.812936	0.325198	0.227513	1.65079e-106	1.44519e-101
FBgn0038903	RpI12	0.264312	1.06767	0.730501	0.361823	0.222735	3.58656e-104	3.13985e-99
FBgn0011692	pav	0.264224	2.04702	0.896005	0.294892	0.188926	8.12328e-88	7.11152e-83
FBgn0025815	Mcm6	0.26418	2.23751	0.930881	0.283795	0.198535	1.96599e-92	1.72113e-87
FBgn0039735	Nph	0.264077	16.4741	1	0.264077	0.177378	2.65934e-82	2.32812e-77
FBgn0025615	Torsin	0.264072	1.94128	0.909956	0.290204	0.177183	3.29131e-82	2.88138e-77
FBgn0037358	elm	0.264061	2.37351	0.943564	0.279854	0.189664	3.59838e-88	3.1502e-83
FBgn0038470	CG18213	0.264036	1.14554	0.772987	0.341579	0.205122	1.30182e-95	1.13968e-90
FBgn0040773	COX7C	0.263946	11.589	1	0.263946	0.156671	1.67944e-72	1.47026e-67
FBgn0053181	CG33181	0.263812	2.46412	0.916297	0.287911	0.196132	2.81875e-91	2.46767e-86
FBgn0030054	Caf1-180	0.263631	3.22897	0.957514	0.275329	0.18663	1.02118e-86	8.93989e-82
FBgn0038428	CG14894	0.26359	2.15323	0.91376	0.288468	0.198226	2.76983e-92	2.42484e-87
FBgn0033208	mRpL52	0.263336	2.36673	0.944198	0.278899	0.193503	5.17388e-90	4.52947e-85
FBgn0033754	Ak6	0.263283	1.24118	0.77806	0.338384	0.209838	6.77977e-98	5.93535e-93
FBgn0039868	CG11563	0.263208	1.56302	0.847812	0.310456	0.200273	2.85737e-93	2.50148e-88
FBgn0267727	Pen	0.263123	22.313	1	0.263123	0.183855	2.16709e-85	1.89718e-80
FBgn0002780	mod	0.263123	8.56232	0.999366	0.26329	0.159913	4.99017e-74	4.36864e-69
FBgn0034727	mRpS29	0.263121	1.76251	0.892834	0.294703	0.181849	1.96633e-84	1.72142e-79
FBgn0031868	Rat1	0.2631	1.50141	0.854153	0.308024	0.19691	1.19048e-91	1.04221e-86
FBgn0011211	blw	0.263055	10.4013	1	0.263055	0.188583	1.18551e-87	1.03786e-82
FBgn0038536	CG7655	0.262981	1.96878	0.911858	0.288402	0.205293	1.0763e-95	9.42243e-91
FBgn0033934	CG17385	0.262976	3.51643	0.983513	0.267385	0.230504	5.64078e-108	4.93822e-103
FBgn0000617	e(y)1	0.262778	2.12375	0.911224	0.288379	0.194803	1.22809e-90	1.07513e-85
FBgn0032059	PrBP	0.262745	1.63071	0.878884	0.298953	0.202995	1.38752e-94	1.21471e-89
FBgn0036922	CG14182	0.262713	1.37098	0.814204	0.322662	0.202839	1.65002e-94	1.44451e-89
FBgn0020238	14-3-3epsilon	0.262705	29.6725	1	0.262705	0.282905	4.3505e-134	3.80865e-129
FBgn0261976	Psf2	0.26263	1.07806	0.742549	0.353687	0.17499	3.63403e-81	3.18141e-76
FBgn0035169	Dci	0.26258	1.47672	0.831325	0.315857	0.192647	1.33454e-89	1.16833e-84
FBgn0028688	Rpn7	0.262564	2.55723	0.941027	0.279018	0.188177	1.85642e-87	1.6252e-82
FBgn0037890	CG17734	0.262276	4.09961	0.979708	0.267709	0.243835	1.5301e-114	1.33952e-109
FBgn0030292	CG11752	0.262058	2.94284	0.965124	0.271528	0.154017	2.97192e-71	2.60177e-66
FBgn0027786	Mtch	0.26202	1.72521	0.901078	0.290785	0.209169	1.43022e-97	1.25208e-92
FBgn0032202	REPTOR-BP	0.262018	5.00301	0.996829	0.262852	0.268322	9.72342e-127	8.51237e-122
FBgn0014023	mRpL47	0.261746	1.34683	0.833862	0.313897	0.229687	1.41952e-107	1.24272e-102
FBgn0029113	Uba2	0.261742	3.23315	0.961319	0.272274	0.185726	2.76281e-86	2.4187e-81
FBgn0033241	CG2915	0.261725	2.58653	0.954978	0.274064	0.189724	3.36661e-88	2.9473e-83
FBgn0033555	RpS15Ab	0.261705	3.09288	0.974635	0.268516	0.196513	1.84844e-91	1.61822e-86
FBgn0021856	l(2)k14505	0.26165	1.70547	0.869372	0.300964	0.167444	1.38064e-77	1.20868e-72
FBgn0031633	Fnta	0.26164	1.32915	0.818009	0.31985	0.199294	8.46993e-93	7.415e-88
FBgn0032725	Nedd8	0.261393	5.0465	0.996829	0.262224	0.200707	1.76461e-93	1.54483e-88
FBgn0011361	ND-ACP	0.261364	4.9838	0.996195	0.262362	0.181174	4.12935e-84	3.61504e-79
FBgn0031021	ND-18	0.26136	2.73746	0.96449	0.270983	0.184174	1.52594e-85	1.33589e-80
FBgn0038473	Ns1	0.261348	1.62214	0.861763	0.303272	0.164946	2.09873e-76	1.83733e-71
FBgn0030605	ND-B18	0.26131	4.38309	0.993025	0.263146	0.187206	5.41065e-87	4.73675e-82
FBgn0035063	CG3594	0.261285	1.83068	0.896639	0.291405	0.170452	5.19029e-79	4.54384e-74
FBgn0262656	Myc	0.26127	2.85874	0.925808	0.282207	0.173635	1.60193e-80	1.40241e-75
FBgn0036423	CG3919	0.261257	0.842026	0.646798	0.403924	0.203476	8.12493e-95	7.11297e-90
FBgn0035600	Cyt-c1	0.261233	4.6513	0.993025	0.263068	0.156852	1.37944e-72	1.20763e-67
FBgn0016762	angel	0.261152	0.888242	0.689918	0.378527	0.212798	2.48128e-99	2.17223e-94
FBgn0027567	CG8108	0.260933	3.11938	0.965124	0.270362	0.192434	1.68846e-89	1.47816e-84
FBgn0031436	ND-B17.2	0.260275	3.18916	0.97844	0.266011	0.191062	7.69108e-89	6.73315e-84
FBgn0032053	mRpL51	0.260249	1.57817	0.87064	0.298917	0.19093	8.89692e-89	7.78881e-84
FBgn0250754	CG42232	0.260187	1.51402	0.838935	0.310139	0.160944	1.62859e-74	1.42575e-69
FBgn0029134	Prosbeta5	0.260186	7.41746	0.997464	0.260848	0.168903	2.81256e-78	2.46226e-73
FBgn0035044	CG3663	0.26015	1.00739	0.720355	0.361142	0.19613	2.82608e-91	2.47409e-86
FBgn0000273	Pka-C1	0.260144	2.35421	0.945466	0.275149	0.203164	1.15047e-94	1.00718e-89
FBgn0034117	CG7997	0.260033	1.17433	0.77806	0.334207	0.256729	6.08819e-121	5.32991e-116
FBgn0034792	YME1L	0.260031	1.36817	0.830057	0.313268	0.198558	1.91646e-92	1.67777e-87
FBgn0035878	CG7182	0.259981	2.53828	0.950539	0.273509	0.173859	1.25261e-80	1.0966e-75
FBgn0083167	Neb-cGP	0.259922	11.6993	1	0.259922	0.156474	2.07921e-72	1.82025e-67
FBgn0042138	CG18815	0.259624	1.97009	0.915029	0.283733	0.19661	1.66101e-91	1.45413e-86
FBgn0284246	l(2)k09848	0.259569	1.43051	0.826252	0.314152	0.185564	3.30381e-86	2.89232e-81
FBgn0027889	ball	0.259305	2.6198	0.948637	0.273345	0.212774	2.54856e-99	2.23113e-94
FBgn0030196	Psf3	0.259283	1.26674	0.78123	0.33189	0.187771	2.90497e-87	2.54316e-82
FBgn0263911	COX8	0.25919	13.4694	0.999366	0.259354	0.147374	3.88414e-68	3.40037e-63
FBgn0010612	ATPsynG	0.259158	18.053	1	0.259158	0.156509	2.00013e-72	1.75101e-67
FBgn0000115	Arl1	0.259139	2.37918	0.934052	0.277435	0.192356	1.8392e-89	1.61013e-84
FBgn0285937	Rab1	0.25901	4.87679	0.994293	0.260497	0.207522	8.98217e-97	7.86344e-92
FBgn0029133	REG	0.258886	5.10319	0.994927	0.260206	0.20143	7.89967e-94	6.91577e-89
FBgn0032393	Nfs1	0.258885	0.955652	0.705136	0.367141	0.211593	9.54355e-99	8.3549e-94
FBgn0033631	Sod3	0.258882	3.52749	0.954344	0.271268	0.201434	7.86453e-94	6.885e-89
FBgn0030151	CG1354	0.258881	2.83935	0.961319	0.269297	0.179206	3.58126e-83	3.13522e-78
FBgn0037899	RpL24-like	0.258828	11.7909	0.999366	0.258992	0.129497	8.30949e-60	7.27455e-55
FBgn0262736	Vha16-1	0.258721	6.53432	0.998732	0.25905	0.179039	4.29894e-83	3.7635e-78
FBgn0040793	CG7630	0.2587	18.3499	1	0.2587	0.145376	3.34165e-67	2.92545e-62
FBgn0035528	CG15012	0.258585	3.69455	0.987952	0.261739	0.189215	5.90559e-88	5.17005e-83
FBgn0040650	CG15456	0.258489	0.996669	0.708307	0.36494	0.180514	8.52127e-84	7.45995e-79
FBgn0039555	mRpS22	0.258379	1.50943	0.851617	0.303398	0.187048	6.44101e-87	5.63878e-82
FBgn0061492	loj	0.258132	1.68814	0.871275	0.296269	0.170927	3.08814e-79	2.70351e-74
FBgn0047135	CG32276	0.258041	10.2204	0.999366	0.258204	0.155596	5.37728e-72	4.70754e-67
FBgn0005624	Psc	0.257998	4.05179	0.982245	0.262662	0.224693	3.96115e-105	3.46779e-100
FBgn0031771	ND-51	0.257933	2.2079	0.920101	0.280331	0.149283	4.95124e-69	4.33457e-64
FBgn0033400	CG2063	0.257887	1.57648	0.862397	0.299035	0.186315	1.4441e-86	1.26423e-81
FBgn0033468	CG1418	0.257832	1.48229	0.832594	0.309674	0.182471	9.92487e-85	8.68873e-80
FBgn0000426	SmF	0.257727	9.17863	0.999366	0.257891	0.17331	2.28519e-80	2.00057e-75
FBgn0034744	Vps20	0.257719	1.7586	0.902346	0.285609	0.205213	1.17646e-95	1.02993e-90
FBgn0026206	mei-P26	0.257631	3.51195	0.969562	0.265719	0.191444	5.04304e-89	4.41493e-84
FBgn0037892	mRpL40	0.257524	1.68148	0.874445	0.2945	0.168079	6.91167e-78	6.05082e-73
FBgn0003009	ord	0.25742	0.486909	0.432467	0.595237	0.209649	8.3667e-98	7.32463e-93
FBgn0039558	BCAS2	0.25742	3.2659	0.965758	0.266547	0.172208	7.6179e-80	6.66909e-75
FBgn0038552	Alg1	0.257373	2.20367	0.925808	0.277998	0.204541	2.48625e-95	2.17658e-90
FBgn0004132	boca	0.257328	2.97527	0.969562	0.265406	0.189313	5.30148e-88	4.64118e-83
FBgn0052672	Atg8a	0.257277	8.00698	0.998732	0.257603	0.169845	1.00661e-78	8.81235e-74
FBgn0037747	CG8481	0.257271	1.62215	0.839569	0.306432	0.188551	1.22794e-87	1.075e-82
FBgn0004868	Gdi	0.257228	2.41465	0.937223	0.274457	0.187041	6.49207e-87	5.68348e-82
FBgn0036072	CG6628	0.257196	0.649132	0.487635	0.527437	0.233635	1.6352e-109	1.43153e-104
FBgn0028984	Spn88Ea	0.25714	1.17228	0.774889	0.331841	0.163902	6.53362e-76	5.71986e-71
FBgn0031822	Phf5a	0.257125	6.97368	0.998098	0.257615	0.181642	2.46885e-84	2.16135e-79
FBgn0039403	Sld5	0.257095	1.21332	0.773621	0.332327	0.162004	5.14871e-75	4.50744e-70
FBgn0040070	Trx-2	0.257083	3.1691	0.962587	0.267075	0.198579	1.87129e-92	1.63822e-87
FBgn0004432	Cyp1	0.257012	38.2109	1	0.257012	0.184203	1.47696e-85	1.29301e-80
FBgn0035871	BI-1	0.257006	2.89373	0.963221	0.266819	0.194066	2.77534e-90	2.42967e-85
FBgn0032444	CCT4	0.25698	5.21332	0.98922	0.25978	0.153052	8.44528e-71	7.39342e-66
FBgn0041188	Atx2	0.256943	2.11074	0.912492	0.281584	0.182838	6.62831e-85	5.80276e-80
FBgn0024986	CG3719	0.256937	1.7079	0.86747	0.296191	0.188308	1.60586e-87	1.40585e-82
FBgn0039099	GILT2	0.25685	1.49227	0.816107	0.314726	0.172047	9.08281e-80	7.95155e-75
FBgn0004838	Hrb27C	0.25676	14.806	1	0.25676	0.161962	5.39102e-75	4.71957e-70
FBgn0036500	CG7275	0.256536	1.55846	0.850983	0.301459	0.177294	2.91549e-82	2.55237e-77
FBgn0015321	Ubc4	0.256489	3.25656	0.962587	0.266458	0.192018	2.67195e-89	2.33916e-84
FBgn0001098	Gdh	0.256464	2.04235	0.915663	0.280085	0.191065	7.65978e-89	6.70576e-84
FBgn0032924	Nbr	0.256425	0.980603	0.714648	0.358813	0.199701	5.38801e-93	4.71693e-88
FBgn0019624	COX5A	0.256274	13.0196	0.999366	0.256437	0.160739	2.03499e-74	1.78153e-69
FBgn0034310	Nup75	0.256255	1.32326	0.797083	0.321491	0.204142	3.87195e-95	3.3897e-90
FBgn0000181	bic	0.256255	20.6677	1	0.256255	0.144944	5.3228e-67	4.65984e-62
FBgn0265177	CG44242	0.256149	4.04478	0.991122	0.258443	0.160737	2.03871e-74	1.78479e-69
FBgn0039907	lgs	0.256111	2.88795	0.95371	0.268542	0.166322	4.69214e-77	4.10774e-72
FBgn0026737	CG6171	0.256049	1.45533	0.825618	0.310131	0.154985	1.04305e-71	9.13142e-67
FBgn0052022	CG32022	0.256044	1.06574	0.737476	0.347189	0.16471	2.71306e-76	2.37515e-71
FBgn0086447	l(2)37Cg	0.255971	1.77074	0.874445	0.292723	0.178704	6.2119e-83	5.4382e-78
FBgn0259979	CG17337	0.255905	2.83996	0.942295	0.271576	0.159255	1.01933e-73	8.92376e-69
FBgn0266449	Kr-h2	0.255878	2.49866	0.941027	0.271913	0.176471	7.18331e-82	6.28863e-77
FBgn0036853	mRpL21	0.25582	1.22284	0.783767	0.326398	0.1929	1.00827e-89	8.82694e-85
FBgn0031603	CG15432	0.255734	1.82317	0.904883	0.282615	0.195986	3.31638e-91	2.90332e-86
FBgn0011745	Arp1	0.255707	1.86859	0.908687	0.281402	0.221325	1.75062e-103	1.53258e-98
FBgn0033528	trsn	0.25549	2.74043	0.961953	0.265595	0.23128	2.34853e-108	2.05602e-103
FBgn0031635	tank	0.255427	1.28624	0.79962	0.319435	0.195205	7.86816e-91	6.88819e-86
FBgn0036667	kud	0.25542	4.36589	0.992391	0.257378	0.173626	1.61631e-80	1.415e-75
FBgn0034915	eIF6	0.255413	1.3724	0.809131	0.315664	0.191513	4.67292e-89	4.09091e-84
FBgn0022343	CG3760	0.255392	1.59601	0.857958	0.297675	0.200018	3.78934e-93	3.31738e-88
FBgn0050105	CG30105	0.255253	1.55352	0.856056	0.298173	0.204209	3.59396e-95	3.14633e-90
FBgn0053774	CG33774	0.255233	7.43581	0.999366	0.255395	0.166301	4.80183e-77	4.20376e-72
FBgn0029887	CG3198	0.255162	2.57384	0.946734	0.269518	0.176097	1.08136e-81	9.46679e-77
FBgn0010113	hdc	0.255043	2.87319	0.960051	0.265655	0.190245	1.894e-88	1.6581e-83
FBgn0015924	crq	0.255037	1.5657	0.855422	0.298141	0.202038	4.02246e-94	3.52146e-89
FBgn0037489	CG1234	0.255028	1.73835	0.894737	0.285031	0.180832	6.00782e-84	5.25955e-79
FBgn0261276	Opa1	0.254923	1.33736	0.805327	0.316546	0.18186	1.94325e-84	1.70122e-79
FBgn0002284	Prosbeta6	0.254716	5.26658	0.995561	0.255852	0.179983	1.52618e-83	1.33609e-78
FBgn0030269	CDK2AP1	0.254684	2.40169	0.918833	0.277182	0.158842	1.59428e-73	1.39572e-68
FBgn0261437	CSN8	0.254543	3.02961	0.975269	0.260998	0.190544	1.36187e-88	1.19225e-83
FBgn0011769	Fdx1	0.25451	0.81645	0.643627	0.395431	0.200204	3.08381e-93	2.69972e-88
FBgn0037671	ATP6AP2	0.254406	2.36712	0.942295	0.269985	0.179314	3.18054e-83	2.7844e-78
FBgn0034248	CG14483	0.254401	2.2172	0.923272	0.275542	0.140401	7.04946e-65	6.17145e-60
FBgn0022097	Vha36-1	0.254368	1.82028	0.890298	0.285711	0.189799	3.09935e-88	2.71333e-83
FBgn0262734	eIF4H1	0.254367	3.49499	0.977172	0.260309	0.193917	3.27508e-90	2.86717e-85
FBgn0283478	und	0.25435	1.7935	0.890932	0.285487	0.165117	1.74187e-76	1.52492e-71
FBgn0030341	p24-1	0.254301	1.81263	0.883323	0.287892	0.17546	2.17261e-81	1.90201e-76
FBgn0036740	Vps60	0.254253	1.99411	0.901078	0.282165	0.170098	7.63563e-79	6.68461e-74
FBgn0033428	Updo	0.254235	1.30072	0.806595	0.315196	0.184319	1.30118e-85	1.13912e-80
FBgn0025809	Paf-AHalpha	0.254216	4.15891	0.987952	0.257316	0.163575	9.32818e-76	8.16636e-71
FBgn0039406	RpL34a	0.254213	14.5253	0.999366	0.254375	0.12032	1.46348e-55	1.2812e-50
FBgn0032880	TM9SF2	0.254134	2.29977	0.93215	0.272632	0.181693	2.33347e-84	2.04283e-79
FBgn0005655	PCNA	0.254131	6.13044	0.987318	0.257395	0.153647	4.43587e-71	3.88338e-66
FBgn0037842	CG6567	0.254055	0.881239	0.680406	0.373388	0.185773	2.62517e-86	2.29821e-81
FBgn0040890	ksh	0.253916	1.88654	0.873177	0.290795	0.203338	9.47344e-95	8.29352e-90
FBgn0000146	aub	0.253908	0.793165	0.636652	0.398818	0.178892	5.05265e-83	4.42334e-78
FBgn0033741	CG8545	0.253691	1.66948	0.864299	0.293522	0.175068	3.33936e-81	2.92344e-76
FBgn0028837	CSN6	0.253664	2.38826	0.914394	0.277412	0.163848	6.9316e-76	6.06827e-71
FBgn0261790	SmE	0.253657	11.9285	1	0.253657	0.180903	5.55668e-84	4.8646e-79
FBgn0037020	Pex14	0.253595	1.9298	0.896639	0.282828	0.204945	1.58541e-95	1.38794e-90
FBgn0036059	nudE	0.253593	1.73562	0.888396	0.285451	0.224271	6.37402e-105	5.58013e-100
FBgn0014009	Rab2	0.253589	5.6201	0.997464	0.254234	0.178678	6.38736e-83	5.59181e-78
FBgn0025582	eIF3e	0.253549	4.69248	0.993659	0.255167	0.146112	1.51229e-67	1.32393e-62
FBgn0037644	CG11964	0.253544	1.38463	0.825618	0.307096	0.20664	2.39938e-96	2.10054e-91
FBgn0037822	CG14683	0.253541	1.42616	0.831325	0.304984	0.156556	1.90168e-72	1.66483e-67
FBgn0010222	Nmdmc	0.253481	0.765028	0.587191	0.431684	0.175928	1.30187e-81	1.13972e-76
FBgn0016697	Prosalpha5	0.253467	6.44576	0.993659	0.255084	0.178521	7.59346e-83	6.6477e-78
FBgn0029915	CG14434	0.253375	1.50769	0.834496	0.303627	0.174213	8.50776e-81	7.44812e-76
FBgn0050423	CG30423	0.253371	5.02874	0.997464	0.254015	0.175215	2.84271e-81	2.48865e-76
FBgn0260944	Rbp1	0.253308	7.89549	1	0.253308	0.138774	4.04219e-64	3.53873e-59
FBgn0030545	CG11590	0.253271	1.11708	0.751427	0.337053	0.173124	2.799e-80	2.45039e-75
FBgn0015949	hrg	0.253264	2.4716	0.944198	0.268232	0.219103	2.12427e-102	1.85969e-97
FBgn0034528	CG11180	0.253244	1.79091	0.890298	0.284449	0.149773	2.9189e-69	2.55535e-64
FBgn0032509	CG6523	0.253238	5.35178	0.998098	0.253721	0.171182	2.33739e-79	2.04627e-74
FBgn0037538	CG3223	0.253146	1.47228	0.826886	0.306143	0.162967	1.80778e-75	1.58262e-70
FBgn0039218	Rpb10	0.253088	4.65277	0.994293	0.254541	0.157059	1.1026e-72	9.65274e-68
FBgn0039790	CG2246	0.252873	1.46817	0.85669	0.295174	0.190232	1.92153e-88	1.6822e-83
FBgn0014024	Rnp4F	0.252827	1.05225	0.743183	0.340195	0.205136	1.28068e-95	1.12118e-90
FBgn0038183	CG9286	0.252802	0.829114	0.649334	0.389325	0.198325	2.48227e-92	2.1731e-87
FBgn0033716	Den1	0.252781	1.83595	0.875079	0.288866	0.165026	1.92445e-76	1.68476e-71
FBgn0036696	CG14057	0.252762	2.34901	0.940393	0.268783	0.148809	8.25877e-69	7.23014e-64
FBgn0001961	Arpc1	0.252686	1.99826	0.920101	0.274629	0.20368	6.47873e-95	5.67181e-90
FBgn0035374	mRpS35	0.252573	1.20972	0.789474	0.319925	0.176957	4.21642e-82	3.69127e-77
FBgn0010770	ppan	0.252342	1.73408	0.874445	0.288574	0.14644	1.06271e-67	9.30352e-63
FBgn0052418	vito	0.252225	1.9254	0.899176	0.280507	0.176565	6.47955e-82	5.67252e-77
FBgn0030996	CG14194	0.25222	1.52912	0.854788	0.295067	0.172152	8.1034e-80	7.09412e-75
FBgn0262601	SmB	0.252138	10.6623	0.999366	0.252298	0.155074	9.46951e-72	8.29008e-67
FBgn0085284	Blos3	0.252101	1.17244	0.774889	0.325338	0.152551	1.45061e-70	1.26994e-65
FBgn0025111	Ant2	0.25205	1.17238	0.683576	0.368723	0.2035	7.91621e-95	6.93024e-90
FBgn0031458	aph-1	0.25204	2.66164	0.955612	0.263748	0.207136	1.38121e-96	1.20918e-91
FBgn0017572	Mo25	0.251942	1.69394	0.882689	0.285426	0.192996	9.07038e-90	7.94067e-85
FBgn0016698	Ptpa	0.251676	1.3838	0.825618	0.304833	0.186951	7.17133e-87	6.27814e-82
FBgn0031361	CG17652	0.251643	1.13859	0.763475	0.329602	0.177651	1.97106e-82	1.72556e-77
FBgn0030067	Rbm13	0.25155	2.41215	0.915663	0.274719	0.13304	1.8839e-61	1.64926e-56
FBgn0026144	CBP	0.251389	2.0427	0.894103	0.281163	0.187361	4.56331e-87	3.99495e-82
FBgn0032374	CG14931	0.25138	0.565622	0.49461	0.508239	0.181606	2.56898e-84	2.24901e-79
FBgn0000611	exd	0.251257	2.13765	0.929613	0.270281	0.18758	3.58592e-87	3.1393e-82
FBgn0037007	CG5059	0.25115	2.02537	0.90298	0.278134	0.251277	3.13711e-118	2.74638e-113
FBgn0035601	Uev1A	0.251104	6.05597	0.999366	0.251263	0.185756	2.6731e-86	2.34016e-81
FBgn0000579	Eno	0.251098	13.8953	0.997464	0.251737	0.192276	2.00961e-89	1.75932e-84
FBgn0004889	tws	0.251062	1.31757	0.798985	0.314226	0.230291	7.1732e-108	6.27978e-103
FBgn0040666	CG12848	0.250981	2.55888	0.95371	0.263163	0.156317	2.46295e-72	2.15619e-67
FBgn0020633	Mcm7	0.25094	2.24182	0.934052	0.268657	0.18576	2.66103e-86	2.3296e-81
FBgn0051992	gw	0.250912	3.10211	0.973367	0.257778	0.153989	3.06411e-71	2.68247e-66
FBgn0035590	Prpk	0.250798	1.11837	0.771084	0.325254	0.173804	1.33034e-80	1.16465e-75
FBgn0003495	spz	0.250755	2.07403	0.861129	0.291193	0.150355	1.55672e-69	1.36283e-64
FBgn0003360	sesB	0.250586	19.7534	0.999366	0.250745	0.121803	3.02448e-56	2.64778e-51
FBgn0051301	CG31301	0.250494	1.9893	0.920736	0.272059	0.165644	9.81928e-77	8.59629e-72
FBgn0086707	ncm	0.250476	3.07954	0.962587	0.260211	0.172449	5.8534e-80	5.12436e-75
FBgn0028546	ics	0.250462	2.09996	0.861129	0.290853	0.109588	1.27251e-50	1.11402e-45
FBgn0037121	Rpb8	0.250336	2.43252	0.949271	0.263714	0.180678	7.11828e-84	6.2317e-79
FBgn0037182	ArfGAP3	0.250326	1.64949	0.861763	0.290482	0.169034	2.43896e-78	2.13519e-73
FBgn0015737	Hmu	0.250284	1.59901	0.883323	0.283344	0.213943	6.89358e-100	6.03499e-95
FBgn0024364	CG11417	0.250281	2.12493	0.901712	0.277562	0.142165	1.05826e-65	9.26455e-61
FBgn0033715	CG8490	0.250197	1.30801	0.79962	0.312895	0.166256	5.03884e-77	4.41125e-72
FBgn0028737	eEF1beta	0.250131	41.2227	1	0.250131	0.142211	1.00795e-65	8.82412e-61
FBgn0038065	Snx3	0.250052	2.54108	0.94293	0.265187	0.163684	8.28486e-76	7.25298e-71
FBgn0013954	Fkbp12	0.25002	29.1674	1	0.25002	0.184348	1.26039e-85	1.10341e-80
FBgn0014029	2020-09-02	0.249991	2.62431	0.958148	0.26091	0.205995	4.9241e-96	4.3108e-91
FBgn0029503	CHORD	0.249964	1.16923	0.75967	0.329043	0.151341	5.36491e-70	4.69671e-65
FBgn0032916	CG9257	0.249881	0.963482	0.715916	0.349036	0.179046	4.26674e-83	3.73532e-78
FBgn0026479	Drp1	0.249845	1.31204	0.808497	0.309024	0.19724	8.26189e-92	7.23288e-87
FBgn0000412	D1	0.249576	10.8206	0.999366	0.249734	0.171501	1.65085e-79	1.44523e-74
FBgn0034277	OstDelta	0.249518	2.8891	0.96449	0.258704	0.196381	2.13996e-91	1.87343e-86
FBgn0261954	east	0.249393	2.05622	0.916297	0.272175	0.172968	3.32126e-80	2.90759e-75
FBgn0040235	c12.1	0.24922	3.06499	0.967026	0.257718	0.160286	3.32738e-74	2.91296e-69
FBgn0034399	CG15083	0.249212	2.22617	0.914394	0.272544	0.150207	1.82708e-69	1.59952e-64
FBgn0024556	mEFTu1	0.249188	2.66245	0.955612	0.260762	0.1759	1.34197e-81	1.17483e-76
FBgn0260940	lsn	0.24916	1.3342	0.815472	0.305541	0.160219	3.57702e-74	3.1315e-69
FBgn0028708	Mst85C	0.249024	2.06384	0.912492	0.272906	0.144676	7.10275e-67	6.2181e-62
FBgn0261933	SmD1	0.248817	5.71457	0.995561	0.249927	0.184617	9.36555e-86	8.19907e-81
FBgn0027053	CSN5	0.248807	2.64515	0.9461	0.262982	0.155145	8.77114e-72	7.6787e-67
FBgn0037652	CG11980	0.248802	1.83749	0.890932	0.27926	0.158903	1.4932e-73	1.30722e-68
FBgn0040985	CG6115	0.2488	1.96066	0.915029	0.271904	0.168271	5.60907e-78	4.91046e-73
FBgn0035233	Pex10	0.248565	1.15724	0.761573	0.326384	0.128101	3.6867e-59	3.22752e-54
FBgn0038149	GILT1	0.24854	2.8534	0.936588	0.265367	0.17598	1.22914e-81	1.07605e-76
FBgn0004066	Prosalpha4	0.248533	5.85546	0.981611	0.253189	0.163442	1.07814e-75	9.43857e-71
FBgn0262801	twr	0.248436	6.68677	0.999366	0.248594	0.148279	1.46285e-68	1.28065e-63
FBgn0261394	Prosalpha3	0.248375	5.96662	0.989854	0.250921	0.143639	2.16896e-66	1.89881e-61
FBgn0037011	CG4858	0.248299	0.891425	0.675967	0.367324	0.172327	6.68934e-80	5.85618e-75
FBgn0036489	CG7011	0.248252	1.28247	0.805327	0.308263	0.17329	2.33488e-80	2.04407e-75
FBgn0052259	CG32259	0.247951	0.673113	0.512999	0.483337	0.225602	1.42345e-105	1.24616e-100
FBgn0087035	AGO2	0.247879	1.06959	0.736842	0.336407	0.203752	5.97649e-95	5.23212e-90
FBgn0004177	mts	0.24784	19.5145	1	0.24784	0.159838	5.41008e-74	4.73626e-69
FBgn0025640	CG13369	0.247817	1.36163	0.810399	0.305797	0.147652	2.87623e-68	2.518e-63
FBgn0039175	beta-PheRS	0.247791	0.756087	0.617628	0.401197	0.170427	5.33171e-79	4.66765e-74
FBgn0033378	tsu	0.247754	6.84622	0.999366	0.247911	0.182127	1.44822e-84	1.26784e-79
FBgn0037305	CG12173	0.247599	0.813764	0.656309	0.37726	0.185724	2.76963e-86	2.42467e-81
FBgn0026873	MED18	0.247567	1.89152	0.887762	0.278867	0.162968	1.8044e-75	1.57966e-70
FBgn0051357	CG31357	0.247472	1.39883	0.826886	0.299282	0.171477	1.69366e-79	1.48271e-74
FBgn0261278	grp	0.24743	2.02413	0.899176	0.275174	0.163712	8.03619e-76	7.03528e-71
FBgn0035520	CG11586	0.247037	1.7242	0.886493	0.278668	0.14509	4.54937e-67	3.98275e-62
FBgn0029870	Marf	0.247	1.86748	0.876347	0.281851	0.166597	3.47631e-77	3.04334e-72
FBgn0031776	Pfdn1	0.246982	2.25452	0.93532	0.264061	0.137171	2.25533e-63	1.97443e-58
FBgn0015359	CG2034	0.246872	1.10173	0.749524	0.329372	0.154153	2.56469e-71	2.24526e-66
FBgn0014869	Pglym78	0.246864	3.46903	0.936588	0.263578	0.154735	1.36711e-71	1.19684e-66
FBgn0025716	Bap55	0.246708	3.71916	0.972733	0.253623	0.17259	5.02053e-80	4.39522e-75
FBgn0265418	lncRNA:CR44330	0.246459	0.639216	0.495244	0.497651	0.187588	3.55418e-87	3.1115e-82
FBgn0029176	eEF1gamma	0.246392	24.5527	1	0.246392	0.109751	1.07074e-50	9.3738e-46
FBgn0029801	CG15771	0.246321	1.44271	0.805961	0.305624	0.162856	2.03973e-75	1.78568e-70
FBgn0000416	Sap-r	0.246205	1.93896	0.909956	0.270568	0.176325	8.42616e-82	7.37668e-77
FBgn0042134	Capr	0.246088	2.14723	0.923906	0.266356	0.189418	4.71979e-88	4.13194e-83
FBgn0265192	Snp	0.245971	2.90617	0.960051	0.256206	0.147282	4.28774e-68	3.7537e-63
FBgn0010602	lwr	0.245863	8.66844	1	0.245863	0.141372	2.48282e-65	2.17358e-60
FBgn0001994	crp	0.24583	3.82396	0.984147	0.249789	0.208287	3.82372e-97	3.34748e-92
FBgn0013753	Bgb	0.245801	2.83978	0.96449	0.254851	0.196686	1.52693e-91	1.33675e-86
FBgn0284257	Ttd14	0.245687	1.28109	0.79201	0.310206	0.188395	1.45939e-87	1.27763e-82
FBgn0035877	CG7083	0.245627	0.873554	0.672162	0.365429	0.179443	2.76095e-83	2.41707e-78
FBgn0015544	spag	0.245551	1.30824	0.768548	0.319499	0.154894	1.15101e-71	1.00765e-66
FBgn0015829	TfIIEbeta	0.2455	1.62943	0.860495	0.285301	0.166515	3.80241e-77	3.32882e-72
FBgn0037270	eIF3f1	0.2455	7.20845	0.999366	0.245656	0.137187	2.21787e-63	1.94164e-58
FBgn0034258	eIF3c	0.245374	3.14408	0.980977	0.250132	0.165035	1.90412e-76	1.66696e-71
FBgn0032408	CG6712	0.245342	2.13677	0.915663	0.26794	0.157824	4.81352e-73	4.21399e-68
FBgn0034299	CG5757	0.245286	1.42788	0.844642	0.290403	0.186342	1.40217e-86	1.22753e-81
FBgn0033117	CG3358	0.245271	1.27062	0.806595	0.304083	0.167191	1.82065e-77	1.59389e-72
FBgn0026259	eIF5B	0.245271	1.75581	0.895371	0.273932	0.184974	6.32813e-86	5.53996e-81
FBgn0034398	CG15098	0.245231	1.51862	0.828155	0.296117	0.138971	3.26978e-64	2.86253e-59
FBgn0014930	CG2846	0.24516	0.942957	0.693088	0.353721	0.158176	3.28571e-73	2.87648e-68
FBgn0013432	bcn92	0.245121	1.75895	0.885859	0.276704	0.151647	3.85468e-70	3.37458e-65
FBgn0016034	mael	0.245091	1.35577	0.790108	0.310199	0.155215	8.13088e-72	7.11818e-67
FBgn0027565	CG5498	0.24509	0.994139	0.731769	0.334927	0.186399	1.31655e-86	1.15257e-81
FBgn0086134	Prosalpha2	0.244944	4.80519	0.984147	0.24889	0.157534	6.58812e-73	5.76757e-68
FBgn0069242	eca	0.244916	3.87628	0.991122	0.247109	0.142266	9.49894e-66	8.31584e-61
FBgn0011289	TfIIA-L	0.244792	2.00204	0.892834	0.274174	0.153216	7.06655e-71	6.18641e-66
FBgn0004888	Scsalpha1	0.24475	2.71338	0.951807	0.257142	0.155738	4.61076e-72	4.03649e-67
FBgn0028399	TMS1	0.244591	1.85026	0.903614	0.270681	0.212307	4.29706e-99	3.76186e-94
FBgn0265262	Vha68-1	0.244573	0.870064	0.667724	0.366279	0.262258	1.05899e-123	9.27089e-119
FBgn0031066	COX6B	0.244342	11.9456	1	0.244342	0.0977988	3.15922e-45	2.76574e-40
FBgn0001142	Gs1	0.2442	1.62873	0.874445	0.279263	0.181197	4.02508e-84	3.52376e-79
FBgn0002044	swm	0.24401	2.03423	0.912492	0.267411	0.165622	1.00512e-76	8.79932e-72
FBgn0050349	CG30349	0.243943	1.53114	0.844008	0.28903	0.167251	1.70512e-77	1.49275e-72
FBgn0047114	CG31142	0.243943	0.763409	0.638554	0.382024	0.155105	9.15131e-72	8.01152e-67
FBgn0035370	Non2	0.243919	7.00288	0.999366	0.244074	0.138939	3.38518e-64	2.96356e-59
FBgn0011824	CG4038	0.243844	5.85965	0.995561	0.244931	0.122419	1.57073e-56	1.3751e-51
FBgn0052075	CG32075	0.243831	0.916316	0.686113	0.355381	0.167489	1.31551e-77	1.15167e-72
FBgn0010391	Gtp-bp	0.243678	1.12873	0.759036	0.321037	0.190911	9.08033e-89	7.94937e-84
FBgn0034614	CG9752	0.243513	0.793784	0.644261	0.377972	0.18704	6.50125e-87	5.69152e-82
FBgn0262519	Mi-2	0.243489	2.11703	0.918833	0.264998	0.167308	1.60116e-77	1.40173e-72
FBgn0041191	Rheb	0.243451	2.26864	0.918833	0.264957	0.139127	2.76615e-64	2.42162e-59
FBgn0035517	CG1265	0.243445	1.10964	0.742549	0.32785	0.17763	2.0164e-82	1.76526e-77
FBgn0036909	Ccdc58	0.243331	1.36437	0.820545	0.296548	0.141399	2.41237e-65	2.11191e-60
FBgn0010333	Rac1	0.243315	4.91194	0.996829	0.244089	0.116829	5.95484e-54	5.21316e-49
FBgn0030753	rngo	0.24327	2.16288	0.907419	0.26809	0.190993	8.29301e-89	7.26011e-84
FBgn0030733	UQCR-14	0.243169	11.4475	1	0.243169	0.104193	3.77872e-48	3.30808e-43
FBgn0035064	TyrRS-m	0.243155	0.721103	0.61636	0.394501	0.183549	3.03353e-85	2.65571e-80
FBgn0037262	MED31	0.243128	1.85047	0.906785	0.268121	0.144383	9.7386e-67	8.52566e-62
FBgn0030352	sicily	0.243111	1.21751	0.757768	0.320825	0.169463	1.52698e-78	1.3368e-73
FBgn0011016	SsRbeta	0.242543	2.78377	0.951173	0.254994	0.137998	9.29248e-64	8.13511e-59
FBgn0039563	CG4951	0.242505	1.12584	0.781864	0.310162	0.185872	2.35336e-86	2.06025e-81
FBgn0038923	mRpL35	0.242205	1.8351	0.898542	0.269553	0.154264	2.27589e-71	1.99242e-66
FBgn0039357	CG4743	0.242168	0.739356	0.626506	0.386537	0.200042	3.69038e-93	3.23074e-88
FBgn0261789	SmD2	0.242064	7.88898	0.999366	0.242218	0.143491	2.5439e-66	2.22706e-61
FBgn0052344	CG32344	0.241855	1.24623	0.792644	0.305124	0.147579	3.11105e-68	2.72357e-63
FBgn0038984	AdipoR	0.241707	1.94327	0.908053	0.266181	0.152553	1.44793e-70	1.26759e-65
FBgn0038601	CG18600	0.241658	1.29959	0.79201	0.30512	0.136215	6.28333e-63	5.50074e-58
FBgn0001218	Hsc70-3	0.241506	6.27847	0.998098	0.241967	0.157323	8.27785e-73	7.24685e-68
FBgn0037446	Zif	0.241414	1.8546	0.894737	0.269815	0.152695	1.2413e-70	1.0867e-65
FBgn0037137	Nopp140	0.241315	2.02715	0.90298	0.267243	0.136517	4.54647e-63	3.98021e-58
FBgn0028648	mRpL50	0.241264	1.52959	0.856056	0.281832	0.150524	1.29657e-69	1.13508e-64
FBgn0035630	CG10576	0.241202	2.58943	0.949271	0.254092	0.149471	4.04247e-69	3.53898e-64
FBgn0033691	CG8860	0.24091	12.9227	0.999366	0.241063	0.0884102	5.93367e-41	5.19463e-36
FBgn0035526	CG1316	0.240908	2.03426	0.923906	0.260749	0.209709	7.82355e-98	6.84913e-93
FBgn0263006	SERCA	0.240752	1.59148	0.866836	0.277737	0.141184	3.03688e-65	2.65864e-60
FBgn0032189	Ripalpha	0.240746	1.89182	0.904883	0.266052	0.16921	2.01325e-78	1.7625e-73
FBgn0017551	Rca1	0.240635	2.14535	0.908687	0.264816	0.191376	5.43237e-89	4.75577e-84
FBgn0025742	mtm	0.240634	1.03286	0.743817	0.323512	0.175577	1.91134e-81	1.67328e-76
FBgn0284220	Top2	0.240548	2.61248	0.948637	0.253573	0.189103	6.68497e-88	5.85236e-83
FBgn0032015	Ostgamma	0.240492	3.16447	0.979708	0.245473	0.165324	1.39086e-76	1.21763e-71
FBgn0266452	CTPsyn	0.240397	1.36982	0.805327	0.298509	0.168453	4.59784e-78	4.02518e-73
FBgn0038331	Ccm3	0.240319	1.37527	0.821814	0.292426	0.178658	6.53038e-83	5.71702e-78
FBgn0266518	Dpit47	0.24029	1.85361	0.894737	0.268559	0.132628	2.92507e-61	2.56075e-56
FBgn0038738	CG4572	0.240279	1.11812	0.757134	0.317354	0.146403	1.10551e-67	9.67823e-63
FBgn0032720	mRpL13	0.240158	1.75513	0.871275	0.275639	0.130183	3.99118e-60	3.49408e-55
FBgn0069923	CG41128	0.240124	7.57669	0.998732	0.240429	0.102011	3.76443e-47	3.29557e-42
FBgn0265523	Smr	0.239985	3.82222	0.959417	0.250137	0.122832	1.01215e-56	8.8609e-52
FBgn0003449	snf	0.239964	3.31208	0.968294	0.247822	0.149256	5.10152e-69	4.46612e-64
FBgn0020305	dbe	0.239907	1.63576	0.858592	0.279419	0.131096	1.50457e-60	1.31717e-55
FBgn0250850	rig	0.239778	0.851308	0.667724	0.359098	0.154475	1.81099e-71	1.58543e-66
FBgn0024227	aurB	0.239718	2.95016	0.944832	0.253715	0.126385	2.29936e-58	2.01298e-53
FBgn0037094	CG7611	0.239694	1.12723	0.753329	0.31818	0.173265	2.3991e-80	2.10029e-75
FBgn0026400	Noa36	0.239626	1.26459	0.792644	0.302312	0.131571	9.0584e-61	7.93018e-56
FBgn0023175	Prosalpha7	0.239397	3.44441	0.979708	0.244355	0.162145	4.41857e-75	3.86823e-70
FBgn0035907	GstO1	0.239316	0.760885	0.628408	0.380829	0.163824	7.11379e-76	6.22777e-71
FBgn0010217	ATPsynbeta	0.239212	12.3356	1	0.239212	0.119736	2.72091e-55	2.38202e-50
FBgn0028692	Rpn2	0.239183	2.28903	0.897907	0.266378	0.136289	5.80874e-63	5.08526e-58
FBgn0031093	CG9581	0.239142	0.943306	0.700698	0.341291	0.161867	5.97402e-75	5.22995e-70
FBgn0030611	CG15027	0.239065	1.39554	0.800254	0.298736	0.170545	4.6861e-79	4.10245e-74
FBgn0026262	bip2	0.239007	5.76799	0.996829	0.239767	0.135961	8.2566e-63	7.22824e-58
FBgn0034726	Mes4	0.238977	1.3339	0.821179	0.291017	0.161568	8.26799e-75	7.23821e-70
FBgn0031253	CG11885	0.238927	1.28312	0.804692	0.296917	0.145415	3.20391e-67	2.80486e-62
FBgn0031057	Ubqn	0.238831	1.47463	0.836398	0.285548	0.15536	6.94682e-72	6.0816e-67
FBgn0033104	CG15237	0.238757	1.84347	0.886493	0.269328	0.147756	2.57237e-68	2.25198e-63
FBgn0043884	mask	0.238713	1.31275	0.793912	0.30068	0.15913	1.16755e-73	1.02213e-68
FBgn0032514	CG9302	0.238534	1.10053	0.753329	0.31664	0.156779	1.49275e-72	1.30683e-67
FBgn0053198	pen-2	0.238507	2.22803	0.930881	0.256216	0.162935	1.87077e-75	1.63776e-70
FBgn0250791	alphaSnap	0.238396	1.69465	0.871275	0.273618	0.135852	9.27537e-63	8.12012e-58
FBgn0263863	mRpL45	0.238348	1.32711	0.820545	0.290475	0.146371	1.144e-67	1.00152e-62
FBgn0033523	CG12895	0.23826	1.70199	0.872543	0.273064	0.148988	6.80839e-69	5.9604e-64
FBgn0263084	HP1Lcsd	0.238187	0.465121	0.431198	0.552384	0.183397	3.58491e-85	3.13841e-80
FBgn0045823	vsg	0.238162	2.12614	0.936588	0.254287	0.159861	5.27726e-74	4.61997e-69
FBgn0034913	Snap29	0.238159	1.34075	0.804692	0.295963	0.152166	2.20018e-70	1.92615e-65
FBgn0034000	CG11808	0.23796	1.10645	0.735574	0.323503	0.14375	1.92364e-66	1.68405e-61
FBgn0000253	Cam	0.237945	15.416	1	0.237945	0.177147	3.42371e-82	2.99728e-77
FBgn0062442	Cisd2	0.23789	2.29455	0.941661	0.252628	0.119838	2.4413e-55	2.13723e-50
FBgn0034361	mRpS28	0.23785	2.22537	0.941661	0.252586	0.148374	1.32034e-68	1.15589e-63
FBgn0259742	CG42360	0.237845	1.34591	0.805327	0.29534	0.169649	1.24656e-78	1.0913e-73
FBgn0035720	CG10077	0.237772	3.36085	0.976538	0.243485	0.158476	2.37329e-73	2.0777e-68
FBgn0039266	CG11791	0.237755	3.16855	0.97844	0.242994	0.215582	1.09987e-100	9.62878e-96
FBgn0036581	MED10	0.237702	2.23674	0.925174	0.256927	0.13869	4.42296e-64	3.87208e-59
FBgn0027949	msb1l	0.237661	3.07291	0.963855	0.246574	0.12543	6.3623e-58	5.56988e-53
FBgn0015834	eIF3i	0.23754	10.5914	1	0.23754	0.107492	1.1652e-49	1.02007e-44
FBgn0263143	vret	0.23742	0.916443	0.680406	0.348939	0.149205	5.38983e-69	4.71853e-64
FBgn0037185	CG11367	0.237251	1.06878	0.738744	0.321154	0.135321	1.63816e-62	1.43412e-57
FBgn0025676	CkIIalpha-i3	0.237206	0.699557	0.603678	0.392935	0.187811	2.77727e-87	2.43136e-82
FBgn0010317	CycJ	0.237188	0.728232	0.610653	0.388416	0.151496	4.54013e-70	3.97466e-65
FBgn0001233	Hsp83	0.237135	32.7765	1	0.237135	0.145094	4.52727e-67	3.96339e-62
FBgn0263852	Dad1	0.237124	4.41495	0.991122	0.239248	0.123415	5.43972e-57	4.7622e-52
FBgn0032586	Tpr2	0.236787	1.52837	0.849715	0.278667	0.131591	8.86848e-61	7.76391e-56
FBgn0038043	CG17202	0.236758	2.31199	0.933418	0.253646	0.242014	1.21582e-113	1.06439e-108
FBgn0015372	RabX1	0.236696	1.04645	0.73494	0.322062	0.132209	4.58007e-61	4.00963e-56
FBgn0032596	Prosbeta4	0.236651	5.39615	0.994293	0.238009	0.152473	1.57852e-70	1.38192e-65
FBgn0259481	Mob2	0.236645	1.13405	0.752695	0.314397	0.17206	8.95664e-80	7.84109e-75
FBgn0032248	Bug22	0.236564	2.73616	0.951173	0.248708	0.14369	2.0526e-66	1.79695e-61
FBgn0029594	CG14806	0.236543	1.86696	0.894103	0.264559	0.126761	1.53933e-58	1.34761e-53
FBgn0013531	MED20	0.236532	1.25845	0.77806	0.304002	0.149034	6.4784e-69	5.67152e-64
FBgn0003261	Rm62	0.236515	12.6788	1	0.236515	0.118261	1.30307e-54	1.14077e-49
FBgn0032193	CG5727	0.236461	1.23061	0.769182	0.307419	0.15586	4.04306e-72	3.53949e-67
FBgn0004828	His3.3B	0.236331	16.9676	1	0.236331	0.0854317	1.33386e-39	1.16773e-34
FBgn0015509	Cul1	0.236303	2.26564	0.913126	0.258784	0.145142	4.29889e-67	3.76347e-62
FBgn0036746	Crtc	0.236289	1.58369	0.852251	0.277253	0.151009	7.68088e-70	6.72423e-65
FBgn0037199	CG11137	0.236268	3.87167	0.985415	0.239765	0.126648	1.73734e-58	1.52095e-53
FBgn0030788	Sap30	0.235978	2.478	0.937223	0.251784	0.114597	6.34588e-53	5.5555e-48
FBgn0263832	Rcd5	0.235958	1.60298	0.858592	0.27482	0.162623	2.62785e-75	2.30055e-70
FBgn0015805	HDAC1	0.235836	2.68509	0.9461	0.249272	0.166936	2.40278e-77	2.10351e-72
FBgn0015621	Clp	0.23568	1.31464	0.78884	0.298768	0.140931	3.98911e-65	3.49227e-60
FBgn0037024	tzn	0.235659	2.36721	0.92454	0.254894	0.147318	4.12392e-68	3.61029e-63
FBgn0267790	rump	0.235562	3.13418	0.971465	0.242481	0.167807	9.30309e-78	8.14439e-73
FBgn0263231	bel	0.23551	9.56677	0.999366	0.23566	0.11227	7.45847e-52	6.52952e-47
FBgn0030692	mRpS30	0.235506	1.32914	0.788205	0.298787	0.144066	1.36937e-66	1.19882e-61
FBgn0035722	CG10075	0.235504	1.27884	0.809131	0.291058	0.150631	1.15498e-69	1.01113e-64
FBgn0032138	CG4364	0.235467	5.20574	0.990488	0.237728	0.108577	3.70496e-50	3.24351e-45
FBgn0037552	CG7800	0.235322	0.837878	0.665187	0.353768	0.184355	1.25015e-85	1.09444e-80
FBgn0026257	cav	0.235254	1.52245	0.849081	0.277069	0.134311	4.83383e-62	4.23177e-57
FBgn0030711	Rrp47	0.23525	3.17225	0.943564	0.249321	0.123466	5.15504e-57	4.51298e-52
FBgn0027866	CG9776	0.235214	1.92865	0.896005	0.262514	0.160325	3.1911e-74	2.79365e-69
FBgn0265101	Sgt1	0.235186	1.6441	0.85986	0.273516	0.138948	3.35276e-64	2.93517e-59
FBgn0032846	Pyroxd1	0.235057	0.683489	0.603678	0.389374	0.169735	1.13457e-78	9.93261e-74
FBgn0037550	CG9667	0.234895	1.81815	0.900444	0.260866	0.197978	3.64567e-92	3.1916e-87
FBgn0034728	rad50	0.234858	0.747993	0.622067	0.377544	0.185216	4.84645e-86	4.24283e-81
FBgn0023395	Chd3	0.234835	0.957546	0.696893	0.336974	0.153727	4.06872e-71	3.56196e-66
FBgn0022023	eIF3h	0.234826	5.34054	0.995561	0.235873	0.127803	5.0673e-59	4.43617e-54
FBgn0051151	wge	0.234715	2.55512	0.940393	0.249592	0.141631	1.88021e-65	1.64603e-60
FBgn0015618	Cdk8	0.2347	0.829909	0.650602	0.360742	0.161604	7.95346e-75	6.96286e-70
FBgn0029502	Coq7	0.234674	1.48577	0.828155	0.28337	0.141447	2.29027e-65	2.00501e-60
FBgn0039219	CG13630	0.234522	0.850203	0.660748	0.354934	0.170381	5.60834e-79	4.90982e-74
FBgn0025109	Bem46	0.234497	1.06972	0.762207	0.307655	0.155072	9.48961e-72	8.30768e-67
FBgn0036537	CG18081	0.234488	3.94714	0.987318	0.2375	0.109927	8.88927e-51	7.78211e-46
FBgn0043455	CG5986	0.234458	2.99325	0.963221	0.24341	0.137952	9.76474e-64	8.54855e-59
FBgn0034654	eIF3k	0.234444	9.17571	0.999366	0.234593	0.0928093	5.93293e-43	5.19398e-38
FBgn0036277	CG10418	0.234368	2.83491	0.965758	0.242677	0.152145	2.24999e-70	1.96976e-65
FBgn0035631	Txl	0.234356	1.85859	0.903614	0.259354	0.139565	1.72831e-64	1.51305e-59
FBgn0086687	Desat1	0.234196	2.2347	0.918833	0.254884	0.123974	3.00126e-57	2.62745e-52
FBgn0005671	Vha55	0.234192	1.6882	0.882055	0.265507	0.142723	5.80634e-66	5.08316e-61
FBgn0025638	Roc1a	0.234144	10.2583	0.998732	0.234441	0.0976501	3.69338e-45	3.23337e-40
FBgn0014879	Set	0.234047	9.00154	0.999366	0.234196	0.165735	8.89184e-77	7.78436e-72
FBgn0051450	mRpS18A	0.234001	1.31905	0.816107	0.286729	0.186622	1.03014e-86	9.01838e-82
FBgn0024196	robl	0.233983	2.80874	0.960685	0.243558	0.116808	6.09305e-54	5.33416e-49
FBgn0039183	Dis3	0.23376	0.976544	0.693722	0.336965	0.163716	8.00577e-76	7.00865e-71
FBgn0031228	ND-15	0.233551	3.86102	0.991122	0.235643	0.101877	4.33375e-47	3.79398e-42
FBgn0034059	CG8320	0.233507	1.24551	0.795815	0.293419	0.189072	6.91871e-88	6.05698e-83
FBgn0262739	AGO1	0.233481	1.69597	0.87064	0.268171	0.196144	2.78334e-91	2.43668e-86
FBgn0034963	Not11	0.233402	0.865696	0.692454	0.337064	0.199322	8.20721e-93	7.185e-88
FBgn0032849	mRpS18B	0.233267	1.18417	0.774255	0.301279	0.131408	1.07888e-60	9.44503e-56
FBgn0033229	CG12822	0.233225	1.15512	0.771718	0.302215	0.150934	8.3305e-70	7.29294e-65
FBgn0267795	Frl	0.233151	5.39237	0.998732	0.233448	0.176639	5.97603e-82	5.23172e-77
FBgn0029079	icln	0.23309	1.78829	0.856056	0.272284	0.130393	3.19141e-60	2.79392e-55
FBgn0040237	bor	0.232789	0.796613	0.63792	0.364919	0.157055	1.10745e-72	9.69515e-68
FBgn0021995	Rs1	0.232753	1.49063	0.840837	0.276811	0.13653	4.48652e-63	3.92772e-58
FBgn0038976	Pfdn5	0.23271	2.99268	0.96766	0.240488	0.125112	8.93193e-58	7.81946e-53
FBgn0023167	SmD3	0.232699	6.38981	0.994293	0.234035	0.111125	2.5067e-51	2.19449e-46
FBgn0035986	CG4022	0.232627	1.41142	0.833228	0.279188	0.14641	1.09795e-67	9.61199e-63
FBgn0034527	CG9945	0.232513	1.082	0.760304	0.305816	0.169374	1.68354e-78	1.47385e-73
FBgn0015031	cype	0.232441	18.5523	1	0.232441	0.0665543	4.45537e-31	3.90045e-26
FBgn0034063	CG8389	0.232419	0.978748	0.71655	0.324358	0.163329	1.21902e-75	1.06719e-70
FBgn0037705	mura	0.232412	0.661866	0.561826	0.413673	0.201403	8.13993e-94	7.1261e-89
FBgn0033751	CG8818	0.232404	1.72396	0.896005	0.259378	0.180856	5.85553e-84	5.12622e-79
FBgn0039902	Zip102B	0.232388	2.08817	0.91059	0.255206	0.140305	7.80869e-65	6.83611e-60
FBgn0038425	CG14881	0.232316	0.794807	0.640457	0.362735	0.153745	3.98977e-71	3.49285e-66
FBgn0037384	dgrn	0.232295	1.30834	0.769182	0.302003	0.140919	4.03913e-65	3.53606e-60
FBgn0085271	CG34242	0.232109	0.940198	0.696893	0.333062	0.153429	5.6174e-71	4.91775e-66
FBgn0035831	CG8038	0.232039	1.0979	0.760938	0.304939	0.145876	1.95049e-67	1.70756e-62
FBgn0032811	CG10268	0.232029	0.986936	0.710843	0.326413	0.147692	2.75491e-68	2.41179e-63
FBgn0031247	CG11562	0.231866	1.16441	0.779962	0.297278	0.104648	2.34046e-48	2.04896e-43
FBgn0267487	Ptp61F	0.231842	2.05915	0.894737	0.259117	0.119743	2.70092e-55	2.36452e-50
FBgn0039402	Vps2	0.231842	1.46101	0.85986	0.269627	0.145463	3.04503e-67	2.66577e-62
FBgn0020255	Ran	0.231675	14.6112	1	0.231675	0.108367	4.6228e-50	4.04703e-45
FBgn0039689	CIA30	0.231507	0.858289	0.672162	0.344422	0.172285	7.00464e-80	6.13221e-75
FBgn0040777	CG14767	0.231499	1.61489	0.861763	0.268634	0.188956	7.86017e-88	6.88118e-83
FBgn0030809	Ubr1	0.23145	1.48626	0.819911	0.282287	0.154571	1.63261e-71	1.42927e-66
FBgn0026533	Dek	0.231442	2.96499	0.958782	0.241391	0.139783	1.36832e-64	1.1979e-59
FBgn0260798	Gprk1	0.231386	1.94483	0.894737	0.258608	0.156365	2.33774e-72	2.04657e-67
FBgn0260407	mRpS23	0.231287	1.30566	0.812302	0.28473	0.139538	1.78034e-64	1.5586e-59
FBgn0011297	Alg3	0.231218	1.0521	0.741915	0.31165	0.150688	1.08676e-69	9.51404e-65
FBgn0027779	VhaSFD	0.231197	1.24953	0.80279	0.287991	0.156144	2.97059e-72	2.6006e-67
FBgn0264492	CkIIalpha	0.231167	6.29888	0.991122	0.233238	0.0948979	6.64064e-44	5.81355e-39
FBgn0031878	sip2	0.23107	1.21142	0.774255	0.298442	0.160108	4.03524e-74	3.53265e-69
FBgn0036670	CG13029	0.231023	1.00943	0.711477	0.324709	0.166478	3.95658e-77	3.46379e-72
FBgn0035692	Sf3b6	0.231012	7.75263	0.999366	0.231158	0.122428	1.55562e-56	1.36187e-51
FBgn0260945	Atg1	0.23099	1.18528	0.769182	0.300307	0.147327	4.0829e-68	3.57437e-63
FBgn0011726	tsr	0.230979	24.7162	1	0.230979	0.0725196	9.18822e-34	8.04382e-29
FBgn0030894	Mvb12	0.230944	1.45204	0.823716	0.280368	0.143073	3.98621e-66	3.48973e-61
FBgn0086683	Spf45	0.230838	2.06614	0.917565	0.251577	0.151372	5.18984e-70	4.54345e-65
FBgn0010215	alpha-Cat	0.230811	3.41373	0.954978	0.241693	0.12802	4.02099e-59	3.52018e-54
FBgn0013717	not	0.230761	1.2423	0.782498	0.294903	0.152508	1.51957e-70	1.3303e-65
FBgn0026373	RpII33	0.230761	1.87226	0.887127	0.260122	0.117814	2.09508e-54	1.83413e-49
FBgn0032032	CG17294	0.230749	0.474296	0.461636	0.499851	0.151393	5.0739e-70	4.44195e-65
FBgn0010173	RpA-70	0.230733	1.3577	0.805961	0.286284	0.132638	2.89552e-61	2.53488e-56
FBgn0030007	alpha-PheRS	0.23073	1.24937	0.778694	0.296305	0.143344	2.97987e-66	2.60873e-61
FBgn0020412	JIL-1	0.230564	7.52371	1	0.230564	0.146306	1.2273e-67	1.07444e-62
FBgn0025724	beta'COP	0.230469	1.18855	0.79201	0.290992	0.173512	1.83087e-80	1.60284e-75
FBgn0004103	Pp1-87B	0.230434	6.02716	0.997464	0.23102	0.112725	4.60878e-52	4.03476e-47
FBgn0026879	CG13364	0.23042	12.6182	1	0.23042	0.0648499	2.59958e-30	2.2758e-25
FBgn0037902	CG5281	0.230307	0.669531	0.581484	0.396067	0.185207	4.89151e-86	4.28227e-81
FBgn0036557	mRpS31	0.230301	1.19699	0.784401	0.293601	0.153008	8.85522e-71	7.75231e-66
FBgn0001224	Hsp23	0.230266	20.5562	0.994927	0.23144	0.0837254	7.91795e-39	6.93177e-34
FBgn0036451	CG9425	0.230108	1.1908	0.795181	0.289379	0.199046	1.11479e-92	9.75941e-88
FBgn0266581	pit	0.230095	1.4159	0.818009	0.281287	0.121739	3.2356e-56	2.83261e-51
FBgn0037298	Sccpdh1	0.230048	1.10756	0.753963	0.305118	0.114601	6.31916e-53	5.53211e-48
FBgn0011217	eff	0.229982	10.3641	1	0.229982	0.0821649	4.03185e-38	3.52968e-33
FBgn0263106	DnaJ-1	0.229979	4.03937	0.95371	0.241141	0.112861	3.99298e-52	3.49565e-47
FBgn0031018	CG12200	0.229978	0.558776	0.478123	0.481002	0.168593	3.94492e-78	3.45358e-73
FBgn0039627	CG11837	0.229972	1.13475	0.760304	0.302474	0.158806	1.65765e-73	1.45119e-68
FBgn0033507	CG12909	0.229914	1.78421	0.883957	0.260097	0.133729	9.00833e-62	7.88634e-57
FBgn0013334	Sap47	0.229869	1.48999	0.843373	0.272559	0.156406	2.23674e-72	1.95815e-67
FBgn0023174	Prosbeta2	0.229766	4.42386	0.980342	0.234373	0.111568	1.56742e-51	1.3722e-46
FBgn0061198	HSPC300	0.229765	2.09995	0.907419	0.253207	0.159099	1.20636e-73	1.05611e-68
FBgn0029589	CG14810	0.229751	0.515209	0.447685	0.513197	0.186246	1.5582e-86	1.36413e-81
FBgn0027525	LTV1	0.229715	3.45575	0.979074	0.234625	0.140209	8.65708e-65	7.57884e-60
FBgn0259168	mnb	0.229699	5.3516	0.993025	0.231312	0.106004	5.60206e-49	4.90433e-44
FBgn0086904	Nacalpha	0.229696	7.36001	0.999366	0.229842	0.133216	1.5603e-61	1.36597e-56
FBgn0020279	lig	0.229665	1.68504	0.886493	0.259072	0.149634	3.39136e-69	2.96896e-64
FBgn0035110	thoc7	0.229639	2.34796	0.930247	0.246858	0.10898	2.41924e-50	2.11793e-45
FBgn0039209	REPTOR	0.229565	1.15777	0.774255	0.296498	0.184996	6.17273e-86	5.40391e-81
FBgn0027597	CG17712	0.229521	0.947511	0.708941	0.323752	0.178026	1.30679e-82	1.14403e-77
FBgn0036505	CG7945	0.229496	3.48939	0.961953	0.238573	0.108449	4.23912e-50	3.71114e-45
FBgn0053100	eIF4EHP	0.229436	1.34848	0.826252	0.277683	0.129487	8.40048e-60	7.3542e-55
FBgn0035194	Psf1	0.229251	1.58423	0.856056	0.267799	0.159674	6.46798e-74	5.66239e-69
FBgn0034065	Rrp42	0.229199	0.914937	0.717185	0.319582	0.17474	4.78115e-81	4.18566e-76
FBgn0031652	jet	0.229098	0.704517	0.595434	0.384758	0.168986	2.57141e-78	2.25115e-73
FBgn0032643	GCS2beta	0.229032	1.36159	0.830057	0.275924	0.136213	6.29617e-63	5.51198e-58
FBgn0039259	CG11781	0.228985	2.93352	0.950539	0.240901	0.107576	1.06601e-49	9.33234e-45
FBgn0031971	Sirup	0.228973	3.35029	0.958782	0.238817	0.142905	4.77478e-66	4.18008e-61
FBgn0036813	Atg3	0.228897	1.29328	0.826886	0.276818	0.150223	1.79573e-69	1.57207e-64
FBgn0017566	ND-75	0.228863	1.52325	0.847178	0.270148	0.142373	8.45956e-66	7.40592e-61
FBgn0029094	asf1	0.228811	1.51358	0.82435	0.277566	0.150936	8.30848e-70	7.27366e-65
FBgn0030109	CG12121	0.22874	1.12898	0.755866	0.302619	0.150868	8.9483e-70	7.83379e-65
FBgn0015925	csul	0.228656	1.05707	0.733672	0.31166	0.138182	7.62991e-64	6.6796e-59
FBgn0039172	Spase22-23	0.228636	3.16083	0.976538	0.23413	0.115911	1.57651e-53	1.38015e-48
FBgn0034948	PPP1R15	0.22862	1.36065	0.807229	0.283216	0.159369	9.00533e-74	7.88372e-69
FBgn0039274	CG11920	0.228529	1.41965	0.812302	0.281335	0.122826	1.01868e-56	8.91803e-52
FBgn0031493	Sf3b2	0.228378	2.38681	0.937857	0.24351	0.141429	2.33496e-65	2.04414e-60
FBgn0001624	dlg1	0.228313	1.74128	0.874445	0.261095	0.144948	5.29846e-67	4.63854e-62
FBgn0021825	DCTN2-p50	0.228311	1.05736	0.731135	0.31227	0.141396	2.41972e-65	2.11834e-60
FBgn0032799	CG10166	0.228283	0.961594	0.706405	0.323162	0.189967	2.57455e-88	2.25389e-83
FBgn0039830	ATPsynC	0.228223	27.0976	1	0.228223	0.0588574	1.27051e-27	1.11227e-22
FBgn0026375	RhoGAPp190	0.228194	1.14003	0.746988	0.305486	0.148959	7.02526e-69	6.15027e-64
FBgn0029714	CG3527	0.228183	2.14973	0.897907	0.254127	0.132532	3.24348e-61	2.83951e-56
FBgn0002633	E(spl)m7-HLH	0.228161	6.56703	0.836398	0.27279	0.101959	3.97805e-47	3.48259e-42
FBgn0036685	CG6664	0.228057	0.966339	0.706405	0.322842	0.138354	6.34247e-64	5.55252e-59
FBgn0033889	CG6701	0.227891	2.83289	0.95688	0.23816	0.12247	1.4868e-56	1.30161e-51
FBgn0031651	mRpL24	0.227834	1.12691	0.752061	0.302946	0.130827	2.0057e-60	1.75589e-55
FBgn0038387	blp	0.22782	0.930335	0.7026	0.324252	0.134661	3.32109e-62	2.90745e-57
FBgn0003885	alphaTub84D	0.227774	4.56359	0.991122	0.229814	0.134091	6.11522e-62	5.35357e-57
FBgn0034050	bug	0.227753	0.945812	0.701966	0.32445	0.179095	4.04347e-83	3.53985e-78
FBgn0033683	CG18343	0.227596	1.66264	0.878884	0.25896	0.124564	1.60079e-57	1.40141e-52
FBgn0259243	Pka-R1	0.227562	1.1272	0.754597	0.301568	0.139311	2.2702e-64	1.98745e-59
FBgn0013756	Mtor	0.227539	1.09841	0.75967	0.299523	0.153651	4.41469e-71	3.86484e-66
FBgn0039302	Nup358	0.227458	1.13283	0.744451	0.305538	0.131646	8.35802e-61	7.31703e-56
FBgn0260456	CG4806	0.227424	1.07808	0.769816	0.295427	0.151327	5.44619e-70	4.76787e-65
FBgn0261609	eIF2alpha	0.227404	3.44639	0.975904	0.233019	0.109919	8.96424e-51	7.84774e-46
FBgn0083124	Uhg4	0.227401	2.67467	0.950539	0.239234	0.151602	4.049e-70	3.5447e-65
FBgn0039125	Ndc1	0.227345	1.24221	0.779962	0.291482	0.152301	1.90109e-70	1.66431e-65
FBgn0265753	lncRNA:CR44560	0.227187	0.57643	0.500317	0.454087	0.2207	3.53286e-103	3.09284e-98
FBgn0039635	Pdhb	0.227152	1.72668	0.887762	0.255871	0.111687	1.38325e-51	1.21097e-46
FBgn0260747	Chchd2	0.227151	2.76869	0.950539	0.23897	0.106751	2.54602e-49	2.22892e-44
FBgn0022238	lolal	0.227113	10.1082	1	0.227113	0.0856664	1.04382e-39	9.13811e-35
FBgn0038277	RpS5b	0.227074	34.4374	1	0.227074	0.0264447	3.6216e-13	3.17053e-08
FBgn0031360	CG31937	0.22693	1.20587	0.777425	0.291899	0.121046	6.7606e-56	5.91857e-51
FBgn0033260	Cul4	0.226841	1.23981	0.786303	0.288491	0.142047	1.20158e-65	1.05192e-60
FBgn0261524	lic	0.226769	1.38982	0.801522	0.282923	0.113873	1.36757e-52	1.19724e-47
FBgn0037573	CG7483	0.226695	2.06195	0.916297	0.247403	0.151042	7.40926e-70	6.48643e-65
FBgn0028926	NC2beta	0.226674	1.8834	0.887762	0.255332	0.144924	5.43792e-67	4.76062e-62
FBgn0038446	CG14903	0.226588	1.04223	0.705136	0.321339	0.142352	8.65843e-66	7.58003e-61
FBgn0015622	Cnx99A	0.226492	6.2577	0.998732	0.226779	0.128984	1.43672e-59	1.25778e-54
FBgn0024509	Sec13	0.226454	2.26491	0.925174	0.244769	0.11997	2.12116e-55	1.85697e-50
FBgn0031782	WDR79	0.226451	1.13917	0.776791	0.291521	0.129642	7.11373e-60	6.22771e-55
FBgn0039764	CG15535	0.226393	1.21348	0.790108	0.286535	0.165293	1.4393e-76	1.26004e-71
FBgn0039993	CG17691	0.226348	1.76081	0.870006	0.260168	0.125785	4.35674e-58	3.81411e-53
FBgn0250814	UQCR-C2	0.226336	1.97888	0.91059	0.24856	0.179901	1.66996e-83	1.46197e-78
FBgn0040075	rept	0.226248	1.1041	0.762207	0.296833	0.169091	2.29286e-78	2.00728e-73
FBgn0037815	Rrp46	0.225954	0.945106	0.697527	0.323937	0.152954	9.38731e-71	8.21812e-66
FBgn0032690	CG10333	0.225914	1.06162	0.736842	0.306598	0.165954	7.00136e-77	6.12934e-72
FBgn0038577	CG12321	0.225904	0.571954	0.530755	0.425627	0.190584	1.30263e-88	1.14039e-83
FBgn0031495	GABPI	0.225794	1.13176	0.762207	0.296237	0.137301	1.96155e-63	1.71724e-58
FBgn0020236	ATPCL	0.225769	0.863615	0.662651	0.340706	0.156159	2.9243e-72	2.56007e-67
FBgn0035210	msd5	0.225746	0.959824	0.696259	0.324227	0.131218	1.32107e-60	1.15653e-55
FBgn0035909	ergic53	0.225702	2.26484	0.945466	0.238721	0.141657	1.82665e-65	1.59914e-60
FBgn0002622	RpS3	0.22569	32.1576	1	0.22569	0.0303679	6.51394e-15	5.70263e-10
FBgn0031896	CG4502	0.22558	1.26494	0.78884	0.285965	0.114019	1.17074e-52	1.02492e-47
FBgn0031947	CG7154	0.225541	2.93825	0.946734	0.238231	0.119444	3.70903e-55	3.24707e-50
FBgn0036340	SRm160	0.225313	1.34203	0.805327	0.279779	0.162287	3.78629e-75	3.31471e-70
FBgn0030518	CG11134	0.225289	1.02115	0.740013	0.304439	0.133502	1.14895e-61	1.00585e-56
FBgn0267330	KdelR	0.225173	3.23623	0.977806	0.230284	0.129669	6.91508e-60	6.0538e-55
FBgn0032906	RPA2	0.225019	1.3158	0.809765	0.277882	0.12808	3.76927e-59	3.29981e-54
FBgn0034936	Stoml2	0.225015	1.46652	0.840203	0.26781	0.117183	4.09049e-54	3.58102e-49
FBgn0284421	Psn	0.22499	1.71894	0.880152	0.255627	0.145575	2.69895e-67	2.3628e-62
FBgn0026084	cib	0.224917	9.51041	0.996195	0.225776	0.128622	2.11559e-59	1.8521e-54
FBgn0033089	CG17266	0.224873	1.44786	0.826886	0.271952	0.12629	2.54547e-58	2.22843e-53
FBgn0027088	GlyRS	0.224803	1.42638	0.838935	0.267962	0.128543	2.29995e-59	2.01349e-54
FBgn0037374	jagn	0.224788	1.32919	0.809765	0.277596	0.128647	2.05978e-59	1.80324e-54
FBgn0039674	CG1907	0.224761	1.06623	0.736842	0.305033	0.148565	1.07508e-68	9.41181e-64
FBgn0039120	Nup98-96	0.224688	0.907878	0.69499	0.323297	0.134222	5.31305e-62	4.65131e-57
FBgn0034858	eIF2Bdelta	0.224484	0.83983	0.664553	0.337797	0.148752	8.78107e-69	7.68739e-64
FBgn0030718	ND-20	0.224376	3.2794	0.970831	0.231118	0.113712	1.62124e-52	1.41932e-47
FBgn0039349	Ssadh	0.224353	0.645634	0.583386	0.38457	0.176885	4.56355e-82	3.99516e-77
FBgn0032597	CG17904	0.224339	1.24785	0.790108	0.283935	0.127037	1.14764e-58	1.0047e-53
FBgn0030000	CG2260	0.224307	0.966601	0.707039	0.317249	0.137441	1.68835e-63	1.47807e-58
FBgn0050392	CG30392	0.224295	0.835036	0.667724	0.33591	0.176614	6.13972e-82	5.37501e-77
FBgn0051694	CG31694	0.224151	2.45931	0.904883	0.247712	0.110005	8.19097e-51	7.17079e-46
FBgn0265298	SC35	0.22412	8.26935	0.996829	0.224832	0.122025	2.38788e-56	2.09047e-51
FBgn0031772	CG13994	0.224067	1.66091	0.868104	0.258111	0.107689	9.45558e-50	8.27789e-45
FBgn0025839	ND-B14.5A	0.223891	2.15653	0.930247	0.240679	0.102854	1.54935e-47	1.35638e-42
FBgn0026409	Mpcp2	0.223808	3.71748	0.985415	0.22712	0.100891	1.22356e-46	1.07117e-41
FBgn0010288	Uch	0.223726	1.8116	0.876347	0.255294	0.134808	2.83915e-62	2.48553e-57
FBgn0036964	FRG1	0.223705	1.57221	0.859226	0.260356	0.179175	3.70351e-83	3.24224e-78
FBgn0027093	ArgRS	0.223611	1.03884	0.710843	0.314571	0.140981	3.77969e-65	3.30893e-60
FBgn0054008	CG34008	0.223474	0.840305	0.644895	0.346527	0.124349	2.01351e-57	1.76273e-52
FBgn0020248	stet	0.223385	0.626573	0.5409	0.412987	0.171594	1.49045e-79	1.30482e-74
FBgn0051363	Jupiter	0.223344	19.9918	1	0.223344	0.0930847	4.44562e-43	3.89192e-38
FBgn0285950	RpL19	0.22324	64.4216	1	0.22324	0.0186348	1.08987e-09	9.54124e-05
FBgn0038252	BigH1	0.223075	4.12857	0.920736	0.242279	0.132662	2.8208e-61	2.46947e-56
FBgn0038893	Archease	0.223042	1.00362	0.712112	0.313212	0.137039	2.59866e-63	2.275e-58
FBgn0032925	CG9246	0.222959	1.11571	0.772353	0.288675	0.123004	8.4283e-57	7.37855e-52
FBgn0011224	heph	0.222738	1.59268	0.85986	0.25904	0.146963	6.04447e-68	5.29163e-63
FBgn0036549	CG10516	0.222722	0.928815	0.696259	0.319884	0.152069	2.44438e-70	2.13993e-65
FBgn0027080	TyrRS	0.222636	1.84215	0.896005	0.248476	0.138127	8.09274e-64	7.08479e-59
FBgn0030876	CG6762	0.222447	0.464907	0.447685	0.496883	0.158462	2.4097e-73	2.10957e-68
FBgn0263740	eIF2gamma	0.222403	2.42643	0.940393	0.2365	0.150604	1.18956e-69	1.0414e-64
FBgn0032016	Mettl14	0.22237	1.16422	0.755231	0.294439	0.12473	1.34174e-57	1.17463e-52
FBgn0040227	eIF3d1	0.222216	5.13208	0.996829	0.222922	0.0878137	1.10712e-40	9.69231e-36
FBgn0051717	CG31717	0.222191	1.41804	0.831959	0.267069	0.129531	8.01507e-60	7.0168e-55
FBgn0003346	RanGAP	0.222162	2.20198	0.911224	0.243806	0.171216	2.25256e-79	1.972e-74
FBgn0031909	CG5181	0.222082	1.15703	0.76728	0.289441	0.133064	1.83543e-61	1.60683e-56
FBgn0036762	CG7430	0.221929	1.81839	0.888396	0.249809	0.116942	5.28243e-54	4.62451e-49
FBgn0050493	Coq9	0.221919	0.647696	0.573874	0.386704	0.186779	8.66772e-87	7.58815e-82
FBgn0037810	sle	0.221845	0.945939	0.69499	0.319205	0.144503	8.55872e-67	7.49273e-62
FBgn0032524	Hacd2	0.221724	1.08342	0.743183	0.298343	0.180434	9.30292e-84	8.14424e-79
FBgn0015379	dod	0.221717	3.4983	0.974635	0.227487	0.104967	1.67128e-48	1.46313e-43
FBgn0001197	His2Av	0.22171	33.7837	1	0.22171	0.079413	7.09181e-37	6.20852e-32
FBgn0030789	Rrp45	0.221559	0.782031	0.613824	0.360948	0.165025	1.92496e-76	1.6852e-71
FBgn0086785	Vps36	0.221517	0.786831	0.646164	0.342819	0.165495	1.15405e-76	1.01031e-71
FBgn0011509	SrpRbeta	0.221504	1.31803	0.82435	0.268702	0.101386	7.26429e-47	6.35953e-42
FBgn0265630	sno	0.221371	1.40151	0.793912	0.278835	0.147455	3.55634e-68	3.1134e-63
FBgn0010078	RpL23	0.221311	62.0702	1	0.221311	0.00857583	3.63143e-05	1
FBgn0003169	put	0.221301	1.4558	0.828789	0.267018	0.133311	1.40928e-61	1.23375e-56
FBgn0033899	CG13016	0.221249	1.03333	0.729233	0.3034	0.141013	3.65286e-65	3.1979e-60
FBgn0038809	CG16953	0.221207	1.09107	0.751427	0.294383	0.150489	1.34664e-69	1.17892e-64
FBgn0086908	egg	0.221177	0.75238	0.611921	0.361447	0.150629	1.15827e-69	1.01401e-64
FBgn0259196	CG42300	0.221167	0.489801	0.46227	0.478437	0.152736	1.18774e-70	1.03981e-65
FBgn0034938	CG3803	0.221154	0.772104	0.630945	0.350512	0.166549	3.66183e-77	3.20575e-72
FBgn0031698	Ncoa6	0.221128	2.28562	0.93215	0.237224	0.156557	1.90065e-72	1.66392e-67
FBgn0014868	Ost48	0.221122	3.80359	0.989854	0.223388	0.118782	7.49521e-55	6.56168e-50
FBgn0039136	CG5902	0.221109	2.25104	0.933418	0.236881	0.123544	4.73973e-57	4.1494e-52
FBgn0030719	eIF5	0.22095	1.34837	0.809765	0.272857	0.112254	7.58924e-52	6.644e-47
FBgn0004907	14-3-3zeta	0.220865	15.1911	1	0.220865	0.0435751	8.59503e-21	7.52452e-16
FBgn0032919	CG9253	0.22085	1.35315	0.806595	0.273806	0.128653	2.04671e-59	1.7918e-54
FBgn0031231	mRpL10	0.220828	0.938705	0.700698	0.315154	0.111496	1.69176e-51	1.48106e-46
FBgn0032521	CG7110	0.220828	0.825689	0.658846	0.335174	0.126569	1.889e-58	1.65373e-53
FBgn0032030	Wdr82	0.220782	1.61504	0.837666	0.263568	0.108315	4.8826e-50	4.27447e-45
FBgn0037134	CG7407	0.220779	1.43009	0.831959	0.265372	0.121869	2.81913e-56	2.46801e-51
FBgn0028662	VhaPPA1-1	0.22075	1.50977	0.850349	0.259599	0.126785	1.5011e-58	1.31414e-53
FBgn0250843	Prosalpha6	0.220701	2.98513	0.946734	0.233118	0.106215	4.48147e-49	3.92331e-44
FBgn0004404	RpS14b	0.220512	4.73488	0.991122	0.222487	0.0754874	4.21126e-35	3.68674e-30
FBgn0035421	CG12034	0.220506	1.03994	0.749524	0.294194	0.12888	1.60517e-59	1.40524e-54
FBgn0003062	Fib	0.220395	3.04212	0.954978	0.230785	0.105145	1.38608e-48	1.21344e-43
FBgn0005585	Calr	0.220351	22.4119	1	0.220351	0.0901203	9.91617e-42	8.68111e-37
FBgn0000064	Ald1	0.220331	2.91792	0.9461	0.232883	0.121064	6.63323e-56	5.80706e-51
FBgn0039019	HP1c	0.220306	1.66764	0.869372	0.253408	0.130023	4.73632e-60	4.14641e-55
FBgn0011760	ctp	0.220289	19.8947	1	0.220289	0.0622693	3.74758e-29	3.28082e-24
FBgn0039698	CG7789	0.220264	0.990362	0.704502	0.312652	0.113008	3.41524e-52	2.98988e-47
FBgn0039835	mRpL32	0.220252	1.36488	0.811668	0.271357	0.101508	6.39411e-47	5.59772e-42
FBgn0037328	z	0.220181	39.1648	1	0.220181	0.012797	4.47492e-07	0.0391757
FBgn0035827	Srp9	0.220135	2.30689	0.932784	0.235997	0.0895585	1.78508e-41	1.56275e-36
FBgn0284248	Cyt-c-p	0.220129	5.84391	0.997464	0.220689	0.149142	5.76354e-69	5.04569e-64
FBgn0032732	CG15168	0.220119	2.62275	0.943564	0.233285	0.0817948	5.92984e-38	5.19128e-33
FBgn0032635	CG15141	0.22009	1.16239	0.763475	0.288275	0.142907	4.76811e-66	4.17424e-61
FBgn0019830	colt	0.220072	1.37263	0.819277	0.268618	0.095827	2.50495e-44	2.19296e-39
FBgn0003371	sgg	0.220071	2.08237	0.911858	0.241343	0.11031	5.93035e-51	5.19172e-46
FBgn0062928	hpRNA:CR33940	0.220043	1.05518	0.699429	0.314603	0.162321	3.64822e-75	3.19384e-70
FBgn0010638	Sec61beta	0.219937	4.86593	0.996829	0.220636	0.130405	3.14929e-60	2.75705e-55
FBgn0037351	RpL13A	0.219883	78.1004	1	0.219883	0.00681908	0.000231672	1
FBgn0011272	RpL13	0.219824	48.5206	1	0.219824	0.00826614	5.02752e-05	1
FBgn0036211	CG5946	0.219819	0.969341	0.718453	0.305962	0.122998	8.48205e-57	7.42561e-52
FBgn0038272	CG7265	0.219793	1.30189	0.812936	0.27037	0.146318	1.21234e-67	1.06135e-62
FBgn0034503	MED8	0.21976	1.40038	0.81357	0.270118	0.129604	7.41141e-60	6.48832e-55
FBgn0035243	CG13926	0.219717	1.24647	0.798985	0.274995	0.138749	4.15261e-64	3.6354e-59
FBgn0032350	CG6287	0.219624	2.01962	0.824984	0.266216	0.105373	1.08975e-48	9.54025e-44
FBgn0035959	CG4911	0.219593	1.059	0.732403	0.299825	0.124985	1.02204e-57	8.94744e-53
FBgn0035540	Syx17	0.219582	1.07968	0.757134	0.290017	0.189849	2.93456e-88	2.56906e-83
FBgn0034876	wmd	0.219524	2.28583	0.937223	0.234228	0.138756	4.12038e-64	3.60718e-59
FBgn0000316	cin	0.219419	1.02689	0.715282	0.306759	0.110052	7.79133e-51	6.82092e-46
FBgn0010339	128up	0.219316	1.36625	0.817375	0.268317	0.106879	2.22444e-49	1.94739e-44
FBgn0050094	CG30094	0.219288	1.07502	0.743183	0.295066	0.14481	6.15204e-67	5.3858e-62
FBgn0033434	CG1902	0.219239	0.845302	0.657578	0.333405	0.123795	3.63014e-57	3.17801e-52
FBgn0035715	CG10103	0.219155	1.12399	0.741915	0.295391	0.116201	1.15886e-53	1.01452e-48
FBgn0031886	Nuf2	0.219146	1.5149	0.82435	0.26584	0.124858	1.17052e-57	1.02473e-52
FBgn0260750	Mulk	0.219131	0.877518	0.674065	0.325089	0.15899	1.35896e-73	1.1897e-68
FBgn0035165	CG13887	0.218956	2.94781	0.948637	0.230812	0.078923	1.18119e-36	1.03407e-31
FBgn0031030	Tao	0.218937	7.37102	0.995561	0.219914	0.165447	1.21587e-76	1.06443e-71
FBgn0031020	Naa15-16	0.218896	1.13868	0.74889	0.292294	0.143557	2.36981e-66	2.07465e-61
FBgn0037481	MAGE	0.21887	1.14539	0.741281	0.295259	0.103372	8.98294e-48	7.86412e-43
FBgn0034237	eIF3b	0.218867	3.06273	0.975269	0.224417	0.0846619	2.97942e-39	2.60833e-34
FBgn0026083	tyf	0.218814	1.64804	0.86747	0.252243	0.131036	1.60565e-60	1.40567e-55
FBgn0014020	Rho1	0.218807	6.10126	0.998098	0.219224	0.0911755	3.28547e-42	2.87627e-37
FBgn0050291	CG30291	0.218764	0.972203	0.708307	0.308855	0.139127	2.76659e-64	2.42201e-59
FBgn0036052	CG10809	0.218714	1.23984	0.794547	0.275269	0.156246	2.66096e-72	2.32953e-67
FBgn0030552	mRpL38	0.218629	0.794889	0.638554	0.342381	0.13973	1.44841e-64	1.26801e-59
FBgn0034496	CG9143	0.218608	0.894284	0.674699	0.324008	0.139348	2.18365e-64	1.91167e-59
FBgn0034743	RpS16	0.218583	46.4126	1	0.218583	0.0088669	2.67602e-05	1
FBgn0028969	deltaCOP	0.218583	1.54286	0.829423	0.263536	0.114171	9.96608e-53	8.72481e-48
FBgn0033160	Dhx15	0.218499	1.16524	0.783767	0.278781	0.138599	4.875e-64	4.26782e-59
FBgn0036745	CG7484	0.218413	2.03142	0.905517	0.241202	0.121439	4.45454e-56	3.89973e-51
FBgn0031059	CG14229	0.218401	1.57103	0.831325	0.262714	0.107217	1.55739e-49	1.36342e-44
FBgn0031848	Nse1	0.218345	1.42133	0.804058	0.271554	0.113113	3.0582e-52	2.6773e-47
FBgn0051044	lncRNA:CR31044	0.218304	1.28194	0.773621	0.282185	0.164271	4.37372e-76	3.82897e-71
FBgn0037149	CG14561	0.218265	1.90346	0.880152	0.247985	0.0961147	1.85206e-44	1.62138e-39
FBgn0023143	Uba1	0.218152	1.32378	0.800888	0.272388	0.136846	3.19582e-63	2.79778e-58
FBgn0020496	CtBP	0.218087	8.75639	0.999366	0.218226	0.0881128	8.09791e-41	7.08932e-36
FBgn0261602	RpL8	0.218073	33.8298	1	0.218073	0.0135792	1.99221e-07	0.0174408
FBgn0003279	RpL4	0.218011	25.4949	1	0.218011	0.0164245	1.05846e-08	0.000926628
FBgn0038360	CG9590	0.217938	0.72618	0.625872	0.348215	0.147898	2.20749e-68	1.93255e-63
FBgn0042125	CG18787	0.217521	1.26704	0.789474	0.275527	0.109666	1.17134e-50	1.02545e-45
FBgn0014022	Rlb1	0.217432	1.34234	0.830691	0.261748	0.137307	1.95012e-63	1.70723e-58
FBgn0029878	Pat1	0.217346	1.76597	0.842105	0.258099	0.147846	2.33455e-68	2.04378e-63
FBgn0024983	CG4293	0.217269	1.19386	0.759036	0.286244	0.137587	1.44459e-63	1.26467e-58
FBgn0031711	CG6907	0.217225	1.12384	0.757134	0.286905	0.120424	1.30985e-55	1.14671e-50
FBgn0261067	LSm1	0.217214	1.39428	0.82435	0.263498	0.164604	3.04465e-76	2.66544e-71
FBgn0015756	RpL9	0.217208	24.7248	1	0.217208	0.0187152	1.00339e-09	8.78417e-05
FBgn0030944	CG6617	0.21717	1.84636	0.87825	0.247276	0.141925	1.37022e-65	1.19956e-60
FBgn0032487	Ski6	0.217109	1.03212	0.746354	0.290893	0.143155	3.65058e-66	3.1959e-61
FBgn0035721	CG9948	0.217098	1.11137	0.765377	0.283649	0.125857	4.03753e-58	3.53466e-53
FBgn0021872	Xbp1	0.217068	2.07464	0.90298	0.240391	0.117829	2.0611e-54	1.80439e-49
FBgn0014455	Ahcy	0.217013	1.72621	0.875079	0.247992	0.116531	8.17436e-54	7.15624e-49
FBgn0001105	Gbeta13F	0.216978	10.9648	1	0.216978	0.0708337	5.2841e-33	4.62596e-28
FBgn0027091	CysRS	0.216969	0.62925	0.564997	0.384018	0.148082	1.81024e-68	1.58478e-63
FBgn0031759	lid	0.216927	1.49751	0.852251	0.254534	0.152419	1.67378e-70	1.46531e-65
FBgn0051635	CG31635	0.216837	1.22696	0.775523	0.279601	0.117108	4.43018e-54	3.8784e-49
FBgn0034086	CG8441	0.216696	1.50409	0.848446	0.255403	0.104242	3.59007e-48	3.14292e-43
FBgn0262619	DNAlig1	0.216693	0.869441	0.660114	0.328267	0.134929	2.49236e-62	2.18193e-57
FBgn0027932	Akap200	0.216676	5.71095	0.996829	0.217365	0.0930302	4.7069e-43	4.12065e-38
FBgn0034802	CNBP	0.216589	26.1279	1	0.216589	0.0315765	1.88911e-15	1.65382e-10
FBgn0035529	Fdx2	0.216558	1.096	0.765377	0.282943	0.151211	6.17361e-70	5.40468e-65
FBgn0035355	CG16985	0.21646	0.899793	0.689918	0.313748	0.117854	2.00793e-54	1.75785e-49
FBgn0037235	CG1103	0.216445	1.88883	0.866836	0.249696	0.0939884	1.72372e-43	1.50903e-38
FBgn0002183	dre4	0.216335	1.20288	0.791376	0.273366	0.139658	1.5649e-64	1.36999e-59
FBgn0278608	Dsp1	0.216262	12.0878	0.999366	0.216399	0.111328	2.02105e-51	1.76933e-46
FBgn0016726	RpL29	0.216242	61.1029	1	0.216242	0.00435539	0.00326685	1
FBgn0284243	betaTub56D	0.216231	48.6244	1	0.216231	0.0474287	1.64162e-22	1.43716e-17
FBgn0011604	Iswi	0.216226	1.23142	0.795815	0.271704	0.130336	3.39065e-60	2.96835e-55
FBgn0031980	RpL36A	0.216156	40.7977	1	0.216156	0.013622	1.90608e-07	0.0166868
FBgn0032293	Dpy-30L1	0.216153	1.63607	0.868104	0.248995	0.111512	1.66332e-51	1.45615e-46
FBgn0010409	RpL18A	0.216059	64.8036	1	0.216059	0.00585728	0.000645411	1
FBgn0005593	RpL7	0.21599	61.2376	1	0.21599	0.00725137	0.000146556	1
FBgn0086710	RpL30	0.215856	36.6472	1	0.215856	0.00835058	4.60055e-05	1
FBgn0030276	Dlic	0.21573	1.23153	0.785035	0.274803	0.152214	2.08984e-70	1.82955e-65
FBgn0039341	CG5112	0.215711	0.809615	0.646164	0.333834	0.114154	1.01495e-52	8.88536e-48
FBgn0261618	larp	0.215679	0.965466	0.706405	0.30532	0.128337	2.867e-59	2.50992e-54
FBgn0035947	Srp68	0.215599	1.06276	0.734306	0.29361	0.118631	8.80193e-55	7.70565e-50
FBgn0028473	Non1	0.21559	7.19656	1	0.21559	0.0648296	2.65476e-30	2.32411e-25
FBgn0086446	DCTN6-p27	0.215575	1.12859	0.772353	0.279115	0.131635	8.45942e-61	7.4058e-56
FBgn0003612	Su(var)2-10	0.215535	1.8295	0.883957	0.24383	0.129869	5.58658e-60	4.89077e-55
FBgn0014877	Roe1	0.215377	0.897989	0.689918	0.312178	0.142223	9.94627e-66	8.70746e-61
FBgn0026089	CG14817	0.215298	1.40475	0.826252	0.260572	0.124722	1.3533e-57	1.18475e-52
FBgn0022027	Vps25	0.215293	1.52046	0.855422	0.251681	0.132269	4.29431e-61	3.75946e-56
FBgn0038834	RpS30	0.215245	32.5784	1	0.215245	0.00501247	0.00160054	1
FBgn0029755	Sas10	0.215151	1.43846	0.82435	0.260995	0.112868	3.96112e-52	3.46776e-47
FBgn0037135	CG7414	0.215083	3.3333	0.984147	0.218548	0.0602926	2.88763e-28	2.52798e-23
FBgn0013325	RpL11	0.215067	36.2843	1	0.215067	0.00704278	0.000182761	1
FBgn0259722	CG42376	0.214918	0.770395	0.601141	0.357517	0.177271	2.99019e-82	2.61776e-77
FBgn0028743	Dhit	0.214795	1.49449	0.798985	0.268835	0.114279	8.89232e-53	7.78478e-48
FBgn0038396	CG5013	0.214755	1.19923	0.795815	0.269856	0.105593	8.64015e-49	7.56402e-44
FBgn0030328	Amun	0.214557	1.66288	0.868104	0.247156	0.136178	6.54278e-63	5.72788e-58
FBgn0000377	crn	0.214496	1.13071	0.757768	0.283062	0.124378	1.95157e-57	1.7085e-52
FBgn0019637	Atu	0.214459	1.57182	0.849081	0.252578	0.106087	5.13194e-49	4.49276e-44
FBgn0014002	Pdi	0.214428	4.80117	0.994927	0.215522	0.0929359	5.19607e-43	4.5489e-38
FBgn0037220	CG14641	0.214403	2.71999	0.950539	0.225559	0.107951	7.17096e-50	6.27781e-45
FBgn0030183	CG15309	0.214232	0.611294	0.537096	0.398871	0.159778	5.7769e-74	5.05739e-69
FBgn0025455	CycT	0.214153	1.1992	0.784401	0.273014	0.13629	5.80168e-63	5.07908e-58
FBgn0034265	Snx16	0.214085	1.06076	0.701332	0.305255	0.11185	1.16343e-51	1.01853e-46
FBgn0026250	eIF1A	0.214015	6.21502	0.997464	0.214559	0.0602339	3.06813e-28	2.686e-23
FBgn0033902	eIF3m	0.213961	5.7279	0.996195	0.214778	0.068972	3.64124e-32	3.18772e-27
FBgn0038319	mRpL9	0.213878	0.953821	0.714014	0.299543	0.119974	2.11395e-55	1.85066e-50
FBgn0035247	metl	0.21383	1.10175	0.757768	0.282184	0.0983797	1.71594e-45	1.50222e-40
FBgn0028690	Rpn5	0.213813	2.13405	0.909956	0.23497	0.0951837	4.91987e-44	4.3071e-39
FBgn0036771	Wdr92	0.213739	0.680471	0.589093	0.362827	0.150022	2.23104e-69	1.95316e-64
FBgn0010408	RpS9	0.213689	50.945	1	0.213689	0.00381438	0.00591403	1
FBgn0035249	CG17249	0.213668	0.89434	0.693088	0.308284	0.137187	2.21763e-63	1.94143e-58
FBgn0036196	CG11658	0.213657	0.606506	0.556753	0.383754	0.190066	2.30946e-88	2.02182e-83
FBgn0050077	Blos1	0.213559	1.00844	0.745086	0.286623	0.139093	2.87038e-64	2.51287e-59
FBgn0263352	Unr	0.213534	10.1831	1	0.213534	0.0665763	4.35489e-31	3.81248e-26
FBgn0035150	Rev1	0.213533	0.582597	0.544071	0.392473	0.141099	3.32874e-65	2.91414e-60
FBgn0014037	Su(Tpl)	0.213531	2.42249	0.934686	0.228452	0.0824391	3.02921e-38	2.65192e-33
FBgn0026372	RpL23A	0.213484	47.2161	1	0.213484	0.0076742	9.37666e-05	1
FBgn0259139	glo	0.213452	3.07398	0.970831	0.219865	0.135506	1.34384e-62	1.17647e-57
FBgn0010265	RpS13	0.213414	75.7188	1	0.213414	0.00342397	0.00911497	1
FBgn0038055	trus	0.213404	0.560801	0.532657	0.40064	0.140809	4.54358e-65	3.97768e-60
FBgn0020618	Rack1	0.213395	24.7167	1	0.213395	0.0175172	3.4382e-09	0.000300997
FBgn0037342	CG2931	0.213365	0.997573	0.729867	0.292334	0.123159	7.14054e-57	6.25119e-52
FBgn0285962	CG46338	0.213354	1.18515	0.772987	0.276013	0.13423	5.26647e-62	4.61053e-57
FBgn0023170	RpL39	0.213263	160.793	1	0.213263	0.00126093	0.11364	1
FBgn0035714	CG8549	0.213214	0.829891	0.667089	0.319618	0.147376	3.87309e-68	3.3907e-63
FBgn0038235	CG8461	0.213192	0.978167	0.703234	0.30316	0.114965	4.29986e-53	3.76431e-48
FBgn0038948	PSR	0.213139	1.96878	0.908687	0.234557	0.104572	2.53532e-48	2.21954e-43
FBgn0030053	CG12081	0.213102	1.00485	0.710209	0.300055	0.139749	1.41883e-64	1.24212e-59
FBgn0014366	noi	0.213096	1.07243	0.726696	0.293239	0.137538	1.52121e-63	1.33174e-58
FBgn0261792	snRNP-U1-C	0.213041	1.90211	0.891566	0.238952	0.117547	2.78156e-54	2.43512e-49
FBgn0017579	RpL14	0.213039	72.8787	1	0.213039	0.00139503	0.096098	1
FBgn0032214	CG4968	0.213037	1.75276	0.873811	0.243802	0.085856	8.56375e-40	7.49713e-35
FBgn0003514	sqh	0.213034	3.72853	0.988586	0.215494	0.0885117	5.33634e-41	4.6717e-36
FBgn0010750	atms	0.213021	1.14343	0.781864	0.272452	0.120767	9.09559e-56	7.96274e-51
FBgn0036405	CG6833	0.21302	0.879939	0.676601	0.314838	0.134875	2.64244e-62	2.31332e-57
FBgn0021944	Coprox	0.213005	0.908476	0.679138	0.31364	0.132747	2.577e-61	2.25604e-56
FBgn0031145	Ntf-2	0.212956	8.85925	0.999366	0.213092	0.0547247	9.01076e-26	7.88847e-21
FBgn0011291	Taf11	0.212943	1.65906	0.886493	0.240208	0.110537	4.66698e-51	4.08571e-46
FBgn0051988	CG31988	0.212916	0.447667	0.419784	0.507203	0.16947	1.51518e-78	1.32646e-73
FBgn0267385	PyK	0.212864	2.93327	0.884591	0.240635	0.109905	9.10412e-51	7.9702e-46
FBgn0030616	RpL37a	0.212806	62.4403	1	0.212806	0.00419347	0.00389936	1
FBgn0037478	CG2656	0.212769	1.10336	0.754597	0.281963	0.134343	4.66881e-62	4.08731e-57
FBgn0262114	RanBPM	0.212691	1.12143	0.7565	0.281152	0.129984	4.93818e-60	4.32313e-55
FBgn0028683	spt4	0.212646	3.12299	0.965758	0.220186	0.0927553	6.27816e-43	5.49622e-38
FBgn0040339	MED22	0.212594	2.95447	0.941661	0.225765	0.0921009	1.24636e-42	1.09113e-37
FBgn0033459	CG12744	0.212563	0.86139	0.664553	0.319858	0.173061	3.00015e-80	2.62649e-75
FBgn0032646	mEFTs	0.212551	0.970223	0.726696	0.29249	0.133437	1.23192e-61	1.07848e-56
FBgn0039359	RpL27	0.21251	39.9283	1	0.21251	0.00109054	0.141226	1
FBgn0004403	RpS14a	0.212483	21.905	1	0.212483	0.00757922	0.00010365	1
FBgn0037580	DppIII	0.212468	0.947233	0.691186	0.307396	0.124554	1.61739e-57	1.41595e-52
FBgn0261592	RpS6	0.212377	16.8763	0.999366	0.212512	0.0179988	2.09535e-09	0.000183437
FBgn0037141	DNApol-eta	0.212253	0.590815	0.522511	0.406217	0.159286	9.8503e-74	8.62344e-69
FBgn0027783	SMC2	0.212079	1.25145	0.790108	0.268418	0.133292	1.43851e-61	1.25934e-56
FBgn0038166	CG9588	0.212075	1.08289	0.744451	0.284874	0.168009	7.45619e-78	6.52752e-73
FBgn0034243	Ns2	0.212012	1.55359	0.857958	0.247113	0.107505	1.14836e-49	1.00533e-44
FBgn0003942	RpS27A	0.211991	63.4345	1	0.211991	0.000371203	0.390739	1
FBgn0029993	CG1571	0.211971	0.38088	0.391249	0.541781	0.156261	2.61784e-72	2.29179e-67
FBgn0010411	RpS18	0.211925	35.8022	1	0.211925	0.00379385	0.00604956	1
FBgn0262620	lncRNA:CR43144	0.211898	0.464123	0.454661	0.466057	0.162969	1.80331e-75	1.57871e-70
FBgn0015521	RpS21	0.21186	50.4473	1	0.21186	0.00439491	0.00312895	1
FBgn0003410	sina	0.211718	5.02976	0.993659	0.213069	0.0841494	5.08673e-39	4.45317e-34
FBgn0036671	CG9951	0.21164	0.992178	0.720355	0.2938	0.128603	2.15871e-59	1.88984e-54
FBgn0034923	Upf3	0.21161	0.917268	0.708941	0.298488	0.125195	8.16924e-58	7.15176e-53
FBgn0035102	CG7049	0.211582	0.875557	0.674699	0.313594	0.104678	2.26682e-48	1.98449e-43
FBgn0024733	RpL10	0.211514	80.0802	1	0.211514	0.00221801	0.0358612	1
FBgn0036545	GXIVsPLA2	0.2115	0.956148	0.714014	0.296212	0.125766	4.44935e-58	3.89519e-53
FBgn0040575	CG15922	0.211365	0.973007	0.71338	0.296286	0.115393	2.72942e-53	2.38947e-48
FBgn0032518	RpL24	0.211284	46.3276	1	0.211284	0.00209616	0.0413494	1
FBgn0259483	Mob4	0.211218	2.16599	0.92137	0.229243	0.143102	3.86405e-66	3.38278e-61
FBgn0031008	CG8010	0.211215	1.02839	0.72416	0.291669	0.115587	2.22357e-53	1.94662e-48
FBgn0036000	CG3434	0.211187	1.19238	0.796449	0.265161	0.148159	1.66502e-68	1.45764e-63
FBgn0035999	CG3552	0.211159	0.895312	0.678503	0.311212	0.134142	5.78951e-62	5.06843e-57
FBgn0029897	RpL17	0.211093	41.7044	1	0.211093	0.00362189	0.00731637	1
FBgn0029629	eIF3g1	0.210965	6.40538	0.996195	0.211771	0.047425	1.64788e-22	1.44264e-17
FBgn0286213	RpS12	0.210802	60.6106	1	0.210802	0.0017134	0.0651421	1
FBgn0004049	yrt	0.210736	1.78174	0.889664	0.236871	0.11894	6.3371e-55	5.54782e-50
FBgn0031050	Arp10	0.210541	0.910586	0.667724	0.315312	0.136614	4.09906e-63	3.58852e-58
FBgn0026181	Rok	0.21049	1.19355	0.772353	0.27253	0.109981	8.39631e-51	7.35055e-46
FBgn0039204	CG6607	0.210476	0.921395	0.700698	0.30038	0.16779	9.47017e-78	8.29066e-73
FBgn0010412	RpS19a	0.210468	33.7911	1	0.210468	0.00175375	0.062058	1
FBgn0039870	CG1896	0.210432	1.19344	0.771718	0.27268	0.110348	5.69571e-51	4.98631e-46
FBgn0003941	RpL40	0.210425	62.3446	1	0.210425	0.00129989	0.108207	1
FBgn0011586	e(r)	0.210406	1.23474	0.787571	0.267158	0.100057	2.94076e-46	2.57449e-41
FBgn0260027	CG42495	0.210324	0.603378	0.540266	0.389297	0.129004	1.40693e-59	1.2317e-54
FBgn0032987	RpL21	0.210265	65.3098	1	0.210265	0.000907053	0.17968	1
FBgn0029785	RpL35	0.210132	40.1523	1	0.210132	0.00398724	0.00488913	1
FBgn0029512	Aos1	0.21	2.52368	0.940393	0.22331	0.105437	1.01803e-48	8.91234e-44
FBgn0004903	Rb97D	0.209936	2.10301	0.914394	0.229591	0.119636	3.02707e-55	2.65005e-50
FBgn0035298	SCOT	0.209919	0.788278	0.625872	0.335403	0.120652	1.02752e-55	8.9954e-51
FBgn0020370	TppII	0.209905	1.09141	0.757134	0.277237	0.112783	4.33726e-52	3.79706e-47
FBgn0005533	RpS17	0.209877	33.1045	1	0.209877	0.00268698	0.020896	1
FBgn0265598	Bx	0.209876	0.989567	0.710209	0.295513	0.152277	1.95058e-70	1.70763e-65
FBgn0036258	eIF3l	0.209838	2.32959	0.941027	0.222989	0.0895335	1.83241e-41	1.60419e-36
FBgn0038057	CG12267	0.20981	0.620016	0.561826	0.373444	0.151214	6.15769e-70	5.39075e-65
FBgn0086472	RpS25	0.209777	97.2941	1	0.209777	6.63681e-05	0.716681	1
FBgn0003134	Pp1alpha-96A	0.209736	1.72835	0.871909	0.240548	0.0912045	3.18708e-42	2.79013e-37
FBgn0013981	His4r	0.209723	26.5476	1	0.209723	0.0277633	9.3827e-14	8.21408e-09
FBgn0261573	CoRest	0.209533	1.45629	0.828155	0.253012	0.165569	1.06467e-76	9.32068e-72
FBgn0037883	CG14701	0.209522	0.624207	0.552949	0.378918	0.137899	1.03368e-63	9.04938e-59
FBgn0260859	Bet3	0.209495	1.36717	0.796449	0.263036	0.0971214	6.43566e-45	5.6341e-40
FBgn0033912	RpS23	0.209448	39.6034	1	0.209448	0.00256685	0.0239709	1
FBgn0036974	eRF1	0.209411	2.37851	0.930881	0.224959	0.0717038	2.14255e-33	1.8757e-28
FBgn0033699	RpS11	0.209391	80.1811	1	0.209391	0.000725304	0.230224	1
FBgn0022288	l(2)09851	0.209358	1.08047	0.759036	0.27582	0.12075	9.26318e-56	8.10945e-51
FBgn0032818	CG10628	0.209315	0.965105	0.714648	0.292893	0.113549	1.9273e-52	1.68726e-47
FBgn0037901	Exd2	0.209306	0.903495	0.694356	0.301438	0.135139	1.99141e-62	1.74338e-57
FBgn0052446	Atox1	0.209152	1.04262	0.739379	0.282875	0.0995907	4.8045e-46	4.2061e-41
FBgn0266599	Hsc70-4	0.20914	28.1338	1	0.20914	0.0192551	5.76264e-10	5.0449e-05
FBgn0024330	MED6	0.209052	1.49038	0.831959	0.251277	0.0992068	7.19369e-46	6.29771e-41
FBgn0284442	Mcm3	0.209018	1.12885	0.742549	0.281487	0.104325	3.28864e-48	2.87904e-43
FBgn0030365	Tango4	0.208905	1.64764	0.839569	0.248825	0.0800061	3.8239e-37	3.34763e-32
FBgn0086856	CG11555	0.208876	1.76657	0.864299	0.24167	0.0910195	3.8683e-42	3.3865e-37
FBgn0014026	RpL7A	0.208777	36.5515	1	0.208777	0.00196838	0.0480625	1
FBgn0026777	Rad23	0.20876	4.82116	0.987952	0.211306	0.0740175	1.93974e-34	1.69815e-29
FBgn0003231	ref(2)P	0.208712	1.98333	0.872543	0.2392	0.0797528	4.97857e-37	4.35849e-32
FBgn0030686	mRpL3	0.20867	0.927866	0.665187	0.313701	0.138154	7.8598e-64	6.88086e-59
FBgn0004856	Bx42	0.208624	2.37174	0.934686	0.223202	0.11862	8.89737e-55	7.7892e-50
FBgn0030035	PIG-T	0.208616	2.39587	0.938491	0.222288	0.0965493	1.17356e-44	1.02739e-39
FBgn0051673	CG31673	0.208613	1.03307	0.729233	0.286072	0.100091	2.83883e-46	2.48525e-41
FBgn0036643	Syx8	0.208501	0.857982	0.67026	0.311074	0.12362	4.37533e-57	3.83038e-52
FBgn0028554	x16	0.208485	2.98857	0.959417	0.217304	0.102723	1.77945e-47	1.55782e-42
FBgn0011648	Mad	0.208443	1.78782	0.86747	0.240289	0.0968856	8.24397e-45	7.21718e-40
FBgn0039929	CG11076	0.208427	1.32472	0.808497	0.257796	0.10013	2.72455e-46	2.38521e-41
FBgn0030802	DENR	0.208426	2.01364	0.875079	0.238179	0.0813147	9.78139e-38	8.56312e-33
FBgn0033767	CG13148	0.20841	0.486537	0.467977	0.445342	0.167326	1.5701e-77	1.37454e-72
FBgn0025629	CG4045	0.208314	1.05648	0.725428	0.287161	0.0962009	1.69169e-44	1.48099e-39
FBgn0030136	RpS28b	0.20831	44.6469	1	0.20831	0.000239121	0.490919	1
FBgn0039713	RpS8	0.208292	47.6487	1	0.208292	0.000467632	0.335377	1
FBgn0033988	pcs	0.20827	5.75038	0.995561	0.209198	0.0859009	8.17062e-40	7.15297e-35
FBgn0000259	CkIIbeta	0.208254	2.69159	0.957514	0.217495	0.0795945	5.87067e-37	5.13948e-32
FBgn0039360	CLS	0.208238	0.762998	0.622701	0.33441	0.152559	1.43862e-70	1.25944e-65
FBgn0038326	CG5044	0.20819	0.611613	0.544705	0.382206	0.147366	3.91799e-68	3.43001e-63
FBgn0031817	HemK1	0.208147	0.484975	0.475587	0.437663	0.172693	4.48469e-80	3.92612e-75
FBgn0039757	RpS7	0.208075	77.3869	1	0.208075	0.000355934	0.400663	1
FBgn0261881	l(2)35Be	0.207995	0.972521	0.711477	0.292343	0.124655	1.45296e-57	1.272e-52
FBgn0010622	DCTN3-p24	0.207913	0.928578	0.689918	0.301359	0.115213	3.30637e-53	2.89456e-48
FBgn0039857	RpL6	0.207784	53.4698	1	0.207784	0.00029945	0.440785	1
FBgn0037686	RpL34b	0.207736	45.7574	1	0.207736	0.000599753	0.275277	1
FBgn0030060	CG2004	0.207686	1.39225	0.785035	0.264556	0.0861258	6.46023e-40	5.65561e-35
FBgn0013799	Deaf1	0.207646	1.45491	0.852885	0.243464	0.139761	1.40148e-64	1.22693e-59
FBgn0261268	Cul3	0.207643	0.833825	0.671528	0.309209	0.142926	4.67021e-66	4.08854e-61
FBgn0052598	betaNACtes6	0.207499	0.545584	0.407736	0.508905	0.152774	1.14e-70	9.98017e-66
FBgn0036967	SCCRO4	0.207402	1.68709	0.859226	0.241382	0.112497	5.87048e-52	5.13931e-47
FBgn0037341	CG12746	0.207401	0.655317	0.577045	0.359419	0.123235	6.58622e-57	5.76591e-52
FBgn0037656	CG11986	0.207349	0.846211	0.668992	0.309942	0.11543	2.62706e-53	2.29986e-48
FBgn0038274	Nup93-2	0.207345	0.919584	0.694356	0.298615	0.140431	6.8259e-65	5.97573e-60
FBgn0019936	RpS20	0.207314	84.6477	1	0.207314	6.47118e-05	0.720088	1
FBgn0030318	rho-4	0.207237	1.39333	0.820545	0.25256	0.114579	6.47029e-53	5.66441e-48
FBgn0052202	CG32202	0.20721	1.89694	0.889664	0.232908	0.104957	1.68935e-48	1.47894e-43
FBgn0039726	eIF2Balpha	0.207187	1.11005	0.753963	0.274797	0.155112	9.08846e-72	7.9565e-67
FBgn0039626	Slu7	0.207179	1.01716	0.741915	0.279249	0.122656	1.22017e-56	1.0682e-51
FBgn0283494	Adk2	0.207148	2.30746	0.950539	0.217927	0.0764161	1.60364e-35	1.40391e-30
FBgn0020910	RpL3	0.207108	32.793	1	0.207108	0.000655468	0.254058	1
FBgn0264922	smt3	0.207041	61.3831	1	0.207041	0.0463543	4.95135e-22	4.33466e-17
FBgn0003687	Tbp	0.206989	1.24876	0.753329	0.274766	0.101386	7.27146e-47	6.3658e-42
FBgn0037885	CG17721	0.206953	0.75281	0.628408	0.329329	0.121134	6.15781e-56	5.39086e-51
FBgn0010198	RpS15Aa	0.206878	30.1254	1	0.206878	0.000158564	0.574842	1
FBgn0032052	PIG-U	0.206841	1.08907	0.74889	0.276197	0.136435	4.9638e-63	4.34556e-58
FBgn0025463	Bap60	0.206814	3.30758	0.952441	0.217141	0.0847395	2.74754e-39	2.40533e-34
FBgn0033178	CG11127	0.206747	0.939864	0.687381	0.300775	0.131121	1.46511e-60	1.28263e-55
FBgn0264895	RapGAP1	0.20674	9.4474	0.998098	0.207134	0.118658	8.54824e-55	7.48355e-50
FBgn0039977	CG17454	0.20672	2.77175	0.9461	0.218497	0.0849063	2.30849e-39	2.02097e-34
FBgn0035206	CG9186	0.206671	0.831648	0.649968	0.31797	0.114371	8.0689e-53	7.06392e-48
FBgn0053303	CG33303	0.206607	2.40056	0.942295	0.219259	0.108294	4.99166e-50	4.36995e-45
FBgn0000479	dnc	0.206582	2.20455	0.909956	0.227024	0.124989	1.01803e-57	8.91239e-53
FBgn0034138	RpS15	0.206547	82.6093	1	0.206547	4.1778e-05	0.773405	1
FBgn0036994	CG5199	0.206534	1.16395	0.743183	0.277905	0.100883	1.2335e-46	1.07987e-41
FBgn0040670	e(y)2b	0.206524	0.511175	0.427394	0.483217	0.159714	6.19006e-74	5.41909e-69
FBgn0260970	Ubr3	0.206376	2.08519	0.923906	0.223374	0.0902287	8.85213e-42	7.7496e-37
FBgn0017581	Lk6	0.206287	5.7056	0.994927	0.207339	0.0752342	5.47925e-35	4.79681e-30
FBgn0033544	CG7220	0.206252	1.64795	0.860495	0.23969	0.0874256	1.66118e-40	1.45428e-35
FBgn0037756	CG8507	0.206237	1.71206	0.85669	0.240737	0.109569	1.29877e-50	1.13701e-45
FBgn0040338	TfIIA-S-2	0.206208	0.764075	0.454027	0.454177	0.190708	1.13679e-88	9.95201e-84
FBgn0264357	SNF4Agamma	0.206164	1.27638	0.783767	0.263043	0.0807461	1.76888e-37	1.54857e-32
FBgn0051344	CG31344	0.206162	0.657201	0.57324	0.359644	0.136533	4.46959e-63	3.9129e-58
FBgn0004921	Ggamma1	0.206146	4.80941	0.994927	0.207197	0.0802511	2.9628e-37	2.59378e-32
FBgn0011284	RpS4	0.206034	51.5657	1	0.206034	1.22717e-05	0.875996	1
FBgn0037108	Alg11	0.206024	1.50778	0.852251	0.241741	0.127401	7.78299e-59	6.81362e-54
FBgn0033273	Gasz	0.205944	0.840341	0.650602	0.316544	0.122682	1.18695e-56	1.03912e-51
FBgn0261596	RpS24	0.205898	46.8131	1	0.205898	0.000924914	0.175453	1
FBgn0039182	CG5728	0.205894	0.656846	0.569436	0.361576	0.131737	7.59057e-61	6.64517e-56
FBgn0017577	Mcm5	0.205794	1.37482	0.789474	0.260672	0.093704	2.32273e-43	2.03343e-38
FBgn0024188	san	0.205643	2.17839	0.891566	0.230653	0.0849519	2.20121e-39	1.92705e-34
FBgn0032290	CG6443	0.205548	1.37071	0.812302	0.253044	0.123407	5.48494e-57	4.80179e-52
FBgn0026401	Nipped-B	0.205472	3.84111	0.986684	0.208245	0.0851701	1.75275e-39	1.53444e-34
FBgn0066084	RpL41	0.205355	127.199	1	0.205355	0.000159656	0.573528	1
FBgn0036213	RpL10Ab	0.205235	50.8938	1	0.205235	2.64467e-06	0.942251	1
FBgn0064225	RpL5	0.20518	43.2432	1	0.20518	0.00115337	0.130269	1
FBgn0011837	Tis11	0.205165	5.59452	0.992391	0.206739	0.0434646	9.62732e-21	8.42823e-16
FBgn0002626	RpL32	0.205066	43.6292	1	0.205066	0.000220399	0.508401	1
FBgn0052831	CG33695	0.204912	1.47561	0.818643	0.250307	0.111072	2.64886e-51	2.31894e-46
FBgn0014189	Hel25E	0.204894	9.32583	1	0.204894	0.064482	3.80355e-30	3.32982e-25
FBgn0000057	adp	0.204839	0.643193	0.579581	0.353426	0.108302	4.95131e-50	4.33463e-45
FBgn0035035	Samtor	0.204826	0.700497	0.59163	0.346207	0.133844	7.96328e-62	6.97145e-57
FBgn0003250	Rh4	0.204788	0.60639	0.527584	0.388161	0.175642	1.78056e-81	1.55879e-76
FBgn0285948	RpL27A	0.204612	103.053	1	0.204612	0.0013905	0.0966396	1
FBgn0027499	wde	0.204505	2.4541	0.91059	0.224586	0.0965078	1.22584e-44	1.07317e-39
FBgn0011746	ana	0.204498	0.81308	0.446417	0.458088	0.129709	6.62443e-60	5.79936e-55
FBgn0035213	CG2199	0.204458	1.14002	0.763475	0.267799	0.145203	4.02922e-67	3.52738e-62
FBgn0052207	hpRNA:CR32207	0.204427	1.1805	0.746988	0.273668	0.0866979	3.55383e-40	3.1112e-35
FBgn0032261	CG6094	0.204338	0.746082	0.62397	0.32748	0.159577	7.18162e-74	6.28715e-69
FBgn0002174	CG5504	0.20431	0.908302	0.684211	0.298606	0.0952258	4.70748e-44	4.12117e-39
FBgn0002924	ncd	0.204293	1.8385	0.864299	0.236369	0.115216	3.29386e-53	2.88361e-48
FBgn0259238	CG42336	0.204257	1.97827	0.916297	0.222916	0.0930055	4.83041e-43	4.22879e-38
FBgn0032642	CG5110	0.204196	0.847549	0.682308	0.299272	0.14515	4.26305e-67	3.73209e-62
FBgn0035372	CG12093	0.204108	0.816014	0.641091	0.318376	0.142147	1.07906e-65	9.44662e-61
FBgn0002638	Rcc1	0.203959	2.75859	0.943564	0.216158	0.101768	4.86291e-47	4.25724e-42
FBgn0002413	dco	0.203892	2.20379	0.91059	0.223912	0.0864443	4.63171e-40	4.05483e-35
FBgn0039300	RpS27	0.203882	71.5009	1	0.203882	3.97898e-05	0.778719	1
FBgn0035402	Usp5	0.203846	1.0515	0.735574	0.277125	0.14185	1.48486e-65	1.29992e-60
FBgn0030674	CG8184	0.20381	0.85063	0.660748	0.308454	0.136378	5.27916e-63	4.62164e-58
FBgn0003545	sub	0.203754	1.05929	0.717185	0.284103	0.103523	7.65531e-48	6.70184e-43
FBgn0086605	CG9853	0.203747	1.24215	0.801522	0.254201	0.101406	7.11819e-47	6.23162e-42
FBgn0261599	RpS29	0.203741	59.9727	1	0.203741	4.97125e-05	0.753462	1
FBgn0005649	Rox8	0.203711	3.33049	0.942295	0.216186	0.0637954	7.73738e-30	6.77369e-25
FBgn0267972	Der-1	0.203603	1.49096	0.840837	0.242143	0.11416	1.00834e-52	8.82749e-48
FBgn0038515	CG5823	0.203574	0.751741	0.611921	0.33268	0.110071	7.63801e-51	6.6867e-46
FBgn0032723	ssp3	0.203385	0.902374	0.667724	0.304595	0.123849	3.42819e-57	3.00121e-52
FBgn0032298	CG6724	0.203362	0.923439	0.676601	0.300564	0.140263	8.17344e-65	7.15544e-60
FBgn0033762	ZnT49B	0.203272	0.598838	0.536462	0.378912	0.115844	1.69369e-53	1.48274e-48
FBgn0015271	Orc5	0.202823	0.846444	0.658212	0.308142	0.110604	4.34533e-51	3.80412e-46
FBgn0266557	kis	0.202788	1.50808	0.853519	0.23759	0.128926	1.52882e-59	1.33841e-54
FBgn0030871	CG8142	0.202779	1.00054	0.698161	0.290447	0.102564	2.10225e-47	1.84042e-42
FBgn0034110	Atg9	0.202465	0.774678	0.639188	0.316754	0.13886	3.68322e-64	3.22448e-59
FBgn0041186	Slbp	0.202378	1.85864	0.871909	0.232109	0.0760786	2.27781e-35	1.99411e-30
FBgn0065032	Arpc3B	0.202359	0.501253	0.477489	0.423798	0.150425	1.44379e-69	1.26397e-64
FBgn0031881	MME1	0.202306	0.649697	0.575143	0.35175	0.142921	4.69667e-66	4.1117e-61
FBgn0036462	mRpL39	0.202118	1.21035	0.766646	0.26364	0.098396	1.68675e-45	1.47666e-40
FBgn0036534	DCP2	0.202073	1.14448	0.77045	0.262279	0.133395	1.28831e-61	1.12785e-56
FBgn0082598	akirin	0.201818	11.0255	1	0.201818	0.0293398	1.86686e-14	1.63434e-09
FBgn0005322	nmd	0.201805	0.922158	0.690552	0.292238	0.121843	2.89718e-56	2.53633e-51
FBgn0261560	Thor	0.201801	3.68604	0.869372	0.232122	0.0745656	1.09761e-34	9.60901e-30
FBgn0051229	CG31229	0.20176	0.832488	0.655675	0.307714	0.106909	2.15409e-49	1.88579e-44
FBgn0285949	RpL31	0.201723	45.5388	1	0.201723	0.000327523	0.42013	1
FBgn0085203	CG34174	0.201715	0.968385	0.714014	0.282509	0.0811874	1.11684e-37	9.77735e-33
FBgn0032051	CG13097	0.201688	0.844432	0.662016	0.304656	0.12637	2.33662e-58	2.04559e-53
FBgn0264325	Atg6	0.20153	0.755103	0.607483	0.331746	0.132879	2.23579e-61	1.95732e-56
FBgn0031622	CG3251	0.201508	0.416393	0.405834	0.496527	0.137613	1.40383e-63	1.22899e-58
FBgn0038947	Sar1	0.201431	3.44925	0.980977	0.205337	0.0995359	5.08951e-46	4.45561e-41
FBgn0265297	pAbp	0.201417	25.5446	1	0.201417	0.0012292	0.118288	1
FBgn0000100	RpLP0	0.201269	15.4091	1	0.201269	0.0108287	3.45097e-06	0.302115
FBgn0002579	RpL36	0.201212	49.4725	1	0.201212	0.000821128	0.201746	1
FBgn0022936	CycH	0.201071	1.25621	0.804692	0.249874	0.119112	5.27715e-55	4.61988e-50
FBgn0031950	Herp	0.201046	0.636361	0.572606	0.351107	0.127217	9.47085e-59	8.29125e-54
FBgn0029937	CG8300	0.201015	0.989031	0.715916	0.280781	0.134649	3.36572e-62	2.94652e-57
FBgn0030943	Nup35	0.200912	1.76162	0.858592	0.234002	0.0800175	3.7788e-37	3.30815e-32
FBgn0038376	Hmt-1	0.200863	0.670327	0.592898	0.338781	0.138545	5.16842e-64	4.52469e-59
FBgn0261597	RpS26	0.200851	52.2819	1	0.200851	0.00298254	0.0149464	1
FBgn0086558	Ubi-p5E	0.200559	3.23247	0.934686	0.214574	0.091822	1.66936e-42	1.46144e-37
FBgn0011725	twin	0.200537	1.51896	0.828155	0.24215	0.0832771	1.26393e-38	1.1065e-33
FBgn0037844	CG4570	0.200522	2.17244	0.887127	0.226035	0.0768995	9.70008e-36	8.49193e-31
FBgn0003978	vls	0.200497	1.09564	0.691186	0.290077	0.125746	4.54418e-58	3.9782e-53
FBgn0033688	Prp8	0.200397	0.965567	0.710209	0.282167	0.137143	2.32454e-63	2.03502e-58
FBgn0035753	RpL18	0.200393	43.2923	1	0.200393	0.00969762	1.12205e-05	0.982295
FBgn0016126	CaMKI	0.200384	1.16257	0.771084	0.259872	0.101619	5.68947e-47	4.98085e-42
FBgn0262109	lncRNA:CR42862	0.200342	1.1157	0.736842	0.271892	0.126845	1.40828e-58	1.23288e-53
FBgn0035980	mRRF1	0.200315	0.963886	0.706405	0.28357	0.0891339	2.78354e-41	2.43685e-36
FBgn0030245	CG1637	0.200302	1.34451	0.807863	0.247941	0.100644	1.58727e-46	1.38958e-41
FBgn0039306	RIOK2	0.200198	0.769701	0.627774	0.318902	0.127422	7.61179e-59	6.66374e-54
FBgn0029891	Pink1	0.200153	1.07542	0.741281	0.27001	0.10081	1.33239e-46	1.16644e-41
FBgn0023527	CG3071	0.200153	1.30256	0.783767	0.255373	0.0881681	7.64295e-41	6.69102e-36
FBgn0036825	RpL26	0.200134	52.5147	1	0.200134	0.00143436	0.0915315	1
FBgn0038989	CG6937	0.200084	1.15319	0.750793	0.266497	0.110426	5.24825e-51	4.59458e-46
FBgn0261608	RpL37A	0.200003	43.7594	1	0.200003	0.00196372	0.0483278	1
FBgn0001565	Hlc	0.199955	1.27843	0.805961	0.248095	0.101265	8.25288e-47	7.22498e-42
FBgn0028953	CG14478	0.199945	5.13254	0.996195	0.200708	0.047101	2.29896e-22	2.01262e-17
FBgn0032258	CG7456	0.19986	0.734326	0.611921	0.326611	0.116143	1.23314e-53	1.07955e-48
FBgn0032721	CG10602	0.199851	1.10409	0.730501	0.273581	0.0998141	3.79861e-46	3.32549e-41
FBgn0002590	RpS5a	0.199765	19.2465	1	0.199765	0.0130813	3.3342e-07	0.0291892
FBgn0037329	POLDIP2	0.19974	0.955681	0.715916	0.278998	0.108072	6.31291e-50	5.52664e-45
FBgn0036775	RpIIIC53	0.199688	0.638792	0.564997	0.353432	0.148472	1.18799e-68	1.04002e-63
FBgn0036107	galla-2	0.199687	0.812798	0.646798	0.308732	0.13472	3.11794e-62	2.7296e-57
FBgn0033918	CG8531	0.199685	0.823536	0.668358	0.298769	0.112464	6.07826e-52	5.32121e-47
FBgn0005672	spi	0.199678	2.25946	0.918833	0.217317	0.181159	4.19494e-84	3.67246e-79
FBgn0039128	CG13599	0.19966	0.984149	0.727964	0.274272	0.12579	4.33607e-58	3.79601e-53
FBgn0261477	slim	0.199603	0.938806	0.695625	0.28694	0.151461	4.71285e-70	4.12586e-65
FBgn0050359	Mal-A5	0.199441	0.892494	0.679138	0.293668	0.0978879	2.87682e-45	2.51851e-40
FBgn0034214	CG6550	0.199386	0.708795	0.592264	0.336651	0.106698	2.69211e-49	2.35681e-44
FBgn0263102	psq	0.199373	3.74112	0.983513	0.202715	0.0969854	7.42375e-45	6.49912e-40
FBgn0039858	CycG	0.199237	5.44587	0.997464	0.199744	0.0485575	5.1443e-23	4.50358e-18
FBgn0038755	Hs6st	0.199217	0.653585	0.585289	0.340374	0.119392	3.91912e-55	3.43099e-50
FBgn0050016	CG30016	0.199156	0.343201	0.351934	0.565891	0.138568	5.04022e-64	4.41246e-59
FBgn0051957	CG31957	0.199156	1.03013	0.734306	0.271217	0.113491	2.04854e-52	1.79339e-47
FBgn0035771	Sec63	0.19913	0.971559	0.71338	0.279136	0.11245	6.16779e-52	5.39959e-47
FBgn0261995	CG42813	0.199109	0.641442	0.574509	0.346573	0.104807	1.97898e-48	1.73249e-43
FBgn0027338	Kap-alpha3	0.198992	3.61897	0.957514	0.207821	0.0560769	2.23621e-26	1.95769e-21
FBgn0039450	Yif1	0.198913	1.20626	0.78884	0.252159	0.0892777	2.39473e-41	2.09646e-36
FBgn0264493	rdx	0.198884	4.08234	0.976538	0.203663	0.0726352	8.14902e-34	7.13406e-29
FBgn0004915	TfIIB	0.198827	1.27383	0.787571	0.252456	0.101885	4.29632e-47	3.76121e-42
FBgn0061200	Nup153	0.198827	0.903232	0.682308	0.291403	0.0989528	9.39449e-46	8.22441e-41
FBgn0004867	RpS2	0.198784	57.0513	1	0.198784	0.00318099	0.0119573	1
FBgn0038476	kuk	0.198692	5.60001	0.987318	0.201244	0.0467049	3.45353e-22	3.0234e-17
FBgn0031662	CG3792	0.198679	0.954314	0.697527	0.284834	0.146963	6.04488e-68	5.29199e-63
FBgn0003882	tub	0.198669	1.08974	0.739379	0.268698	0.101153	9.2882e-47	8.13136e-42
FBgn0035423	eIF1	0.198668	4.87936	0.993025	0.200063	0.0665872	4.30612e-31	3.76979e-26
FBgn0033454	CG1671	0.198578	0.787243	0.62714	0.316641	0.137988	9.39306e-64	8.22316e-59
FBgn0021874	Nle	0.198517	0.720012	0.617628	0.321418	0.130438	3.04207e-60	2.66318e-55
FBgn0029999	CG1575	0.198491	0.689454	0.571972	0.347029	0.113838	1.41838e-52	1.24173e-47
FBgn0031777	CG9154	0.198473	0.596765	0.54851	0.361841	0.151432	4.86267e-70	4.25703e-65
FBgn0032196	CG5708	0.198444	1.41353	0.842105	0.235652	0.129293	1.0325e-59	9.03901e-55
FBgn0023517	Pgam5	0.198429	1.48333	0.819911	0.242013	0.0764868	1.48993e-35	1.30436e-30
FBgn0038106	CG7488	0.198386	0.727541	0.615092	0.32253	0.122518	1.41285e-56	1.23688e-51
FBgn0030364	Lsm12	0.198372	3.1739	0.960051	0.206627	0.0675501	1.5887e-31	1.39083e-26
FBgn0003479	spn-A	0.198367	0.909776	0.700698	0.283099	0.117585	2.67137e-54	2.33865e-49
FBgn0025820	JTBR	0.198319	1.05131	0.731769	0.271013	0.099943	3.31685e-46	2.90374e-41
FBgn0019949	Cdk9	0.198162	1.04094	0.728599	0.271976	0.116574	7.80952e-54	6.83684e-49
FBgn0270924	zf30C	0.198034	1.23976	0.802156	0.246877	0.114059	1.12196e-52	9.82217e-48
FBgn0261885	osa	0.197884	1.11983	0.77045	0.256842	0.111489	1.70578e-51	1.49333e-46
FBgn0015797	Rab6	0.197856	1.54302	0.844008	0.234425	0.108711	3.21459e-50	2.81421e-45
FBgn0052448	CG32448	0.19776	0.987222	0.715916	0.276233	0.0847126	2.826e-39	2.47402e-34
FBgn0004924	Top1	0.197731	5.05583	0.994927	0.198739	0.0300279	9.22726e-15	8.078e-10
FBgn0266409	CG45049	0.197534	4.43503	0.989854	0.199558	0.0520839	1.36731e-24	1.19701e-19
FBgn0039094	CG10184	0.197518	0.553777	0.41598	0.474825	0.129909	5.35307e-60	4.68635e-55
FBgn0039149	CG18428	0.197504	1.06753	0.757134	0.260857	0.133439	1.22804e-61	1.07508e-56
FBgn0038424	CG17565	0.197433	0.687379	0.592898	0.332997	0.151581	4.14214e-70	3.62624e-65
FBgn0032949	Lamp1	0.197404	3.35555	0.96766	0.204002	0.0546057	1.01858e-25	8.91718e-21
FBgn0011305	Rsf1	0.197385	5.43751	0.998732	0.197636	0.106022	5.4965e-49	4.81191e-44
FBgn0032587	CG5953	0.197372	0.525444	0.476855	0.413904	0.154535	1.69711e-71	1.48573e-66
FBgn0033060	CG7849	0.197311	0.693787	0.596703	0.33067	0.150033	2.20516e-69	1.93051e-64
FBgn0031359	Rim2	0.19731	0.675115	0.584654	0.337482	0.103754	6.00453e-48	5.25667e-43
FBgn0034968	RpL12	0.197264	42.3559	1	0.197264	0.00216306	0.0382352	1
FBgn0032216	Usp14	0.197227	2.20915	0.923906	0.213471	0.0747833	8.75461e-35	7.66422e-30
FBgn0034418	CG15118	0.197216	0.684317	0.59163	0.333343	0.146986	5.89631e-68	5.16192e-63
FBgn0261710	nocte	0.197189	1.24692	0.781864	0.252204	0.0978048	3.13938e-45	2.74837e-40
FBgn0039914	mav	0.19709	1.57582	0.829423	0.237624	0.0888501	3.74578e-41	3.27924e-36
FBgn0036402	CG6650	0.197055	0.699963	0.600507	0.328148	0.134192	5.48695e-62	4.80355e-57
FBgn0033761	CG8778	0.196938	0.517005	0.486367	0.404916	0.129687	6.77957e-60	5.93517e-55
FBgn0021875	Zfrp8	0.1969	0.871625	0.667089	0.295162	0.129144	1.21087e-59	1.06005e-54
FBgn0004401	Pep	0.196855	5.57834	0.998732	0.197105	0.0727787	7.02109e-34	6.14661e-29
FBgn0037643	ScsbetaA	0.196853	0.881932	0.687381	0.286381	0.0882192	7.24573e-41	6.34327e-36
FBgn0035318	CG9018	0.196805	1.01666	0.722892	0.272247	0.105221	1.27922e-48	1.11989e-43
FBgn0052814	CG32814	0.196747	0.53346	0.466709	0.421562	0.160013	4.47778e-74	3.92007e-69
FBgn0033605	CG9067	0.196721	0.790552	0.646164	0.304444	0.112255	7.58149e-52	6.63721e-47
FBgn0030851	CG8326	0.196659	0.810177	0.644261	0.305247	0.108999	2.37213e-50	2.07668e-45
FBgn0036844	Mkp3	0.196556	1.35154	0.793912	0.247578	0.0789941	1.09701e-36	9.60374e-32
FBgn0035842	CG7504	0.196534	0.73764	0.60558	0.324538	0.108819	2.86919e-50	2.51183e-45
FBgn0038828	CG17270	0.196525	1.05666	0.715916	0.274508	0.0951332	5.18752e-44	4.54141e-39
FBgn0022985	qkr58E-2	0.196473	1.25959	0.814204	0.241306	0.0966791	1.02405e-44	8.96506e-40
FBgn0035482	CG14985	0.196465	0.998568	0.707673	0.277622	0.0775747	4.80557e-36	4.20703e-31
FBgn0013749	Arf102F	0.196448	2.85759	0.958782	0.204893	0.0704513	7.85565e-33	6.87723e-28
FBgn0052109	CG32109	0.196434	0.618257	0.547242	0.358953	0.116702	6.81693e-54	5.96788e-49
FBgn0263490	mld	0.196401	0.868342	0.68104	0.288383	0.0983899	1.69763e-45	1.48619e-40
FBgn0035425	CG17746	0.196344	0.83013	0.675333	0.290737	0.0922072	1.11497e-42	9.76104e-38
FBgn0051460	CG31460	0.196339	1.65168	0.843373	0.232802	0.10108	1.00326e-46	8.78305e-42
FBgn0031270	CG13689	0.196322	1.13496	0.735574	0.266897	0.0776822	4.29728e-36	3.76205e-31
FBgn0263977	Tim17b	0.196218	4.54394	0.991122	0.197976	0.048278	6.85706e-23	6.00301e-18
FBgn0011715	Snr1	0.196157	2.73806	0.943564	0.207889	0.0704603	7.78307e-33	6.81369e-28
FBgn0031273	CG2839	0.196103	0.695288	0.575143	0.340964	0.183684	2.61596e-85	2.29014e-80
FBgn0040309	Jafrac1	0.196072	3.67964	0.944198	0.20766	0.111355	1.96402e-51	1.7194e-46
FBgn0020660	eIF4B	0.19605	2.54779	0.915029	0.214256	0.0617772	6.23167e-29	5.45552e-24
FBgn0052068	Adi1	0.19601	0.645608	0.577045	0.339678	0.127791	5.13524e-59	4.49565e-54
FBgn0025519	fidipidine	0.195828	0.636272	0.570704	0.343135	0.120965	7.37149e-56	6.45337e-51
FBgn0017545	RpS3A	0.195814	77.8351	1	0.195814	0.00559448	0.000855311	1
FBgn0027554	CG8042	0.195671	0.72881	0.607483	0.322101	0.120361	1.40067e-55	1.22621e-50
FBgn0266268	FeCH	0.195656	0.686838	0.587825	0.332848	0.145726	2.29241e-67	2.00689e-62
FBgn0010516	wal	0.195621	1.90855	0.907419	0.215579	0.0540203	1.86168e-25	1.62981e-20
FBgn0259482	Mob3	0.195366	1.12522	0.764109	0.255678	0.114215	9.51302e-53	8.32817e-48
FBgn0028990	Spn27A	0.195363	0.937265	0.688015	0.283951	0.0910041	3.93132e-42	3.44168e-37
FBgn0036306	CG10973	0.195351	0.979491	0.718453	0.271905	0.113223	2.72161e-52	2.38263e-47
FBgn0040007	RpL38	0.19526	60.0635	1	0.19526	0.00678758	0.000239546	1
FBgn0259112	asRNA:CR42254	0.195234	0.734874	0.615726	0.31708	0.124353	2.00338e-57	1.75386e-52
FBgn0017550	Rga	0.19523	1.42971	0.829423	0.23538	0.0803346	2.71584e-37	2.37758e-32
FBgn0030063	CG1789	0.195069	1.63078	0.853519	0.228547	0.0743917	1.31491e-34	1.15113e-29
FBgn0285947	RpS10b	0.195034	42.8165	1	0.195034	0.00166914	0.0687142	1
FBgn0038108	CG7518	0.194989	0.928467	0.705136	0.276527	0.107245	1.51211e-49	1.32378e-44
FBgn0040705	ND-B8	0.194932	0.371909	0.358275	0.544085	0.151278	5.74269e-70	5.02744e-65
FBgn0037942	CG14721	0.194874	0.444478	0.428028	0.455283	0.145616	2.58188e-67	2.2603e-62
FBgn0037378	CG2046	0.194867	0.882469	0.685479	0.284278	0.155754	4.53595e-72	3.971e-67
FBgn0263396	sqd	0.194736	10.3357	1	0.194736	0.0164091	1.07537e-08	0.000941432
FBgn0260991	Incenp	0.194686	2.29391	0.925808	0.210287	0.0807597	1.74409e-37	1.52687e-32
FBgn0001308	Khc	0.194665	1.08829	0.735574	0.264643	0.0896808	1.57061e-41	1.37499e-36
FBgn0063449	Uhg2	0.194536	2.06464	0.903614	0.215286	0.0944182	1.09834e-43	9.61539e-39
FBgn0036263	thoc6	0.194531	1.33862	0.790742	0.246011	0.0758585	2.86345e-35	2.50681e-30
FBgn0033210	U2A	0.194521	1.28076	0.79201	0.245604	0.157817	4.84864e-73	4.24474e-68
FBgn0034001	mRpL41	0.194491	1.18235	0.773621	0.251404	0.0774697	5.36031e-36	4.69269e-31
FBgn0031664	CG8892	0.194471	0.975999	0.70577	0.275545	0.104939	1.72135e-48	1.50696e-43
FBgn0030406	CG1463	0.194449	0.975661	0.697527	0.278768	0.106689	2.71717e-49	2.37875e-44
FBgn0027526	Ublcp1	0.194411	1.39705	0.795181	0.244486	0.0600548	3.69144e-28	3.23167e-23
FBgn0051453	pch2	0.194383	1.43958	0.821814	0.236529	0.0748759	7.95138e-35	6.96104e-30
FBgn0020388	Gcn5	0.194337	0.998518	0.710843	0.273389	0.101284	8.09556e-47	7.08726e-42
FBgn0035422	RpL28	0.194316	64.7198	1	0.194316	0.0191046	6.72562e-10	5.88794e-05
FBgn0025366	Ip259	0.193986	5.94822	0.996829	0.194603	0.0200604	2.52047e-10	2.20654e-05
FBgn0039111	PTPMT1	0.193953	0.695646	0.590361	0.328533	0.128125	3.59421e-59	3.14655e-54
FBgn0265351	nac	0.193917	0.573515	0.526316	0.368442	0.115616	2.15588e-53	1.88736e-48
FBgn0030086	CCT2	0.193884	1.47162	0.819911	0.236469	0.069883	1.41611e-32	1.23974e-27
FBgn0016917	Stat92E	0.193815	1.06532	0.753963	0.257062	0.0894165	2.07098e-41	1.81304e-36
FBgn0040010	CG17493	0.193642	2.88152	0.948637	0.204126	0.0604364	2.48933e-28	2.17928e-23
FBgn0038858	CG5793	0.193617	0.584428	0.545339	0.355039	0.133711	9.18083e-62	8.03735e-57
FBgn0001995	mRpL4	0.193595	1.16627	0.763475	0.25357	0.0886025	4.85267e-41	4.24827e-36
FBgn0262560	wcd	0.193585	0.793153	0.643627	0.300772	0.0896775	1.57614e-41	1.37983e-36
FBgn0031452	Cwc25	0.193532	1.54732	0.846544	0.228614	0.0589152	1.19695e-27	1.04787e-22
FBgn0031343	CG18131	0.193486	0.392778	0.360812	0.536252	0.14856	1.08039e-68	9.45831e-64
FBgn0037093	Cdk12	0.193289	1.05377	0.737476	0.262095	0.117944	1.824e-54	1.59682e-49
FBgn0038312	Zip88E	0.193266	0.606711	0.529486	0.365006	0.125933	3.72392e-58	3.26011e-53
FBgn0028325	Pdha	0.193153	1.06476	0.726696	0.265796	0.0825567	2.67958e-38	2.34584e-33
FBgn0031851	Aatf	0.193118	1.28225	0.79962	0.241512	0.106026	5.47257e-49	4.79096e-44
FBgn0015527	peng	0.192895	1.17807	0.762841	0.252865	0.0898369	1.33396e-41	1.16782e-36
FBgn0038922	Idh3b	0.192888	0.860428	0.673431	0.286426	0.090092	1.02137e-41	8.94161e-37
FBgn0283472	S6k	0.192847	1.6334	0.86747	0.22231	0.095072	5.5318e-44	4.84282e-39
FBgn0026749	Yippee	0.192589	1.44277	0.821179	0.234527	0.0827587	2.17052e-38	1.90018e-33
FBgn0030786	mRpL22	0.192492	1.50799	0.830691	0.231726	0.098705	1.21906e-45	1.06723e-40
FBgn0015818	Spx	0.192375	1.94097	0.884591	0.217474	0.09558	3.24619e-44	2.84188e-39
FBgn0032244	RfC3	0.192356	0.555261	0.519975	0.369934	0.137524	1.54468e-63	1.35229e-58
FBgn0031977	baf	0.192339	7.51573	0.998732	0.192583	0.0705237	7.28779e-33	6.3801e-28
FBgn0266598	Kmn2	0.192204	1.85462	0.906151	0.21211	0.133599	1.03496e-61	9.06052e-57
FBgn0003274	RpLP2	0.192145	75.1575	1	0.192145	0.0689614	3.68142e-32	3.2229e-27
FBgn0037241	CG14646	0.192031	0.740339	0.627774	0.305892	0.130298	3.5331e-60	3.09305e-55
FBgn0004832	Xpac	0.192	0.650085	0.56246	0.341357	0.167236	1.73177e-77	1.51608e-72
FBgn0267976	Tim23	0.191961	1.55519	0.861763	0.222753	0.104138	4.00367e-48	3.50502e-43
FBgn0034564	CG9344	0.191902	1.43253	0.830057	0.231191	0.131265	1.2563e-60	1.09983e-55
FBgn0036812	Nufip	0.191868	0.683779	0.588459	0.326052	0.109109	2.11064e-50	1.84776e-45
FBgn0037468	CG1943	0.191819	3.29403	0.979074	0.195919	0.0872853	1.92352e-40	1.68395e-35
FBgn0035141	Cypl	0.191649	1.54161	0.847178	0.226221	0.0734137	3.63135e-34	3.17907e-29
FBgn0031003	CG7889	0.191539	0.639516	0.557387	0.343637	0.104154	3.93702e-48	3.44666e-43
FBgn0040634	CG4186	0.191473	0.479507	0.462904	0.413634	0.145698	2.36344e-67	2.06907e-62
FBgn0036314	Sf3a2	0.191446	1.40987	0.832594	0.229939	0.0882057	7.34855e-41	6.43329e-36
FBgn0033471	CG12134	0.191376	0.782245	0.634115	0.301801	0.0938094	2.07967e-43	1.82065e-38
FBgn0004581	bgcn	0.191273	0.338323	0.34052	0.561709	0.150165	1.91038e-69	1.67244e-64
FBgn0036932	CG14184	0.191183	1.36517	0.826252	0.231386	0.112609	5.21036e-52	4.56141e-47
FBgn0032346	Csl4	0.19116	1.12929	0.757134	0.252479	0.0681221	8.7842e-32	7.69013e-27
FBgn0038771	CG4390	0.191155	1.25188	0.772353	0.247498	0.0695062	2.09293e-32	1.83226e-27
FBgn0040346	CG3704	0.191047	0.948631	0.686747	0.278192	0.089199	2.60039e-41	2.27651e-36
FBgn0015791	Rab14	0.191047	1.98656	0.908053	0.210392	0.0825756	2.62719e-38	2.29998e-33
FBgn0039544	CG12877	0.190962	1.24766	0.768548	0.248471	0.0882351	7.12608e-41	6.23853e-36
FBgn0000250	cact	0.19091	1.21288	0.778694	0.245168	0.0713929	2.95806e-33	2.58963e-28
FBgn0037841	CG4565	0.190871	0.414692	0.410273	0.465228	0.149695	3.1751e-69	2.77965e-64
FBgn0286516	aqz	0.190814	22.2139	1	0.190814	0.00117445	0.126808	1
FBgn0026431	Grip75	0.19078	0.822363	0.643627	0.296414	0.0909017	4.37602e-42	3.83099e-37
FBgn0014184	Oda	0.190768	8.69151	1	0.190768	0.0101668	6.87669e-06	0.60202
FBgn0043903	dome	0.190706	1.1536	0.758402	0.251458	0.0836335	8.71451e-39	7.62912e-34
FBgn0262975	cnc	0.190701	0.812511	0.577045	0.330479	0.109889	9.25971e-51	8.10641e-46
FBgn0035016	CG4612	0.190699	1.28491	0.786937	0.242331	0.0892972	2.34629e-41	2.05406e-36
FBgn0016977	spen	0.19067	3.9073	0.982879	0.193992	0.10027	2.35217e-46	2.05921e-41
FBgn0262467	Scox	0.190642	0.83491	0.662651	0.287696	0.118056	1.62041e-54	1.41859e-49
FBgn0031252	CG13690	0.190636	1.02097	0.710843	0.268182	0.0861374	6.38265e-40	5.58769e-35
FBgn0035149	MED30	0.190589	0.99544	0.724794	0.262956	0.116372	9.66917e-54	8.46488e-49
FBgn0030354	Upf1	0.190568	0.73376	0.607483	0.313702	0.109421	1.5181e-50	1.32902e-45
FBgn0042092	CG13773	0.19047	0.931275	0.693088	0.274814	0.0957923	2.59781e-44	2.27425e-39
FBgn0029899	CG14438	0.190426	0.893521	0.661382	0.287921	0.10271	1.80309e-47	1.57851e-42
FBgn0036735	Edc3	0.190422	0.728887	0.606214	0.314116	0.145013	4.94132e-67	4.32588e-62
FBgn0038612	cona	0.190381	0.406679	0.345593	0.550883	0.144875	5.73538e-67	5.02104e-62
FBgn0034988	cN-IIIB	0.190323	0.582985	0.519341	0.366471	0.101979	3.89229e-47	3.4075e-42
FBgn0040367	CG11382	0.190313	0.477771	0.424857	0.447945	0.15901	1.32986e-73	1.16423e-68
FBgn0034921	DCP1	0.190237	1.12928	0.746988	0.254672	0.0945629	9.43615e-44	8.26088e-39
FBgn0030813	CG4949	0.190015	1.35031	0.805327	0.235948	0.0830804	1.55177e-38	1.3585e-33
FBgn0032236	mRpS7	0.190007	1.82161	0.901078	0.210866	0.0720512	1.49395e-33	1.30788e-28
FBgn0012058	Cdc27	0.189796	1.00385	0.729233	0.260268	0.0946276	8.81674e-44	7.71861e-39
FBgn0028697	RpL15	0.189678	50.6635	1	0.189678	0.00696924	0.000197572	1
FBgn0004556	Dbp73D	0.189675	0.774486	0.631579	0.300319	0.0873483	1.80082e-40	1.57653e-35
FBgn0262101	CG42854	0.189646	0.494602	0.384908	0.492705	0.148906	7.43617e-69	6.50999e-64
FBgn0260856	Membrin	0.189557	0.744791	0.600507	0.315662	0.119138	5.13328e-55	4.49393e-50
FBgn0038609	Nup43	0.189527	0.747929	0.6487	0.292164	0.115229	3.24919e-53	2.8445e-48
FBgn0024183	vig	0.189507	2.37299	0.916931	0.206676	0.128128	3.58253e-59	3.13633e-54
FBgn0031544	CG17593	0.189506	0.975383	0.711477	0.266355	0.093127	4.25291e-43	3.72321e-38
FBgn0034142	CG8306	0.189467	0.881397	0.609385	0.310915	0.131903	6.35429e-61	5.56287e-56
FBgn0033017	CG10465	0.189311	1.99213	0.889664	0.212789	0.0801381	3.33266e-37	2.91758e-32
FBgn0032907	CG9272	0.189305	0.707356	0.613824	0.308403	0.107758	8.79091e-50	7.696e-45
FBgn0030208	PPP4R2r	0.189298	1.65232	0.872543	0.21695	0.0902472	8.68284e-42	7.60139e-37
FBgn0032341	Reps	0.189288	0.72924	0.618897	0.305847	0.103209	1.06566e-47	9.32932e-43
FBgn0038306	Art3	0.189223	0.729561	0.615726	0.307317	0.0940369	1.63818e-43	1.43415e-38
FBgn0284245	eEF1alpha1	0.189191	122.318	1	0.189191	0.0446704	2.79155e-21	2.44386e-16
FBgn0032205	CG4957	0.189147	0.580035	0.532657	0.3551	0.103536	7.55677e-48	6.61557e-43
FBgn0002354	l(3)87Df	0.18911	0.911662	0.693088	0.272852	0.11957	3.24628e-55	2.84196e-50
FBgn0034570	CG10543	0.189106	2.20222	0.915029	0.206667	0.0824552	2.97875e-38	2.60775e-33
FBgn0027583	CG7601	0.189028	0.464759	0.44832	0.421637	0.128118	3.62189e-59	3.17079e-54
FBgn0039732	CG15525	0.188945	1.12597	0.765377	0.246865	0.105992	5.67008e-49	4.96387e-44
FBgn0031643	CG3008	0.188915	0.837625	0.65948	0.286461	0.106965	2.0307e-49	1.77777e-44
FBgn0014032	Sptr	0.188882	0.94663	0.674065	0.280213	0.0634356	1.12249e-29	9.82688e-25
FBgn0038576	Arp5	0.188808	0.776159	0.635384	0.297156	0.120971	7.32299e-56	6.41091e-51
FBgn0011826	Pp2B-14D	0.188722	0.878242	0.667724	0.282635	0.0925774	7.56551e-43	6.62323e-38
FBgn0033844	bbc	0.188707	1.48787	0.818643	0.230511	0.0702229	9.95535e-33	8.71541e-28
FBgn0035390	scramb2	0.188678	1.00494	0.717185	0.263082	0.107603	1.03554e-49	9.06561e-45
FBgn0085188	CG34159	0.188564	2.08675	0.923906	0.204095	0.0607125	1.87169e-28	1.63857e-23
FBgn0035766	eco	0.188531	0.825635	0.653139	0.288654	0.0912446	3.05603e-42	2.6754e-37
FBgn0266691	lncRNA:CR45181	0.18853	0.694992	0.57007	0.330714	0.120321	1.46168e-55	1.27963e-50
FBgn0039828	CG1542	0.188475	1.06529	0.737476	0.255568	0.0723701	1.07301e-33	9.39363e-29
FBgn0262617	CG43143	0.188457	0.875734	0.675967	0.278796	0.15051	1.31725e-69	1.15319e-64
FBgn0015288	RpL22	0.188397	8.46265	0.998732	0.188636	0.0060062	0.000550408	1
FBgn0043012	AP-2sigma	0.188369	1.30623	0.81357	0.231534	0.114992	4.17769e-53	3.65736e-48
FBgn0003517	sta	0.188342	31.8687	1	0.188342	0.0107868	3.60469e-06	0.315572
FBgn0027598	cindr	0.188292	5.98742	0.993659	0.189493	0.0299069	1.04446e-14	9.14375e-10
FBgn0067629	CG33332	0.18827	0.755592	0.626506	0.300508	0.110063	7.70396e-51	6.74443e-46
FBgn0010926	l(3)07882	0.188186	1.00999	0.712112	0.264265	0.114908	4.56731e-53	3.99845e-48
FBgn0030177	CG2972	0.188142	0.818751	0.630945	0.298191	0.0882693	6.87599e-41	6.01959e-36
FBgn0011817	nmo	0.188129	12.9845	0.999366	0.188248	0.0512292	3.29532e-24	2.88489e-19
FBgn0033225	TTLL12	0.188129	0.64808	0.576411	0.32638	0.102299	2.77903e-47	2.4329e-42
FBgn0027588	GCS2alpha	0.188103	1.05737	0.74572	0.252244	0.0879019	1.00964e-40	8.83893e-36
FBgn0036538	CG15715	0.188057	2.57818	0.951807	0.197579	0.045606	1.06803e-21	9.35009e-17
FBgn0013720	pck	0.187998	1.20183	0.76728	0.245019	0.0850714	1.94311e-39	1.70109e-34
FBgn0002593	RpLP1	0.187936	75.8957	1	0.187936	0.03471	7.62449e-17	6.67486e-12
FBgn0286781	cass	0.187903	1.9229	0.913126	0.20578	0.0796829	5.35451e-37	4.6876e-32
FBgn0036702	CG6512	0.187662	0.883525	0.678503	0.276582	0.0872911	1.91174e-40	1.67363e-35
FBgn0032812	Hakai	0.187642	0.963958	0.701966	0.267309	0.0797449	5.01933e-37	4.39417e-32
FBgn0036018	CG3335	0.187468	0.962176	0.711477	0.263492	0.090294	8.26751e-42	7.23779e-37
FBgn0030241	feo	0.187455	3.38709	0.937857	0.199876	0.0345731	8.77317e-17	7.68047e-12
FBgn0015546	spel1	0.187441	0.653588	0.57007	0.328804	0.107409	1.2712e-49	1.11287e-44
FBgn0022768	Pp2C1	0.187385	1.81672	0.854788	0.219218	0.0772204	6.94748e-36	6.08217e-31
FBgn0014342	mia	0.187362	0.388162	0.409639	0.457384	0.135902	8.79317e-63	7.69798e-58
FBgn0033183	CG1620	0.187313	0.849111	0.664553	0.281863	0.0873822	1.73813e-40	1.52164e-35
FBgn0263998	Ack-like	0.187256	0.750168	0.625872	0.299193	0.140406	7.00953e-65	6.13649e-60
FBgn0031392	AIF	0.187233	0.793807	0.641725	0.291765	0.138807	3.90174e-64	3.41578e-59
FBgn0036888	CG9330	0.187132	0.970975	0.710209	0.263489	0.0999231	3.38723e-46	2.96535e-41
FBgn0032961	CG1416	0.187106	1.87442	0.896005	0.208823	0.0635154	1.03354e-29	9.04816e-25
FBgn0001226	Hsp27	0.187042	9.75374	0.997464	0.187518	0.0856045	1.11362e-39	9.74917e-35
FBgn0024921	Tnpo	0.18699	1.61627	0.854153	0.218918	0.0766929	1.2026e-35	1.05282e-30
FBgn0029873	CG3918	0.186935	1.16346	0.767914	0.243433	0.0745121	1.16033e-34	1.01581e-29
FBgn0266101	CG44838	0.186902	1.62494	0.863665	0.216405	0.0735292	3.22113e-34	2.81994e-29
FBgn0266410	CG45050	0.186854	13.3039	1	0.186854	0.0116788	1.4264e-06	0.124874
FBgn0025373	Fpps	0.186849	1.51087	0.842739	0.221716	0.0746133	1.04456e-34	9.14461e-30
FBgn0000117	arm	0.186751	2.72151	0.958782	0.194779	0.0631737	1.47152e-29	1.28824e-24
FBgn0028331	l(1)G0289	0.186709	0.995918	0.719087	0.259648	0.0736954	2.71034e-34	2.37277e-29
FBgn0038471	CG5220	0.186461	0.903212	0.682308	0.273279	0.0888498	3.74688e-41	3.28021e-36
FBgn0263855	BubR1	0.186344	0.719249	0.611287	0.304838	0.108076	6.28901e-50	5.50571e-45
FBgn0028968	gammaCOP	0.186336	0.856774	0.658212	0.283094	0.10401	4.58589e-48	4.01471e-43
FBgn0005355	Su(fu)	0.186296	1.05212	0.715282	0.260451	0.061134	1.21103e-28	1.06019e-23
FBgn0030400	Pits	0.1861	2.76276	0.942295	0.197496	0.107499	1.15574e-49	1.01179e-44
FBgn0011481	Ssdp	0.186046	2.29397	0.927077	0.20068	0.0810834	1.24469e-37	1.08967e-32
FBgn0031090	Rab35	0.18603	1.57527	0.837666	0.222081	0.0738996	2.19232e-34	1.91927e-29
FBgn0032717	CG10600	0.185982	0.840884	0.666455	0.279061	0.0991667	7.50285e-46	6.56837e-41
FBgn0250874	ttm50	0.185865	0.819048	0.629042	0.295473	0.135342	1.6012e-62	1.40177e-57
FBgn0037008	mTerf3	0.185811	0.602504	0.5409	0.343522	0.104938	1.72258e-48	1.50803e-43
FBgn0050000	GstT1	0.185765	1.05383	0.700063	0.265355	0.0748023	8.58268e-35	7.5137e-30
FBgn0030306	Spase25	0.185737	1.85189	0.885225	0.209819	0.0393856	6.32361e-19	5.53601e-14
FBgn0016978	snRNP-U1-70K	0.185726	1.82919	0.871909	0.213011	0.0657765	9.96565e-31	8.72442e-26
FBgn0034335	GstE1	0.185707	0.827195	0.637286	0.291402	0.0784268	1.97995e-36	1.73335e-31
FBgn0261562	CG42676	0.185579	0.830112	0.669626	0.277138	0.126069	3.21972e-58	2.8187e-53
FBgn0036990	mRpL15	0.185459	1.2177	0.79962	0.231934	0.0889328	3.43533e-41	3.00746e-36
FBgn0041775	tral	0.18522	5.18499	0.979708	0.189056	0.0283027	5.40043e-14	4.72781e-09
FBgn0036366	JMJD7	0.185113	0.456836	0.462904	0.399894	0.116317	1.02468e-53	8.97056e-49
FBgn0033015	d4	0.185048	1.8391	0.863665	0.214259	0.0615986	7.49407e-29	6.56069e-24
FBgn0015338	CG5861	0.18496	1.58451	0.860495	0.214946	0.0555301	3.92907e-26	3.4397e-21
FBgn0001942	eIF4A	0.18489	28.2004	1	0.18489	0.00137011	0.0991195	1
FBgn0034422	CG7137	0.184836	0.855722	0.653773	0.282722	0.101321	7.78141e-47	6.81223e-42
FBgn0036892	Lon	0.184778	0.668504	0.590361	0.312991	0.11043	5.22716e-51	4.57612e-46
FBgn0016970	l(2)k10201	0.184774	0.521353	0.495244	0.373098	0.136615	4.09618e-63	3.586e-58
FBgn0038704	CG5316	0.184727	0.869897	0.680406	0.271495	0.103471	8.09291e-48	7.08494e-43
FBgn0040918	schlank	0.184619	1.76113	0.87825	0.210212	0.086866	2.98117e-40	2.60987e-35
FBgn0030529	Clic	0.184605	1.47167	0.833228	0.221554	0.0722752	1.18416e-33	1.03667e-28
FBgn0033085	CG15908	0.184592	0.767517	0.629677	0.293154	0.115768	1.83419e-53	1.60575e-48
FBgn0261479	nero	0.184584	1.1023	0.746988	0.247104	0.0892659	2.42455e-41	2.12257e-36
FBgn0039767	CG2218	0.184565	1.20422	0.772987	0.238769	0.102756	1.71769e-47	1.50375e-42
FBgn0016041	Tom40	0.184418	1.44065	0.826886	0.223027	0.0612169	1.11167e-28	9.73215e-24
FBgn0034849	CG3500	0.184357	1.0962	0.76728	0.240274	0.143309	3.09461e-66	2.70918e-61
FBgn0036889	CG14100	0.184306	0.545421	0.514902	0.357944	0.131128	1.45539e-60	1.27412e-55
FBgn0052056	scramb1	0.184252	0.695179	0.595434	0.309442	0.118471	1.04276e-54	9.1288e-50
FBgn0033467	Pdrg1	0.184242	0.740438	0.599873	0.307135	0.0847629	2.68125e-39	2.3473e-34
FBgn0027090	GlnRS	0.184225	0.823703	0.658212	0.279887	0.0606264	2.04572e-28	1.79092e-23
FBgn0035295	Cnb	0.184224	0.857902	0.663919	0.27748	0.140659	5.34115e-65	4.67591e-60
FBgn0050159	CG30159	0.184064	0.698656	0.587825	0.313127	0.116254	1.09556e-53	9.59104e-49
FBgn0004811	fs(2)ltoPP43	0.184037	1.37061	0.83513	0.22037	0.0854685	1.28357e-39	1.1237e-34
FBgn0259745	wech	0.183981	2.70007	0.934052	0.196971	0.0575577	4.8567e-27	4.2518e-22
FBgn0040786	CG14104	0.183898	0.711522	0.581484	0.316257	0.13723	2.11861e-63	1.85474e-58
FBgn0038950	CG5382	0.183896	0.618604	0.563094	0.326581	0.115817	1.74211e-53	1.52513e-48
FBgn0038582	CG7988	0.183835	0.705439	0.620799	0.296126	0.116816	6.04172e-54	5.28922e-49
FBgn0086384	Mer	0.183816	0.821263	0.646164	0.284474	0.0852838	1.55662e-39	1.36275e-34
FBgn0036516	CG7656	0.183815	1.61144	0.866202	0.212208	0.0806041	2.05096e-37	1.79551e-32
FBgn0033781	CG13319	0.18367	0.815598	0.644895	0.284806	0.0777758	3.89828e-36	3.41275e-31
FBgn0036460	CG5114	0.183631	0.575336	0.528852	0.347225	0.135566	1.26032e-62	1.10335e-57
FBgn0025725	alphaCOP	0.183559	0.711321	0.612555	0.29966	0.109556	1.31684e-50	1.15283e-45
FBgn0025633	CG13366	0.18354	0.986036	0.684845	0.268003	0.0935418	2.75319e-43	2.41028e-38
FBgn0033264	Nup50	0.183533	1.34507	0.79201	0.231731	0.0599447	4.13583e-28	3.62071e-23
FBgn0024987	ssx	0.183432	1.07883	0.74572	0.24598	0.117983	1.75005e-54	1.53208e-49
FBgn0037715	CG9399	0.183311	0.922743	0.703234	0.260669	0.084409	3.87956e-39	3.39636e-34
[truncated: 1 more rows]
